# Supplementary material for: A Series of New Pyrrole Alkaloids with ALR2 Inhibitory Activities from the Sponge Stylissa massa
Source: MDPI journal article supplement (doi:10.3390/md20070454), 2022-07-12
Supplement: s1 [file s1]

## **Supporting Information**

### **A Series of new Pyrrole Alkaloids with ALR2 Inhibitory Activities from the Sponge**

#### ***Stylissa massa***

Qi Wang,<sup>†,▽</sup> Chunhua Gao,<sup>†,▽</sup> Zhun Wei,<sup>†</sup> Xiaowen Tang,<sup>†</sup> Lixia Ji,<sup>†</sup> Xiangchao Luo,<sup>‡</sup> Xiaoping Peng,<sup>†</sup> Gang Li,<sup>†</sup> and Hongxiang Lou<sup>\*,†</sup>

<sup>†</sup>Department of Natural Medicinal Chemistry and Pharmacognosy, School of Pharmacy, Qingdao University, Qingdao 266021, People's Republic of China.

<sup>‡</sup>Research Center for Marine Drugs, Department of Pharmacy, Ren Ji Hospital, School of Medicine, Shanghai Jiao Tong University, Shanghai, 200127, People's Republic of China.

\*E-mail: louhongxiang@sdu.edu.cn.

## Table of Contents

|            |                                                                                                                                                                                                                                                                                                       |    |
|------------|-------------------------------------------------------------------------------------------------------------------------------------------------------------------------------------------------------------------------------------------------------------------------------------------------------|----|
| Table S1   | <sup>13</sup> C (125 MHz) NMR Data for <b>1–5</b> and <b>13–14</b> acquired in DMSO- <i>d</i> <sub>6</sub> .                                                                                                                                                                                          | 6  |
| Table S2   | <sup>1</sup> H (500 MHz) NMR Data for <b>1–5</b> and <b>13–14</b> acquired in DMSO- <i>d</i> <sub>6</sub> .                                                                                                                                                                                           | 6  |
| Table S3   | <sup>13</sup> C (125 MHz) NMR Data for <b>6–12</b> acquired in DMSO- <i>d</i> <sub>6</sub> .                                                                                                                                                                                                          | 7  |
| Table S4   | <sup>1</sup> H (500 MHz) NMR Data for <b>6–12</b> acquired in DMSO- <i>d</i> <sub>6</sub> .                                                                                                                                                                                                           | 7  |
| Table S5   | X-ray diffraction analysis of compound <b>1</b> .                                                                                                                                                                                                                                                     | 8  |
| Table S6   | X-ray diffraction analysis of compound <b>5</b> .                                                                                                                                                                                                                                                     | 9  |
| Table S7   | X-ray diffraction analysis of compound <b>10</b> .                                                                                                                                                                                                                                                    | 10 |
| Figure S1  | The LC-CD analysis figure of compounds <b>1a</b> ( <i>R</i> <sub>f</sub> =16.2 min), <b>1b</b> ( <i>R</i> <sub>f</sub> =18.8 min) on chiral Daicel Chiralpack AD-H column (250 × 4.6 mm, 5 μm) under the HPLC condition of n-hexane/ isopropanol (75:25) solution.                                    | 11 |
| Figure S2  | Calculated and experimental ECD spectra of compounds <b>1a</b> and <b>1b</b> .                                                                                                                                                                                                                        | 11 |
| Figure S3  | The LC-CD analysis figure of compounds <b>2a</b> ( <i>R</i> <sub>f</sub> =9.2 min), <b>2b</b> ( <i>R</i> <sub>f</sub> =13.5 min) on chiral Daicel Chiralpack AD-H column (250 × 4.6 mm, 5 μm) under the HPLC condition of n-hexane/ isopropanol (65:35) solution.                                     | 12 |
| Figure S4  | Calculated and experimental ECD spectra of compounds <b>2a</b> and <b>2b</b> .                                                                                                                                                                                                                        | 12 |
| Figure S5  | The LC-CD analysis figure of compounds <b>3a</b> ( <i>R</i> <sub>f</sub> =13.1 min), <b>3b</b> ( <i>R</i> <sub>f</sub> =17.6 min) on chiral Daicel Chiralpack AD-H column (250 × 4.6 mm, 5 μm) under the HPLC condition of n-hexane/ isopropanol (90:10) solution.                                    | 13 |
| Figure S6  | Calculated and experimental ECD spectra of compounds <b>3a</b> and <b>3b</b> .                                                                                                                                                                                                                        | 13 |
| Figure S7  | The LC-CD analysis figure of compounds <b>4a</b> ( <i>R</i> <sub>f</sub> =6.8 min), <b>4b</b> ( <i>R</i> <sub>f</sub> =9.6 min) on chiral Daicel Chiralpack AD-H column (250 × 4.6 mm, 5 μm) under the HPLC condition of n-hexane/ isopropanol (65:35) solution.                                      | 14 |
| Figure S8  | Calculated and experimental ECD spectra of compounds <b>4a</b> and <b>4b</b> .                                                                                                                                                                                                                        | 14 |
| Figure S9  | Detailed DP4+ probability (calculated at PCM/b3lyp/6-311+G(d,p) level) for compounds <b>6</b> and <b>16</b> (Isomer 1: 2 <i>R</i> 6 <i>R</i> 10 <i>R</i> , Isomer 2: 2 <i>R</i> 6 <i>R</i> 10 <i>S</i> , Isomer 3: 2 <i>R</i> 6 <i>S</i> 10 <i>R</i> , Isomer 4: 2 <i>R</i> 6 <i>S</i> 10 <i>S</i> ). | 15 |
| Figure S10 | Calculated and experimental ECD spectra of compounds <b>6</b> and <b>16</b> .                                                                                                                                                                                                                         | 15 |
| Figure S11 | The LC-CD analysis figure of compounds <b>7a</b> ( <i>R</i> <sub>f</sub> =52.2 min), <b>7b</b> ( <i>R</i> <sub>f</sub> =60.5 min) on chiral Daicel Chiralpack AD-H column (250 × 4.6 mm, 5 μm) under the HPLC condition of n-hexane/ isopropanol (90:10) solution.                                    | 16 |
| Figure S12 | Calculated and experimental ECD spectra of compounds <b>7a</b> and <b>7b</b> .                                                                                                                                                                                                                        | 16 |
| Figure S13 | The LC-CD analysis figure of compounds <b>8a</b> ( <i>R</i> <sub>f</sub> =30.6 min), <b>8b</b> ( <i>R</i> <sub>f</sub> =36.2 min) on chiral Daicel Chiralpack AD-H column (250 × 4.6 mm, 5 μm) under the HPLC condition of n-hexane/ isopropanol (90:10) solution.                                    | 17 |
| Figure S14 | Calculated and experimental ECD spectra of compounds <b>8a</b> and <b>8b</b> .                                                                                                                                                                                                                        | 17 |
| Figure S15 | The LC-CD analysis figure of compounds <b>10a</b> ( <i>R</i> <sub>f</sub> =19.8 min), <b>10b</b> ( <i>R</i> <sub>f</sub> =26.6 min) on chiral Daicel Chiralpack AD-H column (250 × 4.6 mm, 5 μm) under the HPLC condition of n-hexane/ isopropanol (90:10) solution.                                  | 18 |
| Figure S16 | Calculated and experimental ECD spectra of compounds <b>10a</b> and <b>10b</b> .                                                                                                                                                                                                                      | 18 |
| Figure S17 | The LC-CD analysis figure of compounds <b>11a</b> ( <i>R</i> <sub>f</sub> =14.9 min), <b>11b</b> ( <i>R</i> <sub>f</sub> =17.8 min) on chiral Daicel Chiralpack AD-H column (250 × 4.6 mm, 5 μm) under                                                                                                | 19 |

|            |                                                                                                                                                                                                                                                       |    |
|------------|-------------------------------------------------------------------------------------------------------------------------------------------------------------------------------------------------------------------------------------------------------|----|
|            | the HPLC condition of n-hexane/ isopropanol (90:10) solution.                                                                                                                                                                                         |    |
| Figure S18 | Calculated and experimental ECD spectra of compounds <b>10a</b> and <b>10b</b> .                                                                                                                                                                      | 19 |
| Figure S19 | The LC-CD analysis figure of compounds <b>12a</b> ( $R_f=8.1$ min), <b>12b</b> ( $R_f=11.8$ min) on chiral Daicel Chiralpack AD-H column ( $250 \times 4.6$ mm, $5 \mu\text{m}$ ) under the HPLC condition of n-hexane/ isopropanol (80:20) solution. | 20 |
| Figure S20 | Calculated and experimental ECD spectra of compounds <b>12a</b> and <b>12b</b> .                                                                                                                                                                      | 20 |
| Figure S21 | SDS PAGE of the ALR2 stability investigation for surface plasmon resonance (SPR) experiment during 0-8h at room temperature.                                                                                                                          | 21 |
| Figure S22 | Compounds <b>2-5</b> and <b>13-15</b> , representative of 5/7/5 tricyclic spogiacidin-type PIA compounds, displayed the superior activities ( $>50\%$ inhibition rate) at $20 \mu\text{M}$ .                                                          | 21 |
| Figure S23 | $\text{IC}_{50}$ values of ALR2 inhibitory activities for spongiacidin-type PIAs (compounds <b>2-5</b> and <b>13-15</b> ).                                                                                                                            | 22 |
| Figure S24 | SPR experiment of compound <b>13</b> using the Biacore T200 instrument.                                                                                                                                                                               | 22 |
| Figure S25 | SPR experiment of compound <b>14</b> using the Biacore T200 instrument.                                                                                                                                                                               | 23 |
| Figure S26 | $^1\text{H}$ NMR spectrum of compound <b>1</b> in $\text{DMSO-}d_6$ (500 MHz).                                                                                                                                                                        | 24 |
| Figure S27 | $^{13}\text{C}$ NMR spectrum of compound <b>1</b> in $\text{DMSO-}d_6$ (125 MHz).                                                                                                                                                                     | 25 |
| Figure S28 | $^{13}\text{C}$ NMR and DEPT spectrum of compound <b>1</b> in $\text{DMSO-}d_6$ (125 MHz).                                                                                                                                                            | 26 |
| Figure S29 | $^1\text{H-}^1\text{H}$ COSY spectrum of compound <b>1</b> in $\text{DMSO-}d_6$ (500 MHz).                                                                                                                                                            | 27 |
| Figure S30 | HSQC spectrum of compound <b>1</b> in $\text{DMSO-}d_6$ (500 MHz).                                                                                                                                                                                    | 28 |
| Figure S31 | HMBC spectrum of compound <b>1</b> in $\text{DMSO-}d_6$ (500 MHz).                                                                                                                                                                                    | 29 |
| Figure S32 | HRESIMS data of compound <b>1</b> .                                                                                                                                                                                                                   | 30 |
| Figure S33 | $^1\text{H}$ NMR spectrum of compound <b>2</b> in $\text{DMSO-}d_6$ (500 MHz).                                                                                                                                                                        | 31 |
| Figure S34 | $^{13}\text{C}$ NMR spectrum of compound <b>2</b> in $\text{DMSO-}d_6$ (125 MHz).                                                                                                                                                                     | 32 |
| Figure S35 | $^{13}\text{C}$ NMR and DEPT spectrum of compound <b>2</b> in $\text{DMSO-}d_6$ (125 MHz).                                                                                                                                                            | 33 |
| Figure S36 | $^1\text{H-}^1\text{H}$ COSY spectrum of compound <b>2</b> in $\text{DMSO-}d_6$ (500 MHz).                                                                                                                                                            | 34 |
| Figure S37 | HSQC spectrum of compound <b>2</b> in $\text{DMSO-}d_6$ (500 MHz).                                                                                                                                                                                    | 35 |
| Figure S38 | HMBC spectrum of compound <b>2</b> in $\text{DMSO-}d_6$ (500 MHz).                                                                                                                                                                                    | 36 |
| Figure S39 | HRESIMS data of compound <b>2</b> .                                                                                                                                                                                                                   | 37 |
| Figure S40 | $^1\text{H}$ NMR spectrum of compound <b>3</b> in $\text{DMSO-}d_6$ (500 MHz).                                                                                                                                                                        | 38 |
| Figure S41 | $^{13}\text{C}$ NMR spectrum of compound <b>3</b> in $\text{DMSO-}d_6$ (125 MHz).                                                                                                                                                                     | 39 |
| Figure S42 | $^{13}\text{C}$ NMR and DEPT spectrum of compound <b>3</b> in $\text{DMSO-}d_6$ (125 MHz).                                                                                                                                                            | 40 |
| Figure S43 | $^1\text{H-}^1\text{H}$ COSY spectrum of compound <b>3</b> in $\text{DMSO-}d_6$ (500 MHz).                                                                                                                                                            | 41 |
| Figure S44 | HSQC spectrum of compound <b>3</b> in $\text{DMSO-}d_6$ (500 MHz).                                                                                                                                                                                    | 42 |
| Figure S45 | HMBC spectrum of compound <b>3</b> in $\text{DMSO-}d_6$ (500 MHz).                                                                                                                                                                                    | 43 |
| Figure S46 | HRESIMS data of compound <b>3</b> .                                                                                                                                                                                                                   | 44 |
| Figure S47 | $^1\text{H}$ NMR spectrum of compound <b>4</b> in $\text{DMSO-}d_6$ (500 MHz).                                                                                                                                                                        | 45 |
| Figure S48 | $^{13}\text{C}$ NMR spectrum of compound <b>4</b> in $\text{DMSO-}d_6$ (125 MHz).                                                                                                                                                                     | 46 |
| Figure S49 | $^{13}\text{C}$ NMR and DEPT spectrum of compound <b>4</b> in $\text{DMSO-}d_6$ (125 MHz).                                                                                                                                                            | 47 |
| Figure S50 | $^1\text{H-}^1\text{H}$ COSY spectrum of compound <b>4</b> in $\text{DMSO-}d_6$ (500 MHz).                                                                                                                                                            | 48 |

|            |                                                                                                             |    |
|------------|-------------------------------------------------------------------------------------------------------------|----|
| Figure S51 | HSQC spectrum of compound <b>4</b> in DMSO- <i>d</i> <sub>6</sub> (500 MHz).                                | 49 |
| Figure S52 | HMBC spectrum of compound <b>4</b> in DMSO- <i>d</i> <sub>6</sub> (500 MHz).                                | 50 |
| Figure S53 | HRESIMS data of compound <b>4</b> .                                                                         | 51 |
| Figure S54 | <sup>1</sup> H NMR spectrum of compound <b>5</b> in DMSO- <i>d</i> <sub>6</sub> (500 MHz).                  | 52 |
| Figure S55 | <sup>13</sup> C NMR spectrum of compound <b>5</b> in DMSO- <i>d</i> <sub>6</sub> (125 MHz).                 | 53 |
| Figure S56 | <sup>13</sup> C NMR and DEPT spectrum of compound <b>5</b> in DMSO- <i>d</i> <sub>6</sub> (125 MHz).        | 54 |
| Figure S57 | <sup>1</sup> H- <sup>1</sup> H COSY spectrum of compound <b>5</b> in DMSO- <i>d</i> <sub>6</sub> (500 MHz). | 55 |
| Figure S58 | HSQC spectrum of compound <b>5</b> in DMSO- <i>d</i> <sub>6</sub> (500 MHz).                                | 56 |
| Figure S59 | HMBC spectrum of compound <b>5</b> in DMSO- <i>d</i> <sub>6</sub> (500 MHz).                                | 57 |
| Figure S60 | HRESIMS data of compound <b>5</b> .                                                                         | 58 |
| Figure S61 | <sup>1</sup> H NMR spectrum of compound <b>6</b> in DMSO- <i>d</i> <sub>6</sub> (500 MHz).                  | 59 |
| Figure S62 | <sup>13</sup> C NMR spectrum of compound <b>6</b> in DMSO- <i>d</i> <sub>6</sub> (125 MHz).                 | 60 |
| Figure S63 | <sup>13</sup> C NMR and DEPT spectrum of compound <b>6</b> in DMSO- <i>d</i> <sub>6</sub> (125 MHz).        | 61 |
| Figure S64 | <sup>1</sup> H- <sup>1</sup> H COSY spectrum of compound <b>6</b> in DMSO- <i>d</i> <sub>6</sub> (500 MHz). | 62 |
| Figure S65 | HSQC spectrum of compound <b>6</b> in DMSO- <i>d</i> <sub>6</sub> (500 MHz).                                | 63 |
| Figure S66 | HMBC spectrum of compound <b>6</b> in DMSO- <i>d</i> <sub>6</sub> (500 MHz).                                | 64 |
| Figure S67 | HRESIMS data of compound <b>6</b> .                                                                         | 65 |
| Figure S68 | <sup>1</sup> H NMR spectrum of compound <b>7</b> in DMSO- <i>d</i> <sub>6</sub> (500 MHz).                  | 66 |
| Figure S69 | <sup>13</sup> C NMR spectrum of compound <b>7</b> in DMSO- <i>d</i> <sub>6</sub> (125 MHz).                 | 67 |
| Figure S70 | <sup>13</sup> C NMR and DEPT spectrum of compound <b>7</b> in DMSO- <i>d</i> <sub>6</sub> (125 MHz).        | 68 |
| Figure S71 | <sup>1</sup> H- <sup>1</sup> H COSY spectrum of compound <b>7</b> in DMSO- <i>d</i> <sub>6</sub> (500 MHz). | 69 |
| Figure S72 | HSQC spectrum of compound <b>7</b> in DMSO- <i>d</i> <sub>6</sub> (500 MHz).                                | 70 |
| Figure S73 | HMBC spectrum of compound <b>7</b> in DMSO- <i>d</i> <sub>6</sub> (500 MHz).                                | 71 |
| Figure S74 | HRESIMS data of compound <b>7</b> .                                                                         | 72 |
| Figure S75 | <sup>1</sup> H NMR spectrum of compound <b>8</b> in DMSO- <i>d</i> <sub>6</sub> (500 MHz).                  | 73 |
| Figure S76 | <sup>13</sup> C NMR spectrum of compound <b>8</b> in DMSO- <i>d</i> <sub>6</sub> (125 MHz).                 | 74 |
| Figure S77 | <sup>13</sup> C NMR and DEPT spectrum of compound <b>8</b> in DMSO- <i>d</i> <sub>6</sub> (125 MHz).        | 75 |
| Figure S78 | <sup>1</sup> H- <sup>1</sup> H COSY spectrum of compound <b>8</b> in DMSO- <i>d</i> <sub>6</sub> (500 MHz). | 76 |
| Figure S79 | HSQC spectrum of compound <b>8</b> in DMSO- <i>d</i> <sub>6</sub> (500 MHz).                                | 77 |
| Figure S80 | HMBC spectrum of compound <b>8</b> in DMSO- <i>d</i> <sub>6</sub> (500 MHz).                                | 78 |
| Figure S81 | HRESIMS data of compound <b>8</b> .                                                                         | 79 |
| Figure S82 | <sup>1</sup> H NMR spectrum of compound <b>9</b> in DMSO- <i>d</i> <sub>6</sub> (500 MHz).                  | 80 |
| Figure S83 | <sup>13</sup> C NMR spectrum of compound <b>9</b> in DMSO- <i>d</i> <sub>6</sub> (125 MHz).                 | 81 |
| Figure S84 | <sup>13</sup> C NMR and DEPT spectrum of compound <b>9</b> in DMSO- <i>d</i> <sub>6</sub> (125 MHz).        | 82 |
| Figure S85 | <sup>1</sup> H- <sup>1</sup> H COSY spectrum of compound <b>9</b> in DMSO- <i>d</i> <sub>6</sub> (500 MHz). | 83 |
| Figure S86 | HSQC spectrum of compound <b>9</b> in DMSO- <i>d</i> <sub>6</sub> (500 MHz).                                | 84 |
| Figure S87 | HMBC spectrum of compound <b>9</b> in DMSO- <i>d</i> <sub>6</sub> (500 MHz).                                | 85 |
| Figure S88 | HRESIMS data of compound <b>9</b> .                                                                         | 86 |
| Figure S89 | <sup>1</sup> H NMR spectrum of compound <b>10</b> in DMSO- <i>d</i> <sub>6</sub> (500 MHz).                 | 87 |
| Figure S90 | <sup>13</sup> C NMR spectrum of compound <b>10</b> in DMSO- <i>d</i> <sub>6</sub> (125 MHz).                | 88 |

|             |                                                                                           |     |
|-------------|-------------------------------------------------------------------------------------------|-----|
| Figure S91  | $^{13}\text{C}$ NMR and DEPT spectrum of compound <b>10</b> in DMSO- $d_6$ (125 MHz).     | 89  |
| Figure S92  | $^1\text{H}$ - $^1\text{H}$ COSY spectrum of compound <b>10</b> in DMSO- $d_6$ (500 MHz). | 90  |
| Figure S93  | HSQC spectrum of compound <b>10</b> in DMSO- $d_6$ (500 MHz).                             | 91  |
| Figure S94  | HMBC spectrum of compound <b>10</b> in DMSO- $d_6$ (500 MHz).                             | 92  |
| Figure S95  | HRESIMS data of compound <b>10</b> .                                                      | 93  |
| Figure S96  | $^1\text{H}$ NMR spectrum of compound <b>11</b> in DMSO- $d_6$ (500 MHz).                 | 94  |
| Figure S97  | $^{13}\text{C}$ NMR spectrum of compound <b>11</b> in DMSO- $d_6$ (125 MHz).              | 95  |
| Figure S98  | $^{13}\text{C}$ NMR and DEPT spectrum of compound <b>11</b> in DMSO- $d_6$ (125 MHz).     | 96  |
| Figure S99  | $^1\text{H}$ - $^1\text{H}$ COSY spectrum of compound <b>11</b> in DMSO- $d_6$ (500 MHz). | 97  |
| Figure S100 | HSQC spectrum of compound <b>11</b> in DMSO- $d_6$ (500 MHz).                             | 98  |
| Figure S101 | HMBC spectrum of compound <b>11</b> in DMSO- $d_6$ (500 MHz).                             | 99  |
| Figure S102 | HRESIMS data of compound <b>11</b> .                                                      | 100 |
| Figure S103 | $^1\text{H}$ NMR spectrum of compound <b>12</b> in DMSO- $d_6$ (500 MHz).                 | 101 |
| Figure S104 | $^{13}\text{C}$ NMR spectrum of compound <b>12</b> in DMSO- $d_6$ (125 MHz).              | 102 |
| Figure S105 | $^{13}\text{C}$ NMR and DEPT spectrum of compound <b>12</b> in DMSO- $d_6$ (125 MHz).     | 103 |
| Figure S106 | $^1\text{H}$ - $^1\text{H}$ COSY spectrum of compound <b>12</b> in DMSO- $d_6$ (500 MHz). | 104 |
| Figure S107 | HSQC spectrum of compound <b>12</b> in DMSO- $d_6$ (500 MHz).                             | 105 |
| Figure S108 | HMBC spectrum of compound <b>12</b> in DMSO- $d_6$ (500 MHz).                             | 106 |
| Figure S109 | HRESIMS data of compound <b>12</b> .                                                      | 107 |
| Figure S110 | $^1\text{H}$ NMR spectrum of compound <b>13</b> in DMSO- $d_6$ (500 MHz).                 | 108 |
| Figure S111 | $^{13}\text{C}$ NMR spectrum of compound <b>13</b> in DMSO- $d_6$ (125 MHz).              | 109 |
| Figure S112 | $^1\text{H}$ NMR spectrum of compound <b>14</b> in DMSO- $d_6$ (500 MHz).                 | 110 |
| Figure S113 | $^{13}\text{C}$ NMR spectrum of compound <b>14</b> in DMSO- $d_6$ (125 MHz).              | 111 |
| Figure S114 | $^1\text{H}$ NMR spectrum of compound <b>15</b> in DMSO- $d_6$ (500 MHz).                 | 112 |
| Figure S115 | $^{13}\text{C}$ NMR spectrum of compound <b>15</b> in DMSO- $d_6$ (125 MHz).              | 113 |
| Figure S116 | $^1\text{H}$ NMR spectrum of compound <b>16</b> in DMSO- $d_6$ (500 MHz).                 | 114 |
| Figure S117 | $^{13}\text{C}$ NMR spectrum of compound <b>16</b> in DMSO- $d_6$ (125 MHz).              | 115 |

**Table S1.**  $^{13}\text{C}$  (125 MHz) NMR Data for **1–5** and **13–14** acquired in  $\text{DMSO-}d_6$ .

| no. | <b>1</b>            | <b>2</b>            | <b>3</b>            | <b>4</b>            | <b>5</b>            | <b>13</b>           | <b>14</b>           |
|-----|---------------------|---------------------|---------------------|---------------------|---------------------|---------------------|---------------------|
|     | $\delta_c$ , type   |
| 2   | 104.3, C            | 122.7, CH           | 122.0, CH           | 122.6, CH           | 122.4, CH           | 122.6, CH           | 120.4, CH           |
| 3   | 108.5, CH           | 110.0, CH           | 110.2, CH           | 107.2, CH           | 110.4, CH           | 109.6, CH           | 112.6, CH           |
| 4   | 123.3, C            | 117.8, C            | 118.7, C            | 121.9, C            | 120.4, C            | 120.4, C            | 118.6, C            |
| 5   | 127.9, C            | 126.5, C            | 125.3, C            | 123.6, C            | 126.6, C            | 126.6, C            | 126.1, C            |
| 6   | 162.1, C            | 162.9, C            | 163.3, C            | 163.4, C            | 163.0, C            | 163.0, C            | 163.9, C            |
| 8   | 37.4, $\text{CH}_2$ | 45.4, $\text{CH}_2$ | 45.6, $\text{CH}_2$ | 39.9, $\text{CH}_2$ | 39.0, $\text{CH}_2$ | 39.1, $\text{CH}_2$ | 38.3, $\text{CH}_2$ |
| 9   | 125.0, CH           | 62.8, CH            | 63.4, CH            | 126.7, CH           | 31.5, $\text{CH}_2$ | 31.4, $\text{CH}_2$ | 36.6, $\text{CH}_2$ |
| 10  | 133.6, C            | 132.0, C            | 125.7, C            | 105.8, C            | 132.0, C            | 129.6, C            | 130.5, C            |
| 11  | 57.2, CH            | 122.4, C            | 124.7, C            | 53.3, CH            | 122.4, C            | 121.0, C            | 122.3, C            |
| 12  | 170.5, C            | 163.9, C            | 165.2, C            | 171.2, C            | 163.0, C            | 164.4, C            | 161.2, C            |
| 14  | 156.4, C            | 155.4, C            | 154.4, C            | 152.3, C            | 154.7, C            | 154.9, C            | 153.4, C            |

**Table S2.**  $^1\text{H}$  (500 MHz) NMR Data for **1–5** and **13–14** acquired in  $\text{DMSO-}d_6$ .

| no.    | <b>1</b>                         | <b>2</b>                         | <b>3</b>                         | <b>4</b>                         | <b>5</b>                         | <b>13</b>                        | <b>14</b>                        |
|--------|----------------------------------|----------------------------------|----------------------------------|----------------------------------|----------------------------------|----------------------------------|----------------------------------|
|        | $\delta_{\text{H}}$ ( $J$ in Hz) |
| 1-NH   | 12.71, brs                       | 12.05, brs                       | 11.75, brs                       | 11.79, s                         | 12.05, brs                       | 12.10, brs                       | 11.90, brs                       |
| 2      |                                  | 7.09, t (2.8)                    | 6.96, t (2.8)                    | 7.00, t (3.5)                    | 7.09, t (2.3)                    | 7.13, t (2.4)                    | 6.91, t (2.3)                    |
| 3      | 6.36, d (2.3)                    | 6.45, t (2.4)                    | 6.43, t (2.5)                    | 6.44, t (3.1)                    | 6.71, m                          | 6.50, t (2.4)                    | 6.79, t (2.2)                    |
| 4      |                                  |                                  |                                  |                                  |                                  |                                  |                                  |
| 5      |                                  |                                  |                                  |                                  |                                  |                                  |                                  |
| 6      |                                  |                                  |                                  |                                  |                                  |                                  |                                  |
| 7-NH   | 7.79, t (4.7)                    | 7.75, dd (5.5, 3.9)              | 7.59, t (4.3)                    | 7.83, t (5.0)                    | 8.03, t (4.5)                    | 8.05, t (4.3)                    | 7.98, t (4.3)                    |
| 8      | 3.42, m                          | 3.29, m; 3.24, dq (14.3, 2.1)    | 3.26, m; 3.19, m                 | 3.69, 3.60, dd (15.5, 5.0)       | 3.28, m                          | 3.28, m                          | 3.26, q (4.5)                    |
| 9      | 6.04, t (6.8)                    | 5.80, dd (7.4, 2.0)              | 5.83, d (6.6)                    |                                  | 3.34, m                          | 3.28, m                          | 2.85, q (4.5)                    |
| 10     |                                  |                                  |                                  |                                  |                                  |                                  |                                  |
| 11     | 5.21, d (8.5)                    |                                  |                                  | 4.97, d (3.6)                    |                                  |                                  |                                  |
| 12     |                                  |                                  |                                  |                                  |                                  |                                  |                                  |
| 13-NH  |                                  |                                  | 11.16, s                         |                                  |                                  |                                  |                                  |
| 14     |                                  |                                  |                                  |                                  |                                  |                                  |                                  |
| 15-NH  | 7.80, d (8.3)                    |                                  | 9.45, s                          | 8.90, brs                        |                                  |                                  |                                  |
| 16-NH  |                                  |                                  |                                  | 8.12, brs                        |                                  |                                  | 9.23, brs                        |
| 13-NMe |                                  |                                  |                                  |                                  | 3.11, s                          |                                  |                                  |
| 9-OH   |                                  |                                  | 4.99, brs                        | 10.89, brs                       |                                  |                                  |                                  |

**Table S3.**  $^{13}\text{C}$  (125 MHz) NMR Data for **6-12** acquired in  $\text{DMSO-}d_6$ .

| no.    | <b>6</b>                   | <b>7</b>                   | <b>8</b>                   | <b>9</b>                   | <b>10</b>                  | <b>11</b>                  | <b>12</b>                  |
|--------|----------------------------|----------------------------|----------------------------|----------------------------|----------------------------|----------------------------|----------------------------|
|        | $\delta_{\text{C}}$ , type |
| 2      | 89.7, C                    | 121.5, CH                  | 103.6, C                   | 104.0, C                   | 167.0, C                   | 166.0, C                   | 167.0, C                   |
| 3      | 144.2, CH                  | 110.0, CH                  | 112.1, CH                  | 111.2, CH                  | 121.2, C                   | 120.5, C                   | 121.4, C                   |
| 4      | 120.3, C                   | 122.6, C                   | 123.7, C                   | 121.3, C                   | 144.5, CH                  | 145.9, CH                  | 144.4, CH                  |
| 5      | 163.1, C                   | 122.7, C                   | 124.9, C                   | 127.9, C                   | 92.0, C                    | 91.9, C                    | 91.9, C                    |
| 6      | 63.9, CH                   | 163.1, C                   | 162.0, C                   | 162.2, C                   | 167.5, C                   | 74.1, $\text{CH}_2$        | 165.5, C                   |
| 8      | 156.4, C                   | 38.6, $\text{CH}_2$        | 38.4, $\text{CH}_2$        | 37.4, $\text{CH}_2$        |                            |                            | 35.3, $\text{CH}_2$        |
| 9      |                            | 30.4, $\text{CH}_2$        | 30.3, $\text{CH}_2$        | 134.3, CH                  |                            |                            | 33.2, $\text{CH}_2$        |
| 10     | 81.3, C                    | 43.8, CH                   | 43.4, CH                   | 130.3, CH                  |                            |                            | 171.6, C                   |
| 11     | 39.5, $\text{CH}_2$        | 175.0, C                   | 173.6, C                   | 166.0, C                   |                            |                            |                            |
| 12     | 19.7, $\text{CH}_2$        |                            |                            |                            |                            |                            |                            |
| 13     | 45.0, $\text{CH}_2$        |                            |                            |                            |                            |                            |                            |
| 15     | 161.9, C                   |                            |                            |                            |                            |                            |                            |
| 2-OMe  | 50.6, $\text{CH}_3$        |                            |                            |                            |                            |                            |                            |
| 5-OMe  |                            |                            |                            |                            | 51.1, $\text{CH}_3$        | 49.7, $\text{CH}_3$        | 51.0, $\text{CH}_3$        |
| 6-OMe  |                            |                            |                            |                            |                            | 59.1, $\text{CH}_3$        |                            |
| 10-OMe |                            |                            |                            |                            |                            |                            | 51.4, $\text{CH}_3$        |
| 11-OMe |                            |                            | 52.0, $\text{CH}_3$        | 52.1, $\text{CH}_3$        |                            |                            |                            |

**Table S4.**  $^1\text{H}$  (500 MHz) NMR Data for **6-12** acquired in  $\text{DMSO-}d_6$ .

| no.    | <b>6</b>                      | <b>7</b>                      | <b>8</b>                      | <b>9</b>                      | <b>10</b>                     | <b>11</b>                     | <b>12</b>                     |
|--------|-------------------------------|-------------------------------|-------------------------------|-------------------------------|-------------------------------|-------------------------------|-------------------------------|
|        | $\delta_{\text{H}}$ (J in Hz) |
| 1-NH   |                               | 11.17, brs                    | 12.05, brs                    |                               | 9.07, brs                     | 8.81, brs                     | 9.13, brs                     |
| 2      |                               | 6.83, t (2.7)                 |                               |                               |                               |                               |                               |
| 3      | 7.79, s                       | 6.06, t (2.4)                 | 6.06, s                       | 6.54, s                       |                               |                               |                               |
| 4      |                               |                               |                               |                               | 7.35, s                       | 7.32, d (1.6)                 | 7.31, d (0.9)                 |
| 5      |                               |                               |                               |                               |                               |                               |                               |
| 6      | 5.80, s                       |                               |                               |                               |                               | 3.56, 3.42, d (10.0)          |                               |
| 7-NH   | 9.53, brs                     | 7.65, brs                     | 7.80, t (4.5)                 | 7.83, t (4.9)                 | 7.64, d (15.8)                |                               | 8.31, t (5.9)                 |
| 8      |                               | 3.27, m;                      | 3.22, m; 3.14, m              | 3.50, dd (6.8, 5.3)           |                               |                               | 3.33, m                       |
| 9      | 9.88, brs                     | 2.08, q (6.0)                 | 2.08, q (6.2)                 | 6.91, t (7.0)                 |                               |                               | 2.51, m                       |
| 10     |                               | 3.79, t (6.3)                 | 3.92, t (6.6)                 |                               |                               |                               |                               |
| 11     | 2.25, m                       |                               |                               |                               |                               |                               |                               |
| 12     | 1.98, m                       |                               |                               |                               |                               |                               |                               |
| 13     | 3.47, tt (8.0, 2.7);          |                               |                               |                               |                               |                               |                               |
| 14     |                               |                               |                               |                               |                               |                               |                               |
| 15     |                               |                               |                               |                               |                               |                               |                               |
| 16-NH  | 8.23, brs                     |                               |                               |                               |                               |                               |                               |
| 2-OMe  | 3.15, s                       |                               |                               |                               |                               |                               |                               |
| 5-OMe  |                               |                               |                               |                               | 3.17, s                       | 3.07, s                       | 3.18, s                       |
| 6-OMe  |                               |                               |                               |                               |                               | 3.27, s                       |                               |
| 10-OMe |                               |                               |                               |                               |                               |                               | 3.59, s                       |
| 11-OMe |                               |                               | 3.64, s                       | 3.75, s                       |                               |                               |                               |

**Table S5.** X-ray diffraction analysis of compound **1**.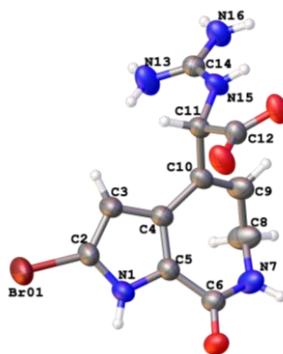

|                                             |                                                                 |
|---------------------------------------------|-----------------------------------------------------------------|
| Empirical formula                           | C <sub>13</sub> H <sub>18</sub> BrN <sub>5</sub> O <sub>4</sub> |
| Formula weight                              | 388.23                                                          |
| Temperature/K                               | 298                                                             |
| Crystal system                              | monoclinic                                                      |
| Space group                                 | P2 <sub>1</sub> /n                                              |
| a/Å                                         | 9.0283(3)                                                       |
| b/Å                                         | 15.5478(3)                                                      |
| c/Å                                         | 11.7424(3)                                                      |
| α/°                                         | 90                                                              |
| β/°                                         | 90.939(2)                                                       |
| γ/°                                         | 90                                                              |
| Volume/Å <sup>3</sup>                       | 1648.06(8)                                                      |
| Z                                           | 4                                                               |
| ρ <sub>calc</sub> /g/cm <sup>3</sup>        | 1.565                                                           |
| μ/mm <sup>-1</sup>                          | 3.656                                                           |
| F(000)                                      | 792.0                                                           |
| Crystal size/mm <sup>3</sup>                | 0.2 × 0.1 × 0.1                                                 |
| Radiation                                   | CuKα (λ = 1.54184)                                              |
| 2θ range for data collection/°              | 9.44 to 152.61                                                  |
| Index ranges                                | -11 ≤ h ≤ 9, -19 ≤ k ≤ 18, -14 ≤ l ≤ 14                         |
| Reflections collected                       | 11402                                                           |
| Independent reflections                     | 3322 [R <sub>int</sub> = 0.0858, R <sub>sigma</sub> = 0.0906]   |
| Data/restraints/parameters                  | 3322/0/210                                                      |
| Goodness-of-fit on F <sup>2</sup>           | 1.077                                                           |
| Final R indexes [I ≥ 2σ (I)]                | R <sub>1</sub> = 0.0556, wR <sub>2</sub> = 0.1518               |
| Final R indexes [all data]                  | R <sub>1</sub> = 0.0886, wR <sub>2</sub> = 0.1736               |
| Largest diff. peak/hole / e Å <sup>-3</sup> | 0.55/-0.79                                                      |



**Table S6.** X-ray diffraction analysis of compound **5**.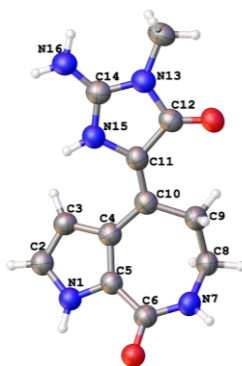

|                                             |                                                                              |
|---------------------------------------------|------------------------------------------------------------------------------|
| Empirical formula                           | C <sub>14</sub> H <sub>16</sub> F <sub>3</sub> N <sub>5</sub> O <sub>5</sub> |
| Formula weight                              | 391.32                                                                       |
| Temperature/K                               | 150.0                                                                        |
| Crystal system                              | monoclinic                                                                   |
| Space group                                 | P2 <sub>1</sub> /n                                                           |
| a/Å                                         | 20.7232(6)                                                                   |
| b/Å                                         | 8.2740(2)                                                                    |
| c/Å                                         | 20.9101(6)                                                                   |
| α/°                                         | 90                                                                           |
| β/°                                         | 117.162(2)                                                                   |
| γ/°                                         | 90                                                                           |
| Volume/Å <sup>3</sup>                       | 3189.93(16)                                                                  |
| Z                                           | 8                                                                            |
| ρ <sub>calc</sub> /g/cm <sup>3</sup>        | 1.630                                                                        |
| μ/mm <sup>-1</sup>                          | 1.291                                                                        |
| F(000)                                      | 1616.0                                                                       |
| Crystal size/mm <sup>3</sup>                | 0.2 × 0.15 × 0.1                                                             |
| Radiation                                   | CuKα (λ = 1.54178)                                                           |
| 2θ range for data collection/°              | 4.974 to 144.002                                                             |
| Index ranges                                | -25 ≤ h ≤ 25, -10 ≤ k ≤ 9, -25 ≤ l ≤ 25                                      |
| Reflections collected                       | 26228                                                                        |
| Independent reflections                     | 6243 [R <sub>int</sub> = 0.0421, R <sub>sigma</sub> = 0.0301]                |
| Data/restraints/parameters                  | 6243/2/495                                                                   |
| Goodness-of-fit on F <sup>2</sup>           | 1.049                                                                        |
| Final R indexes [I ≥ 2σ (I)]                | R <sub>1</sub> = 0.0781, wR <sub>2</sub> = 0.2177                            |
| Final R indexes [all data]                  | R <sub>1</sub> = 0.0866, wR <sub>2</sub> = 0.2296                            |
| Largest diff. peak/hole / e Å <sup>-3</sup> | 0.80/-0.51                                                                   |

**Table S7.** X-ray diffraction analysis of compound **10**.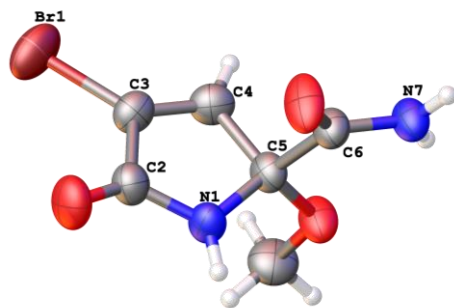

|                                             |                                                               |
|---------------------------------------------|---------------------------------------------------------------|
| Empirical formula                           | C <sub>6</sub> H <sub>7</sub> BrN <sub>2</sub> O <sub>3</sub> |
| Formula weight                              | 235.05                                                        |
| Temperature/K                               | 293(2)                                                        |
| Crystal system                              | monoclinic                                                    |
| Space group                                 | P21/c                                                         |
| a/Å                                         | 9.8547(3)                                                     |
| b/Å                                         | 8.4945(2)                                                     |
| c/Å                                         | 10.1134(3)                                                    |
| α/°                                         | 90                                                            |
| β/°                                         | 92.843(3)                                                     |
| γ/°                                         | 90                                                            |
| Volume/Å <sup>3</sup>                       | 845.56(4)                                                     |
| Z                                           | 4                                                             |
| ρ <sub>calc</sub> /g/cm <sup>3</sup>        | 1.846                                                         |
| μ/mm <sup>-1</sup>                          | 6.435                                                         |
| F(000)                                      | 464.0                                                         |
| Crystal size/mm <sup>3</sup>                | 0.31 × 0.25 × 0.17                                            |
| Radiation                                   | CuKα (λ = 1.54184)                                            |
| 2θ range for data collection/°              | 8.984 to 156.222                                              |
| Index ranges                                | -12 ≤ h ≤ 11, -4 ≤ k ≤ 10, -12 ≤ l ≤ 10                       |
| Reflections collected                       | 5155                                                          |
| Independent reflections                     | 1706 [R <sub>int</sub> = 0.0967, R <sub>sigma</sub> = 0.0604] |
| Data/restraints/parameters                  | 1706/0/110                                                    |
| Goodness-of-fit on F <sup>2</sup>           | 1.026                                                         |
| Final R indexes [I ≥ 2σ (I)]                | R1 = 0.0928, wR2 = 0.2292                                     |
| Final R indexes [all data]                  | R1 = 0.0961, wR2 = 0.2374                                     |
| Largest diff. peak/hole / e Å <sup>-3</sup> | 1.24/-1.86                                                    |

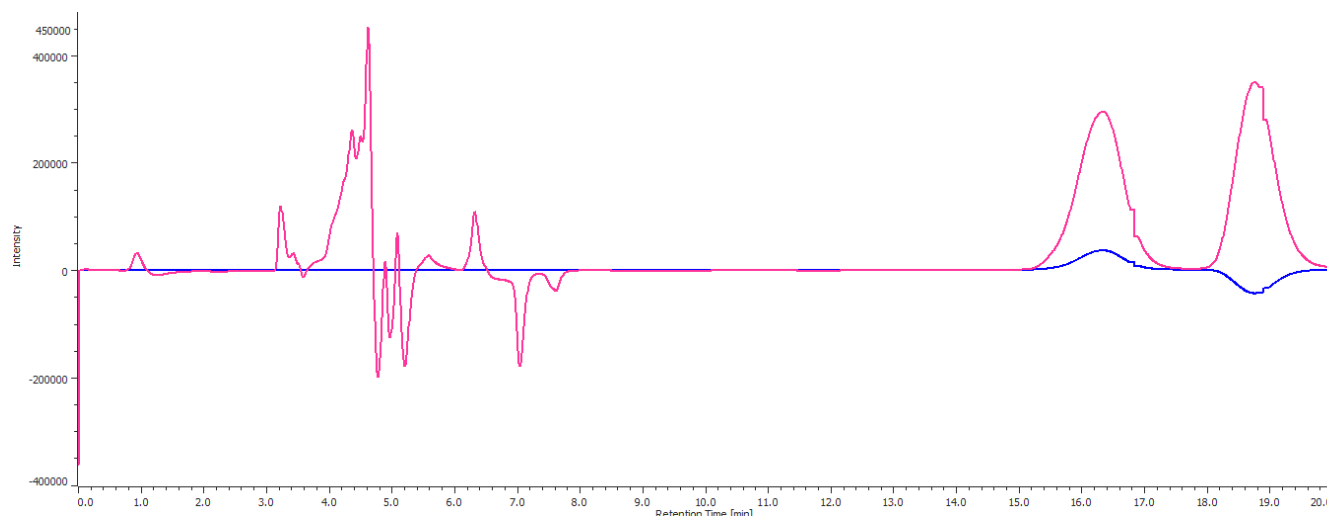

**Figure S1.** The LC-CD analysis figure of compounds **1a** ( $R_f=16.2$  min), **1b** ( $R_f=18.8$  min) on chiral Daicel Chiralpack AD-H column ( $250 \times 4.6$  mm,  $5 \mu\text{m}$ ) under the HPLC condition of n-hexane/ isopropanol (75:25) solution.

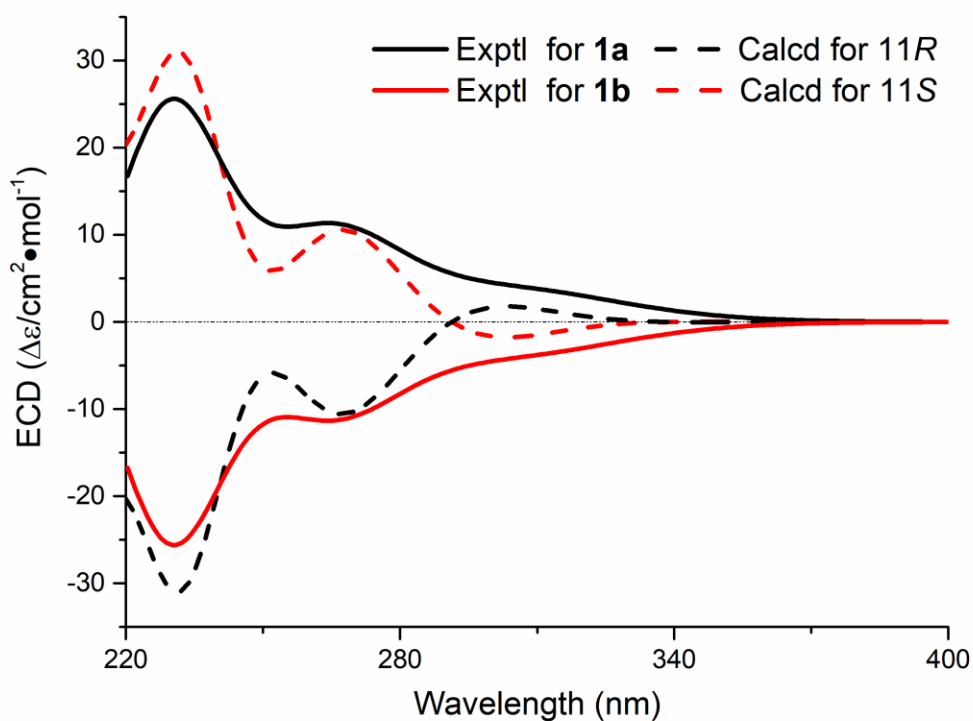

**Figure S2.** Calculated and experimental ECD spectra of compounds **1a** and **1b**.

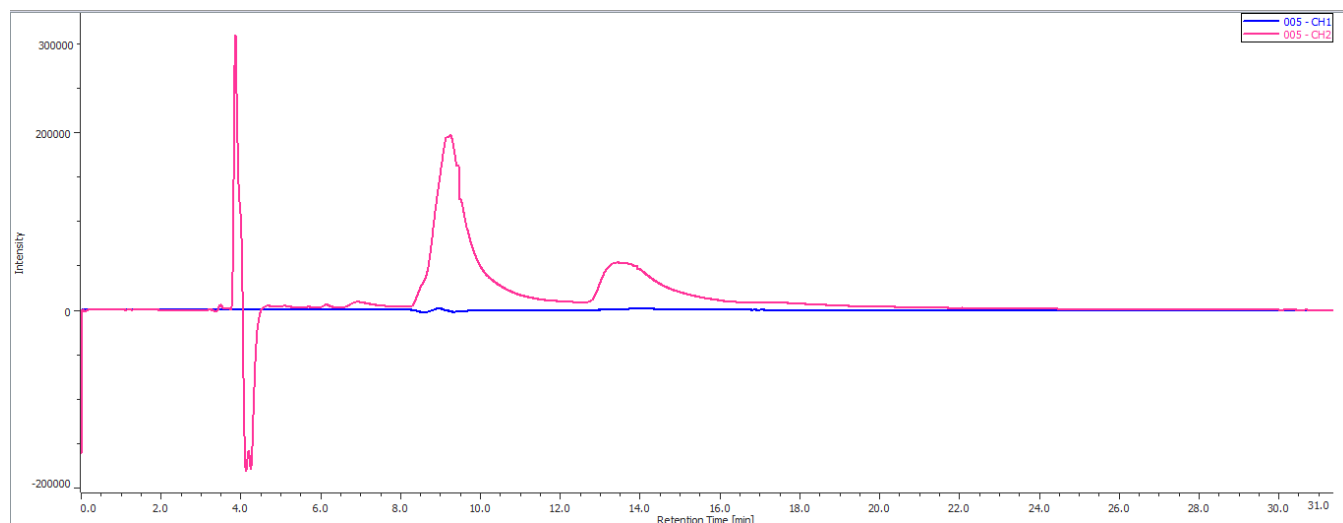

**Figure S3.** The LC-CD analysis figure of compounds **2a** ( $R_f=9.2$  min), **2b** ( $R_f=13.5$  min) on chiral Daicel Chiralpack AD-H column ( $250 \times 4.6$  mm,  $5 \mu\text{m}$ ) under the HPLC condition of n-hexane/ isopropanol (65:35) solution.

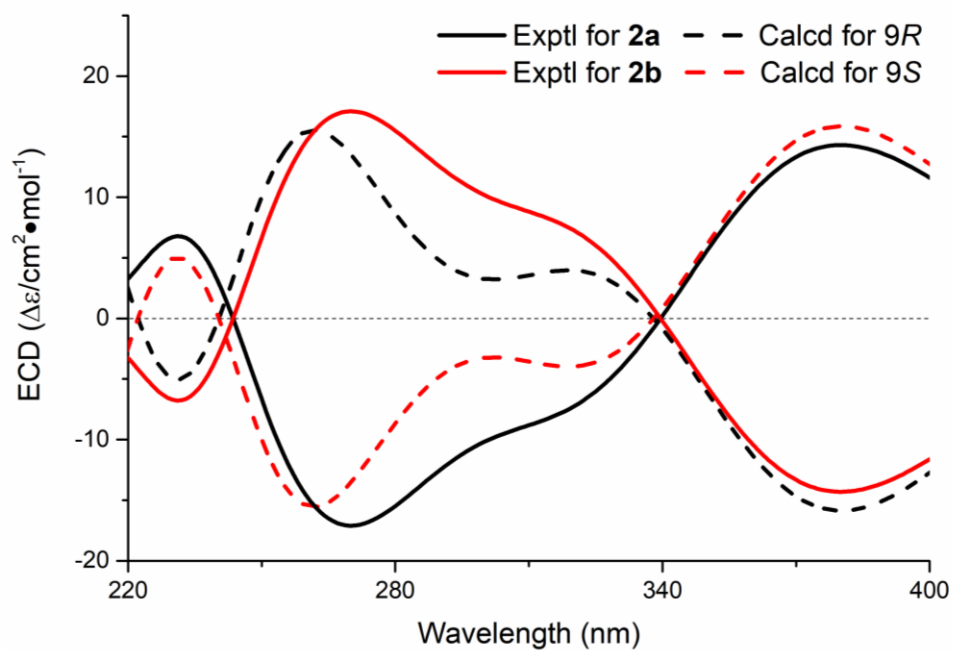

**Figure S4.** Calculated and experimental ECD spectra of compounds **2a** and **2b**.

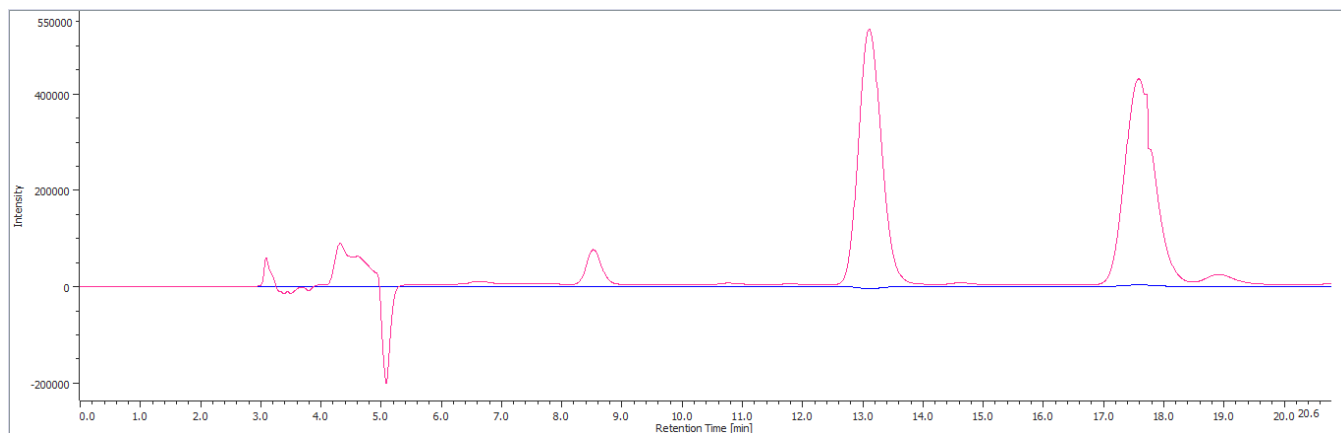

**Figure S5.** The LC-CD analysis figure of compounds **3a** ( $R_f=13.1$  min), **3b** ( $R_f=17.6$  min) on chiral Daicel Chiralpack AD-H column ( $250 \times 4.6$  mm,  $5 \mu\text{m}$ ) under the HPLC condition of n-hexane/ isopropanol (90:10) solution.

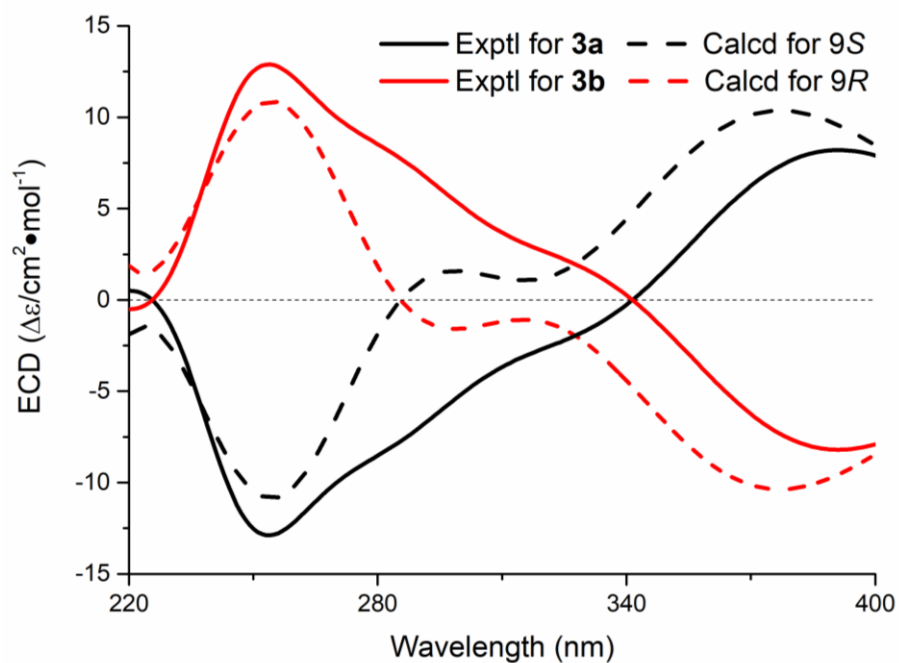

**Figure S6.** Calculated and experimental ECD spectra of compounds **3a** and **3b**.

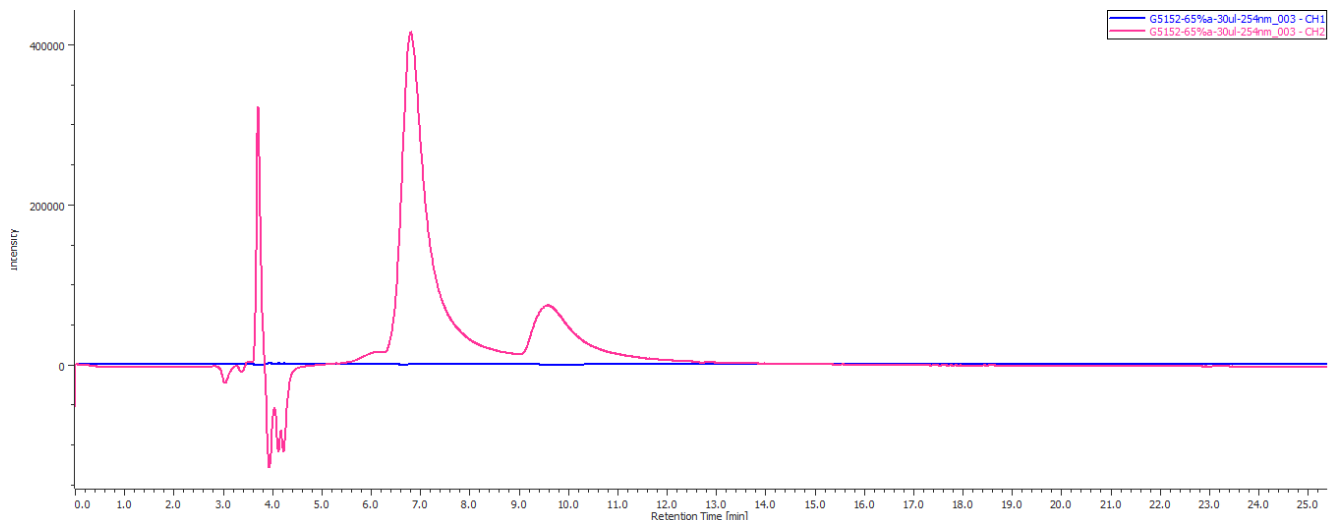

**Figure S7.** The LC-CD analysis figure of compounds **4a** ( $R_f=6.8$  min), **4b** ( $R_f=9.6$  min) on chiral Daicel Chiralpack AD-H column ( $250 \times 4.6$  mm,  $5 \mu\text{m}$ ) under the HPLC condition of n-hexane/ isopropanol (65:35) solution.

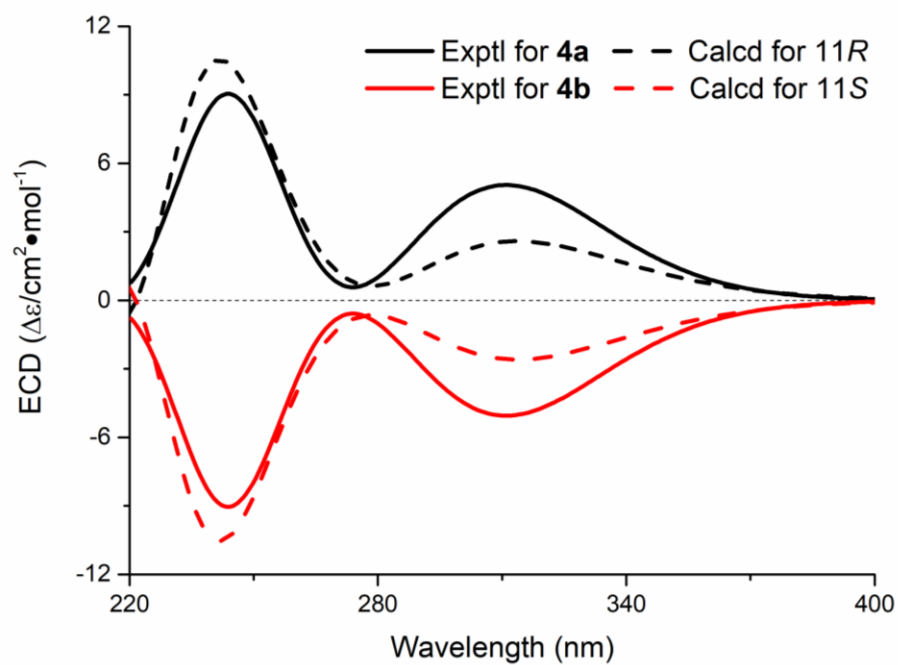

**Figure S8.** Calculated and experimental ECD spectra of compounds **4a** and **4b**.

| Functional<br>B3LYP |                  | Solvent?<br>PCM |          | Basis Set<br>6-311+G (d, p) |          | Type of Data<br>Unscaled Shifts |          |
|---------------------|------------------|-----------------|----------|-----------------------------|----------|---------------------------------|----------|
|                     |                  | DP4+            | 0.00%    | 100.00%                     | 0.00%    | 0.00%                           | -        |
| Nuclei              | sp2?             | Experiment      | Isomer 1 | Isomer 2                    | Isomer 3 | Isomer 4                        | Isomer 5 |
| C                   |                  | 19.7            | 27.59    | 25.50                       | 26.09    | 25.66                           |          |
| C                   |                  | 39.5            | 35.56    | 47.03                       | 42.95    | 37.60                           |          |
| C                   |                  | 45              | 51.41    | 49.54                       | 48.60    | 47.91                           |          |
| C                   |                  | 50.6            | 51.91    | 53.95                       | 56.95    | 53.91                           |          |
| C                   |                  | 63.9            | 79.12    | 70.24                       | 78.50    | 77.12                           |          |
| C                   |                  | 81.3            | 96.07    | 100.50                      | 101.41   | 98.46                           |          |
| C                   |                  | 89.7            | 99.07    | 95.95                       | 94.28    | 100.98                          |          |
| C                   | x                | 120.3           | 146.74   | 146.56                      | 149.06   | 149.78                          |          |
| C                   | x                | 144.2           | 162.61   | 157.12                      | 154.44   | 157.88                          |          |
| C                   | x                | 156.4           | 170.28   | 168.51                      | 168.75   | 171.22                          |          |
| C                   | x                | 161.9           | 185.46   | 172.47                      | 173.68   | 173.31                          |          |
| C                   | x                | 163.1           | 178.53   | 170.58                      | 167.35   | 176.91                          |          |
| H                   |                  | 1.98            | 2.48     | 1.96                        | 1.95     | 0.99                            |          |
| H                   |                  | 1.98            | 1.51     | 2.12                        | 1.95     | 1.54                            |          |
| H                   |                  | 2.25            | 2.12     | 2.01                        | 2.09     | 1.95                            |          |
| H                   |                  | 2.25            | 2.21     | 2.38                        | 2.30     | 2.09                            |          |
| H                   |                  | 3.15            | 3.57     | 3.61                        | 3.51     | 3.35                            |          |
| H                   |                  | 3.35            | 3.99     | 3.53                        | 3.85     | 4.24                            |          |
| H                   |                  | 5.8             | 4.69     | 5.78                        | 5.31     | 5.31                            |          |
| H                   | x                | 7.79            | 7.68     | 7.55                        | 7.82     | 7.58                            |          |
| H                   |                  | 3.15            | 3.39     | 3.42                        | 3.60     | 3.44                            |          |
| A                   | B                | C               | D        | E                           | F        | G                               | H        |
| 1                   | Functional       | Solvent?        |          | Basis Set                   |          | Type of Data                    |          |
| 2                   | B3LYP            | PCM             |          | 6-311+G(d, p)               |          | Unscaled Shifts                 |          |
| 3                   |                  |                 |          |                             |          |                                 |          |
| 4                   |                  |                 | Isomer 1 | Isomer 2                    | Isomer 3 | Isomer 4                        | Isomer 5 |
| 5                   | sDP4+ (H data)   | 0.00%           | 99.93%   | 0.07%                       | 0.00%    | -                               | -        |
| 6                   | sDP4+ (C data)   | 0.70%           | 98.75%   | 0.00%                       | 0.54%    | -                               | -        |
| 7                   | sDP4+ (all data) | 0.00%           | 100.00%  | 0.00%                       | 0.00%    | -                               | -        |
| 8                   | uDP4+ (H data)   | 0.00%           | 83.90%   | 16.10%                      | 0.00%    | -                               | -        |
| 9                   | uDP4+ (C data)   | 0.00%           | 100.00%  | 0.00%                       | 0.00%    | -                               | -        |
| 10                  | uDP4+ (all data) | 0.00%           | 100.00%  | 0.00%                       | 0.00%    | -                               | -        |
| 11                  | DP4+ (H data)    | 0.00%           | 99.99%   | 0.01%                       | 0.00%    | -                               | -        |
| 12                  | DP4+ (C data)    | 0.00%           | 100.00%  | 0.00%                       | 0.00%    | -                               | -        |
| 13                  | DP4+ (all data)  | 0.00%           | 100.00%  | 0.00%                       | 0.00%    | -                               | -        |

**Figure S9.** Detailed DP4+ probability (calculated at PCM/b3lyp/6-311+G(d,p) level) for compounds **6** and **16** (Isomer 1: 2*R*6*R*10*R*, Isomer 2: 2*R*6*R*10*S*, Isomer 3: 2*R*6*S*10*R*, Isomer 4: 2*R*6*S*10*S*).

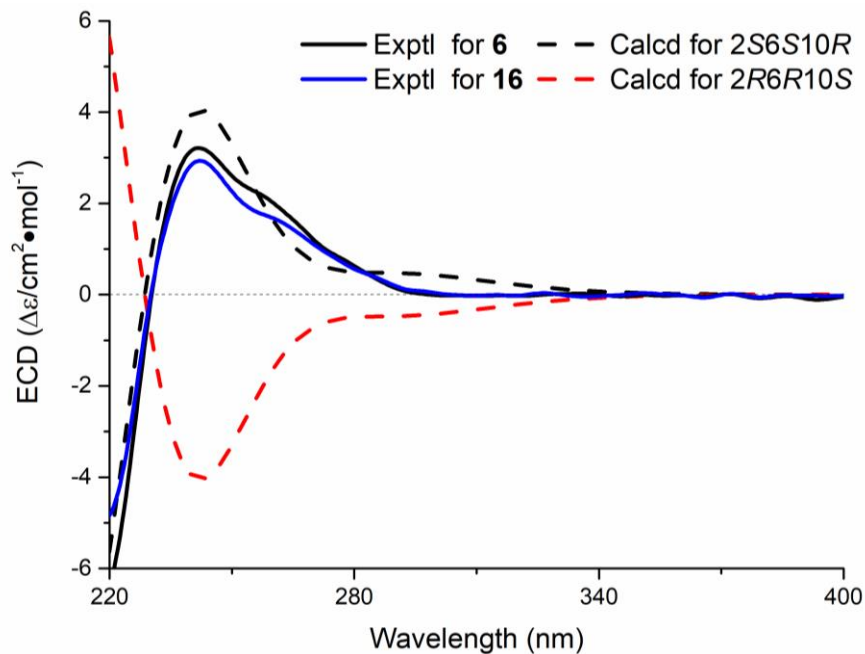

**Figure S10.** Calculated and experimental ECD spectra of compounds **6** and **16**.

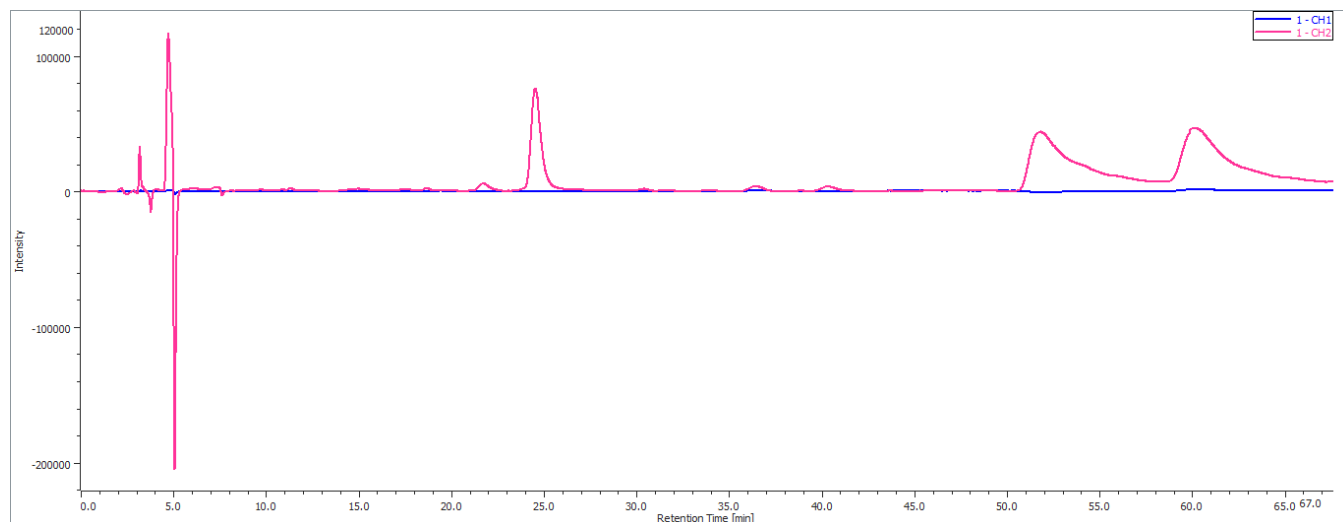

**Figure S11.** The LC-CD analysis figure of compounds **7a** ( $R_f=52.2$  min), **7b** ( $R_f=60.5$  min) on chiral Daicel Chiralpack AD-H column ( $250 \times 4.6$  mm,  $5 \mu\text{m}$ ) under the HPLC condition of n-hexane/isopropanol (90:10) solution.

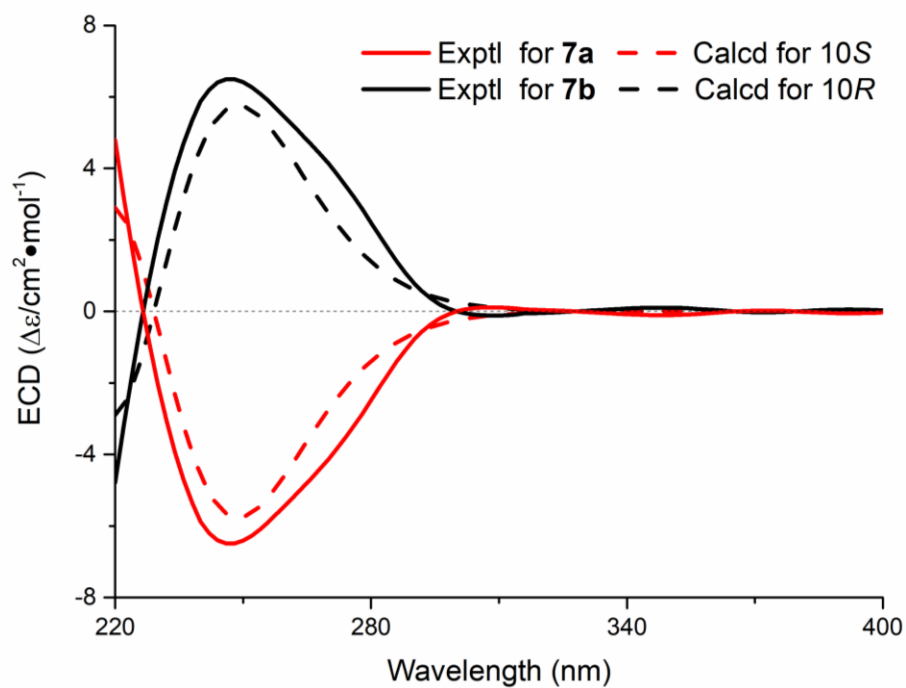

**Figure S12.** Calculated and experimental ECD spectra of compounds **7a** and **7b**.



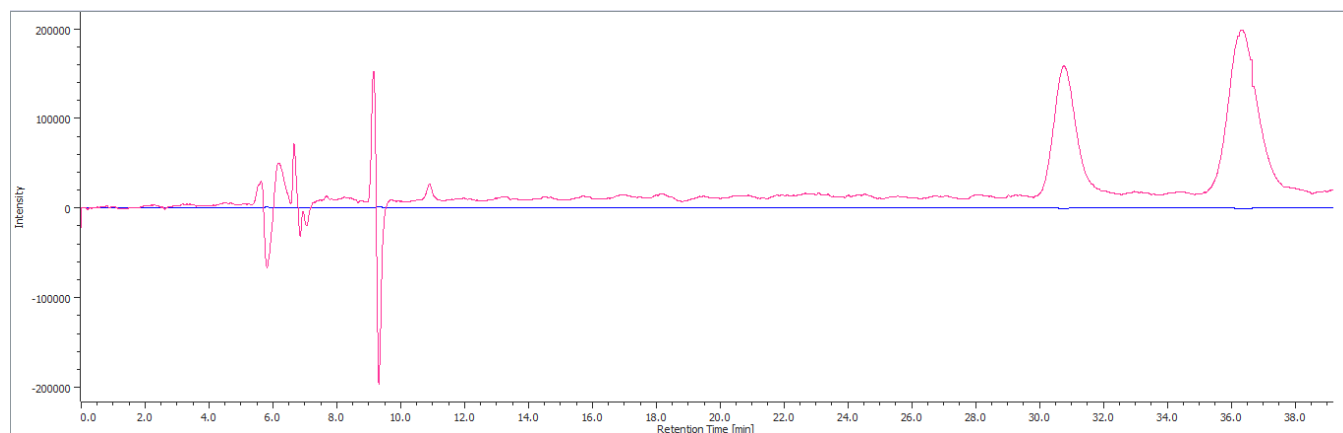

**Figure S13.** The LC-CD analysis figure of compounds **8a** ( $R_f=30.6$  min), **8b** ( $R_f=36.2$  min) on chiral Daicel Chiralpack AD-H column ( $250 \times 4.6$  mm,  $5 \mu\text{m}$ ) under the HPLC condition of n-hexane/isopropanol (90:10) solution.

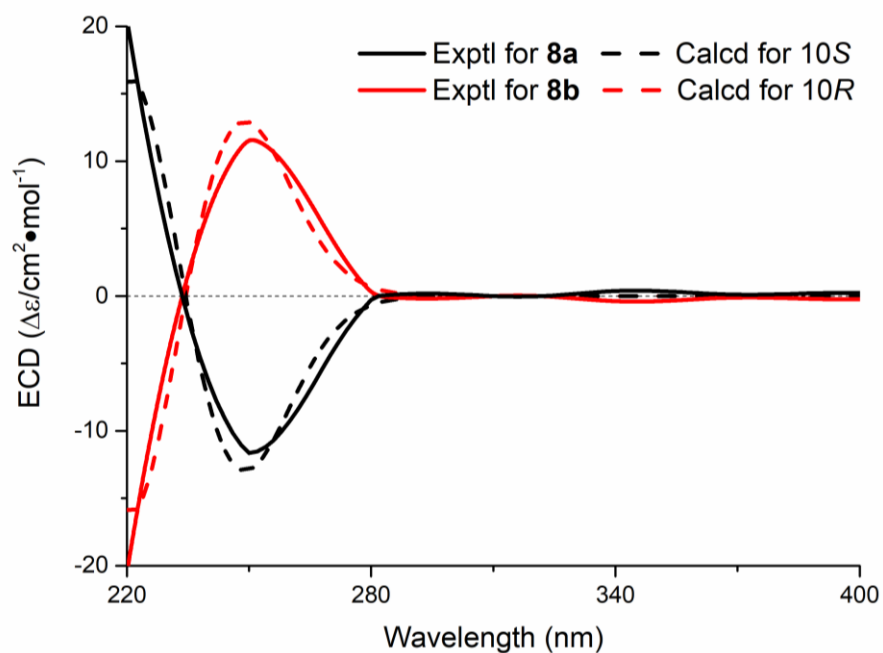

**Figure S14.** Calculated and experimental ECD spectra of compounds **8a** and **8b**.

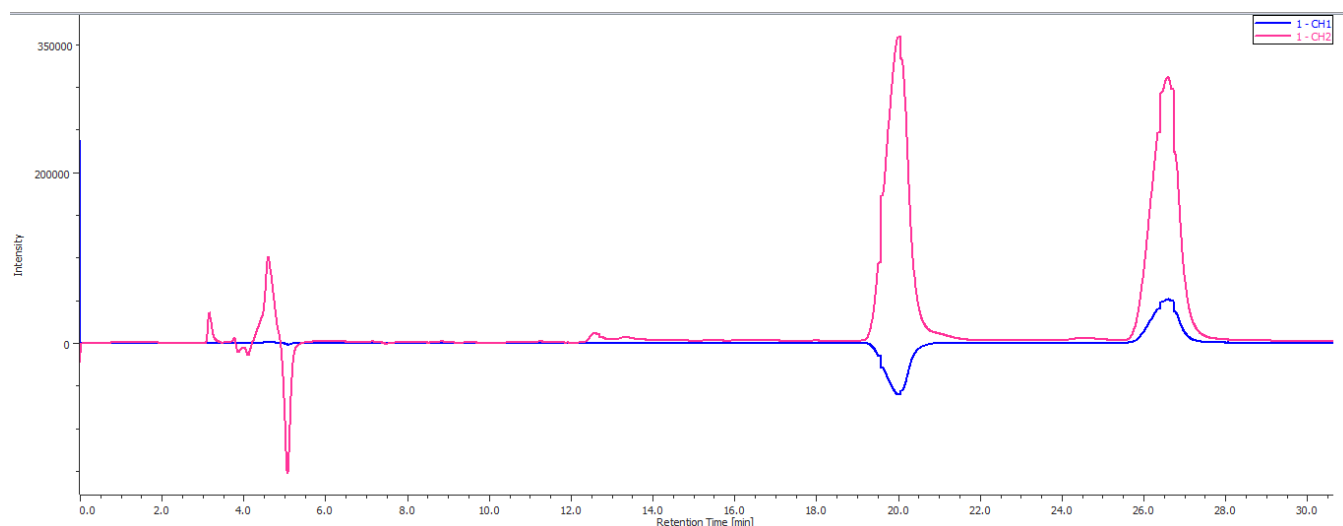

**Figure S15.** The LC-CD analysis figure of compounds **10a** ( $R_f=19.8$  min), **10b** ( $R_f=26.6$  min) on chiral Daicel Chiralpack AD-H column ( $250 \times 4.6$  mm,  $5 \mu\text{m}$ ) under the HPLC condition of n-hexane/isopropanol (90:10) solution.

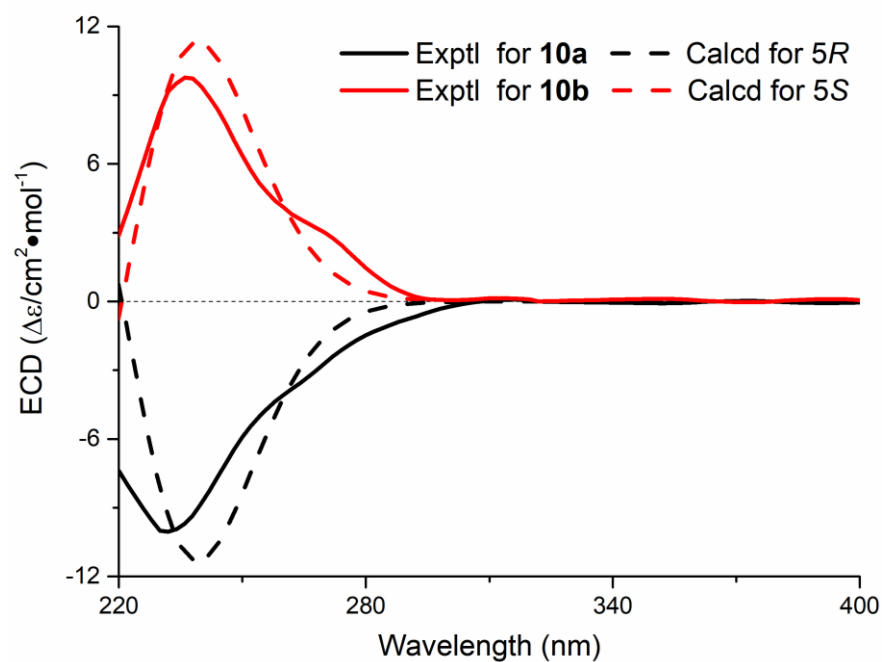

**Figure S16.** Calculated and experimental ECD spectra of compounds **10a** and **10b**.

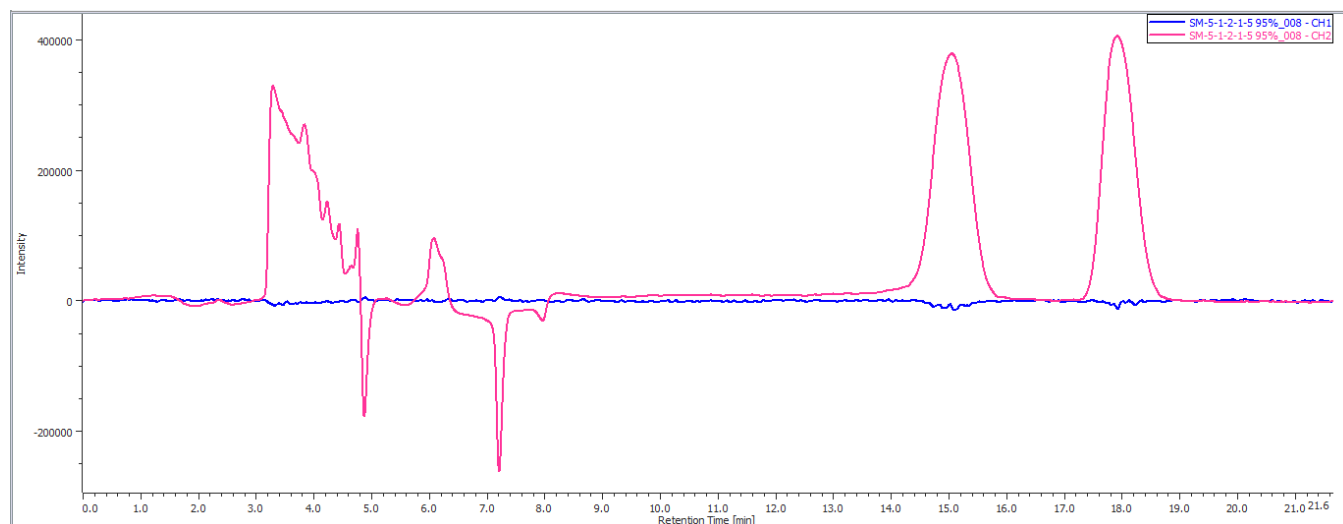

**Figure S17.** The LC-CD analysis figure of compounds **11a** ( $R_f=14.9$  min), **11b** ( $R_f=17.8$  min) on chiral Daicel Chiralpack AD-H column ( $250 \times 4.6$  mm,  $5 \mu\text{m}$ ) under the HPLC condition of n-hexane/isopropanol (90:10) solution.

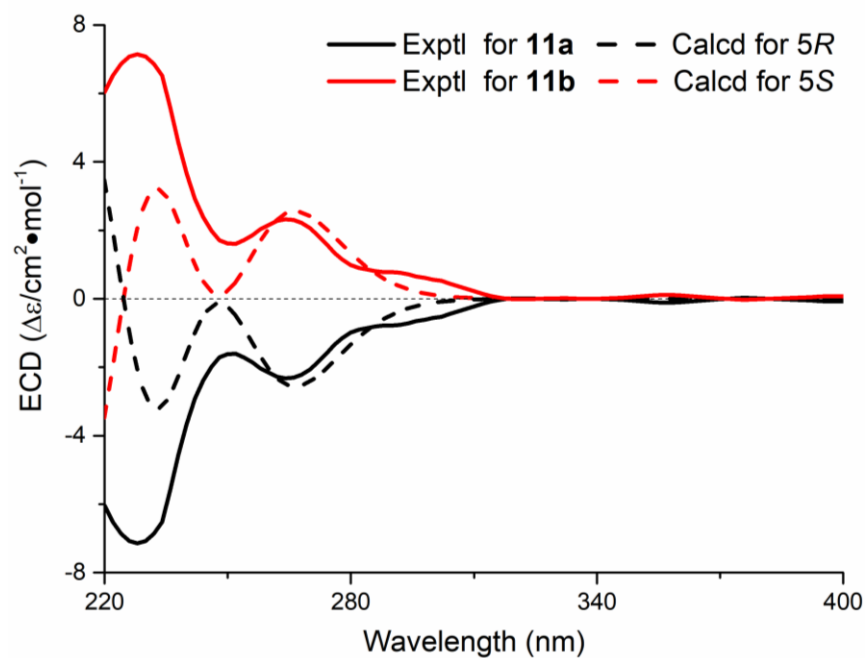

**Figure S18.** Calculated and experimental ECD spectra of compounds **11a** and **11b**.

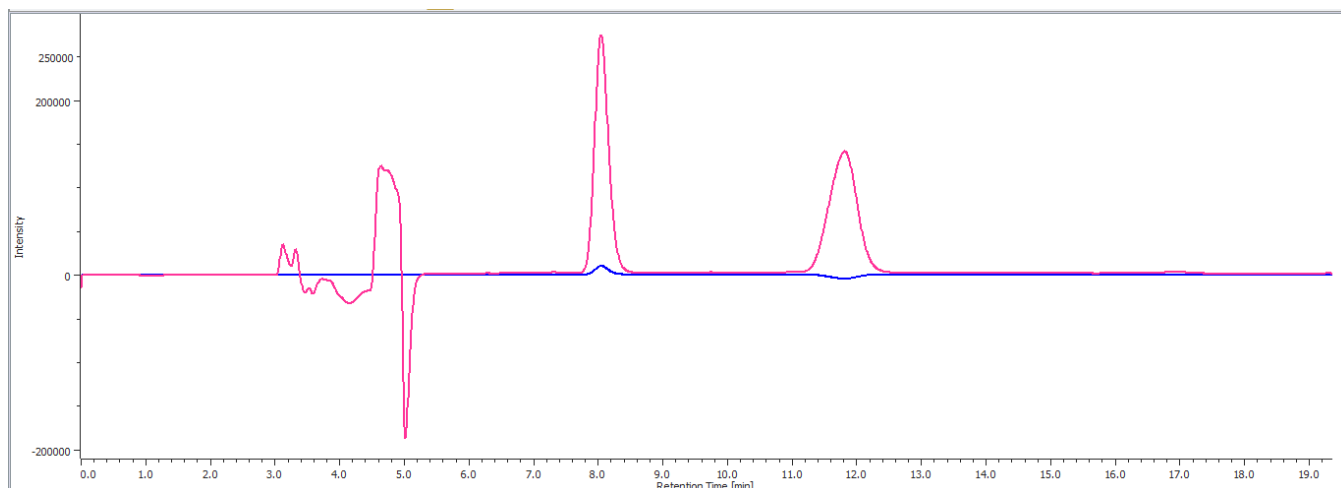

**Figure S19.** The LC-CD analysis figure of compounds **12a** ( $R_f=8.1$  min), **12b** ( $R_f=11.8$  min) on chiral Daicel Chiralpack AD-H column ( $250 \times 4.6$  mm,  $5 \mu\text{m}$ ) under the HPLC condition of n-hexane/isopropanol (80:20) solution.

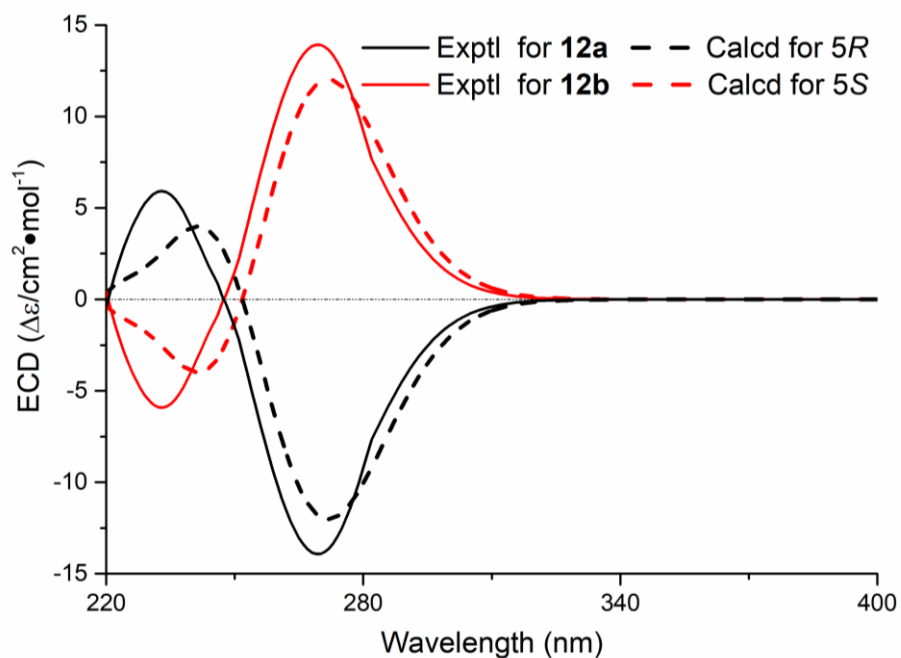

**Figure S20.** Calculated and experimental ECD spectra of compounds **12a** and **12b**.

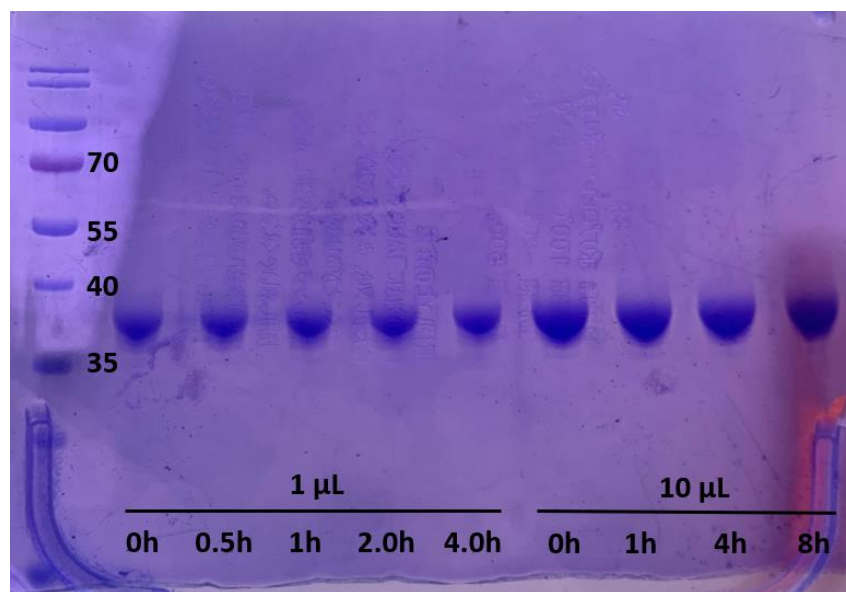

**Figure S21.** SDS PAGE of the ALR2 stability investigation for surface plasmon resonance (SPR) experiment during 0-8h at room temperature.

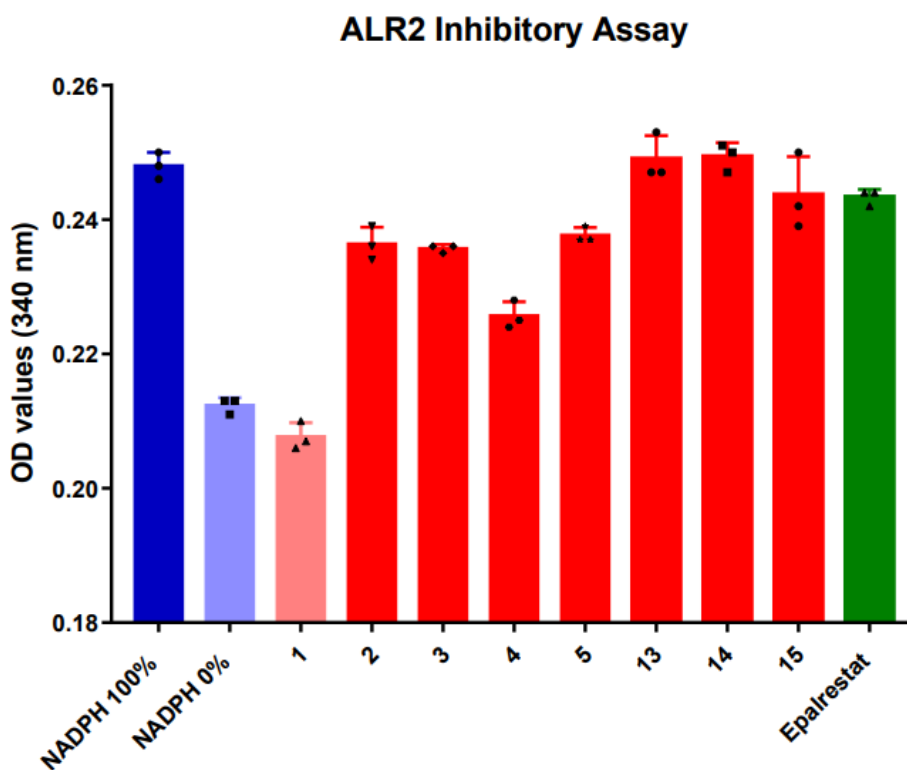

**Figure S22.** Compounds **2-5** and **13-15**, representative of 5/7/5 tricyclic spogiacidin-type PIA compounds, displayed the superior activities (>50% inhibition rate) at 20  $\mu$ M.

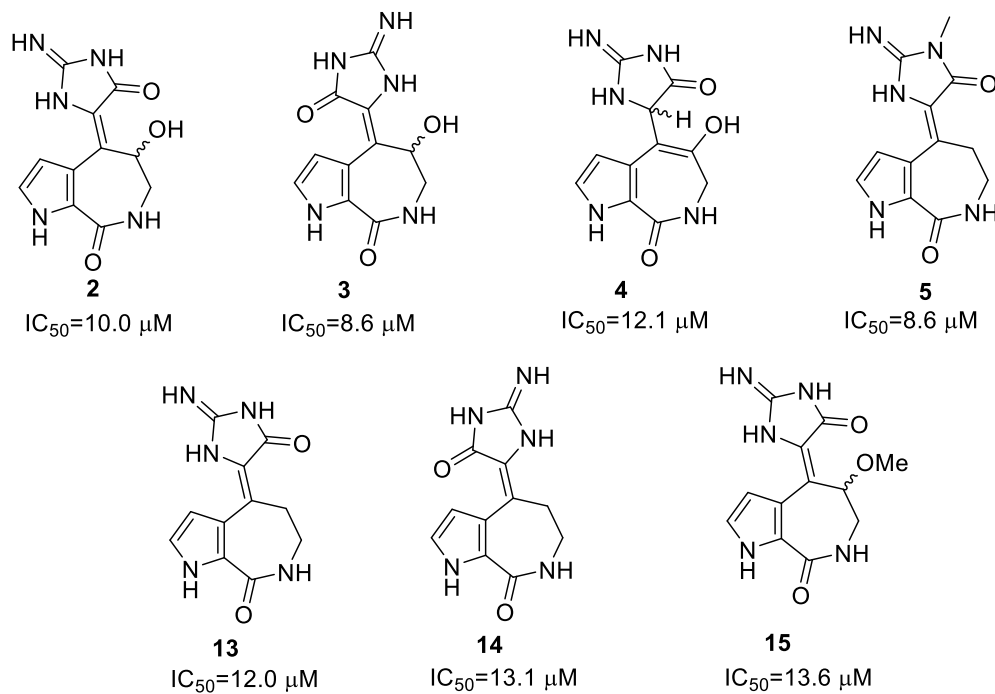

**Figure S23.** IC<sub>50</sub> values of ALR2 inhibitory activities for spongiacidin-type PIAs (compounds **2-5** and **13-15**).

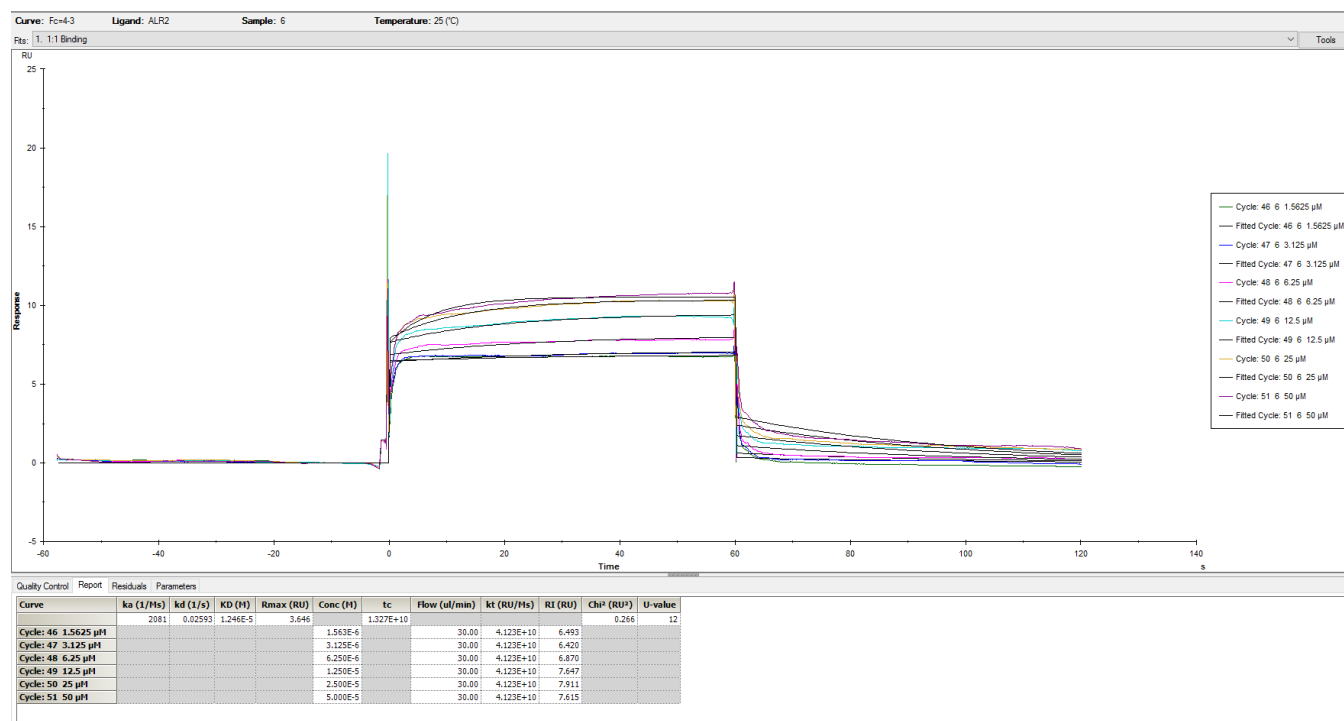

**Figure S24.** SPR experiment of compound **13** using the Biacore T200 instrument.

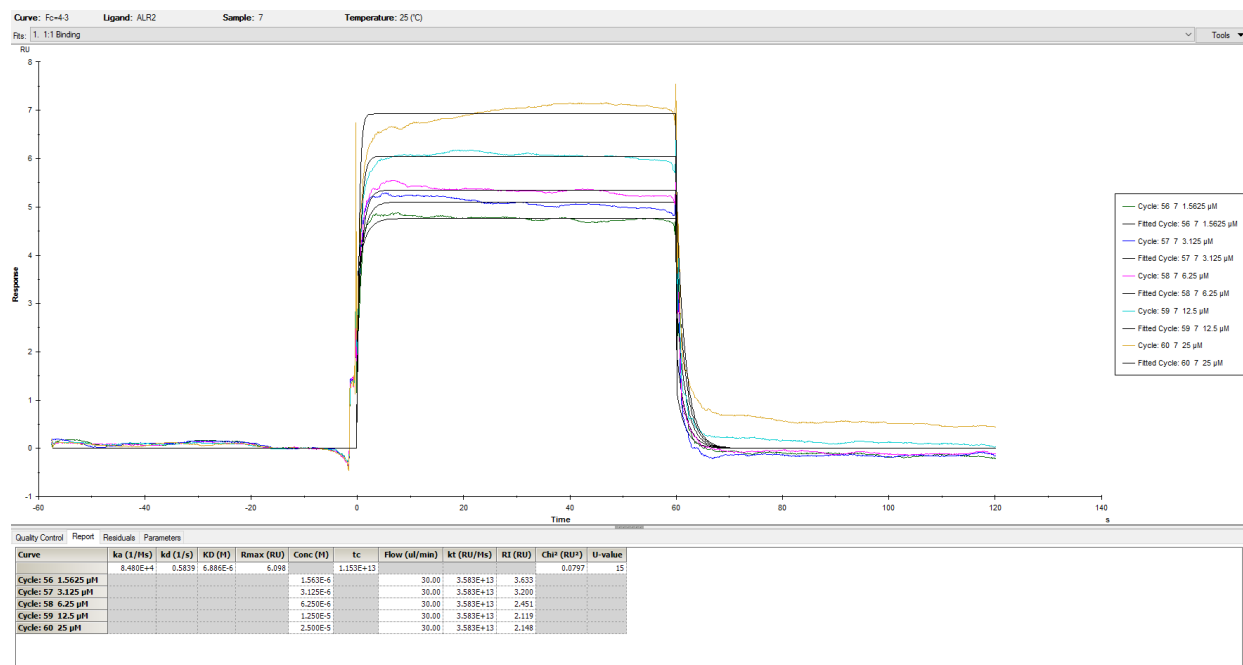

**Figure S25.** SPR experiment of compound **14** using the Biacore T200 instrument.

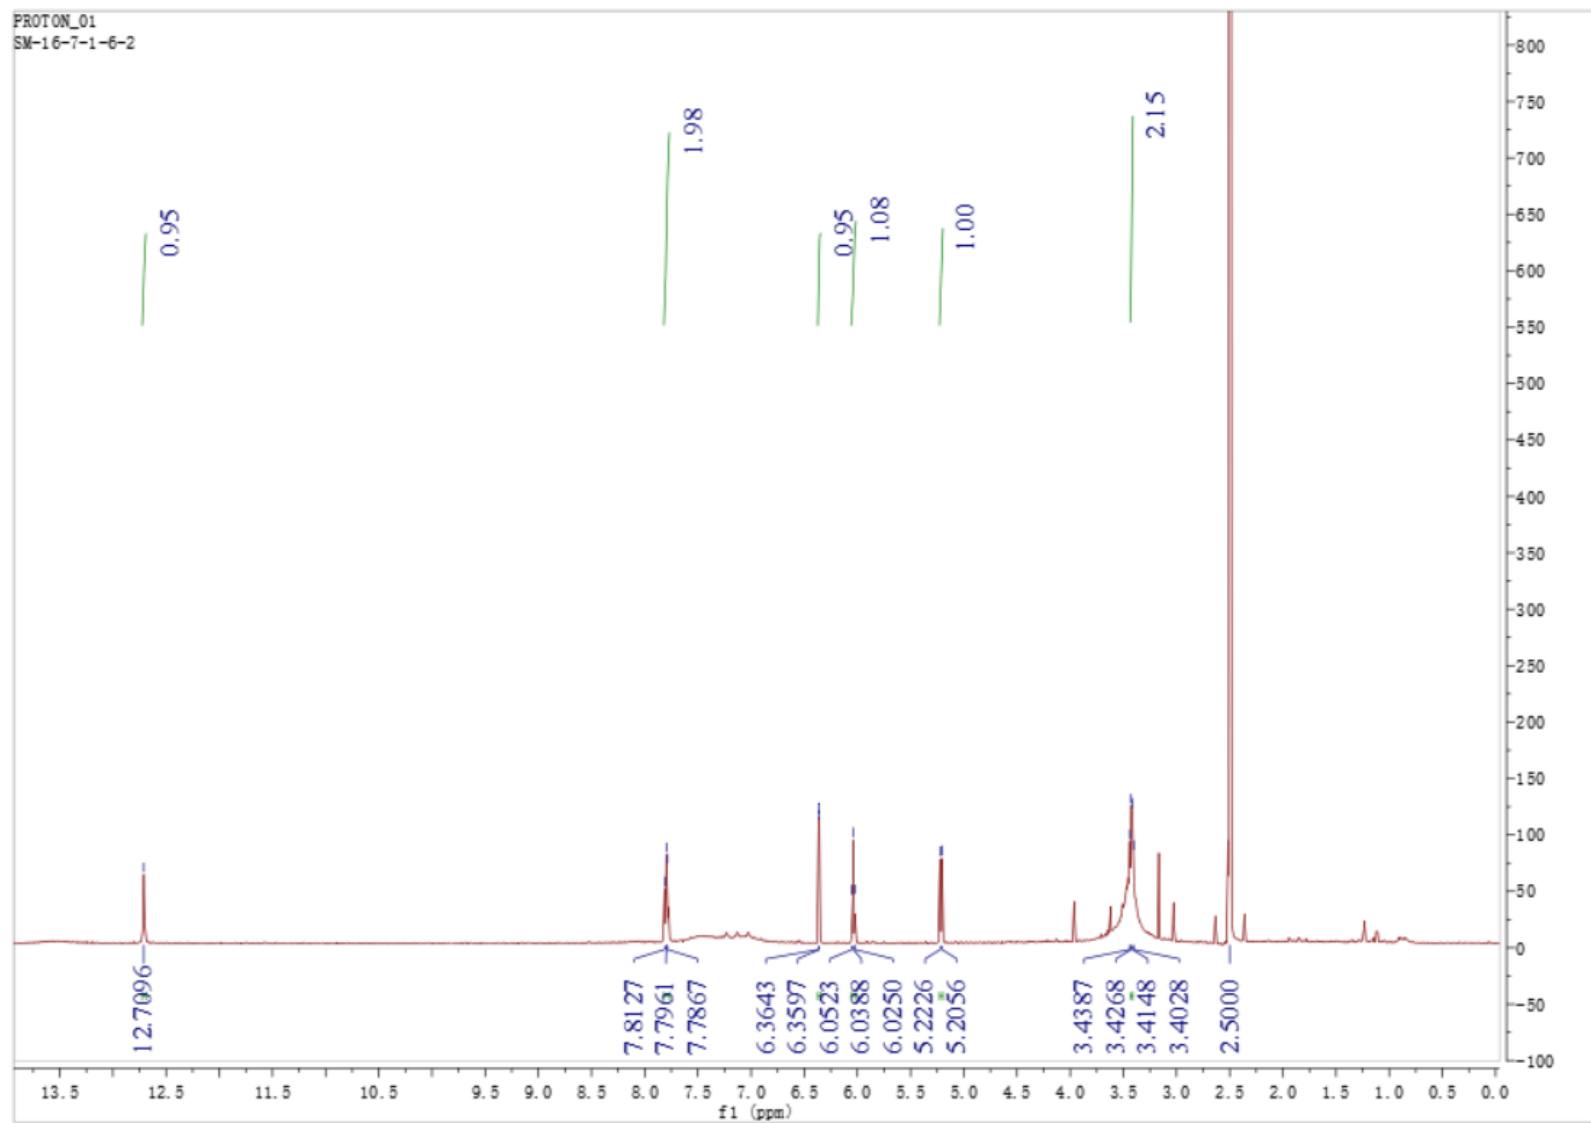

**Figure S26.**  $^1\text{H}$  NMR spectrum of compound **1** in  $\text{DMSO}-d_6$  (500 MHz).



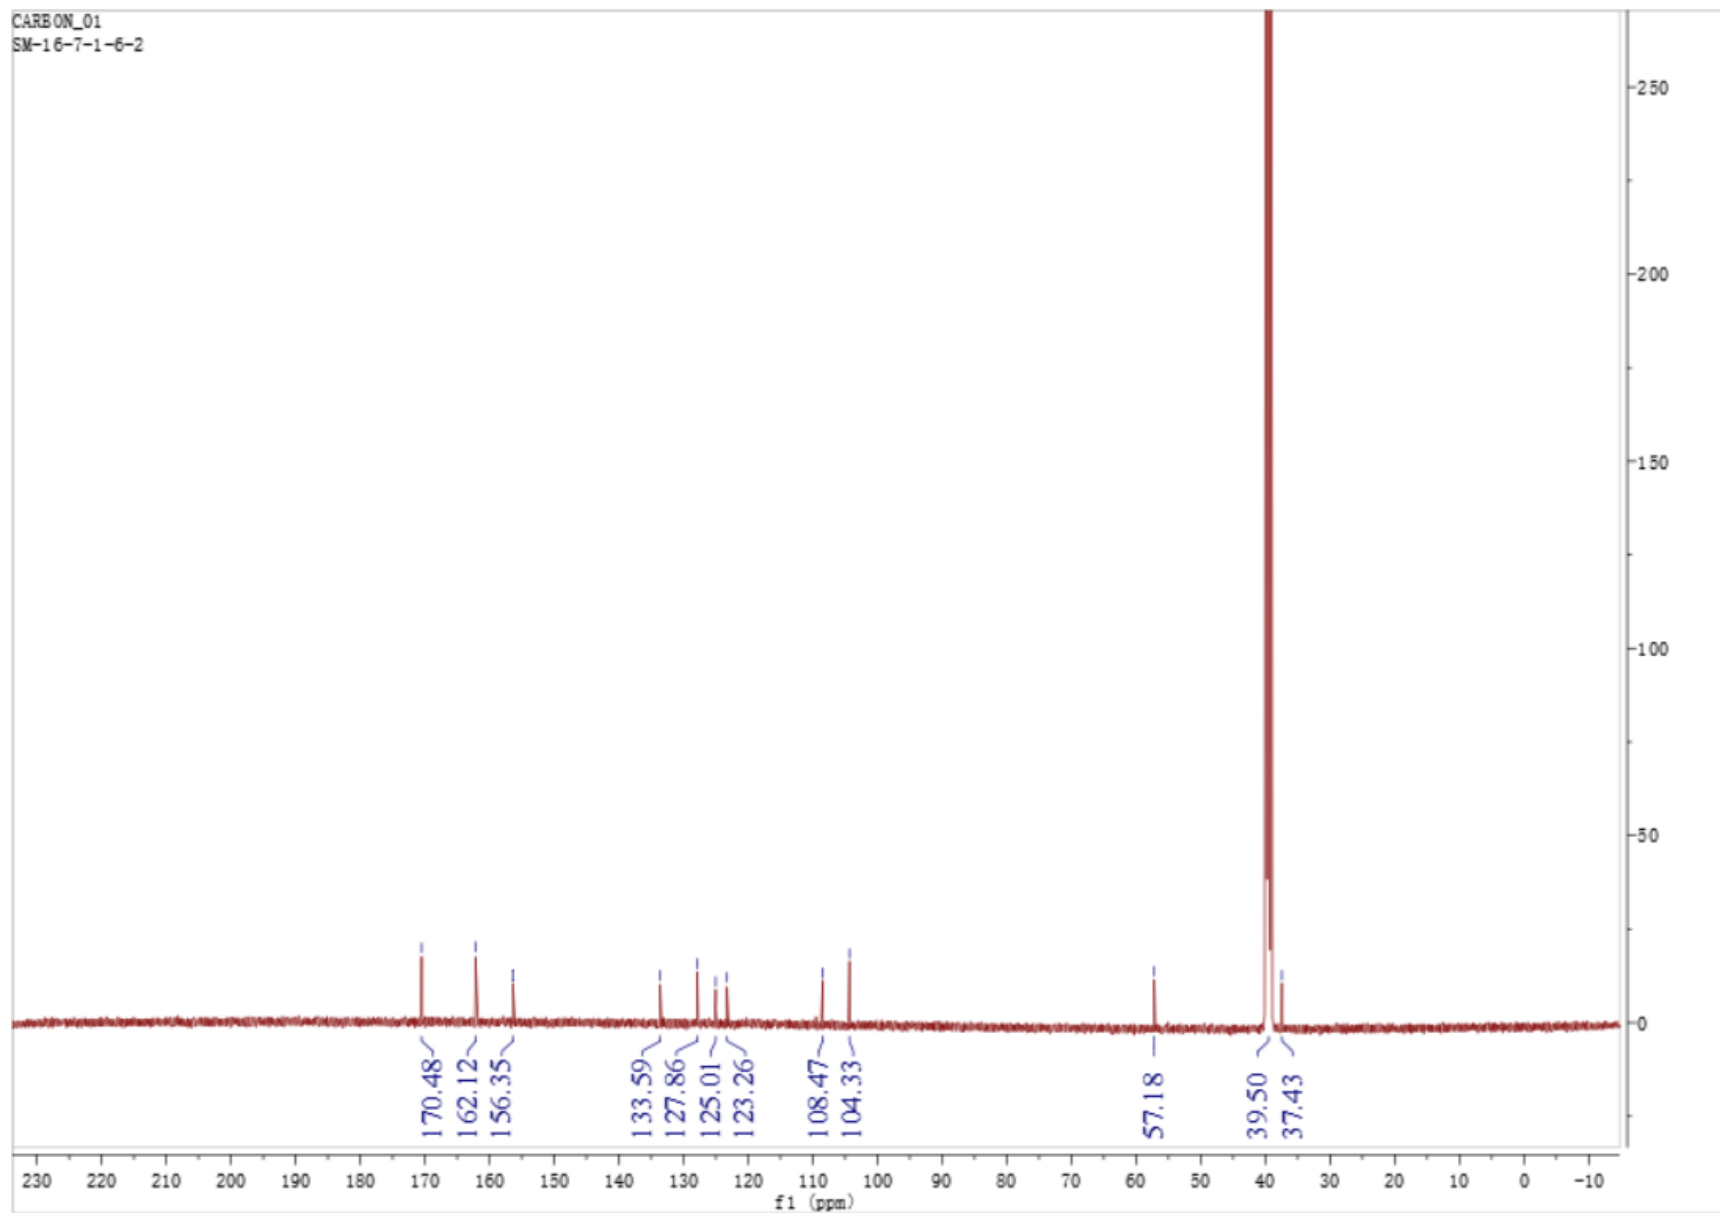

**Figure S27.**  $^{13}\text{C}$  NMR spectrum of compound **1** in  $\text{DMSO}-d_6$  (125 MHz).

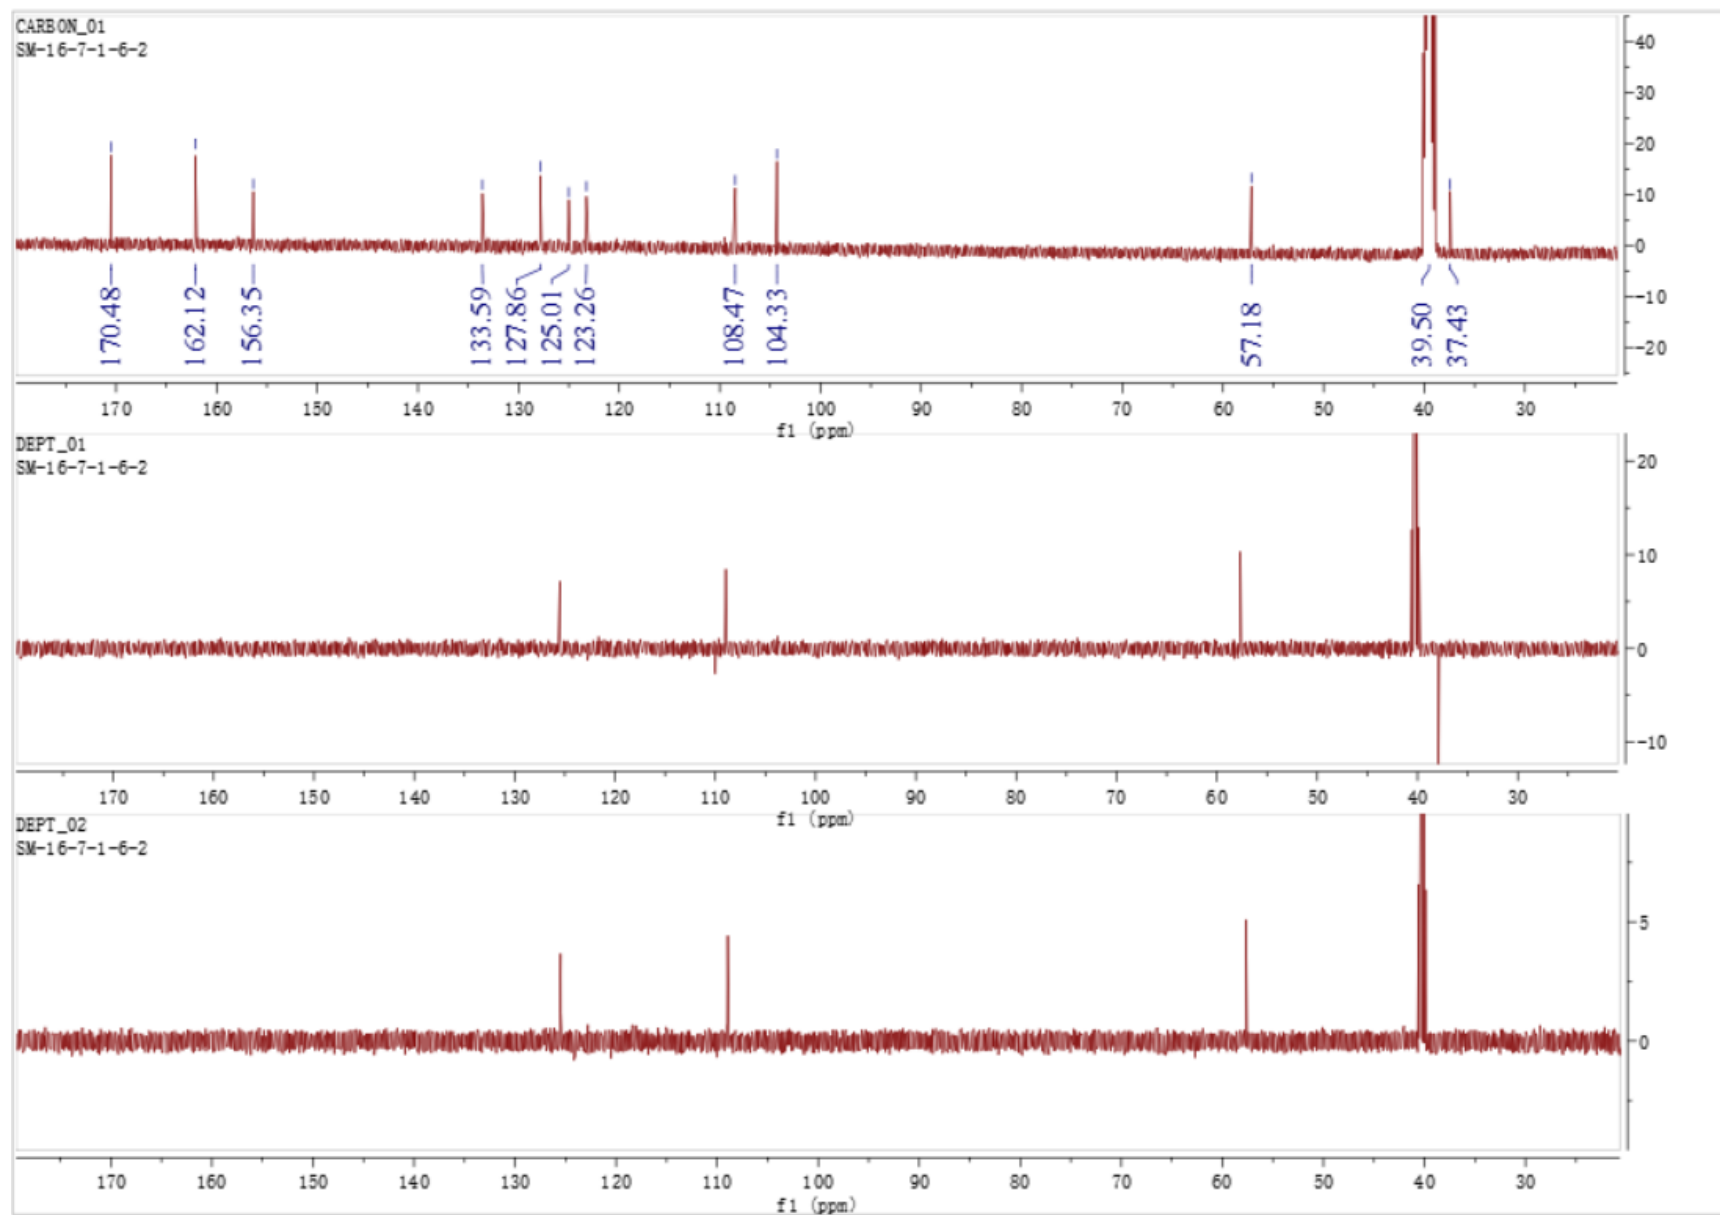

**Figure S28.**  $^{13}\text{C}$  NMR and DEPT spectrum of compound **1** in  $\text{DMSO}-d_6$  (125 MHz).

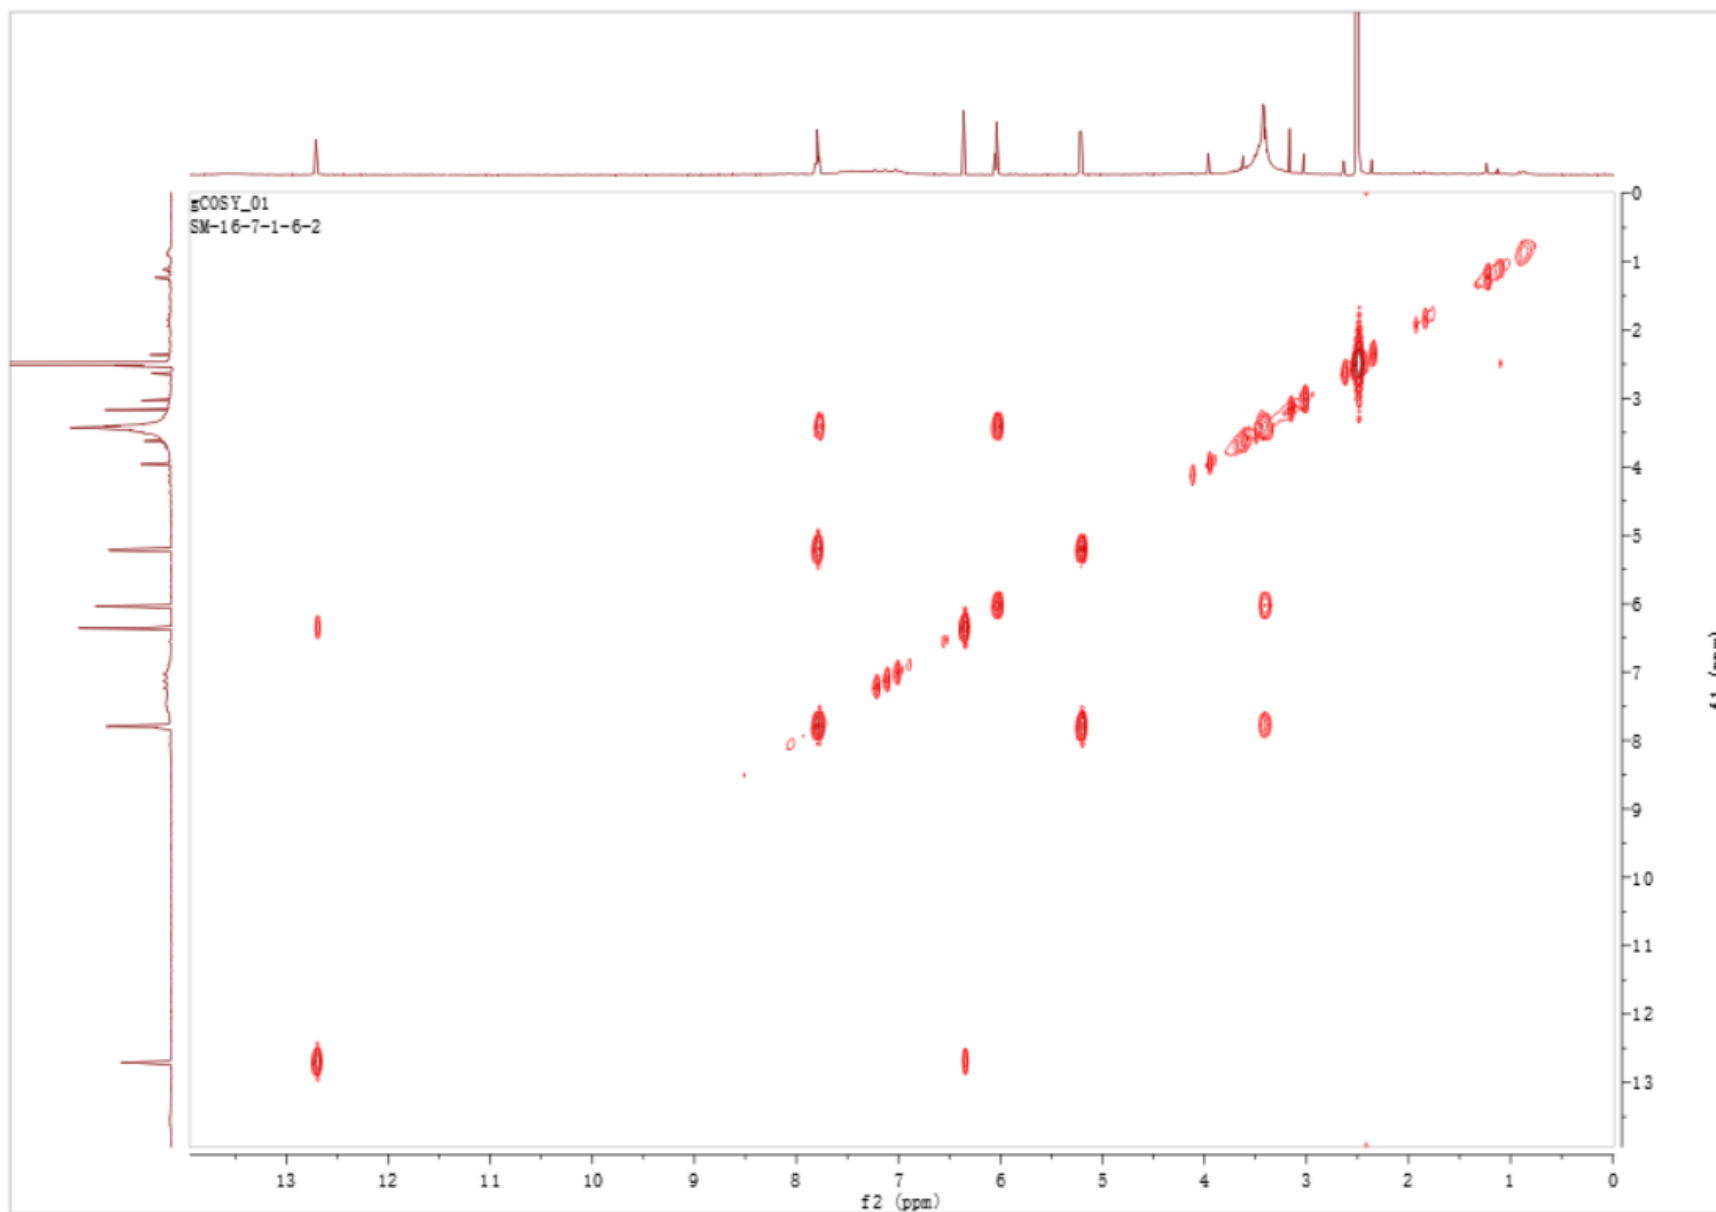

**Figure S29.**  $^1\text{H}$ - $^1\text{H}$  COSY spectrum of compound **1** in  $\text{DMSO}-d_6$  (500 MHz).

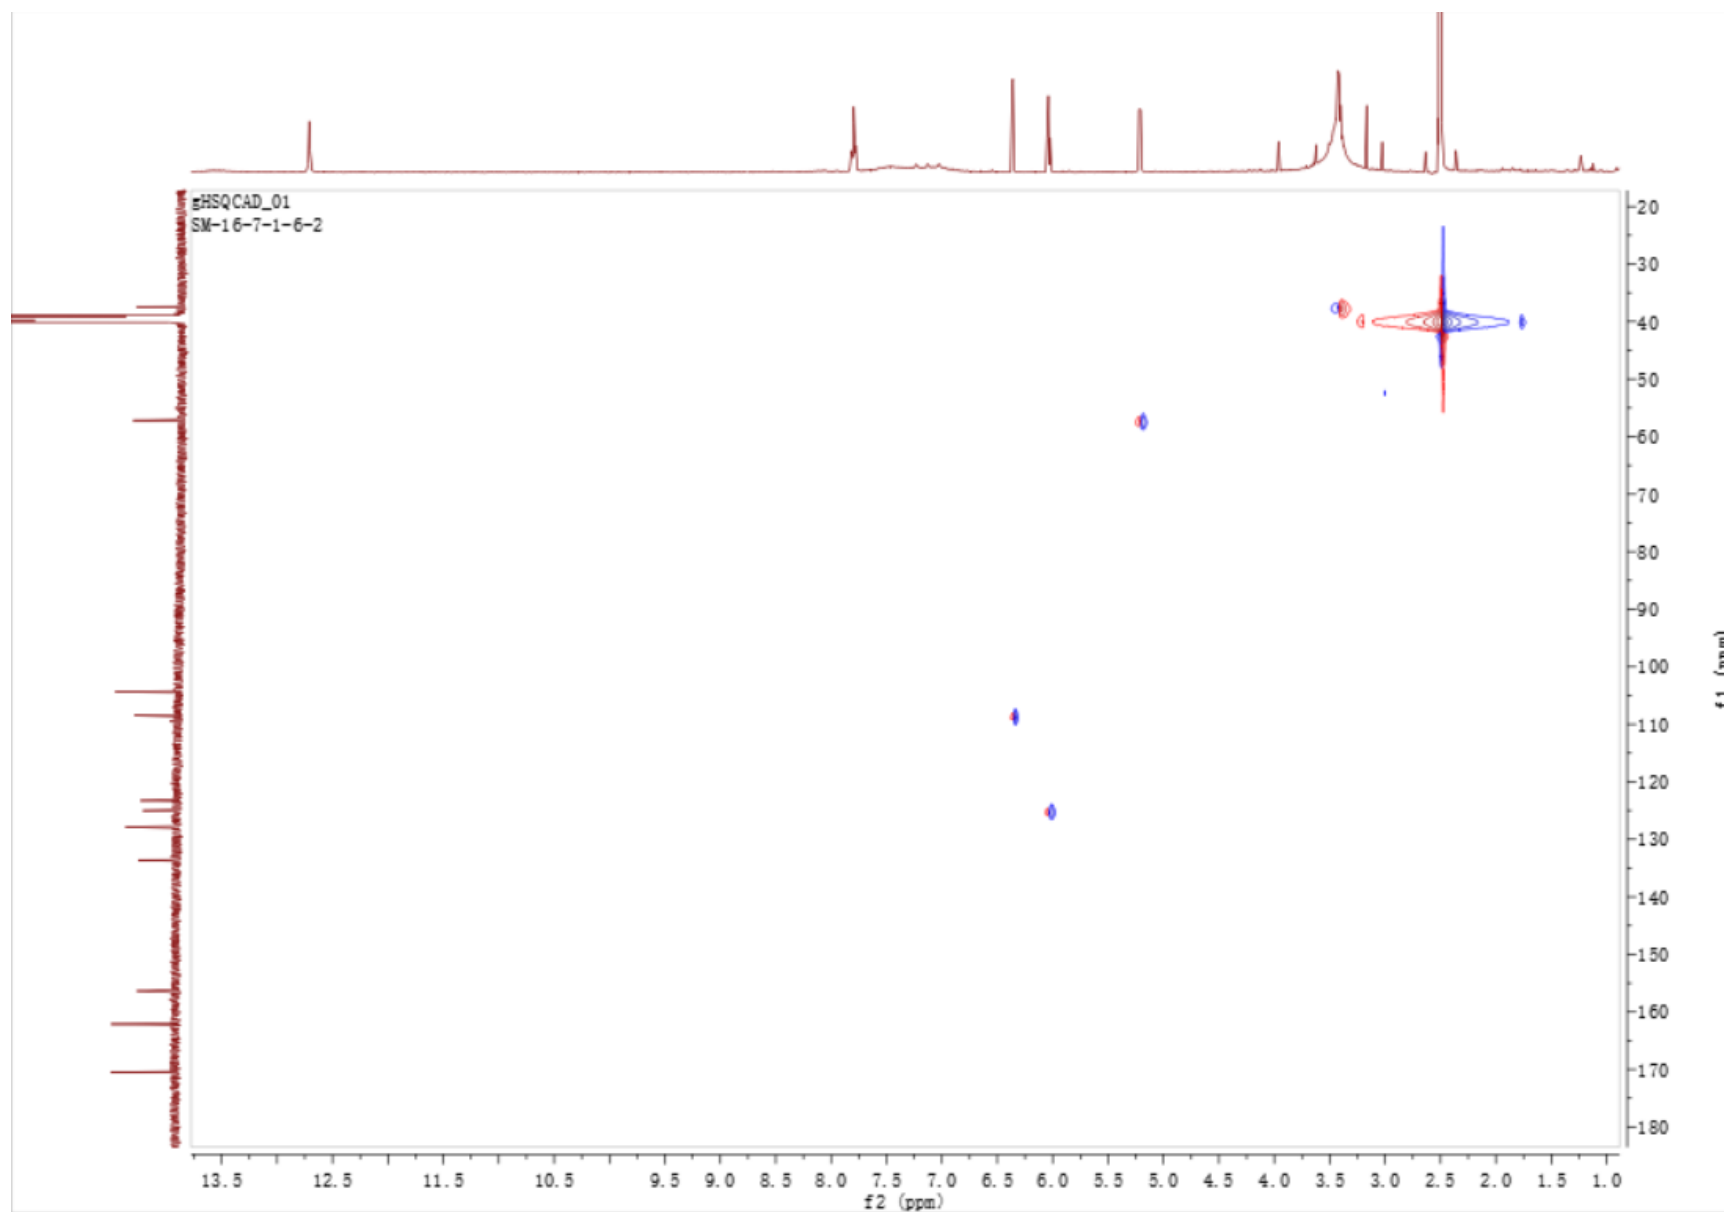

**Figure S30.** HSQC spectrum of compound **1** in DMSO- $d_6$  (500 MHz).

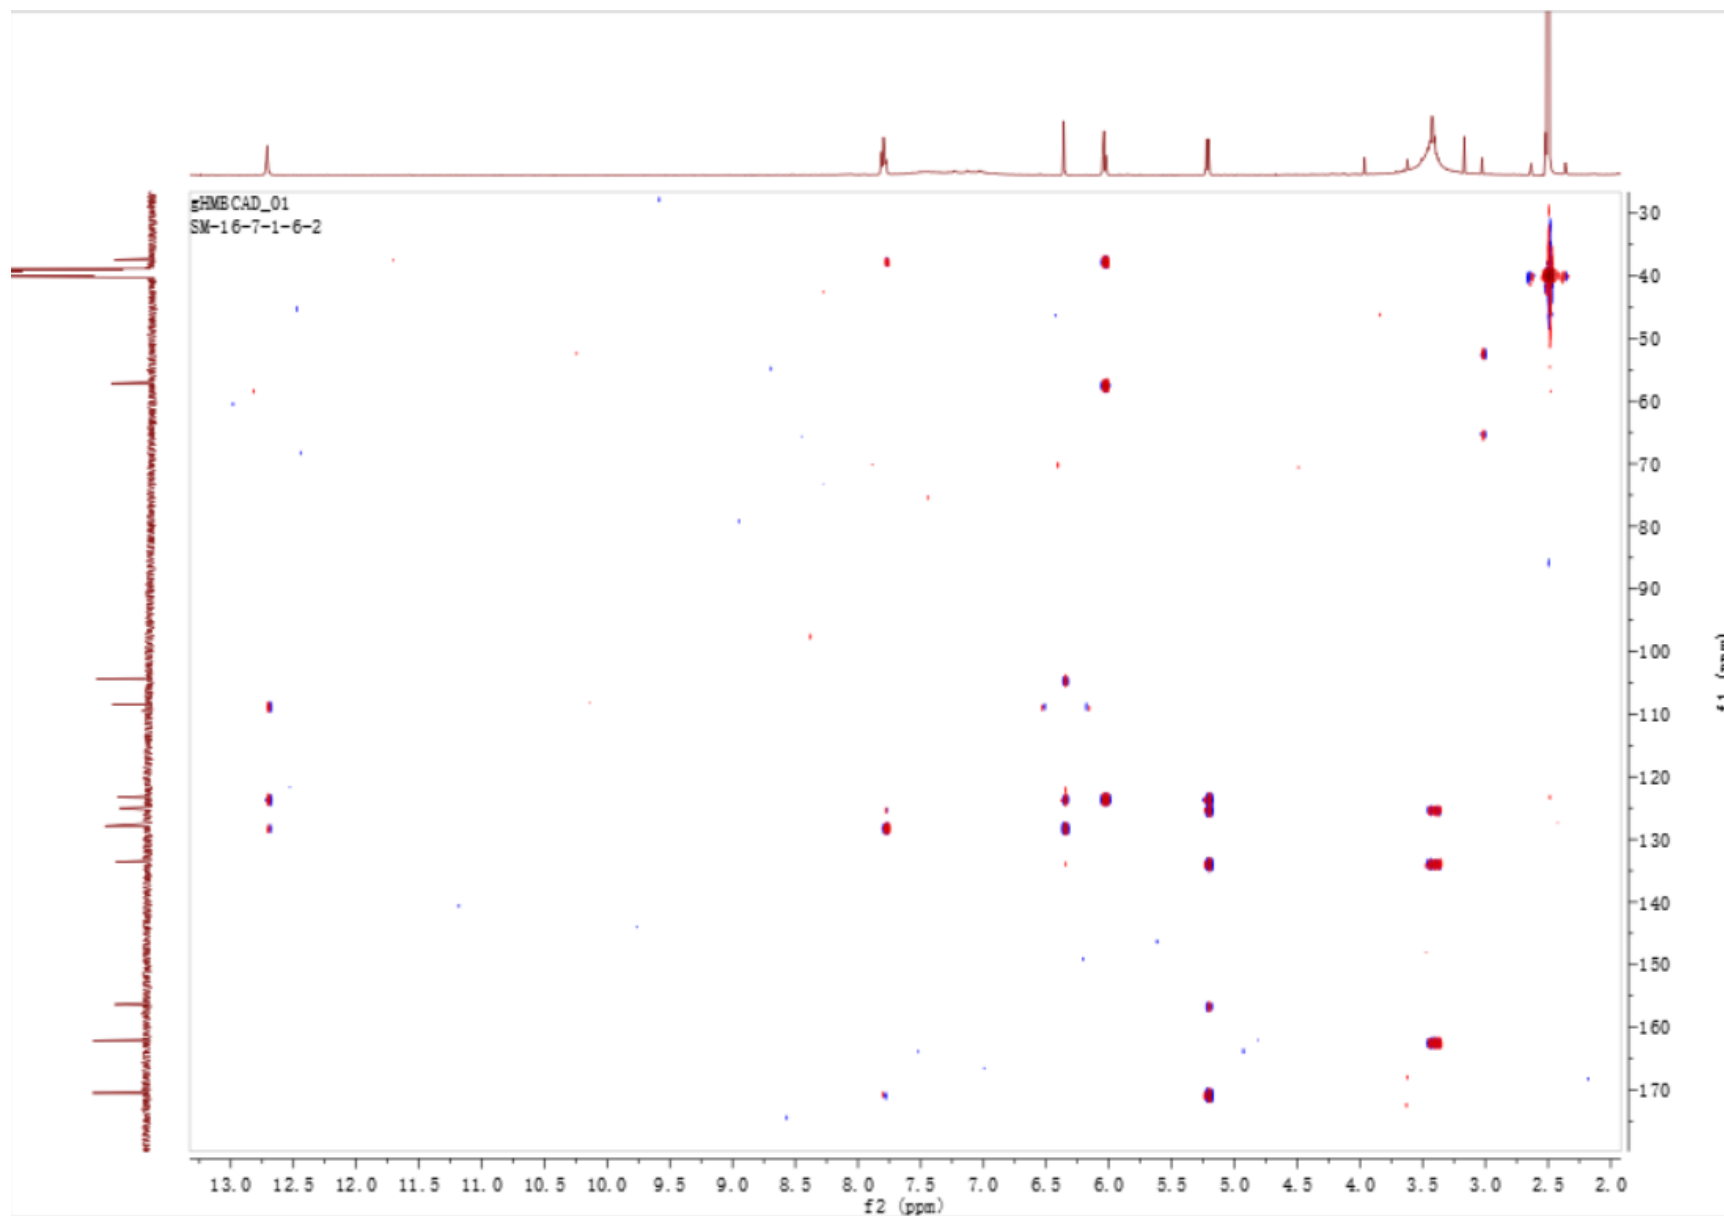

**Figure S31.** HMBC spectrum of compound **1** in DMSO-*d*<sub>6</sub> (500 MHz).

SM-16-7-1-6-2 #42 RT: 0.10 AV: 1 NL: 2.67E9  
T: FTMS + p ESI Full ms [200.0000-500.0000]

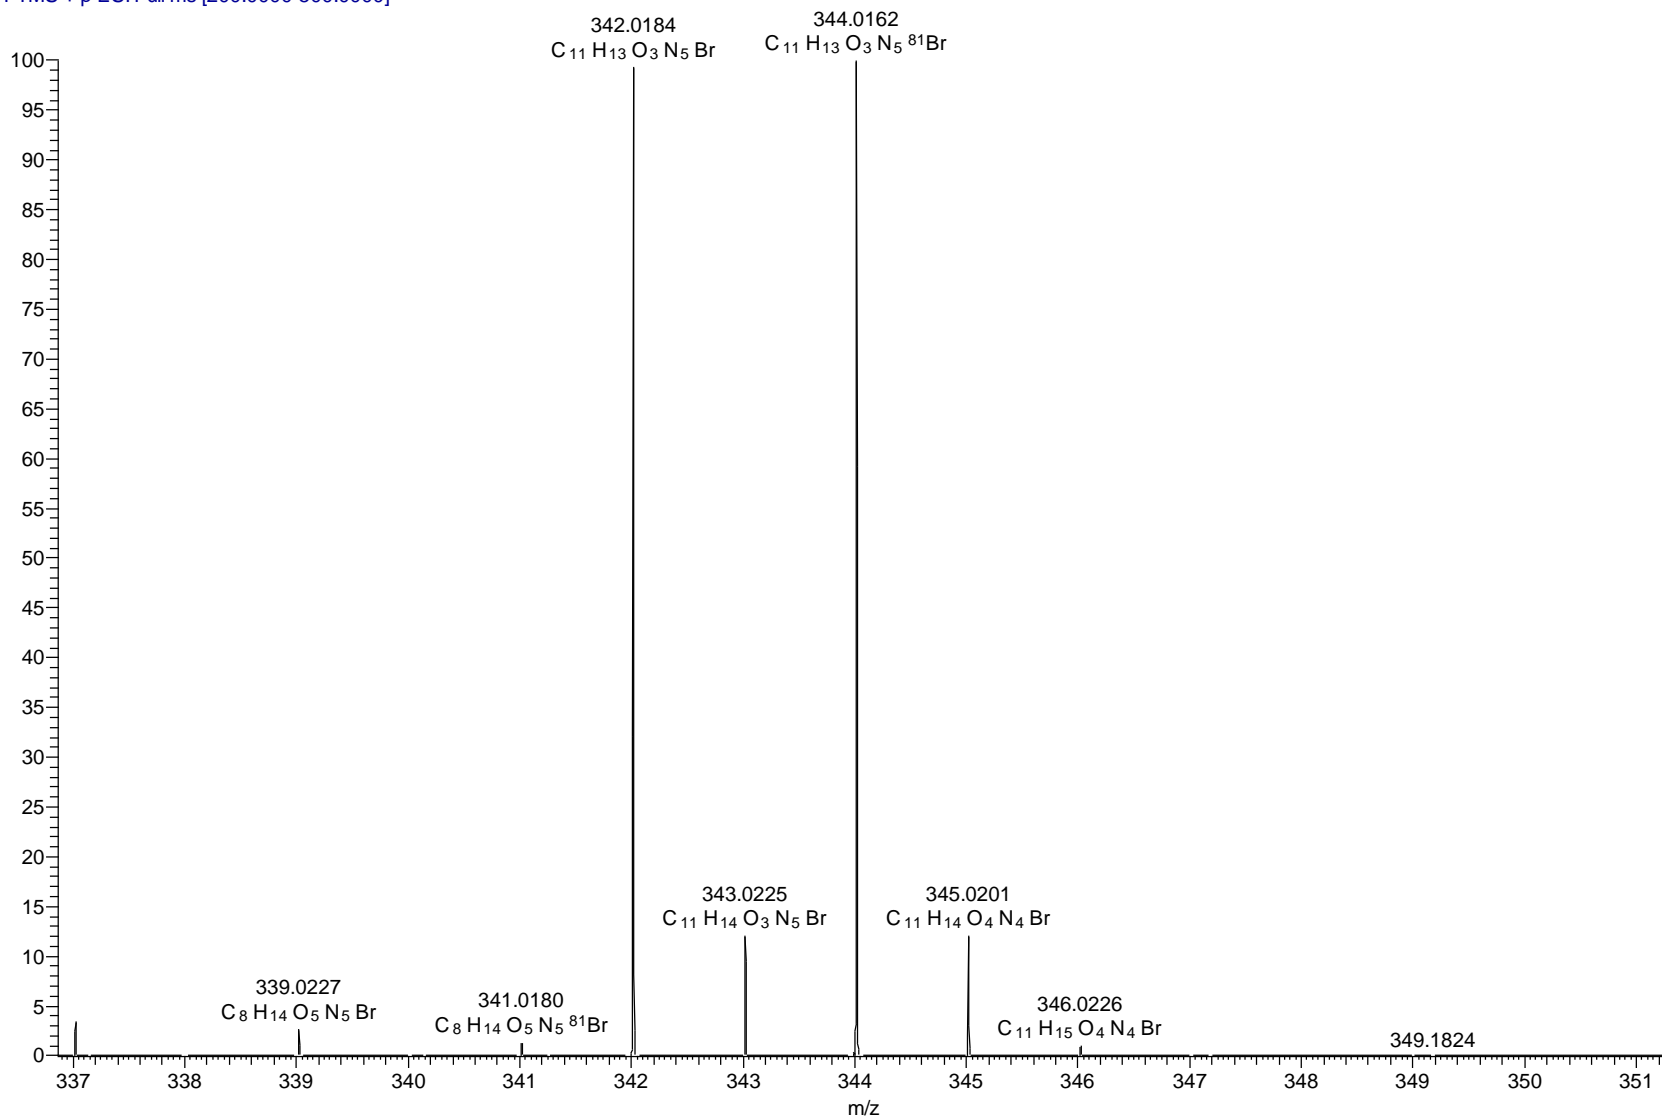

Figure S32. HRESIMS data of compound 1.

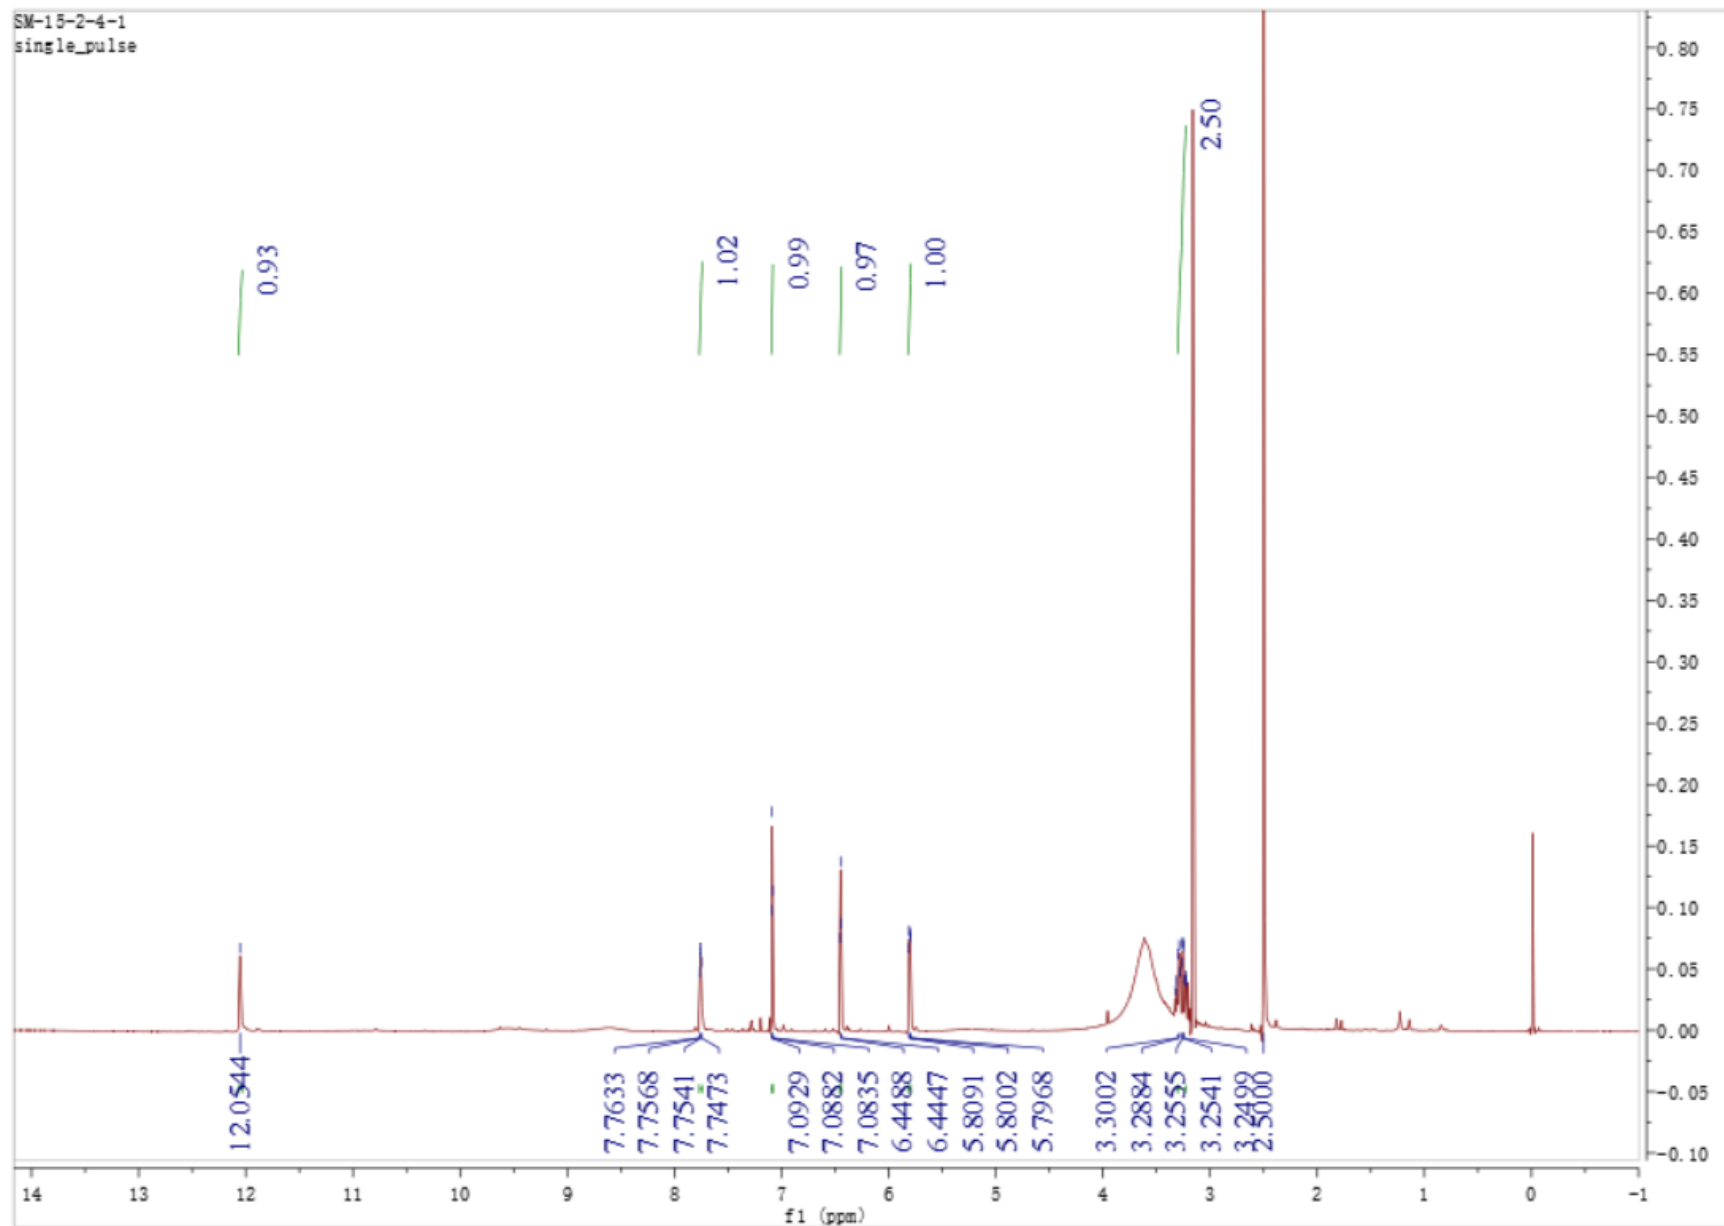

**Figure S33.**  $^1\text{H}$  NMR spectrum of compound **2** in  $\text{DMSO-}d_6$  (500 MHz).

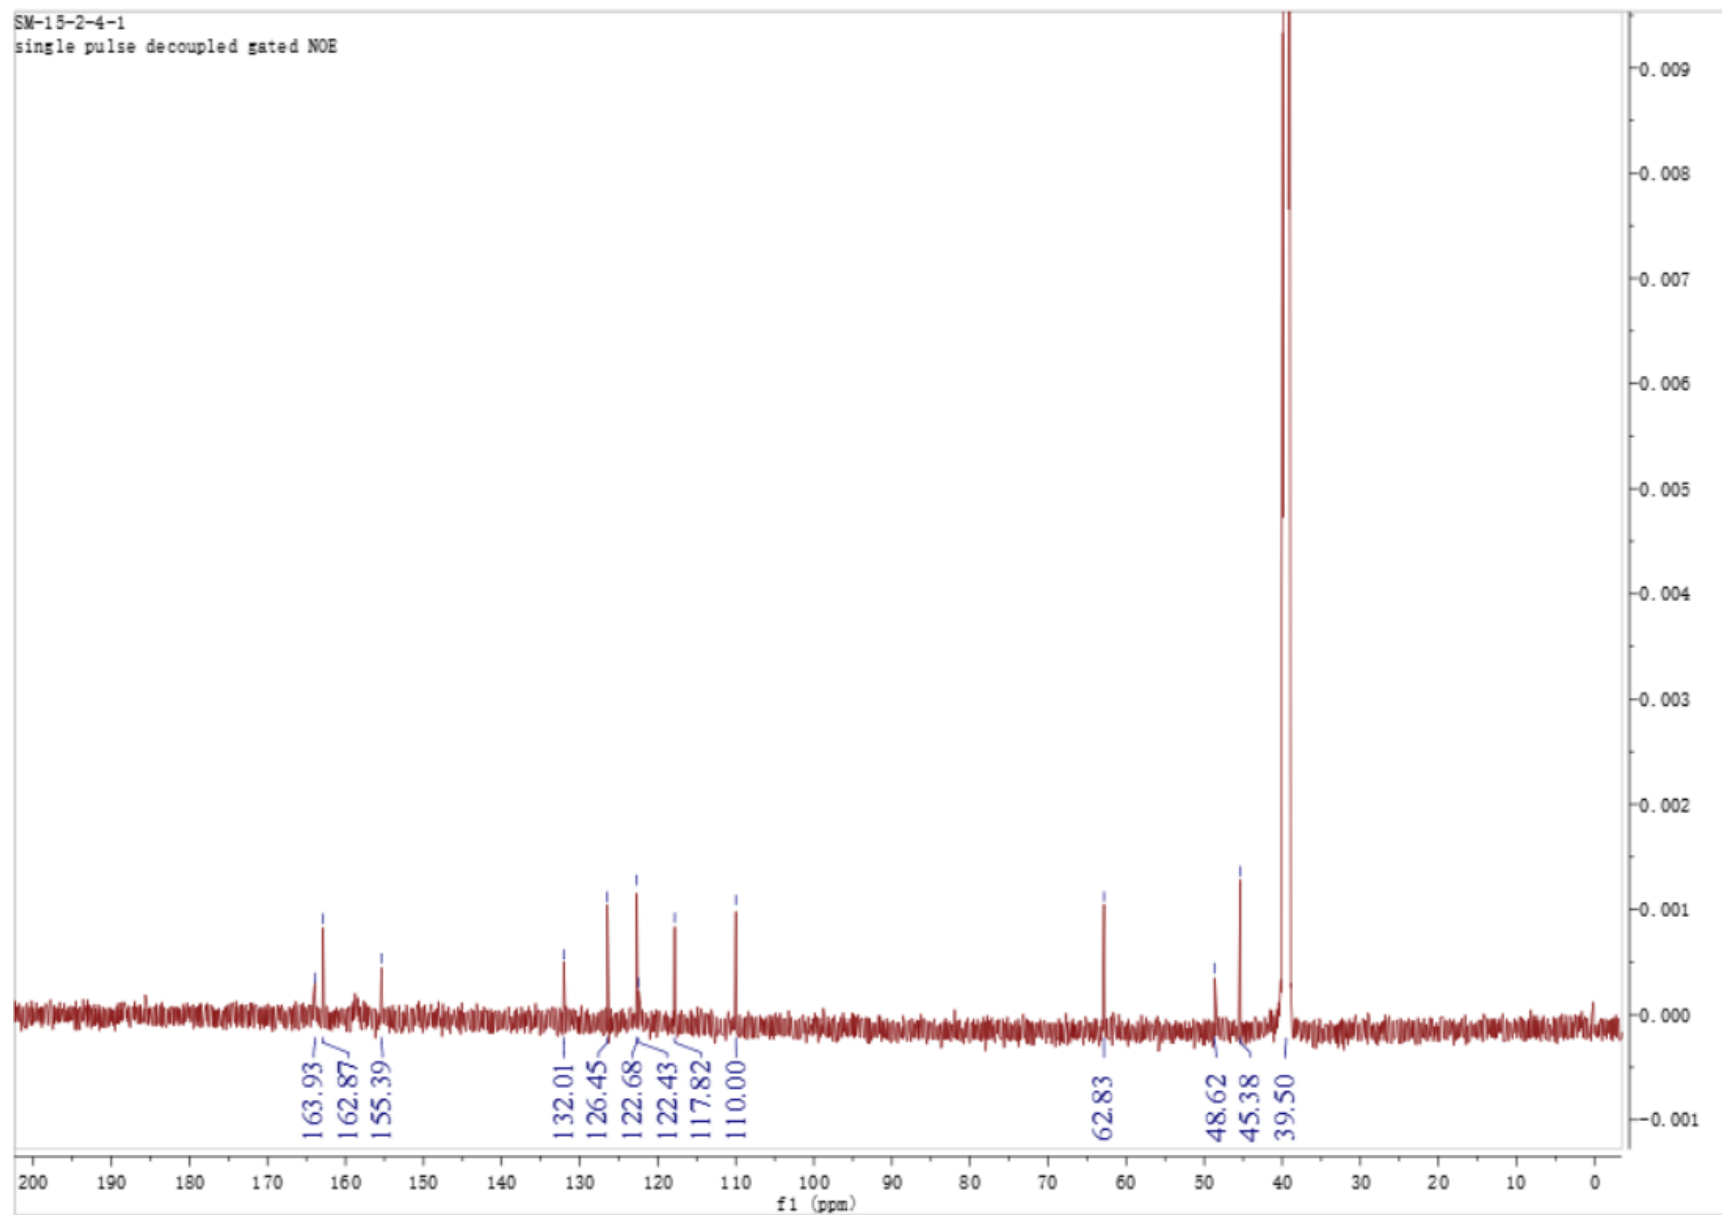

**Figure S34.**  $^{13}\text{C}$  NMR spectrum of compound **2** in  $\text{DMSO-}d_6$  (125 MHz).



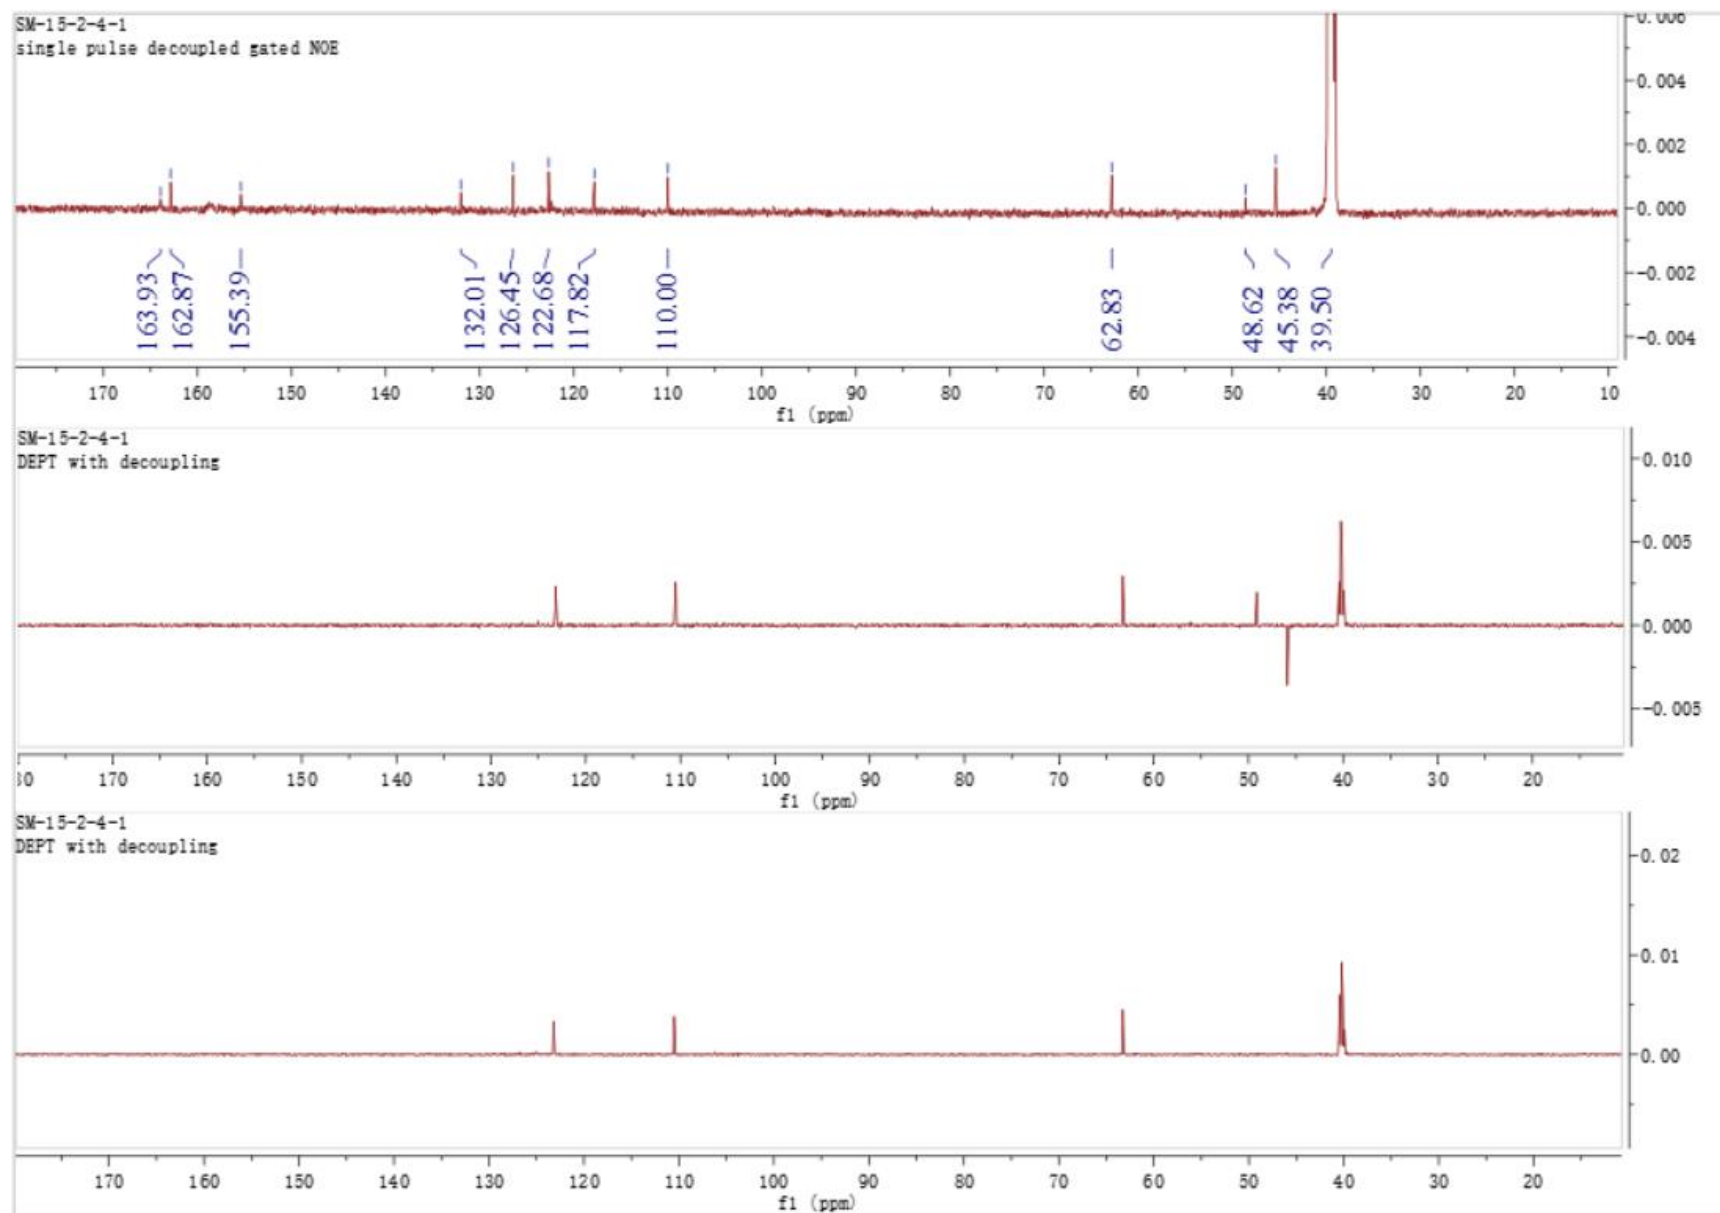

**Figure S35.**  $^{13}\text{C}$  NMR and DEPT spectrum of compound **2** in  $\text{DMSO}-d_6$  (125 MHz).

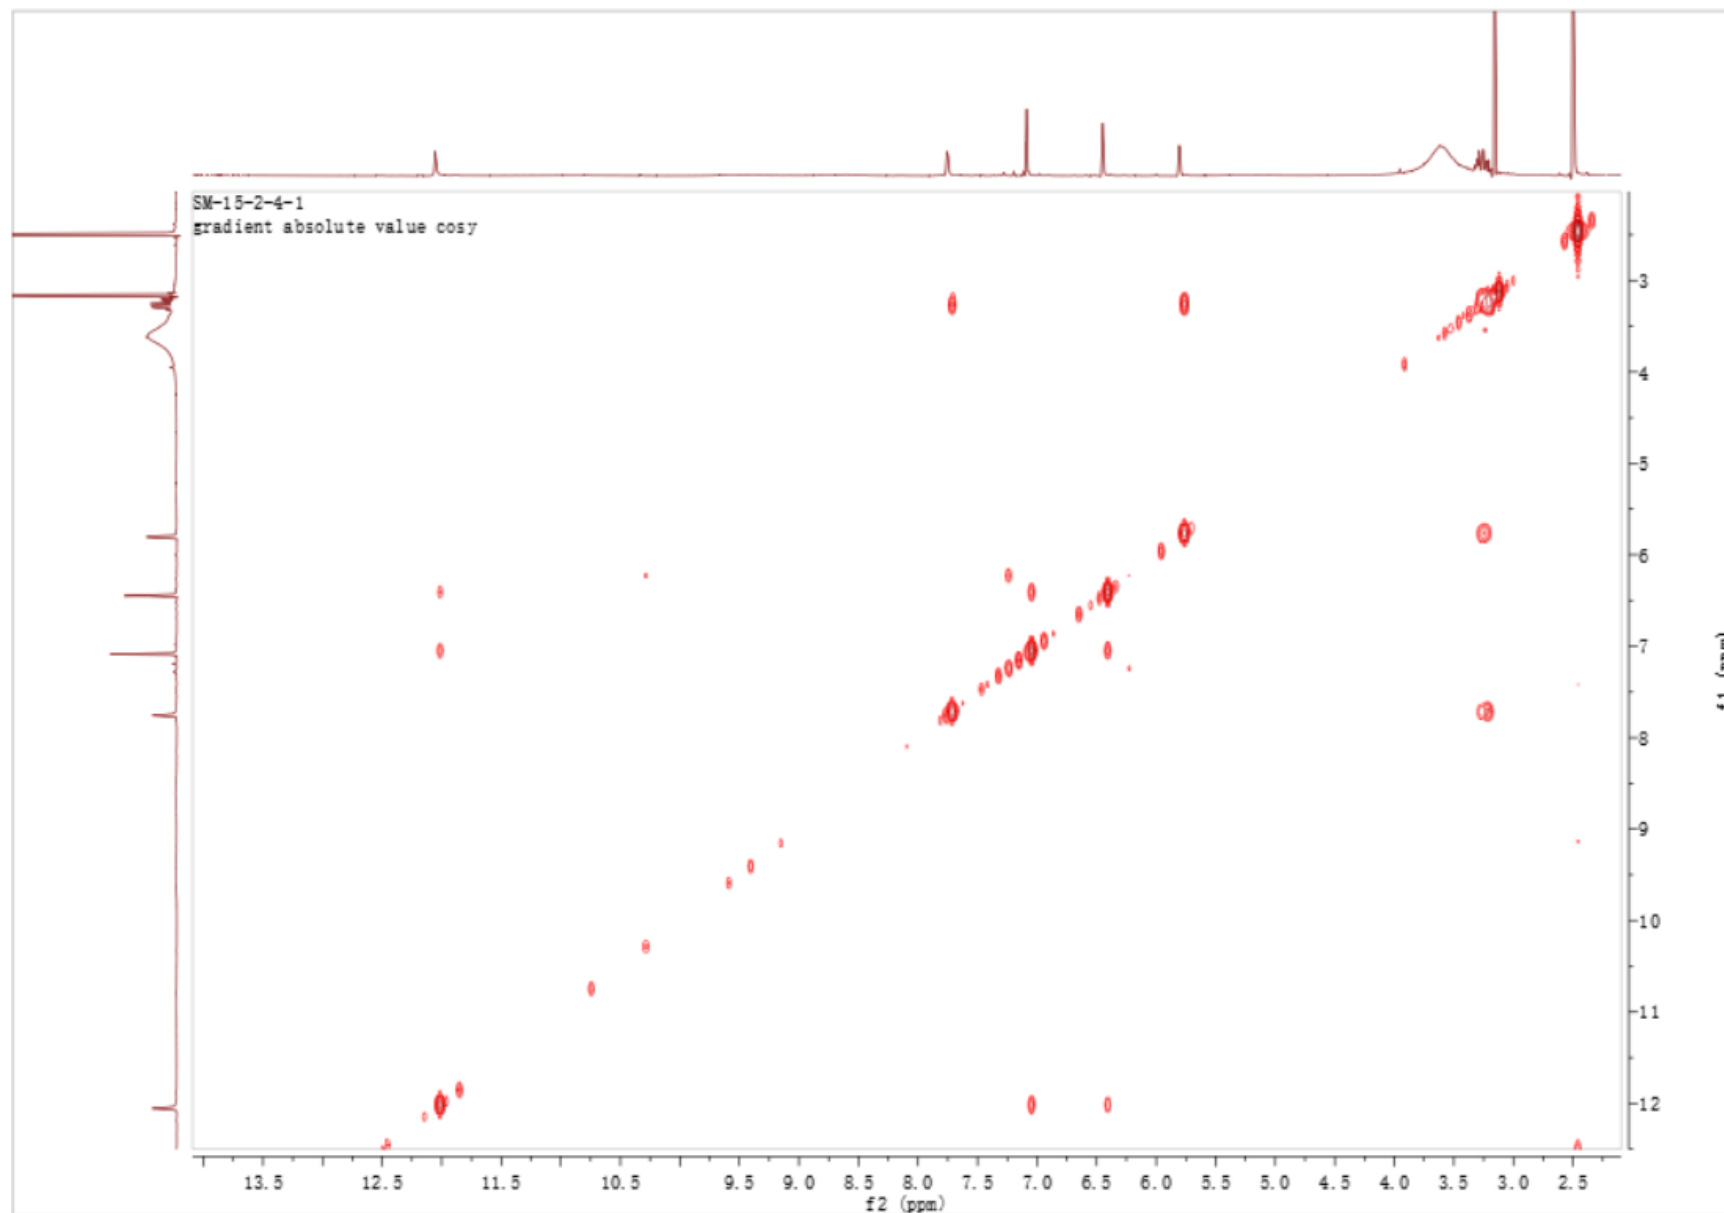

**Figure S36.**  $^1\text{H}$ - $^1\text{H}$  COSY spectrum of compound **2** in  $\text{DMSO}-d_6$  (500 MHz).

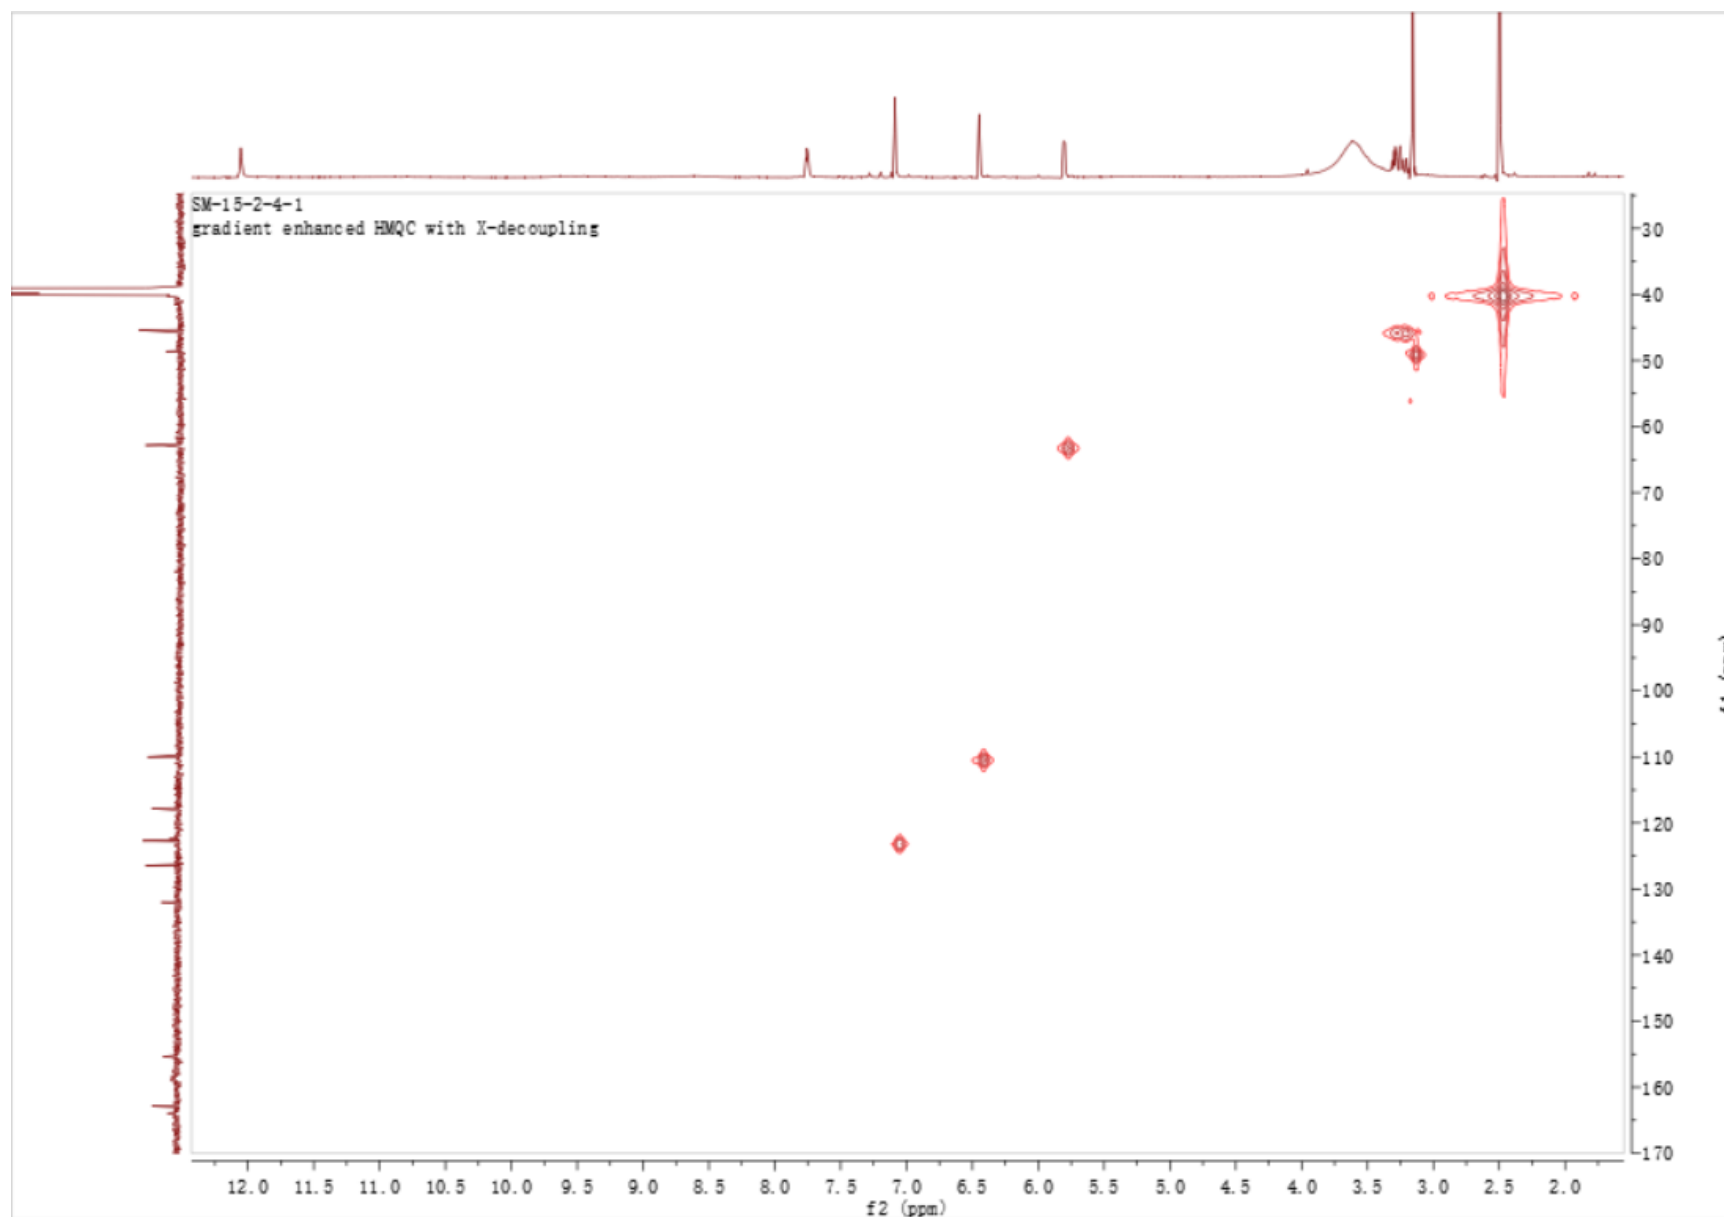

**Figure S37.** HSQC spectrum of compound **2** in DMSO-*d*<sub>6</sub> (500 MHz).

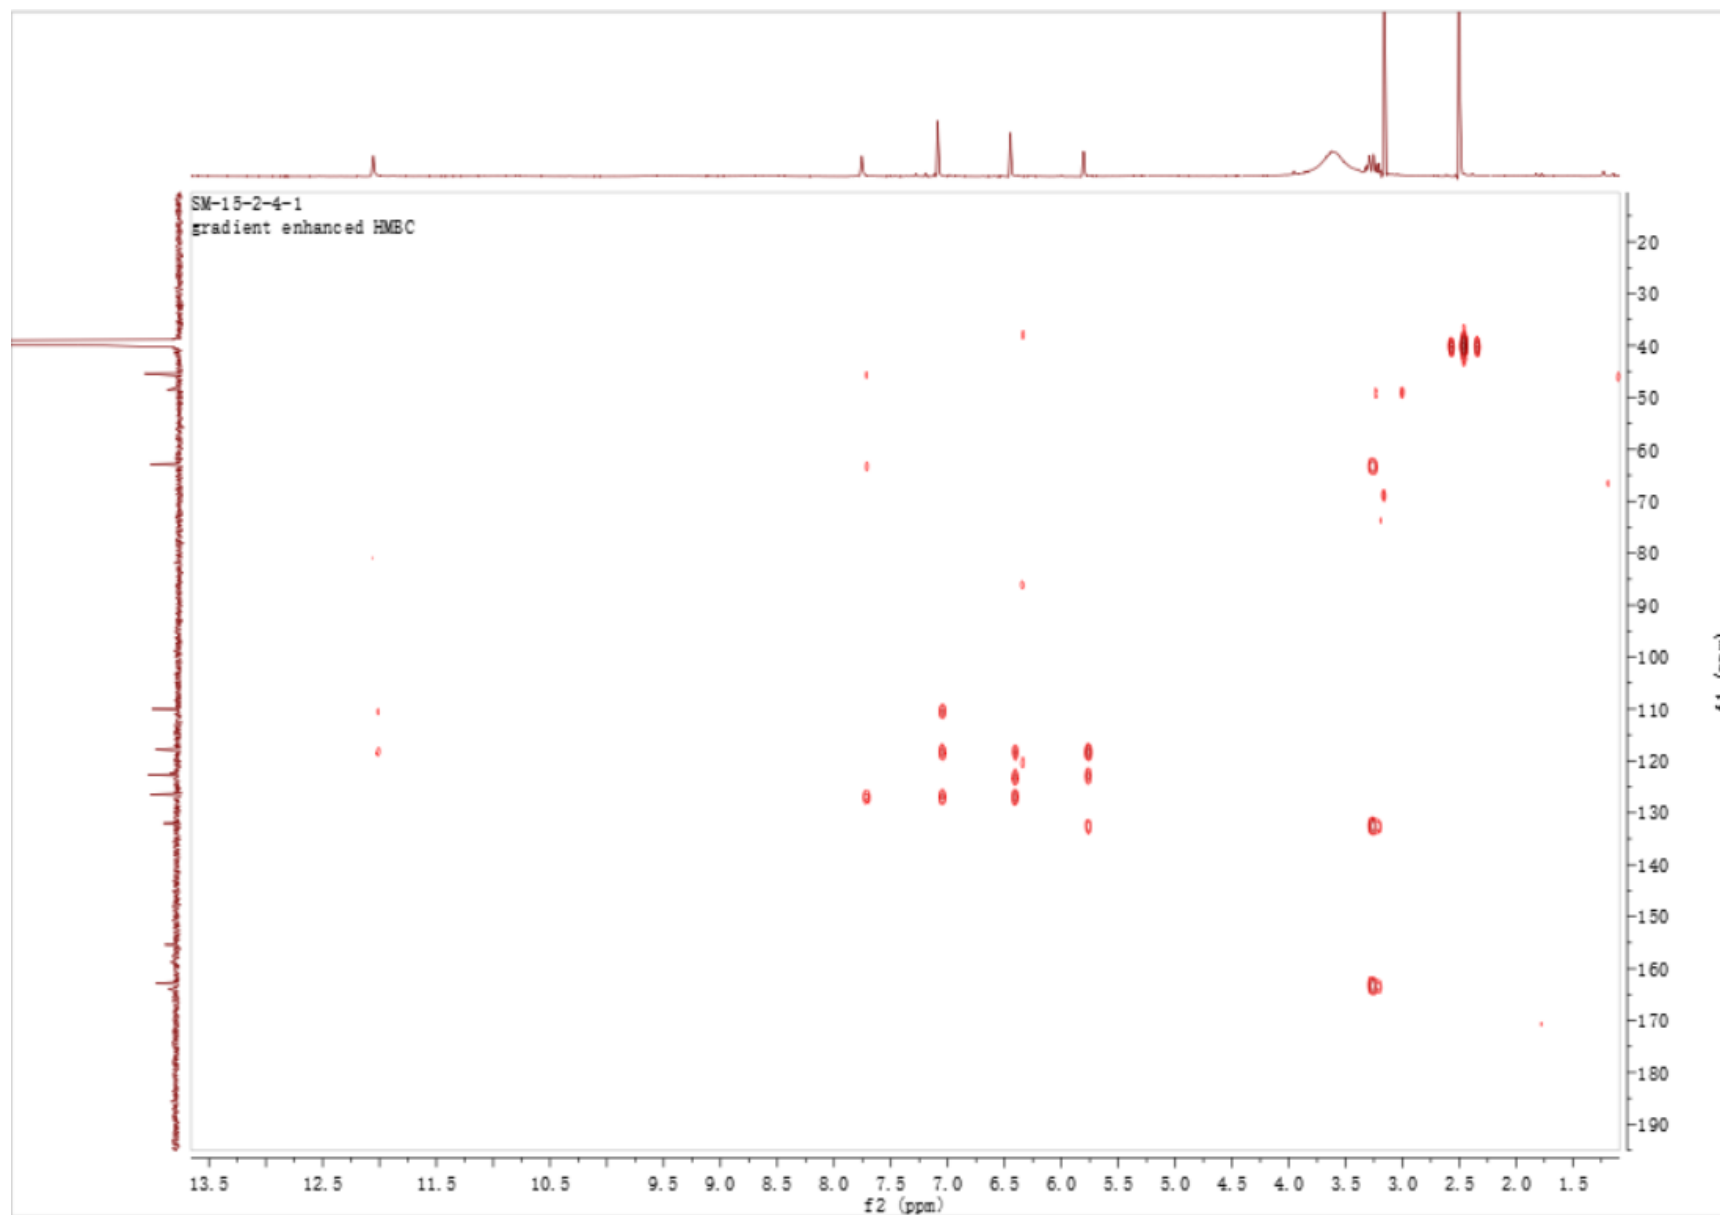

**Figure S38.** HMBC spectrum of compound **2** in DMSO-*d*<sub>6</sub> (500 MHz).

20211008-SM-15-2-4-1\_211008084545 #75 RT: 0.59 AV: 1 SB: 16 0.24-0.36 NL: 9.92E7  
T: FTMS + p ESI Full ms [150.00-1000.00]

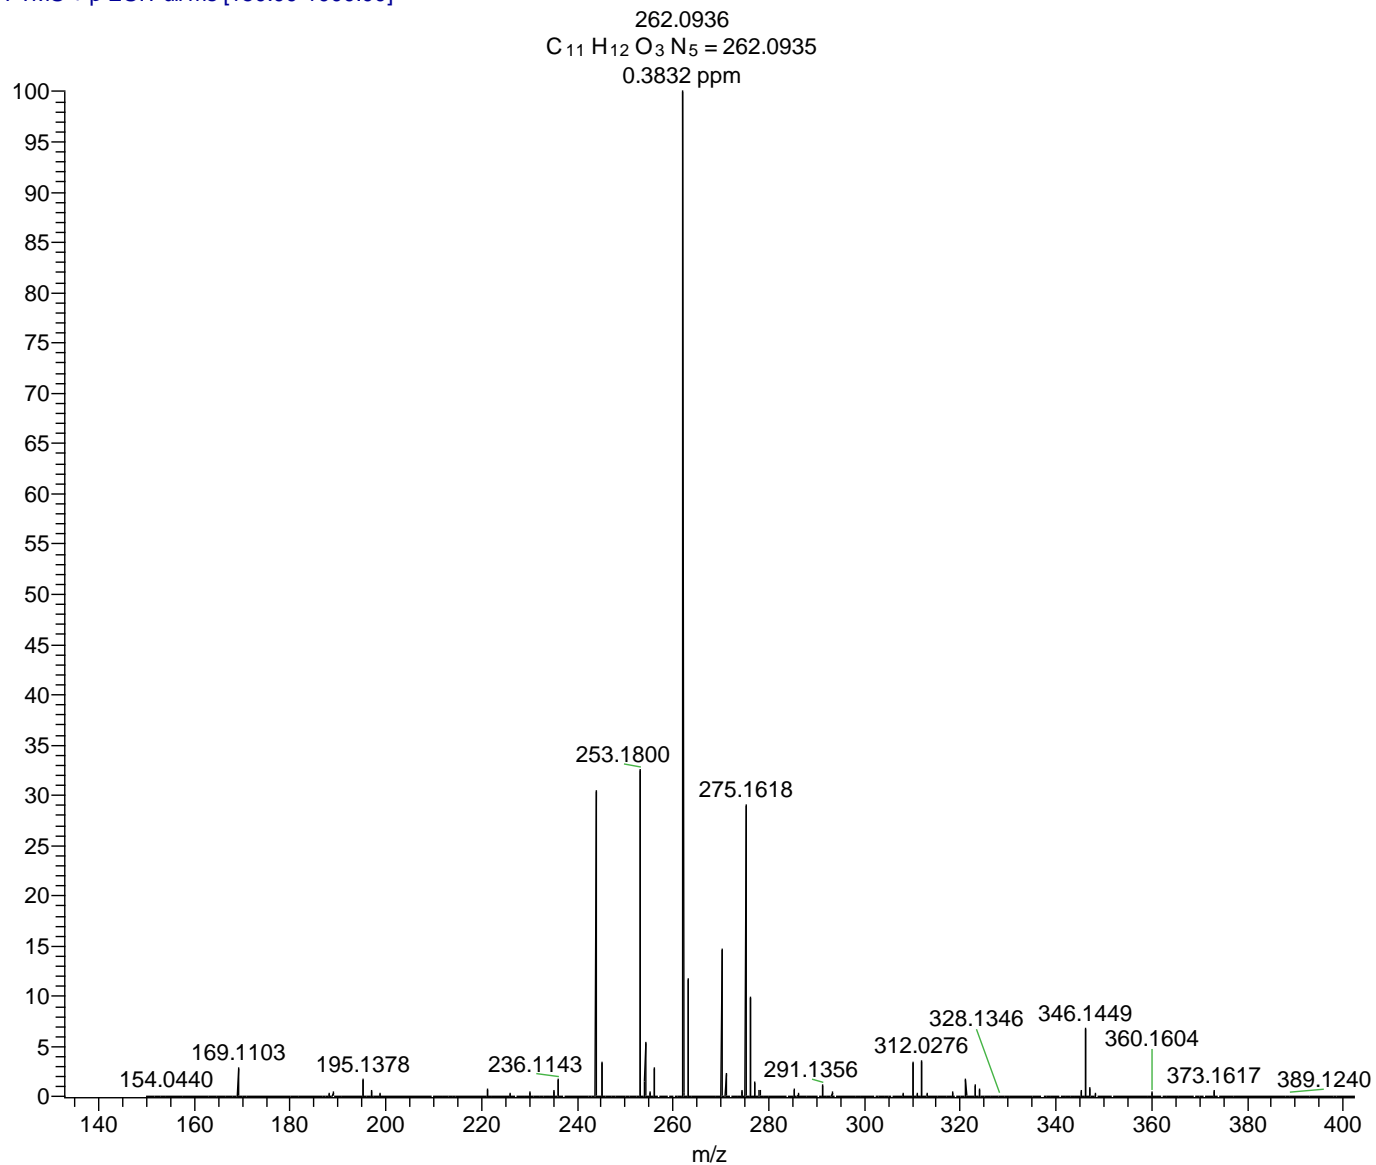

Figure S39. HRESIMS data of compound 2.

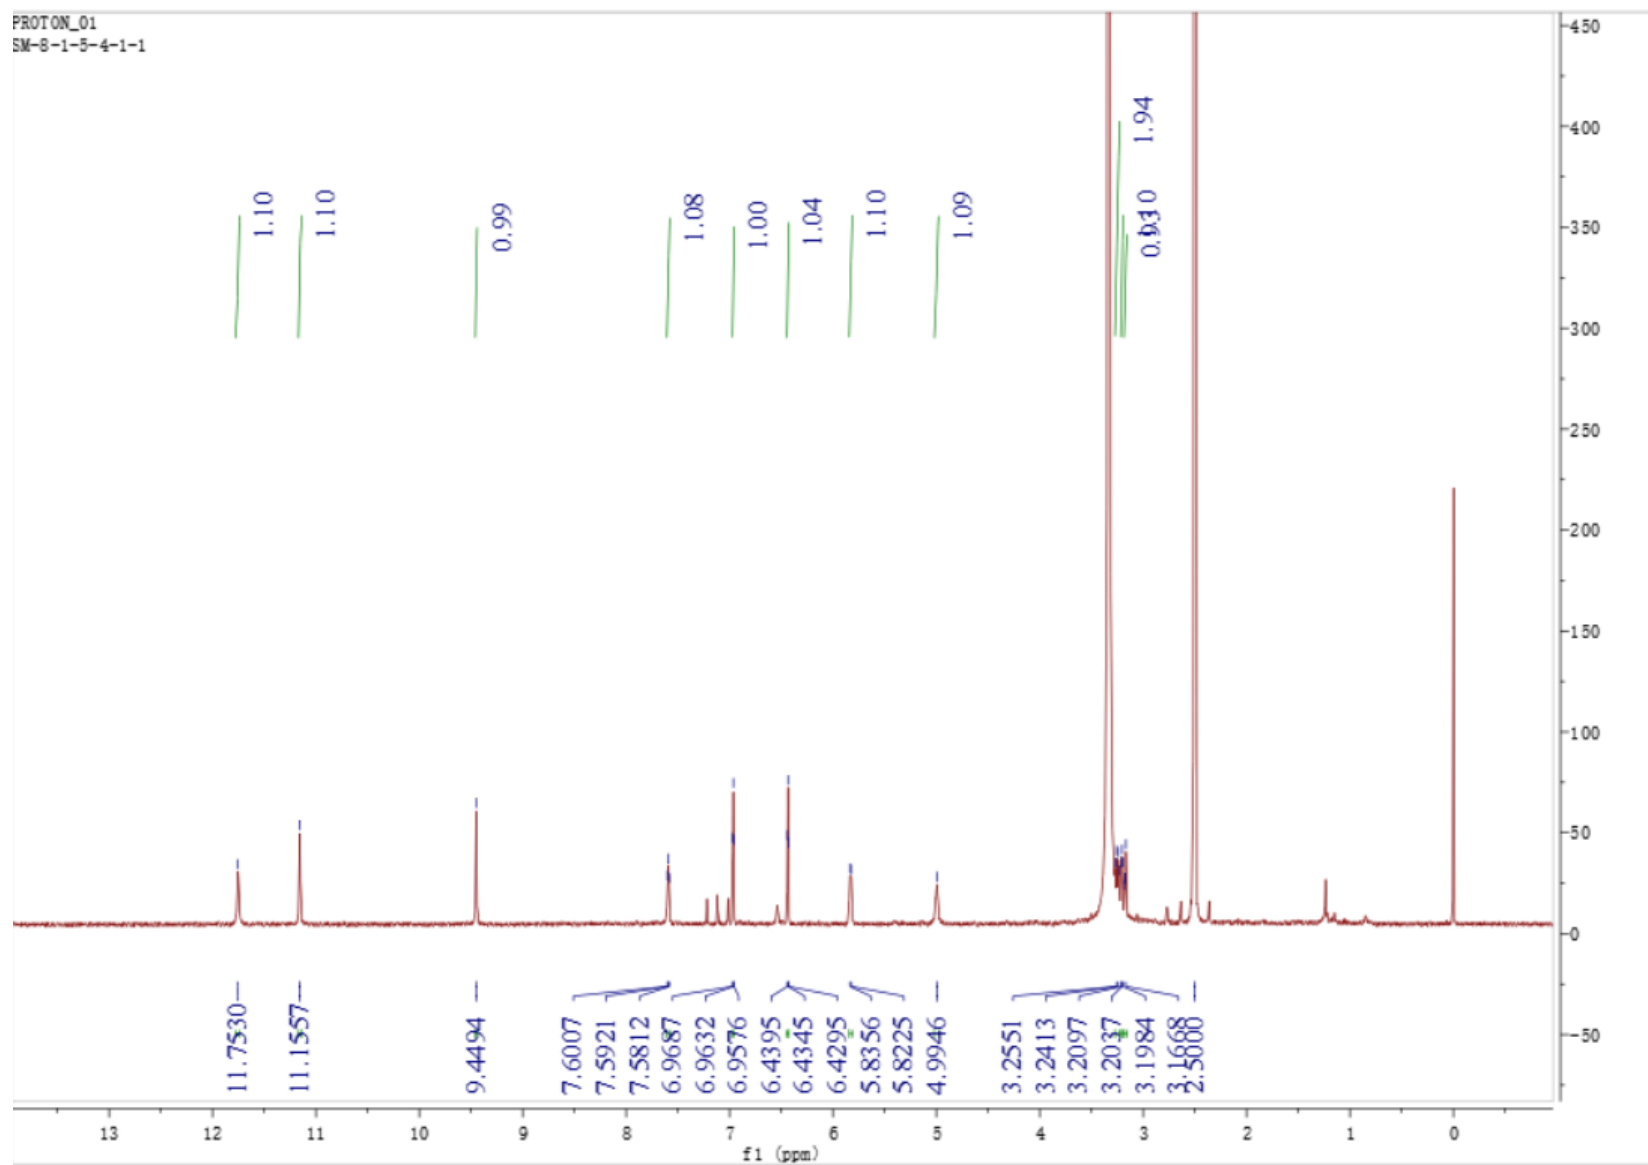

**Figure S40.**  $^1\text{H}$  NMR spectrum of compound **3** in  $\text{DMSO}-d_6$  (500 MHz).

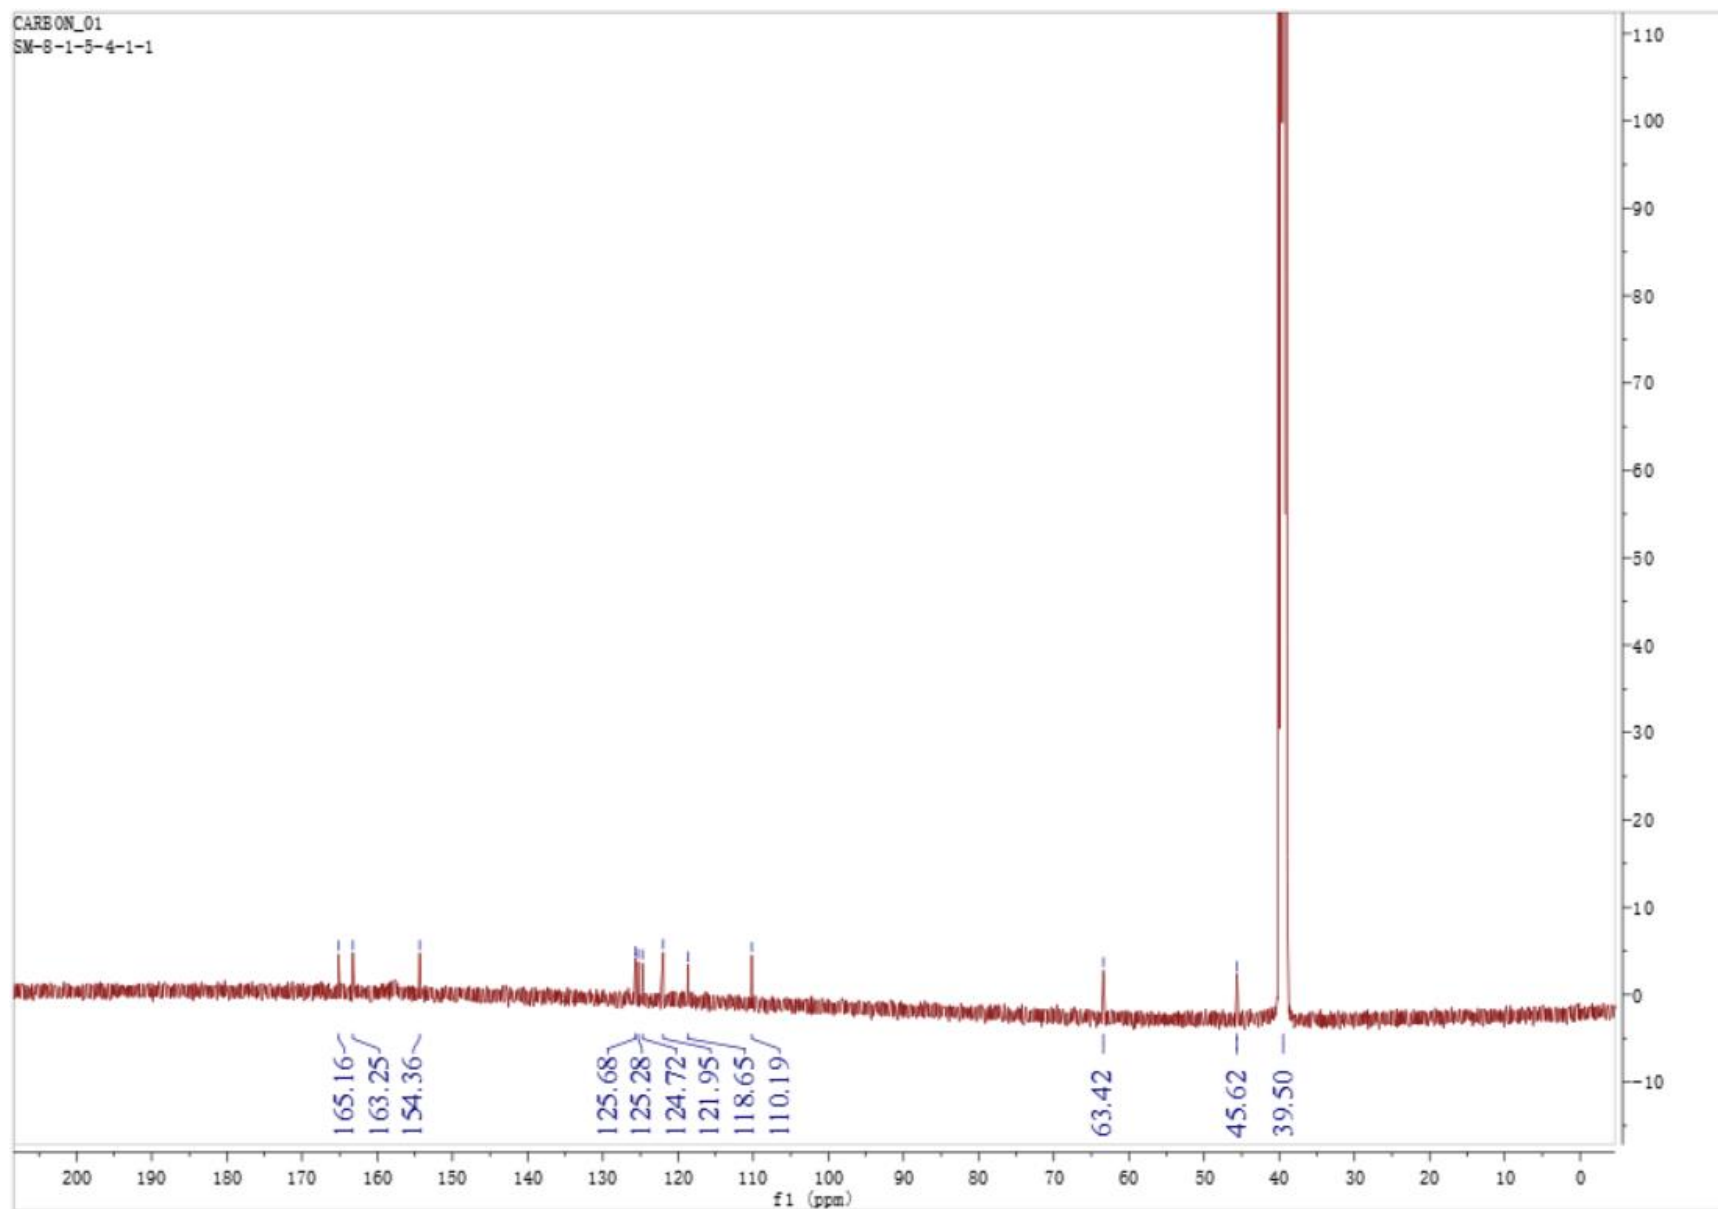

**Figure S41.**  $^{13}\text{C}$  NMR spectrum of compound **3** in  $\text{DMSO}-d_6$  (125 MHz).

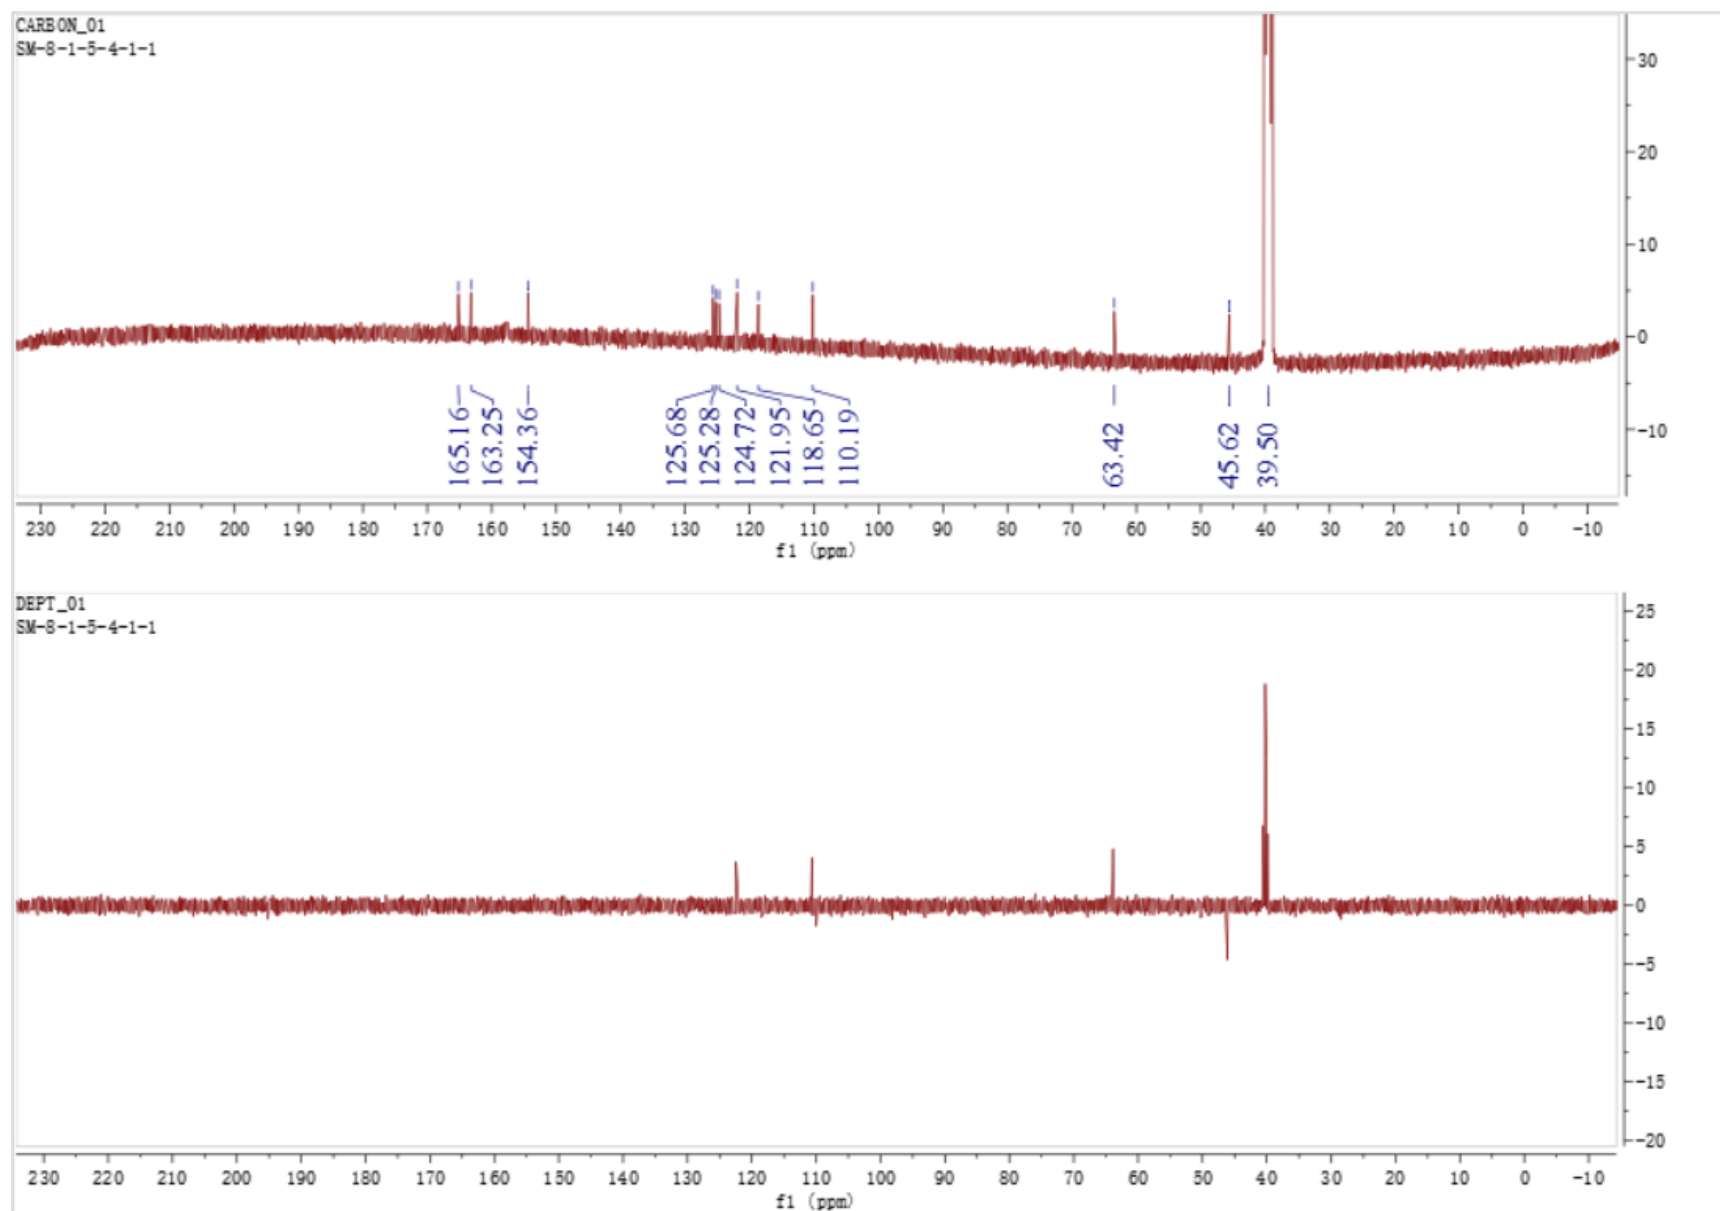

**Figure S42.** <sup>13</sup>C NMR and DEPT spectrum of compound **3** in DMSO-*d*<sub>6</sub> (125 MHz).



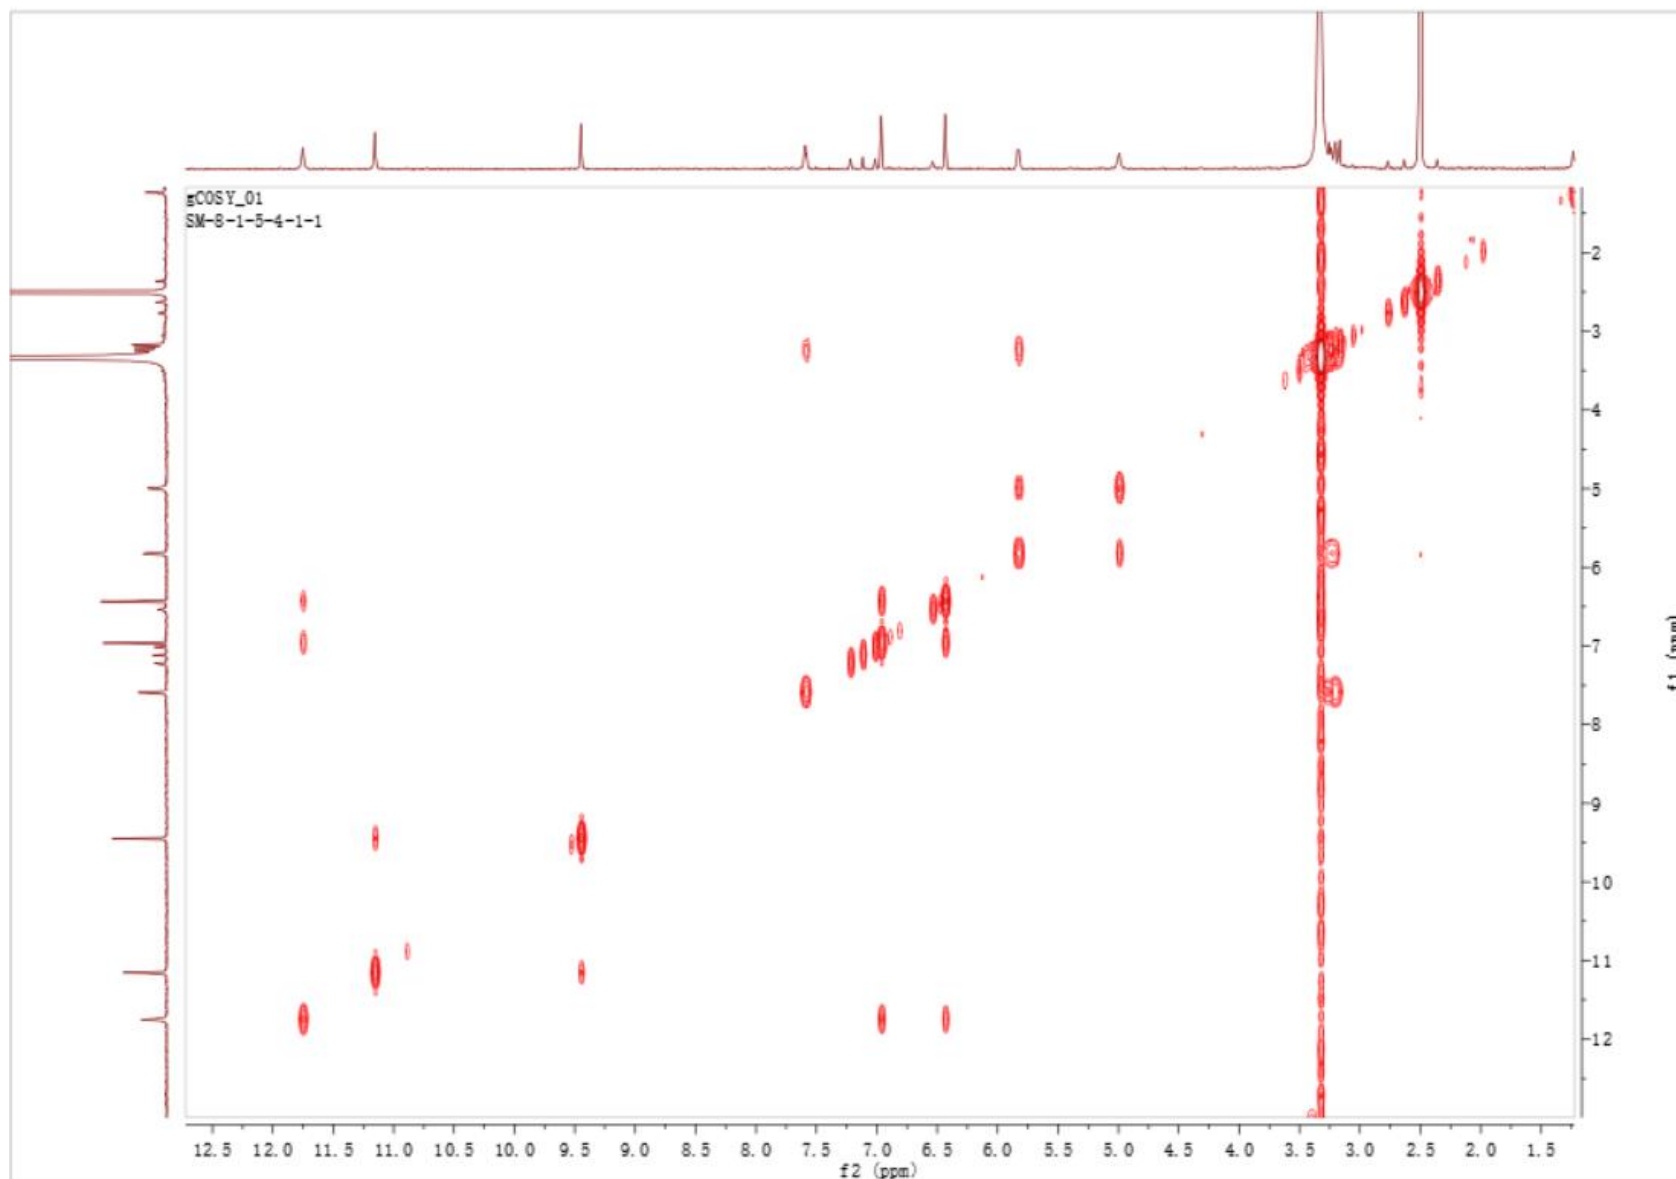

**Figure S43.**  $^1\text{H}$ - $^1\text{H}$  COSY spectrum of compound **3** in  $\text{DMSO}-d_6$  (500 MHz)

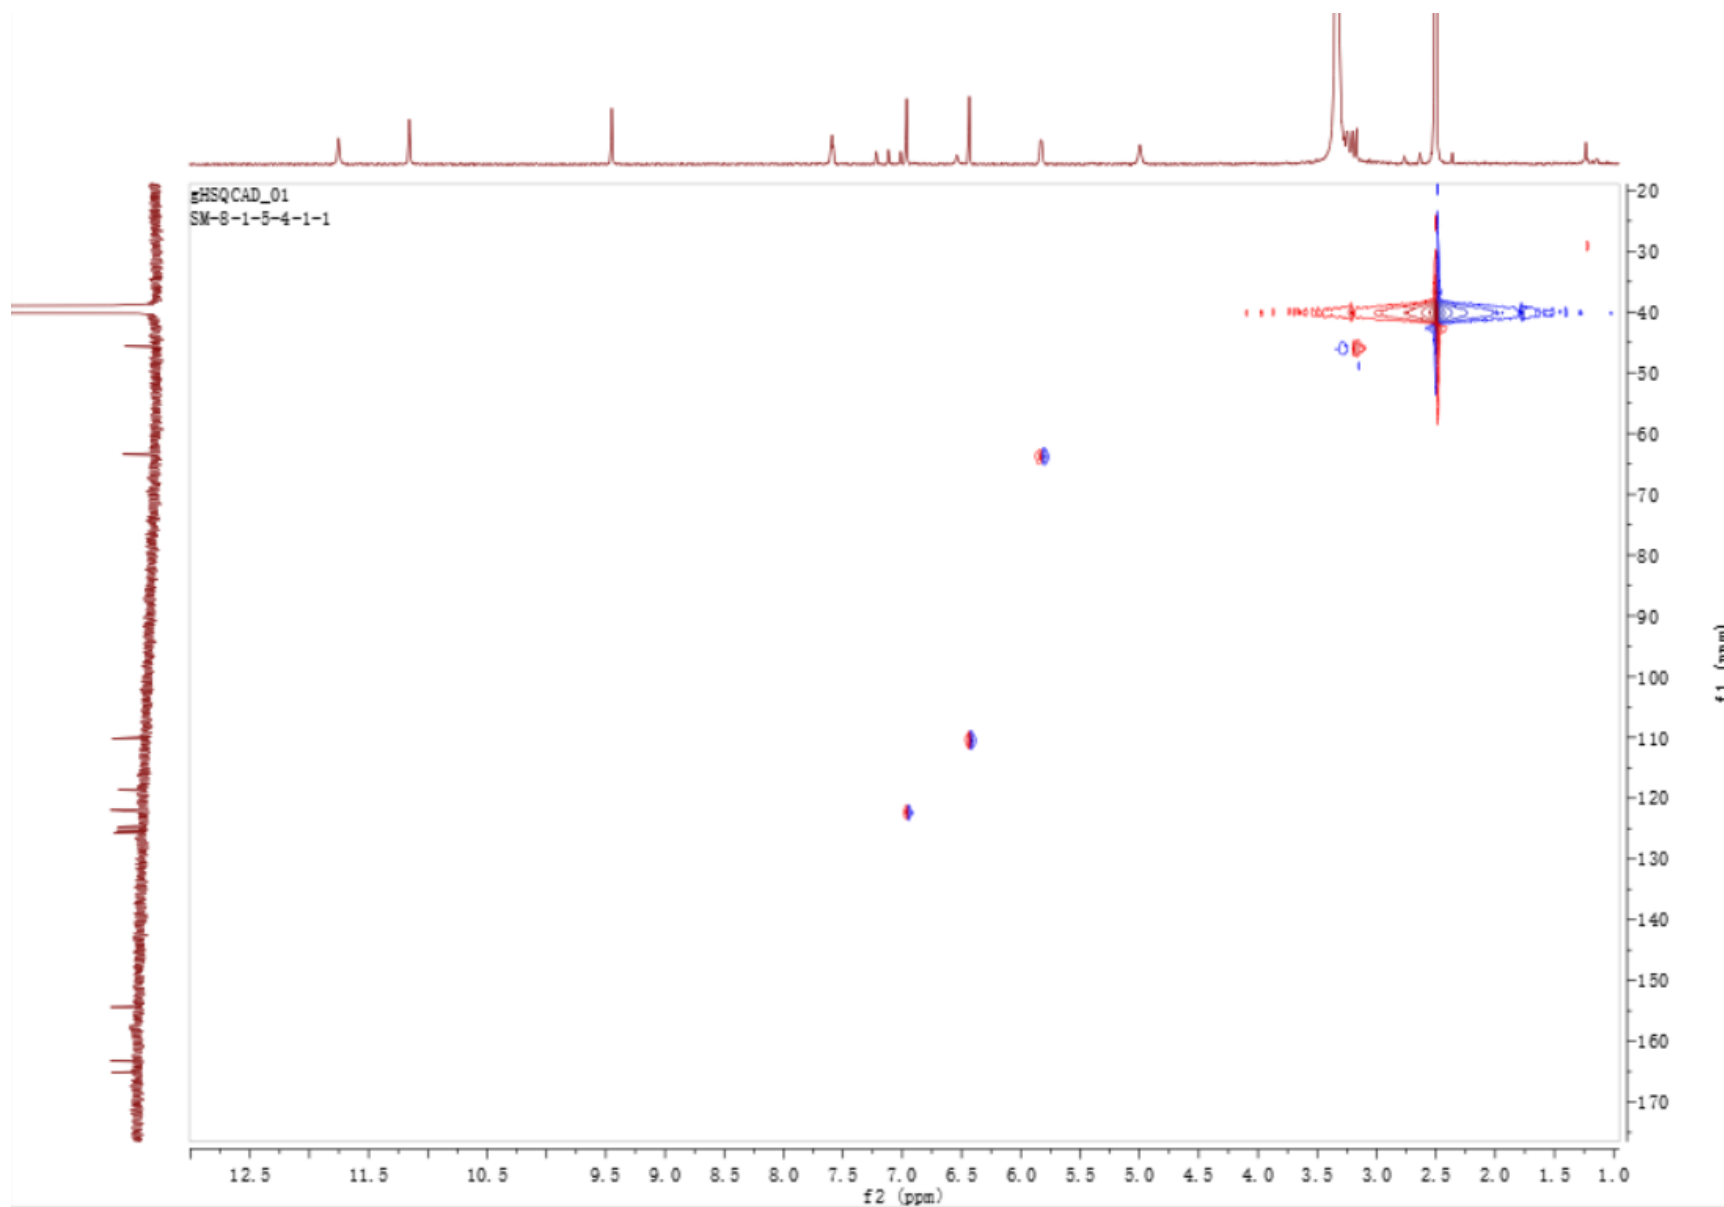

**Figure S44.** HSQC spectrum of compound **3** in DMSO- $d_6$  (500 MHz).

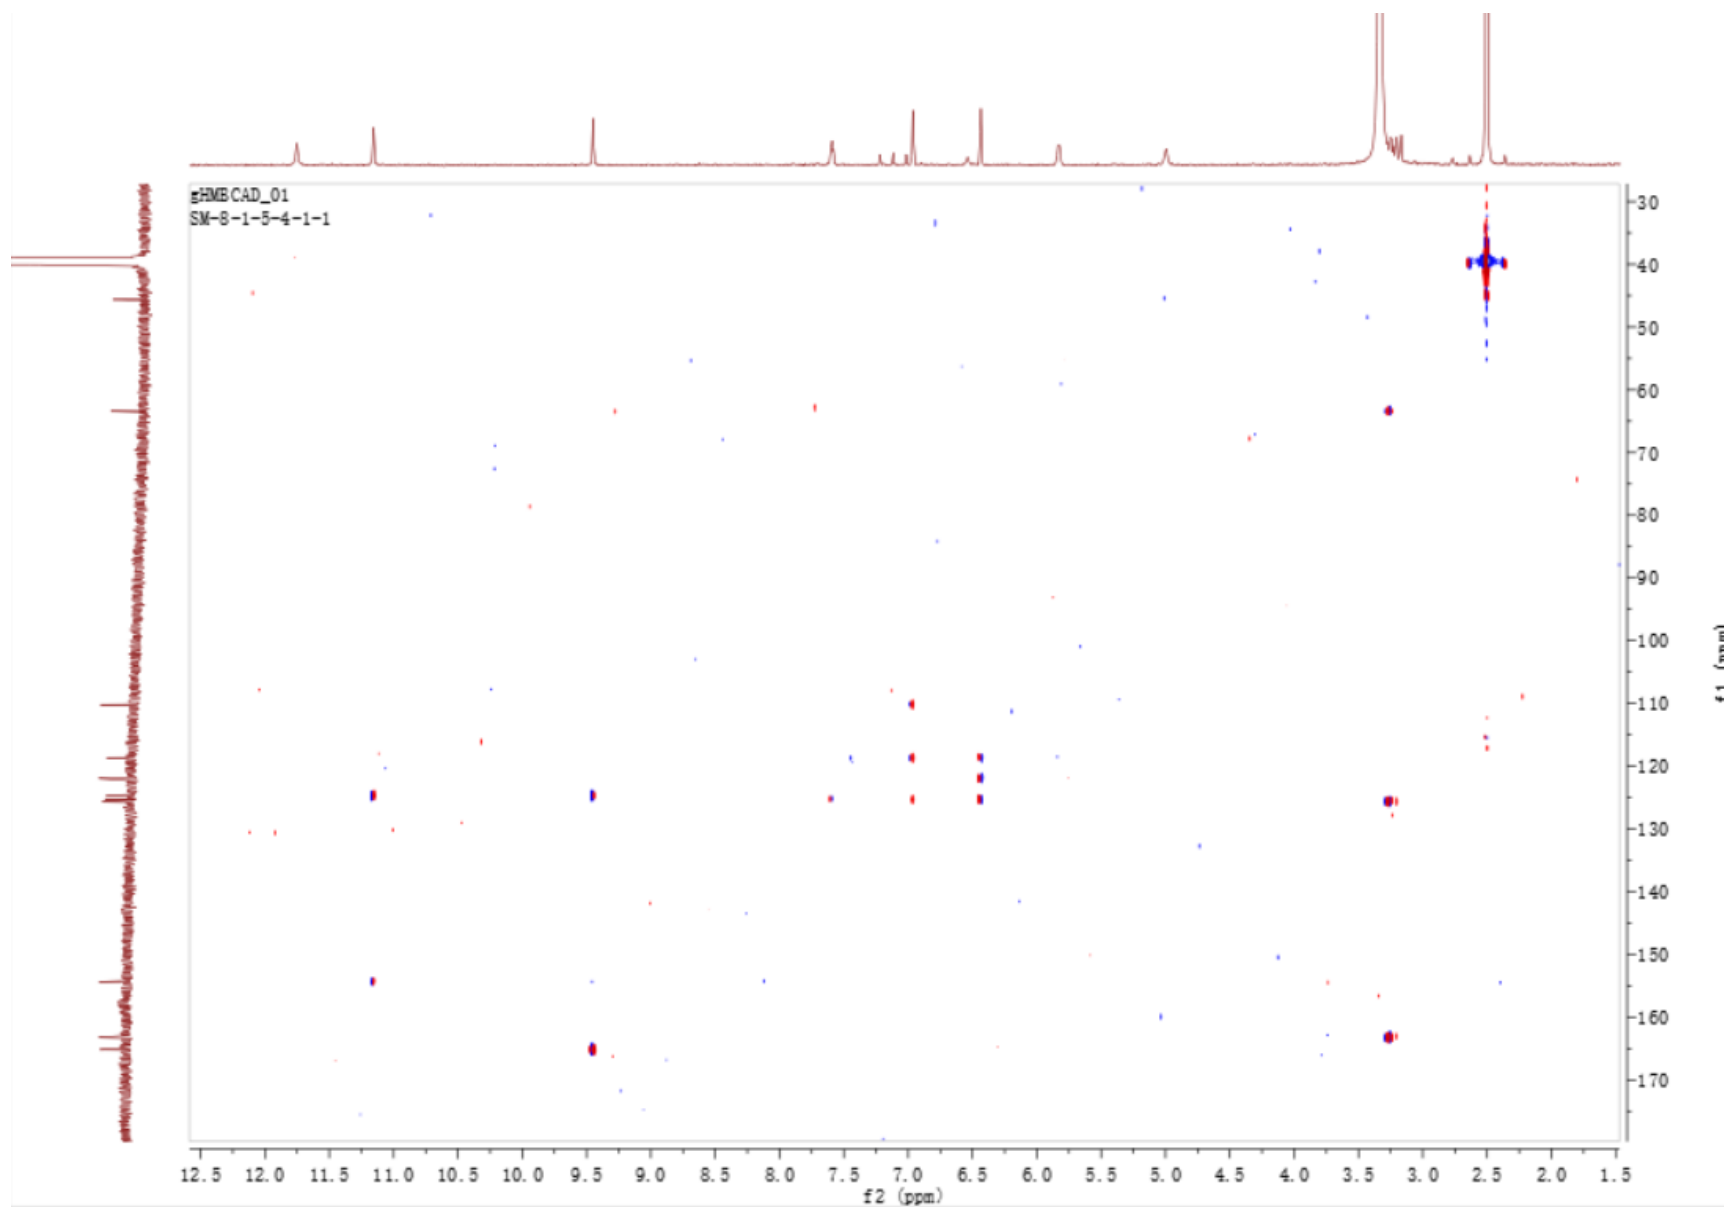

**Figure S45.** HMBC spectrum of compound **2** in DMSO-*d*<sub>6</sub> (500 MHz).

SM\_815411 #356 RT: 0.25 AV: 1 NL: 1.97E7  
T: FTMS + p ESI Full ms [200.0000-800.0000]

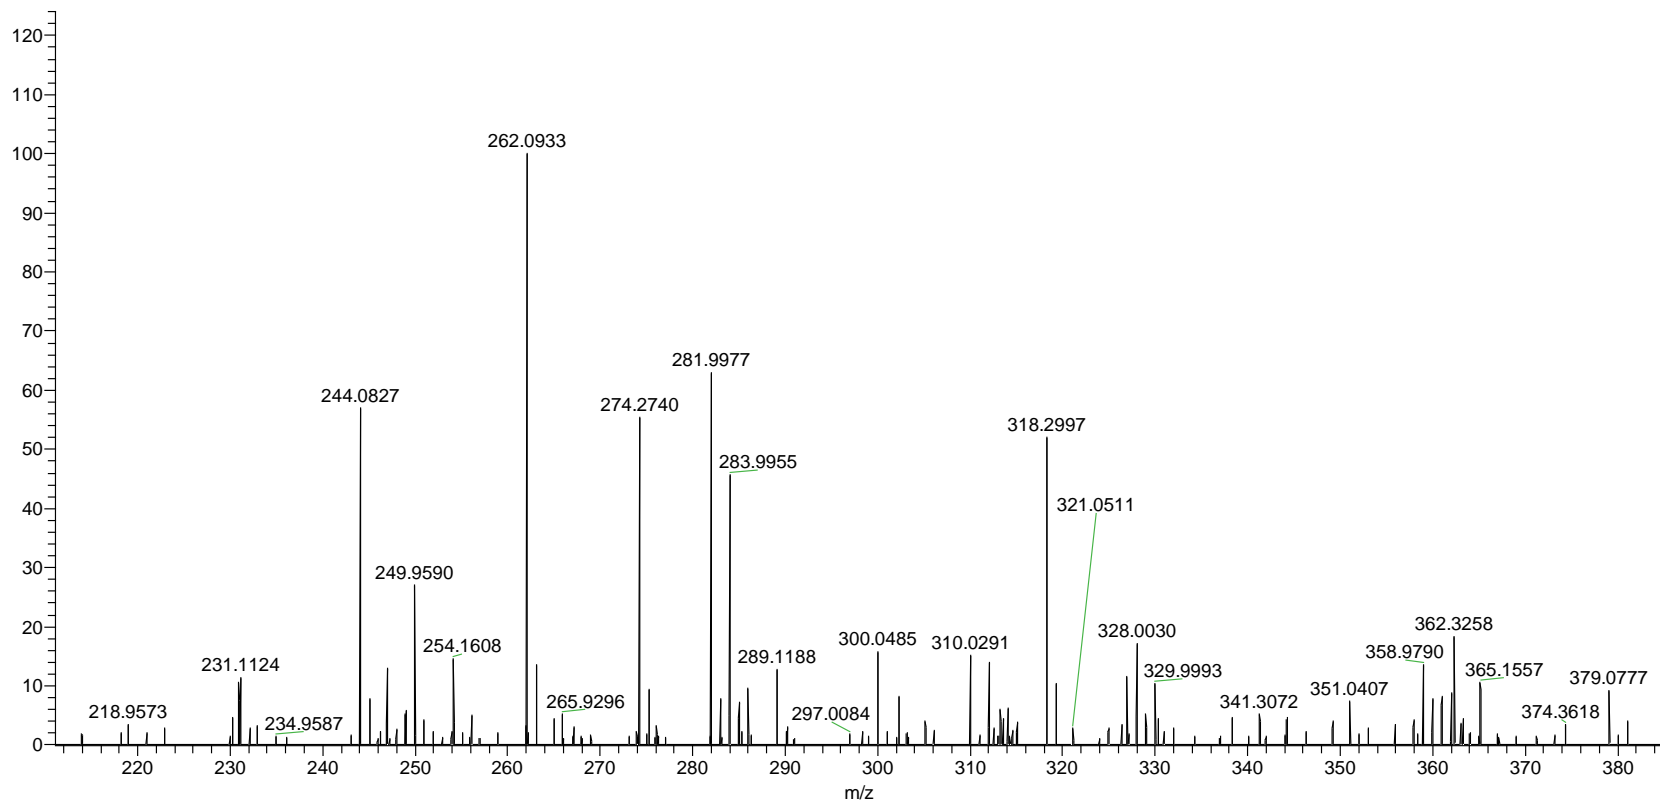

**Figure S46.** HRESIMS data of compound **3**.

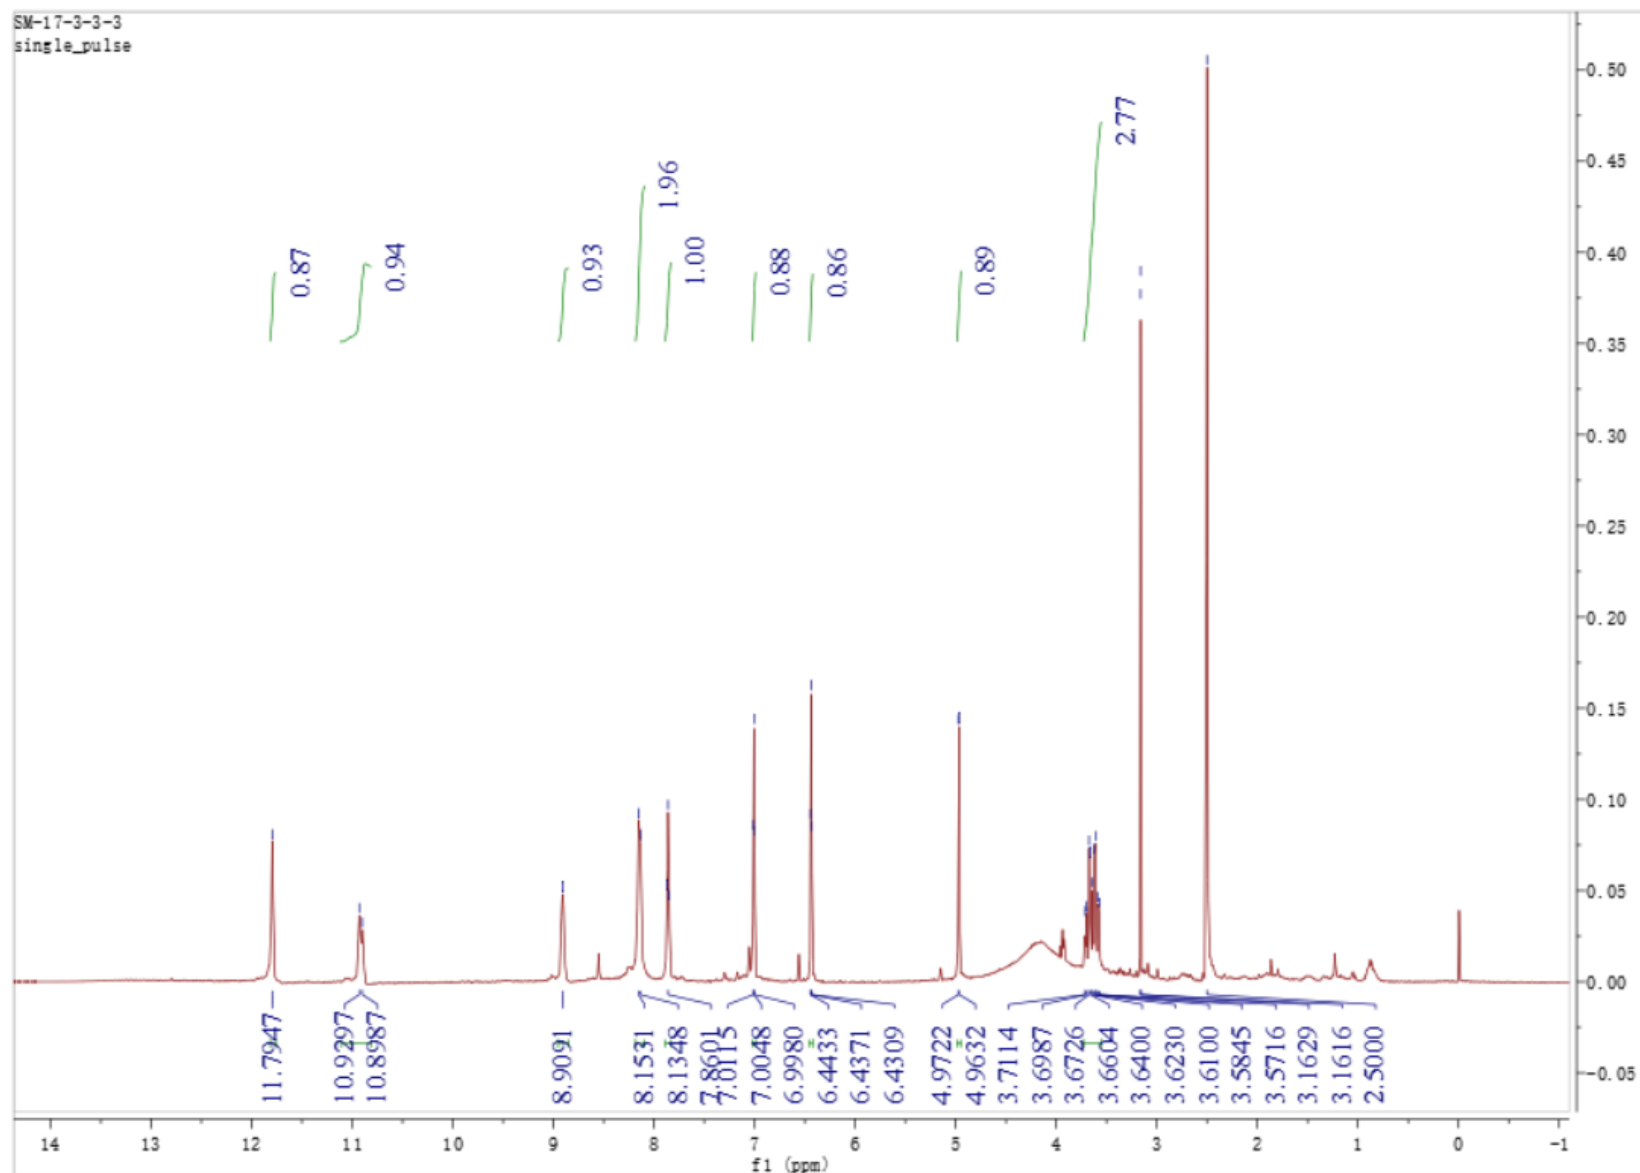

**Figure S47.**  $^1\text{H}$  NMR spectrum of compound **4** in  $\text{DMSO}-d_6$  (500 MHz)

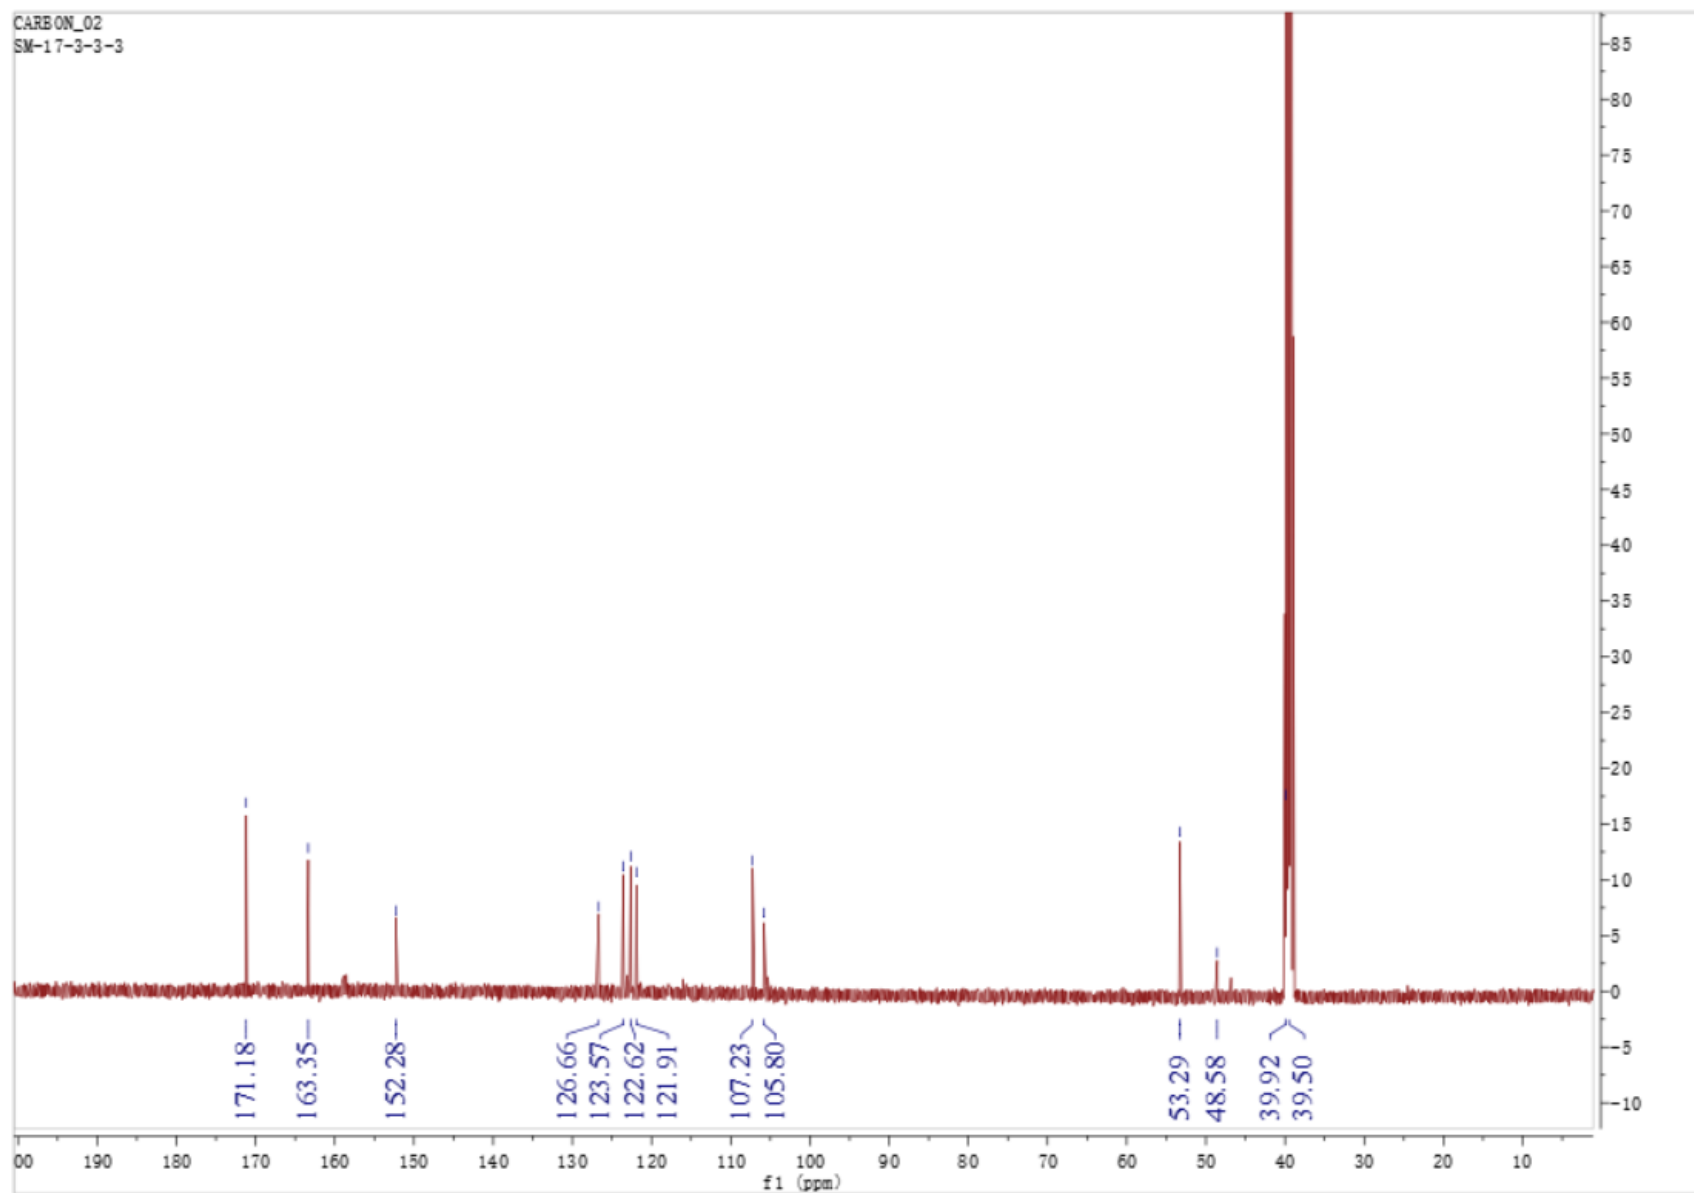

**Figure S48.**  $^{13}\text{C}$  NMR spectrum of compound **4** in  $\text{DMSO}-d_6$  (125 MHz).

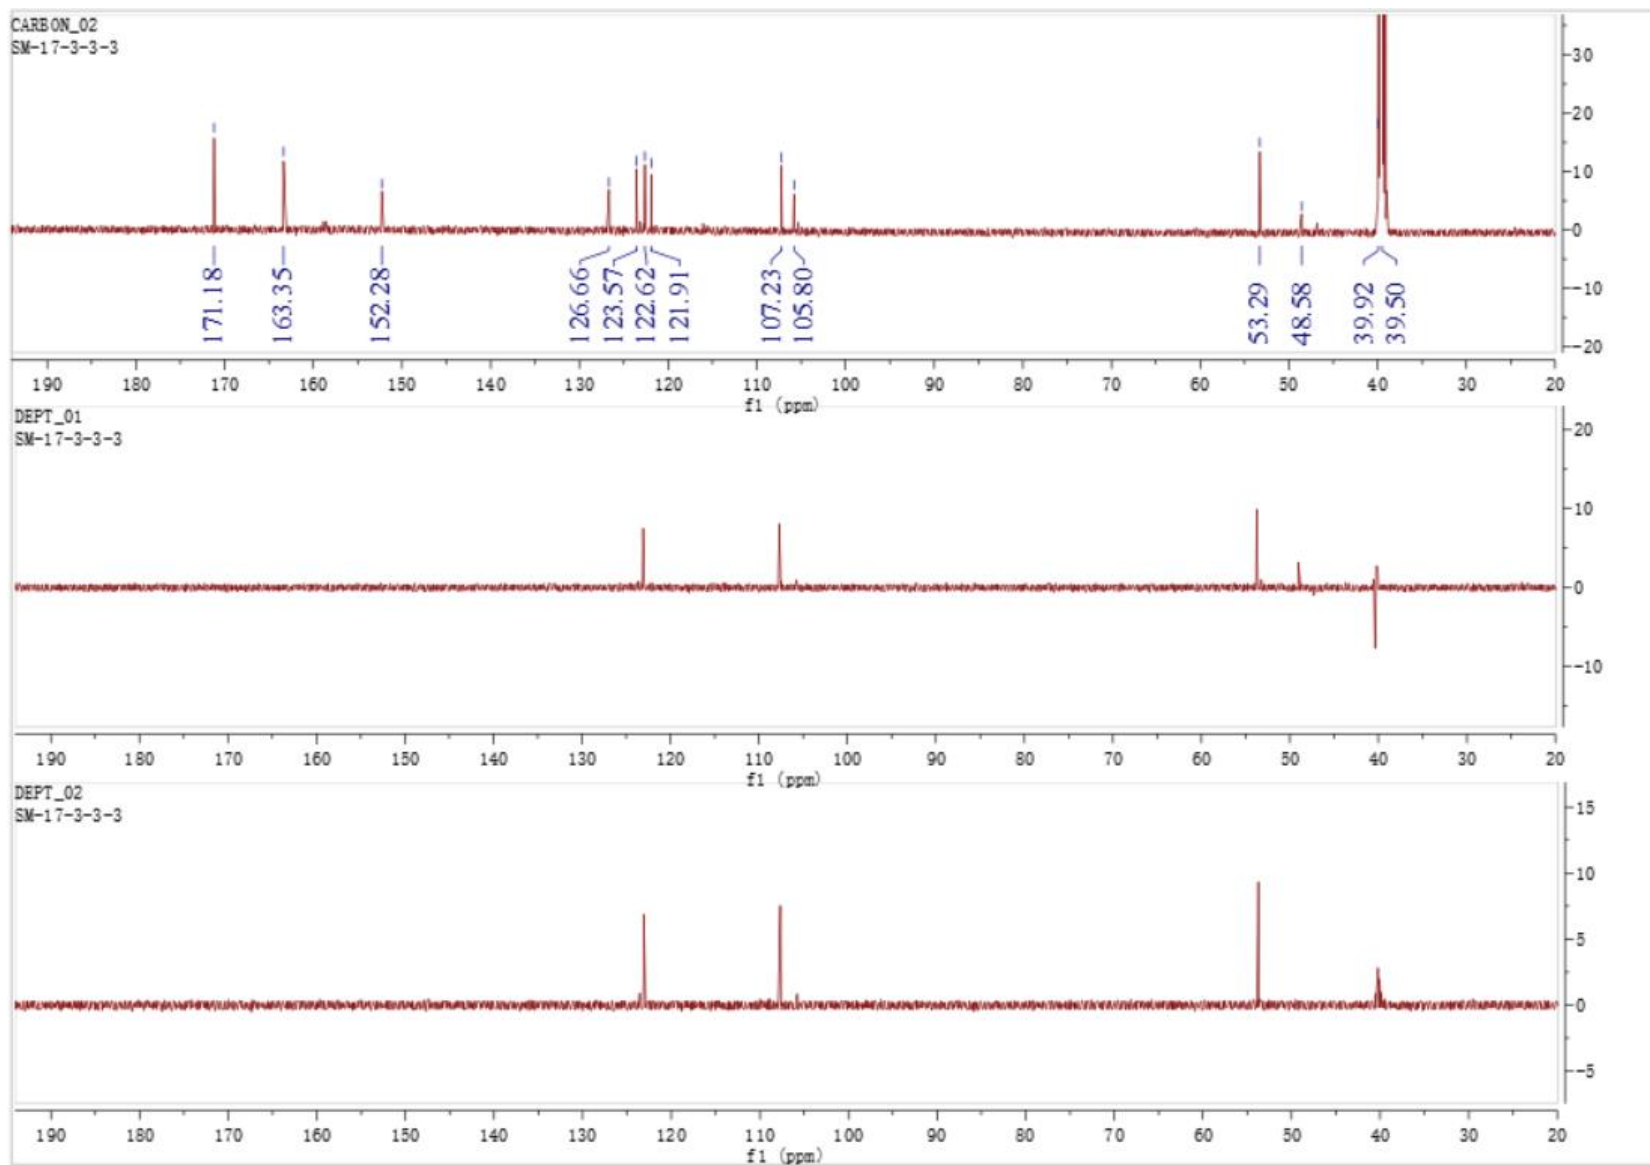

**Figure S49.**  $^{13}\text{C}$  NMR and DEPT spectrum of compound **4** in  $\text{DMSO-}d_6$  (125 MHz)

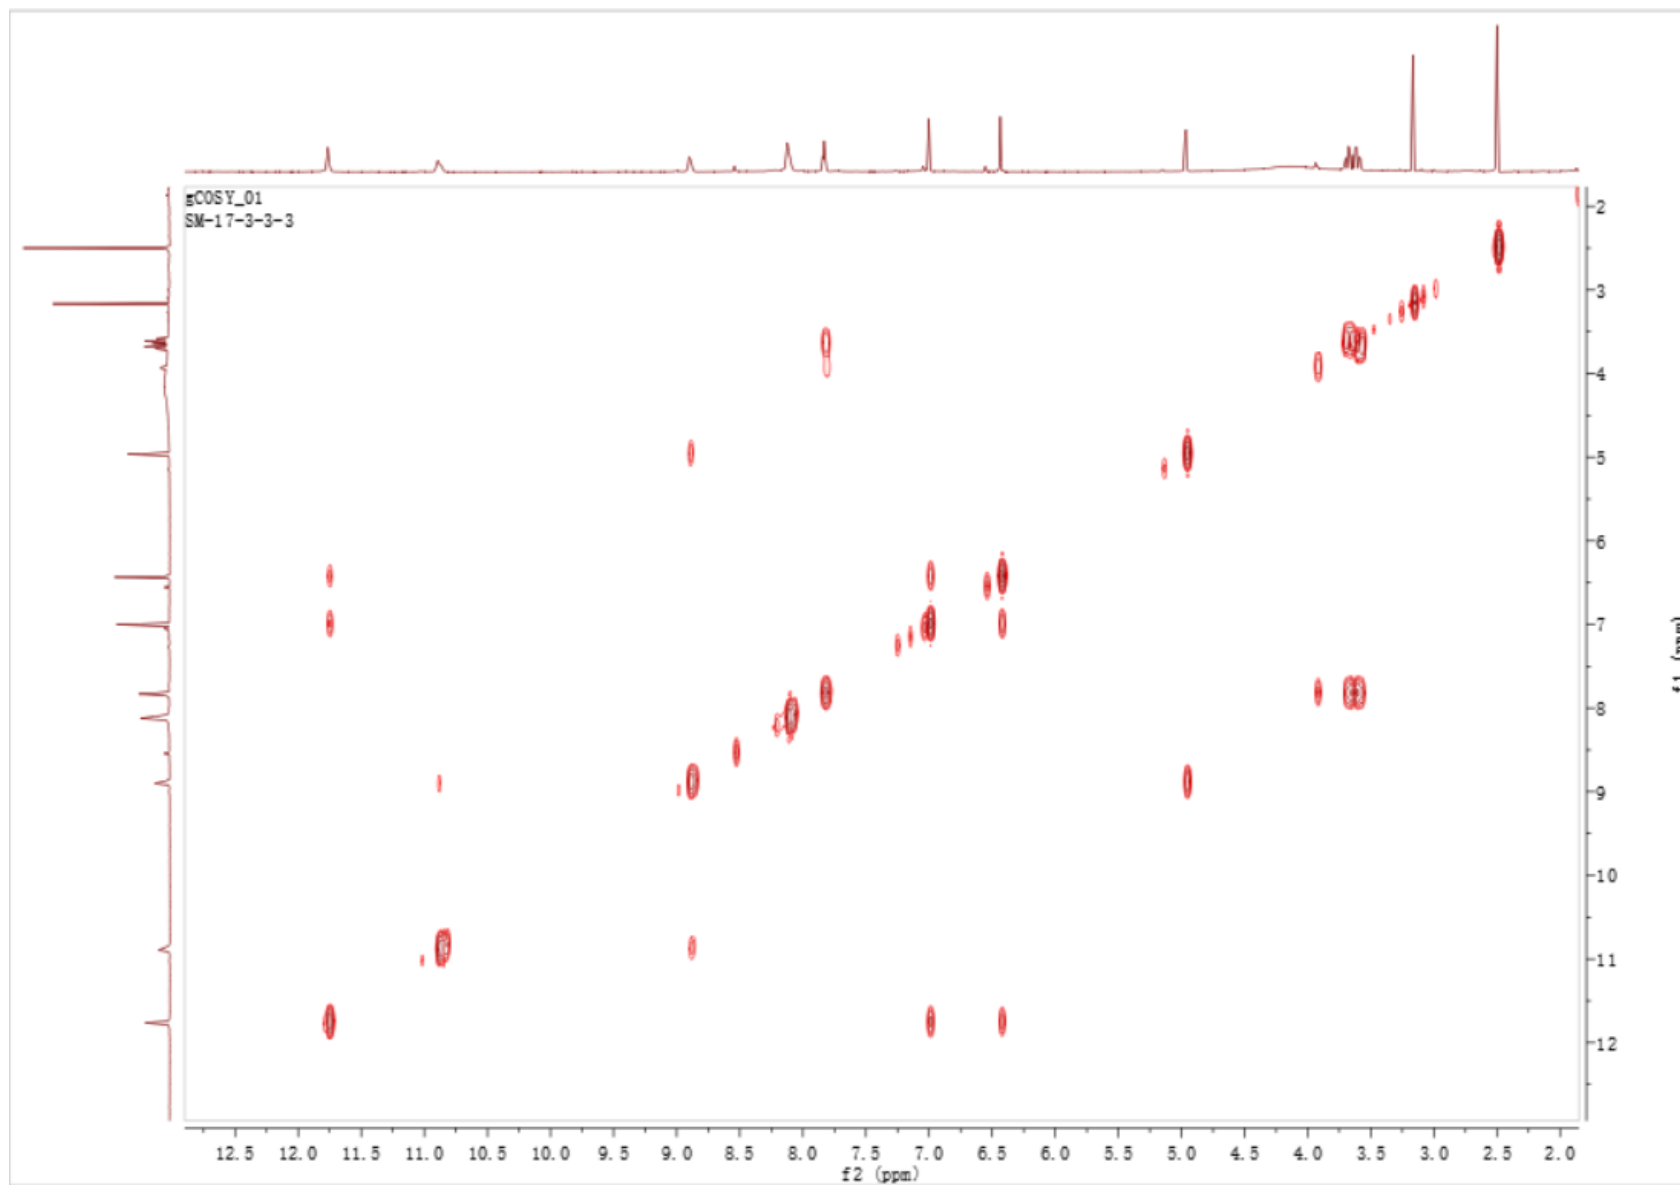

**Figure S50.**  $^1\text{H}$ - $^1\text{H}$  COSY spectrum of compound **4** in  $\text{DMSO}-d_6$  (500 MHz).



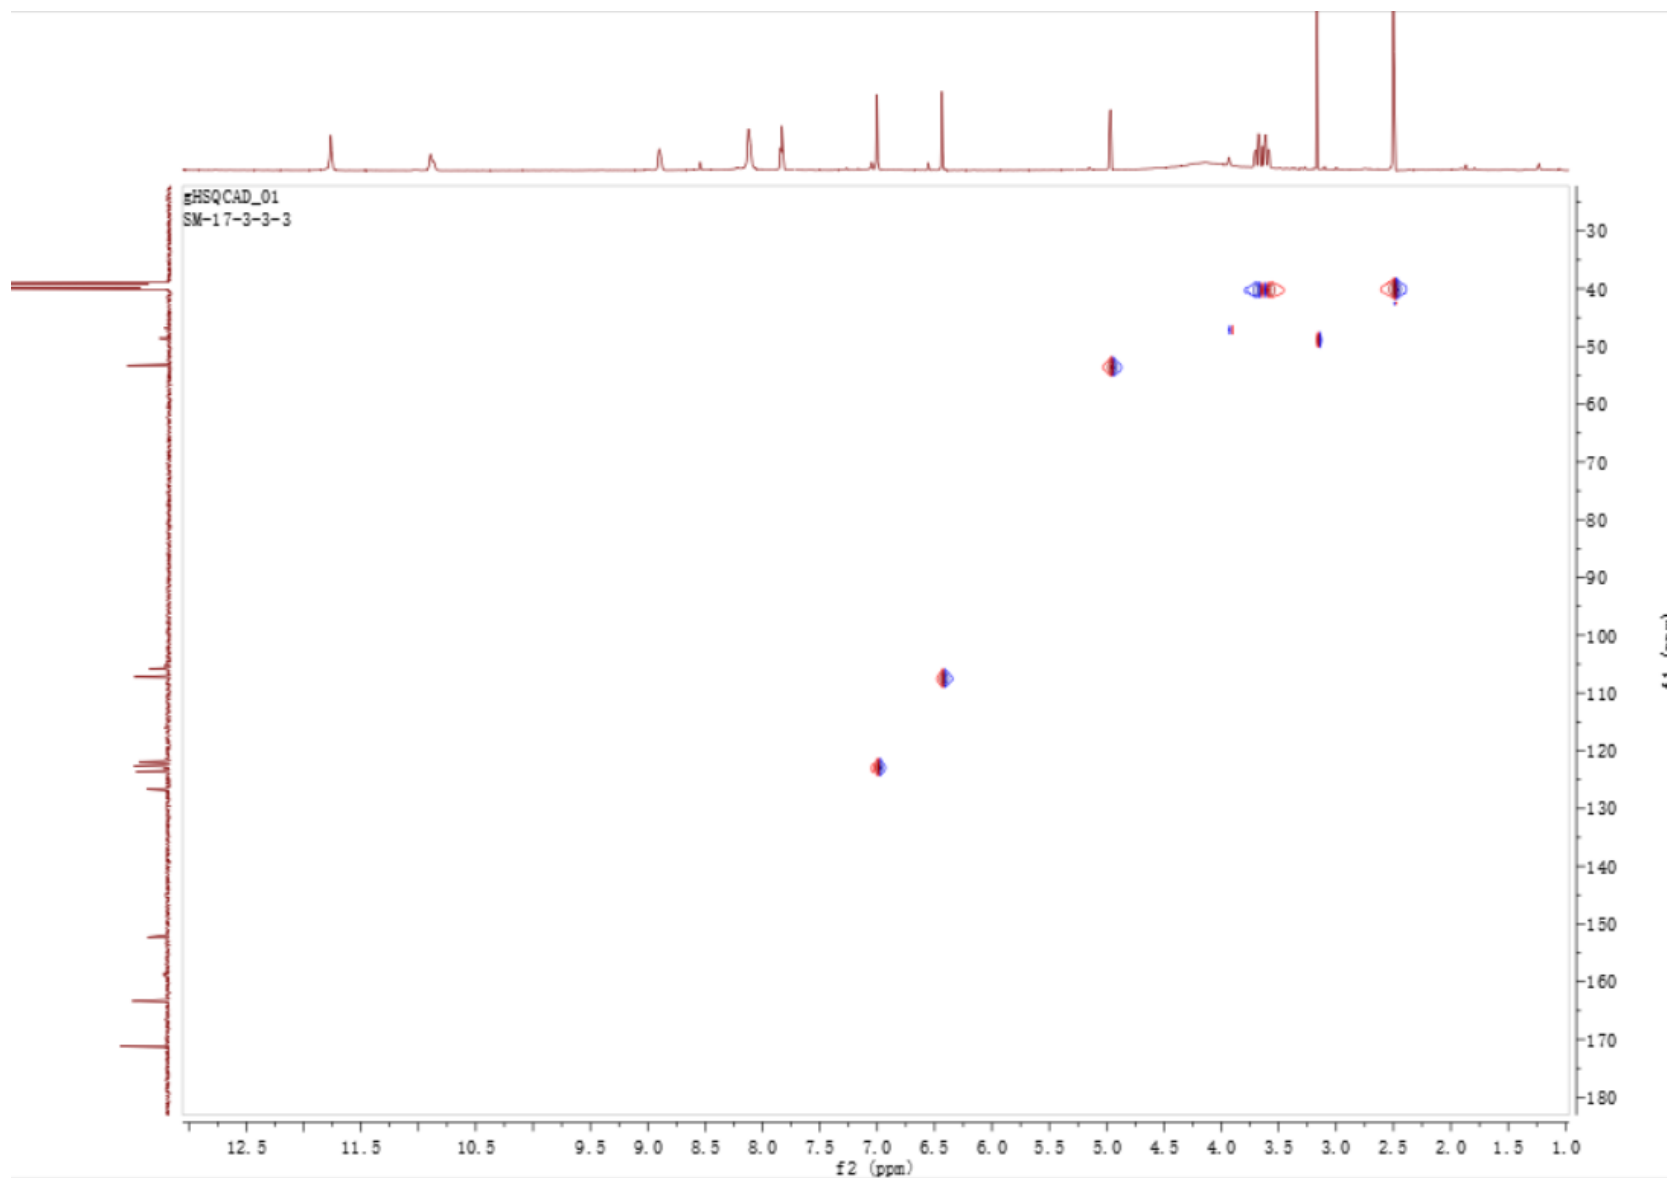

**Figure S51.** HSQC spectrum of compound **4** in DMSO-*d*<sub>6</sub> (500 MHz).

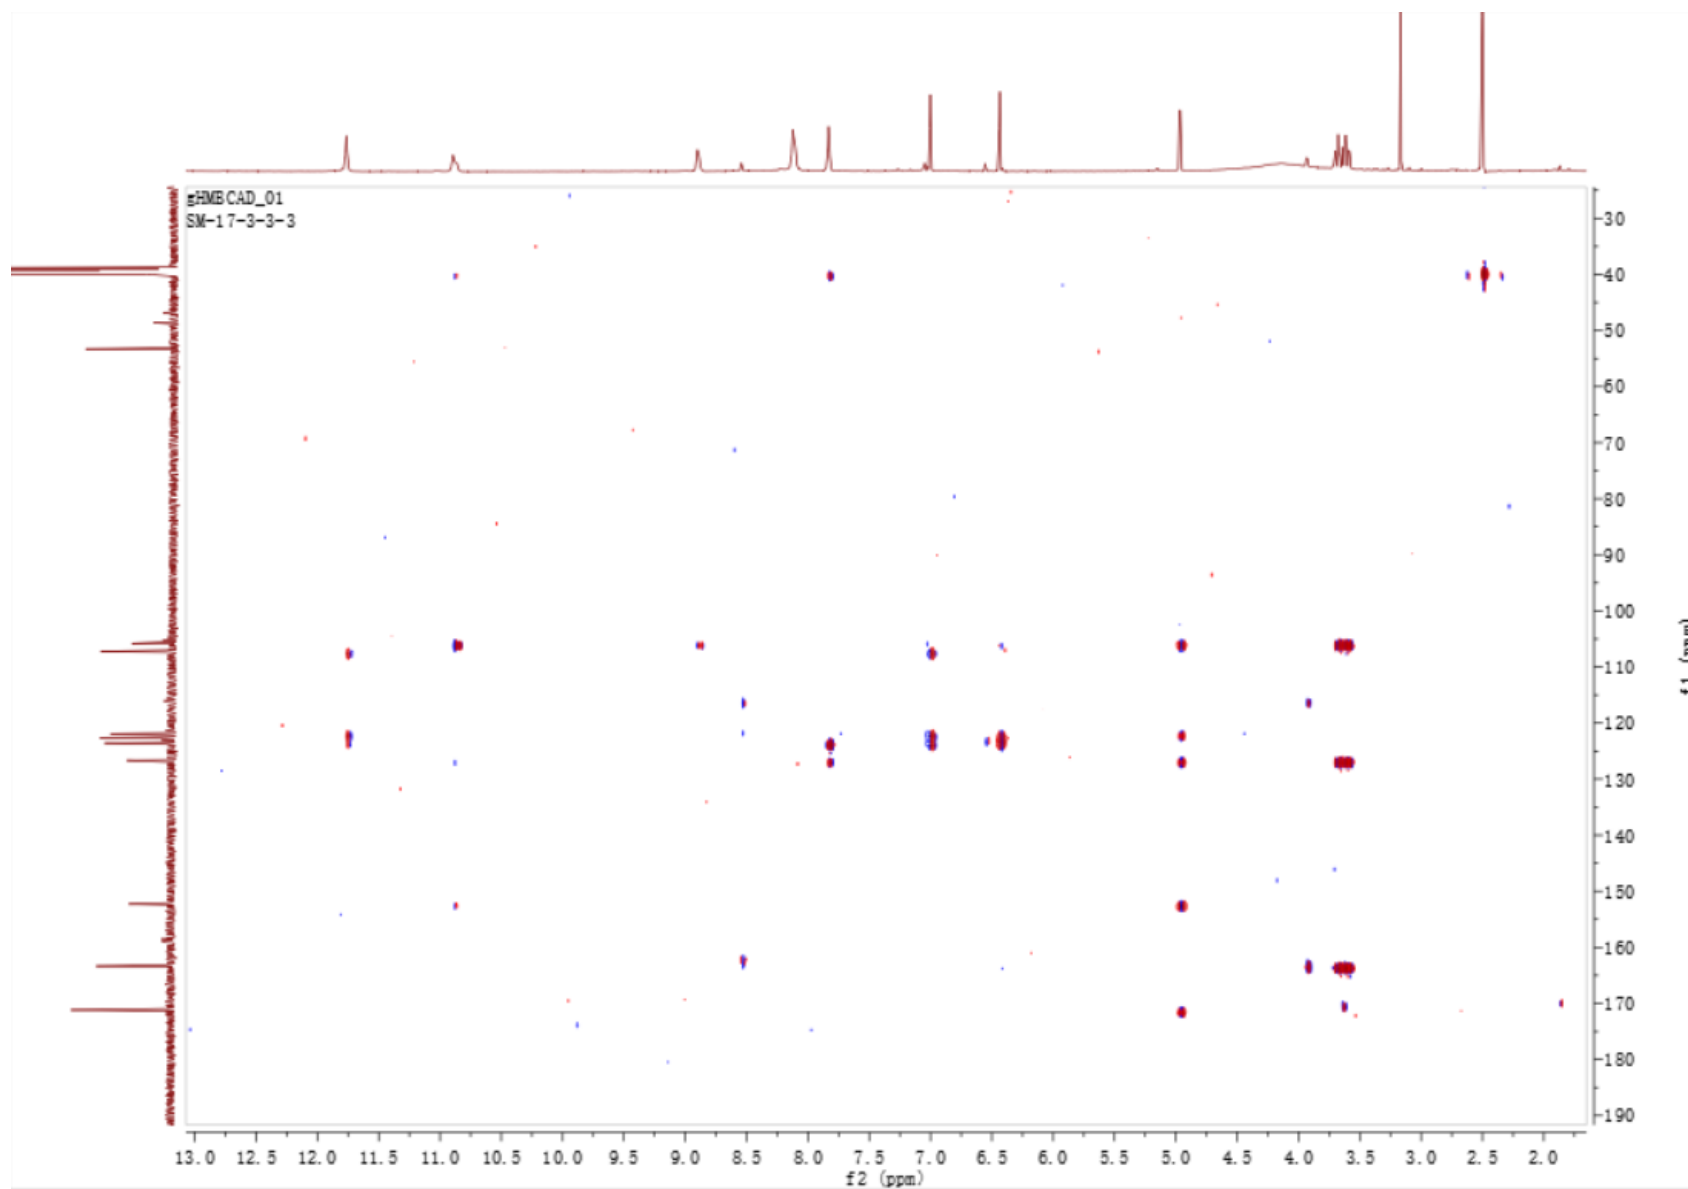

**Figure S52.** HMBC spectrum of compound **4** in DMSO- $d_6$  (500 MHz).

SM\_17\_333 #481 RT: 0.35 AV: 1 NL: 1.06E8  
T: FTMS + p ESI Full ms [250.0000-800.0000]

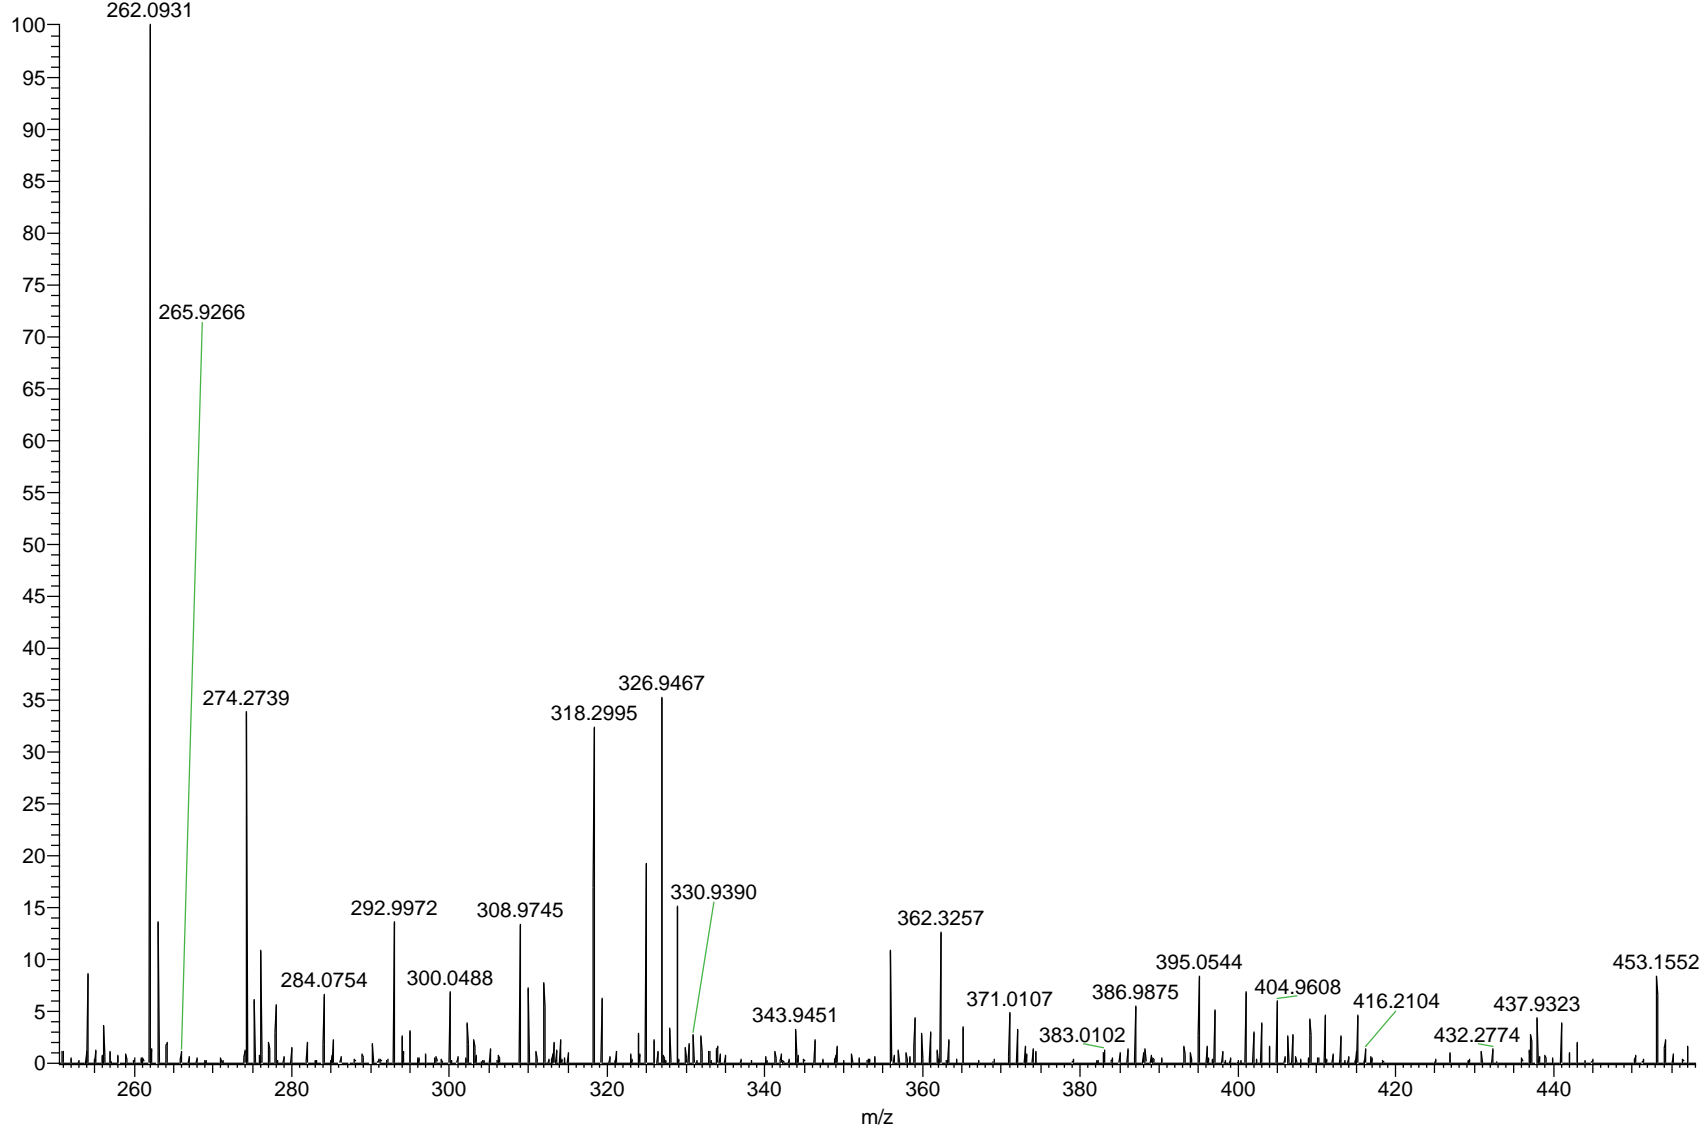

Figure S53. HRESIMS data of compound 4.

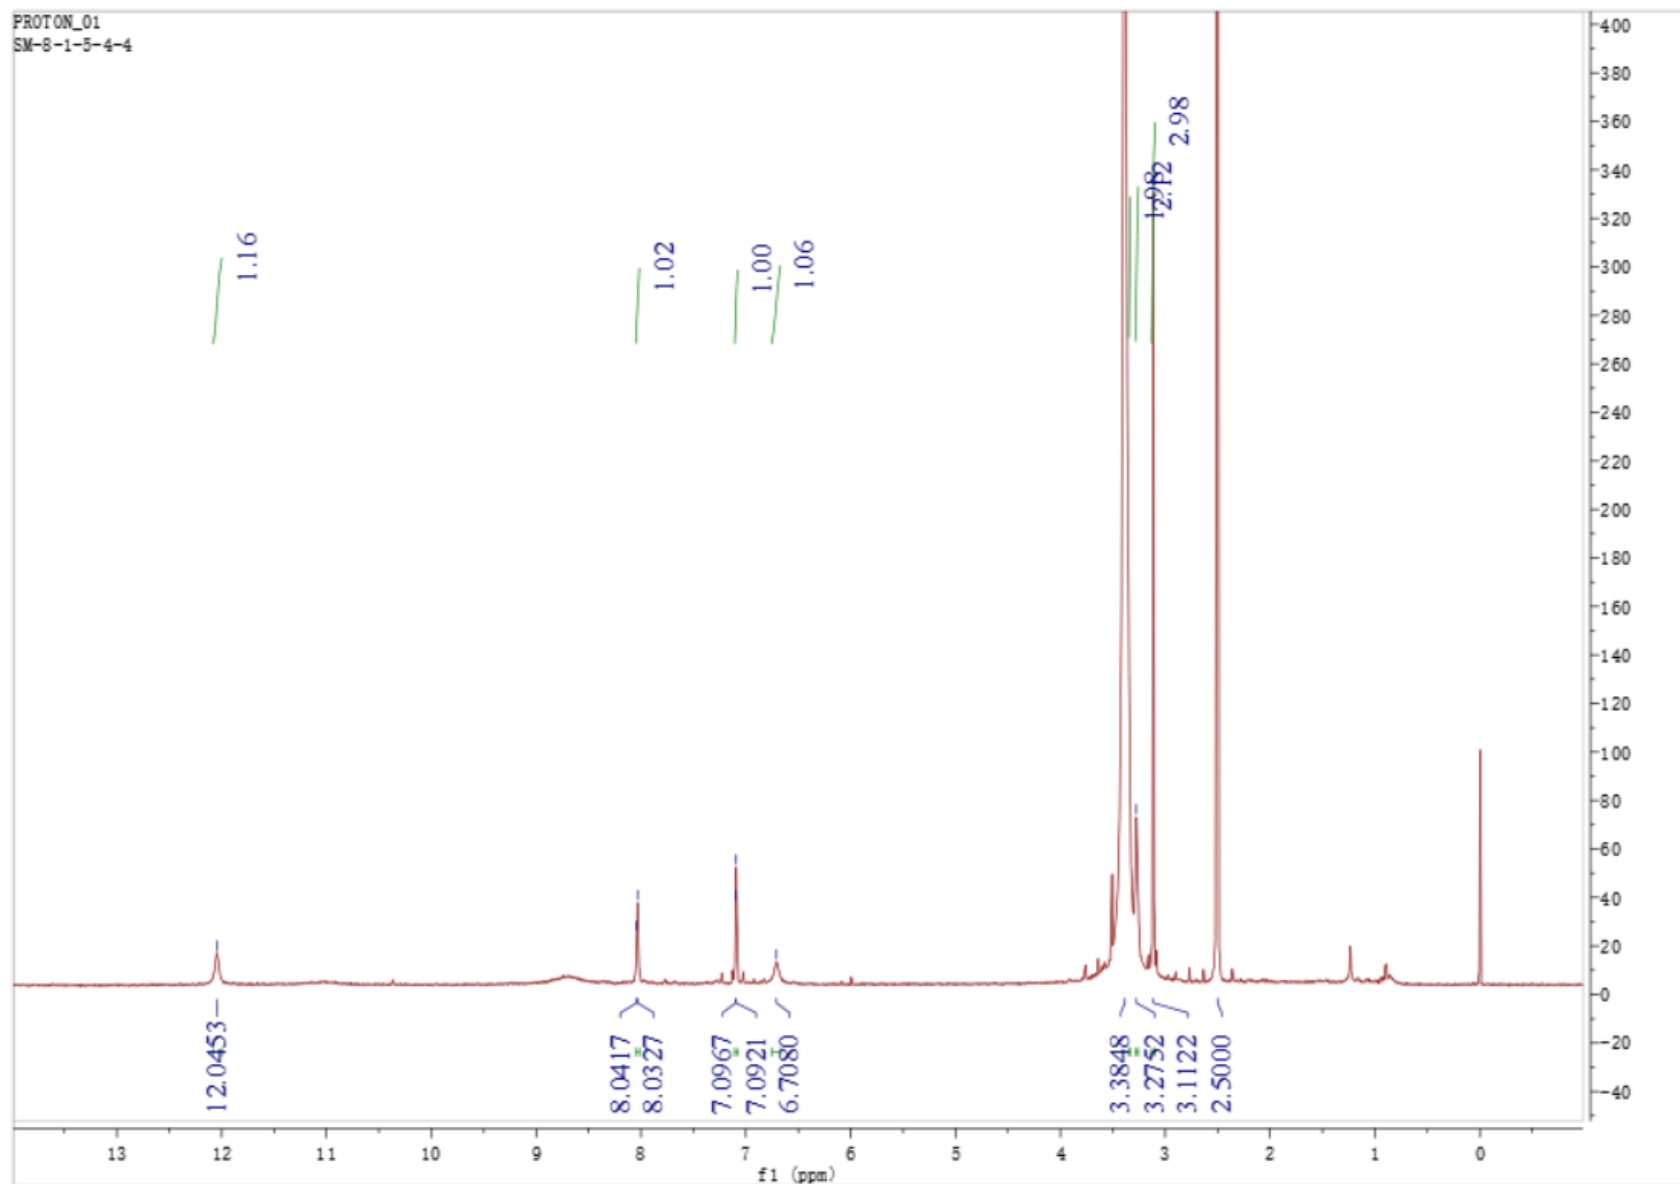

**Figure S54.**  $^1\text{H}$  NMR spectrum of compound **5** in  $\text{DMSO}-d_6$  (500 MHz).

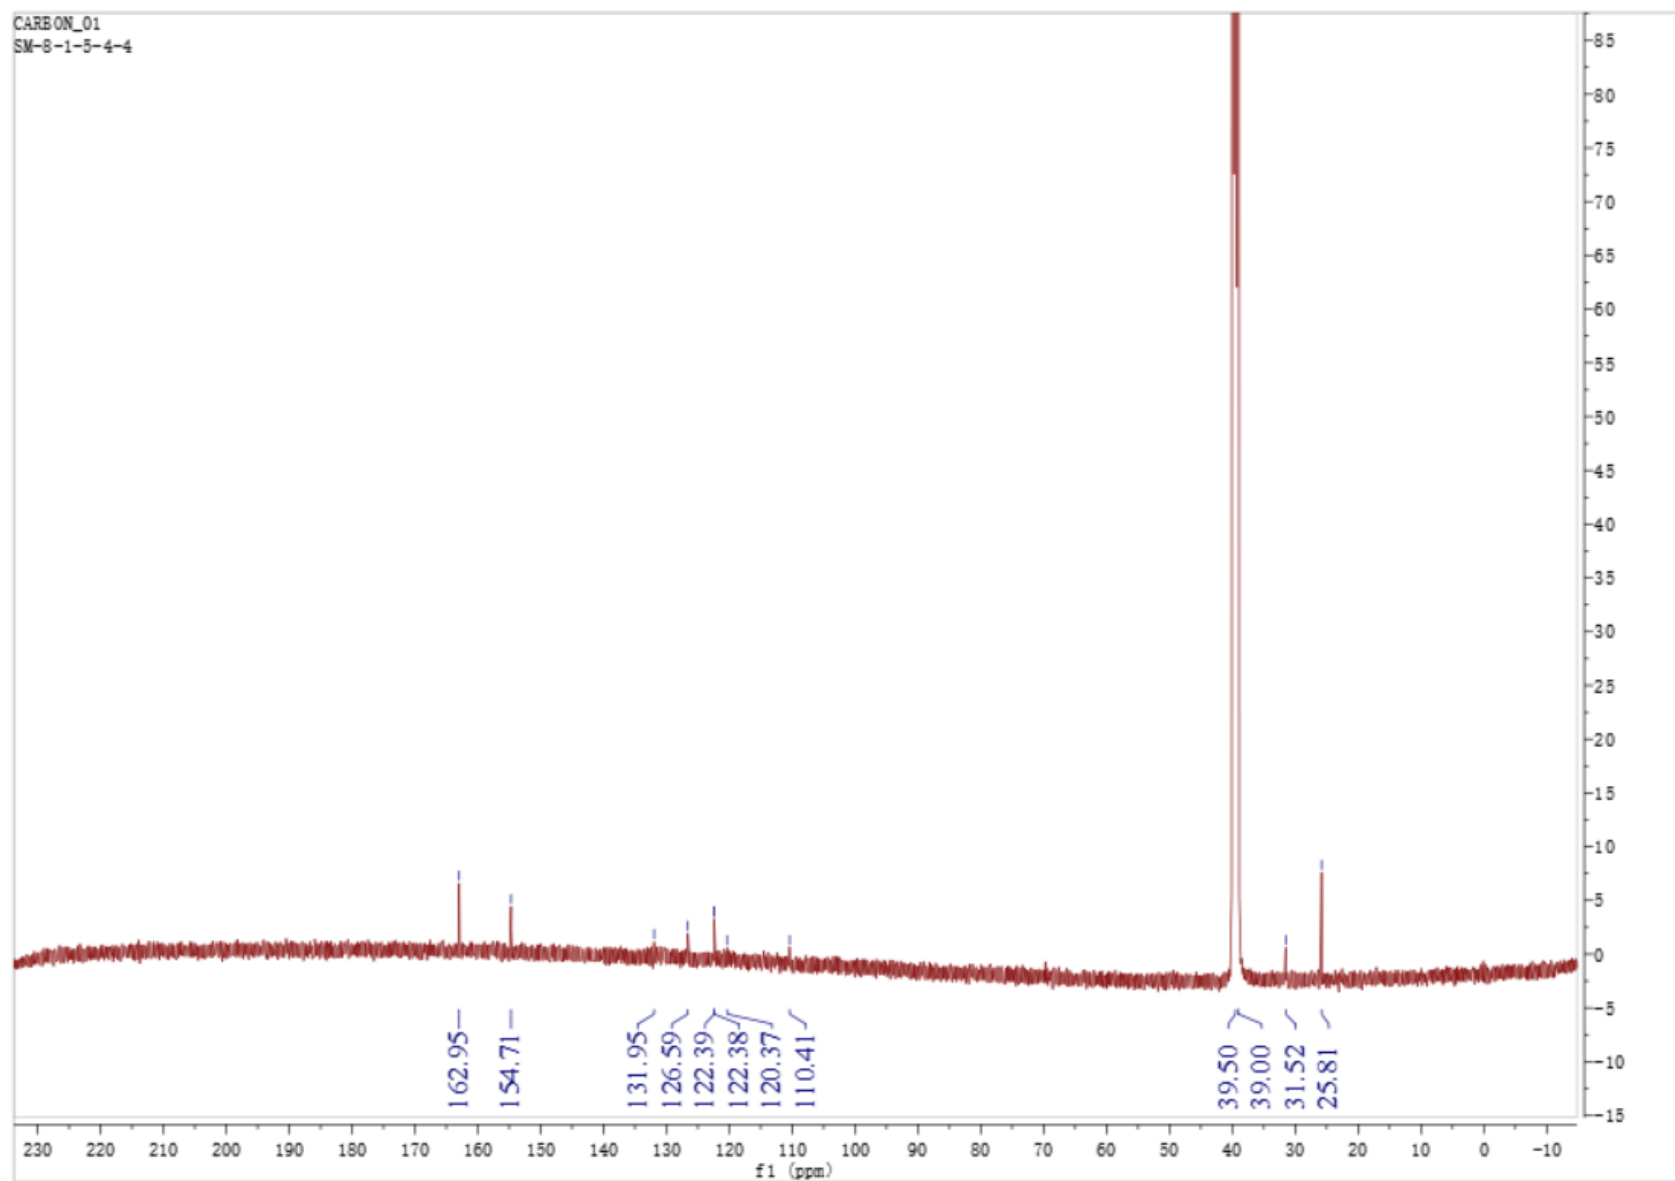

**Figure S55.**  $^{13}\text{C}$  NMR spectrum of compound **5** in  $\text{DMSO}-d_6$  (125 MHz).

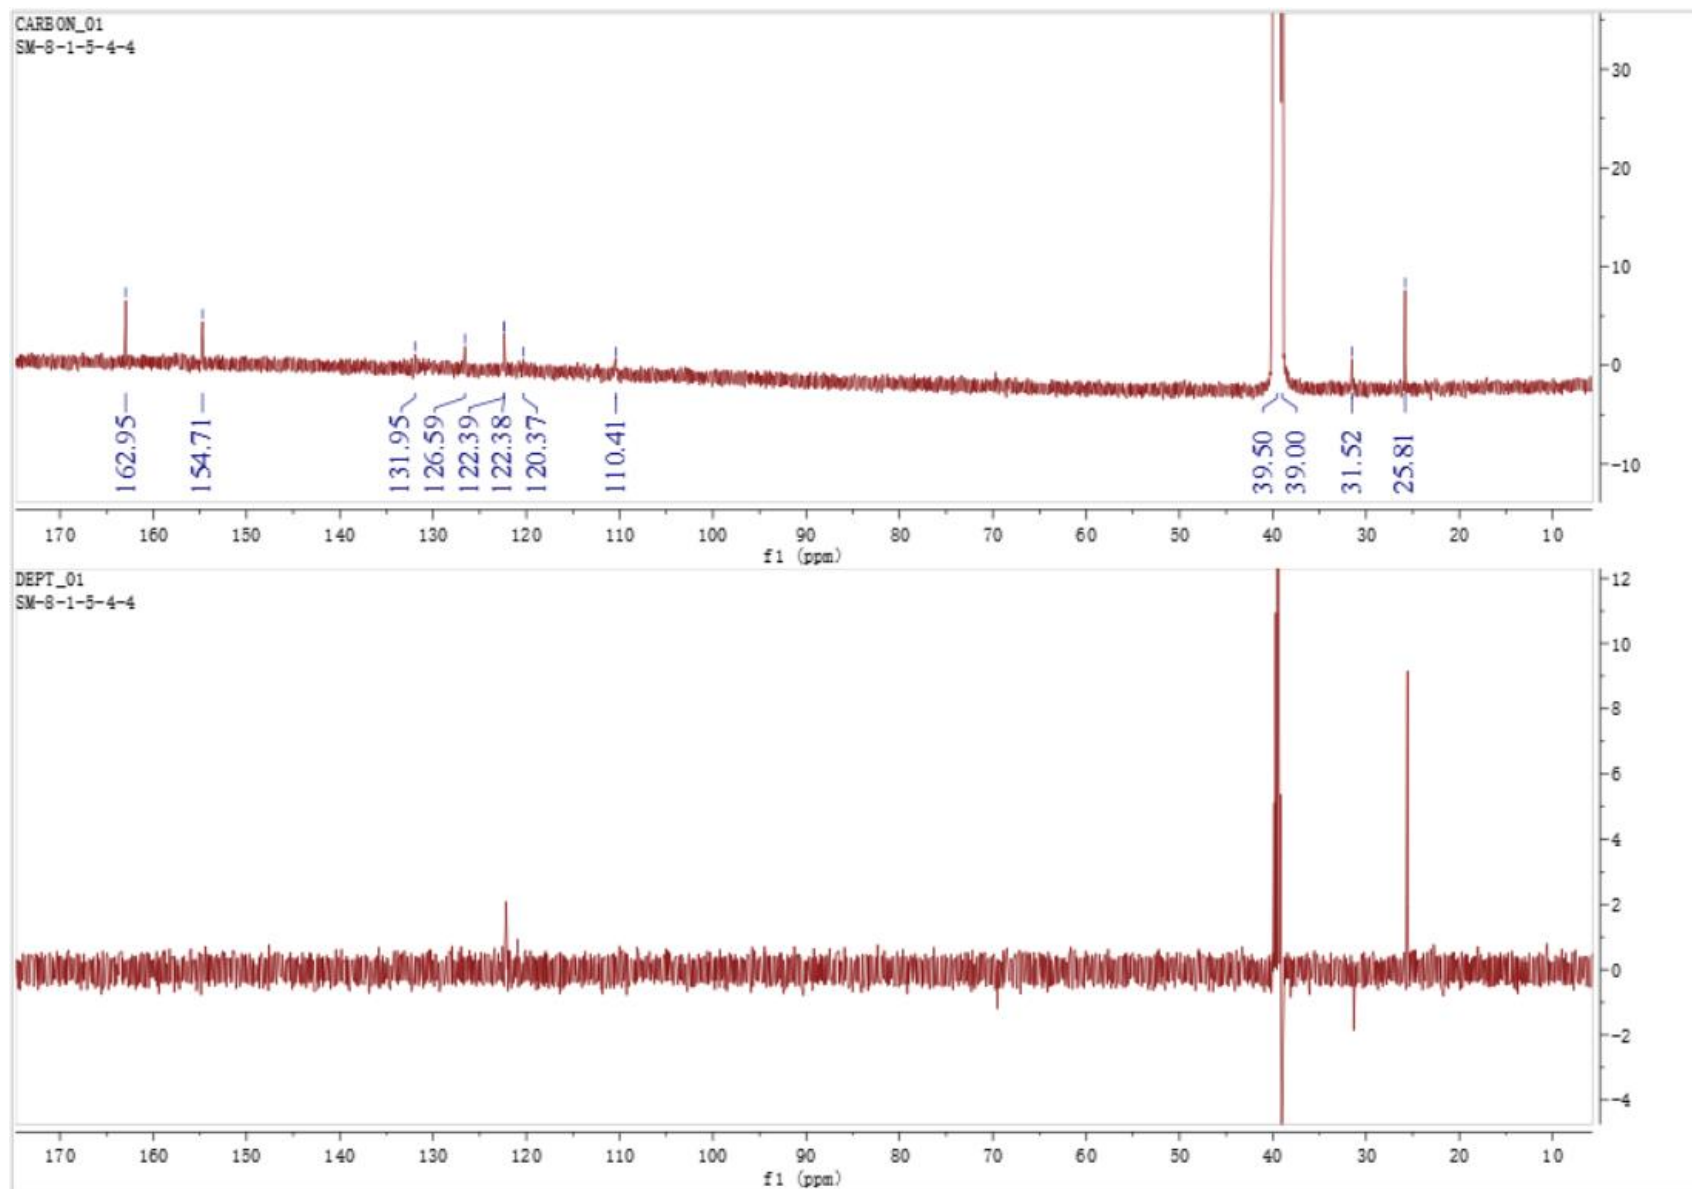

**Figure S56.** <sup>13</sup>C NMR and DEPT spectrum of compound **5** in DMSO-*d*<sub>6</sub> (125 MHz).

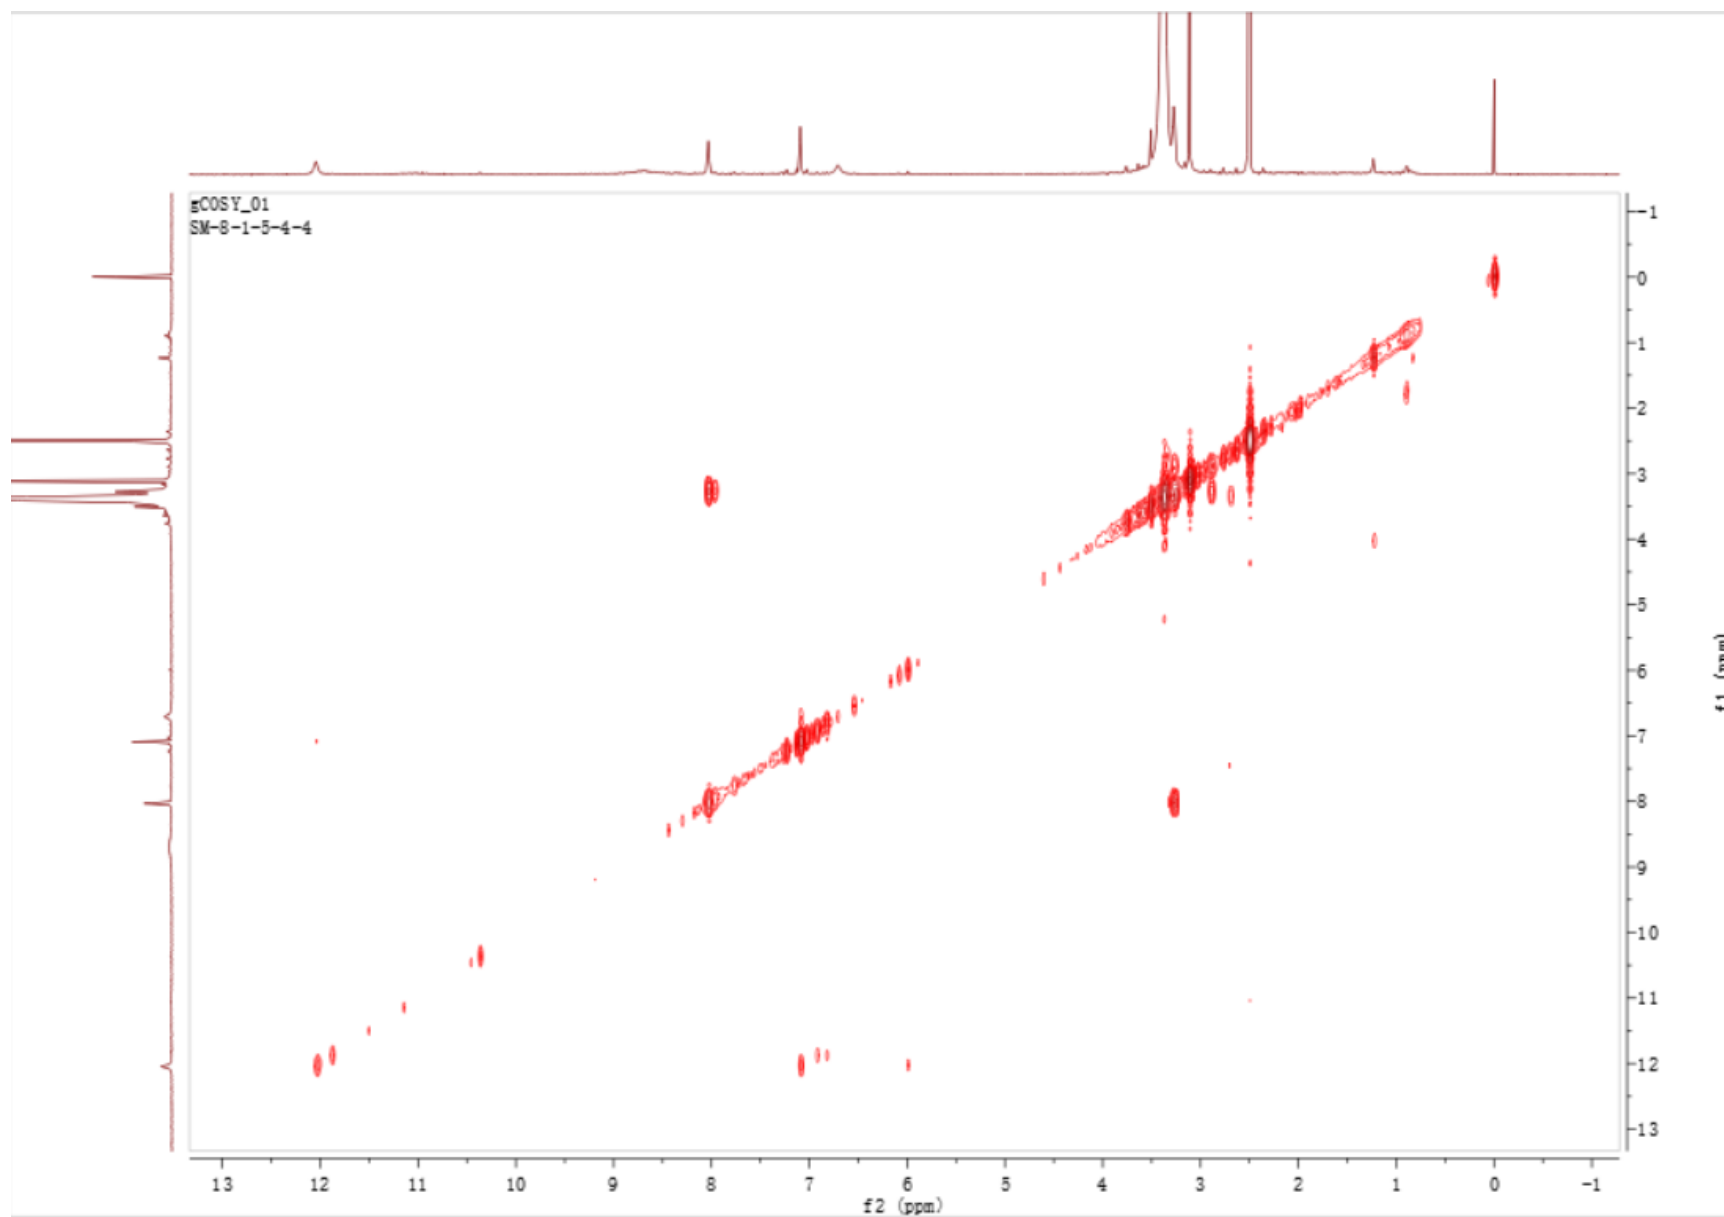

**Figure S57.**  $^1\text{H}$ - $^1\text{H}$  COSY spectrum of compound **5** in  $\text{DMSO-}d_6$  (500 MHz).

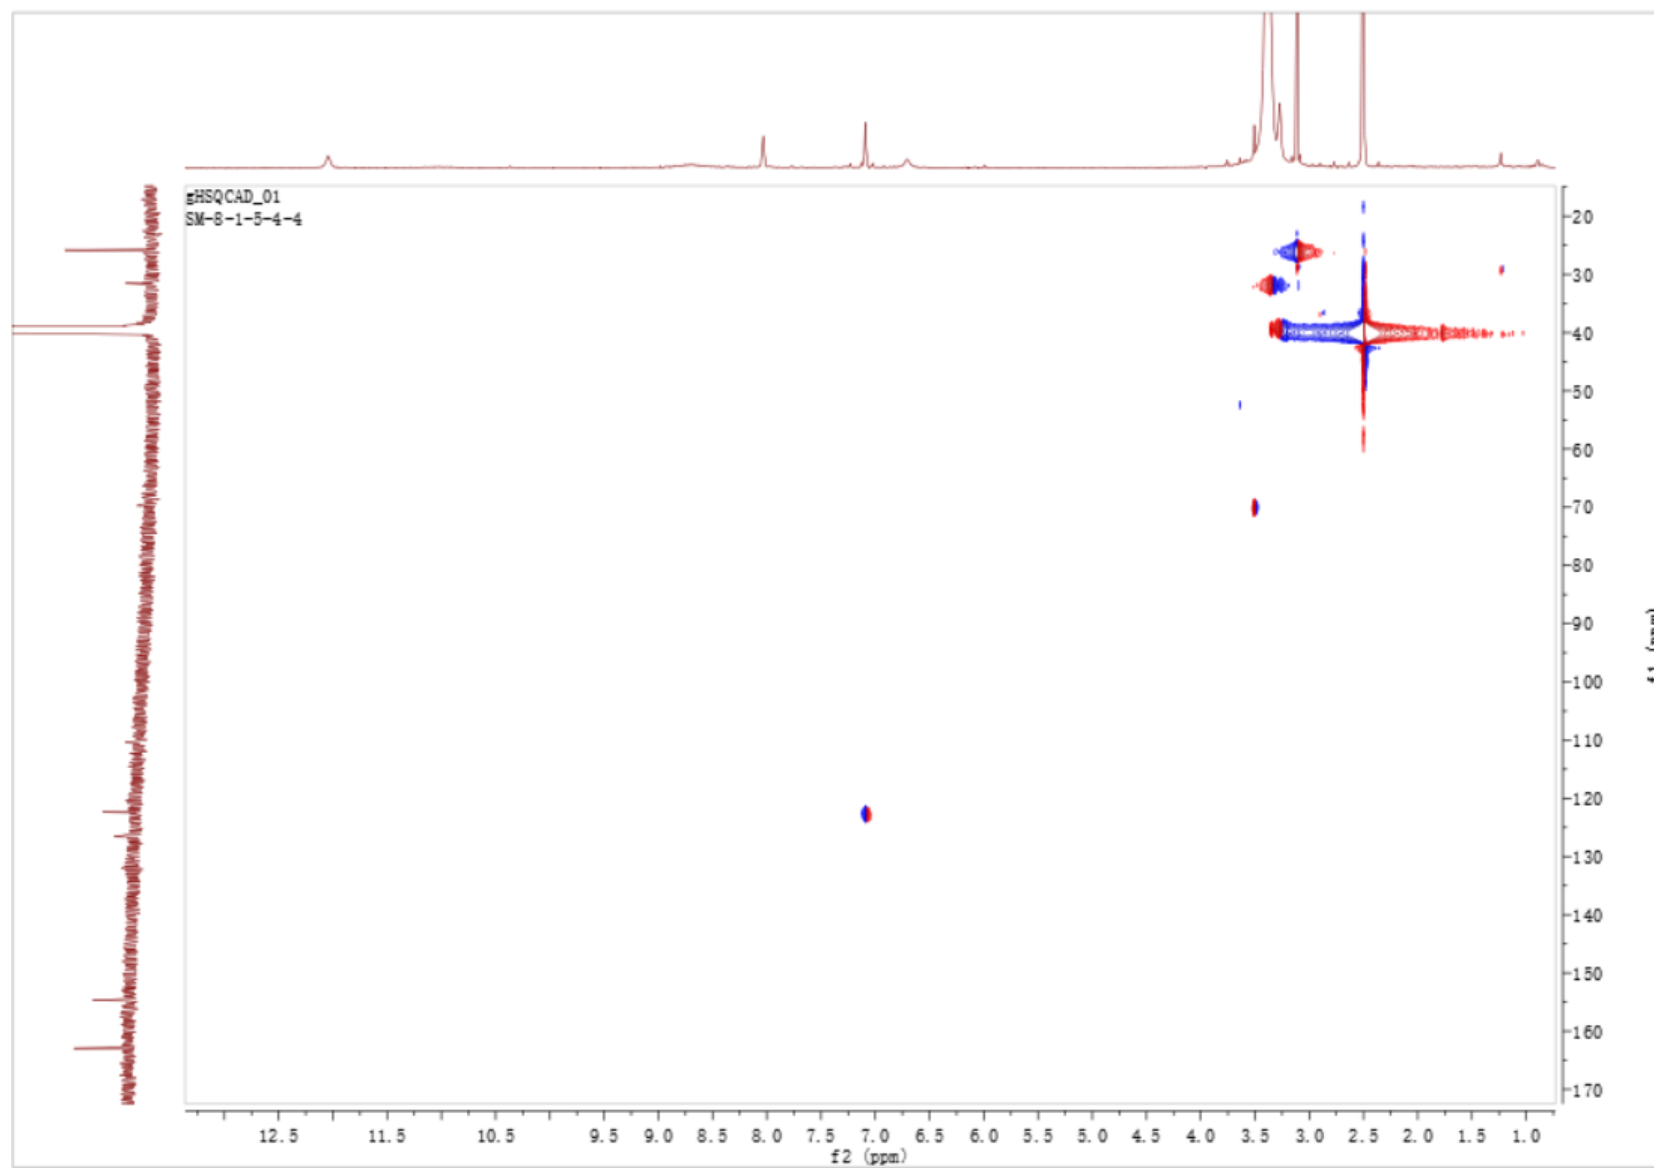

**Figure S58.** HSQC spectrum of compound **5** in DMSO- $d_6$  (500 MHz)



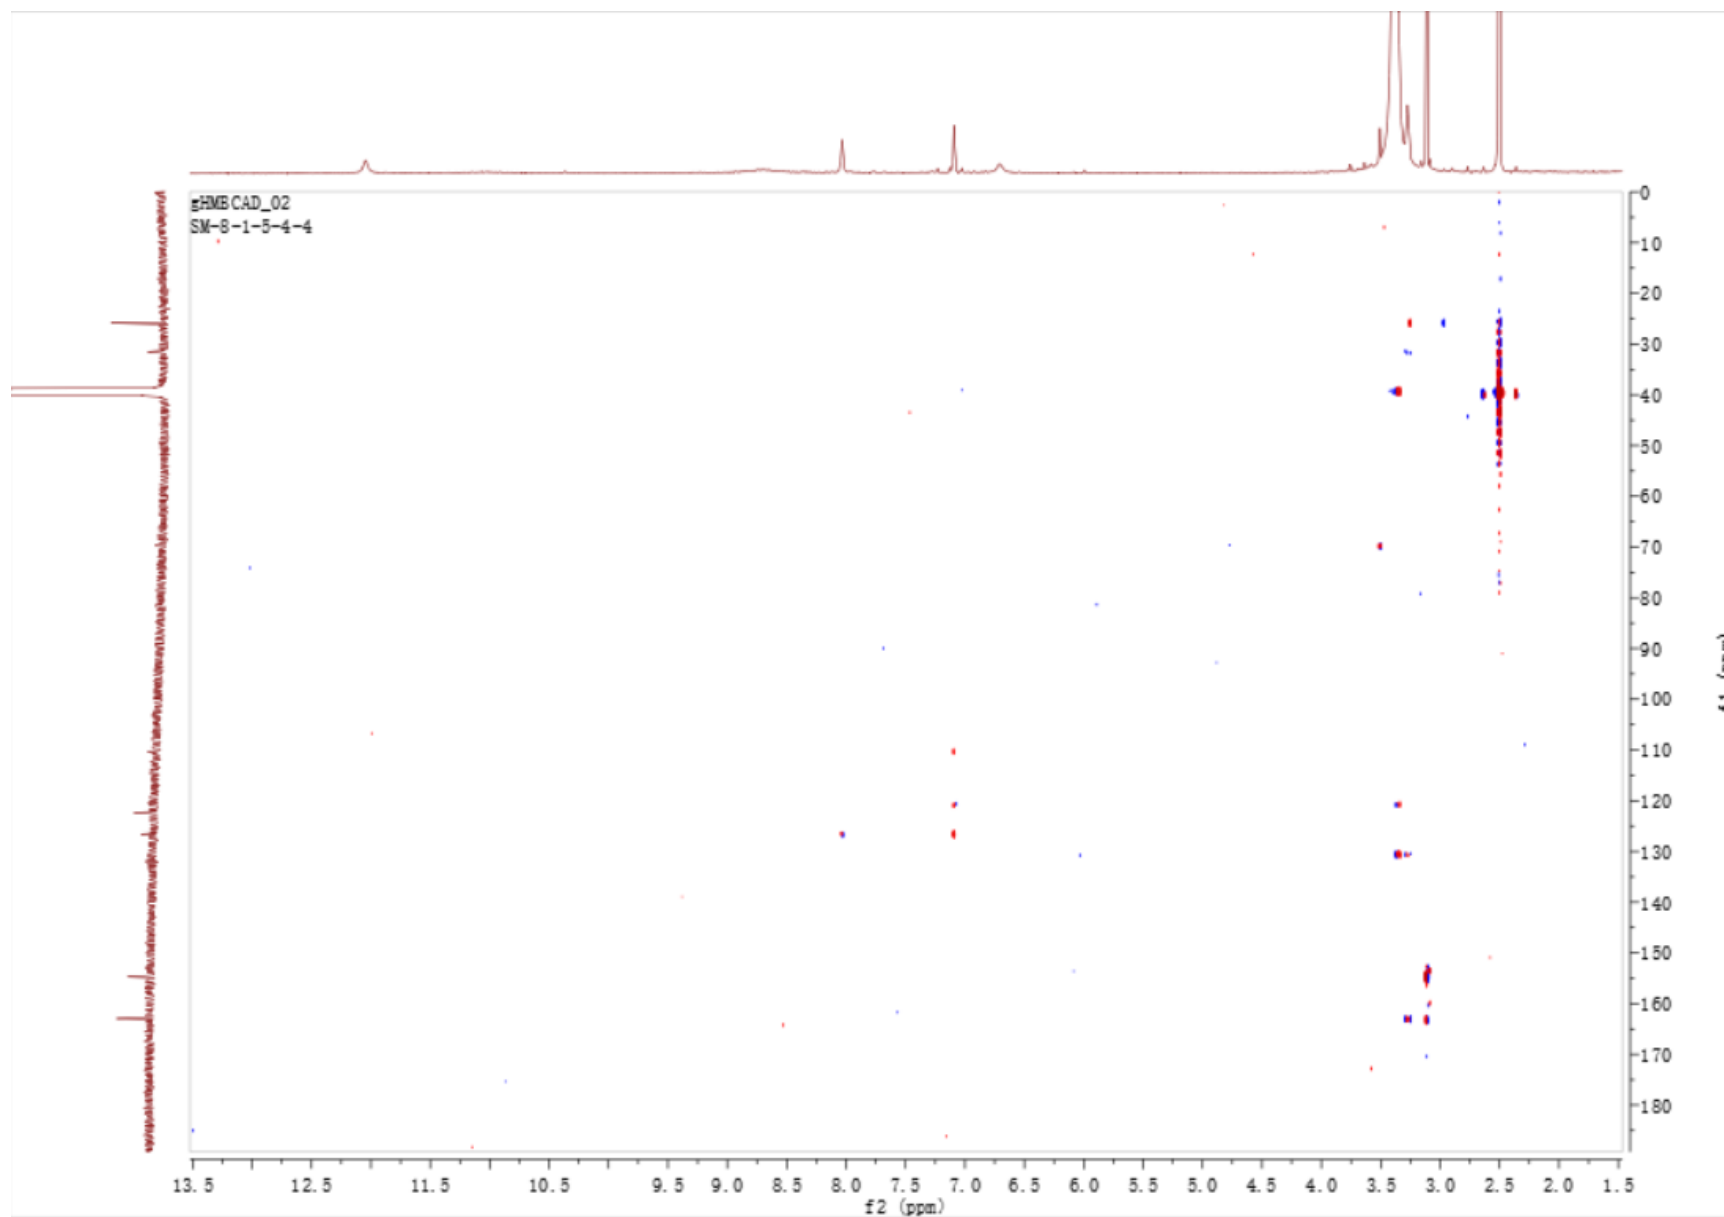

**Figure S59.** HMBC spectrum of compound **5** in DMSO-*d*<sub>6</sub> (500 MHz)

20210702-sm-8-1-5-4-4\_210702084852 #18-19 RT: 0.14-0.15 AV: 2 NL: 2.37E7  
T: FTMS + c ESI Full ms [150.00-2000.00]

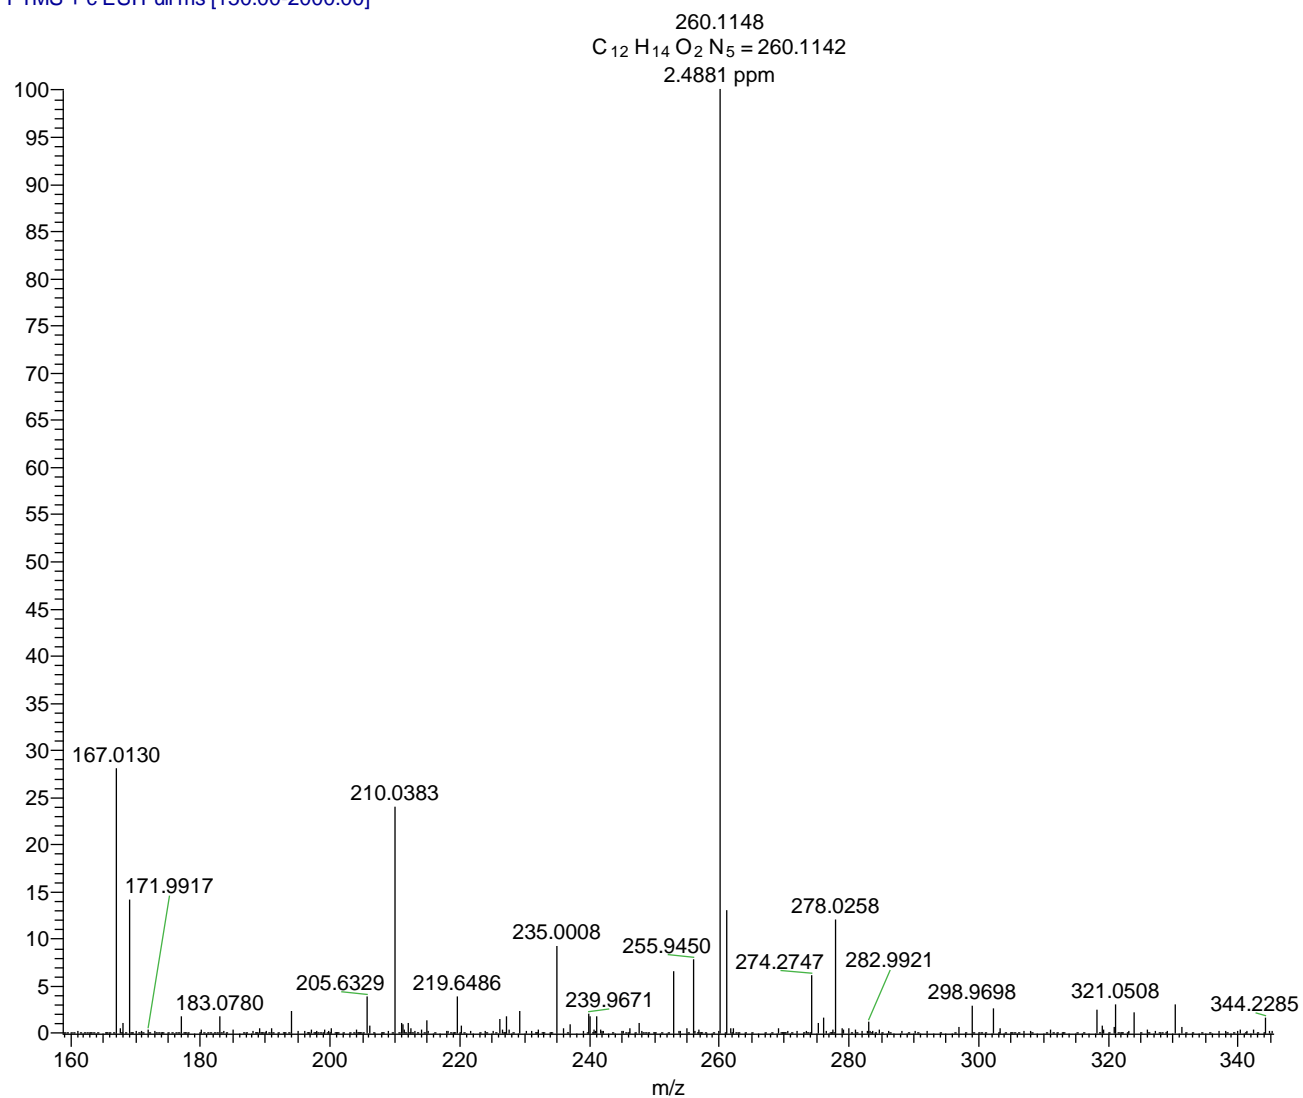

**Figure S60.** HRESIMS data of compound **5**.

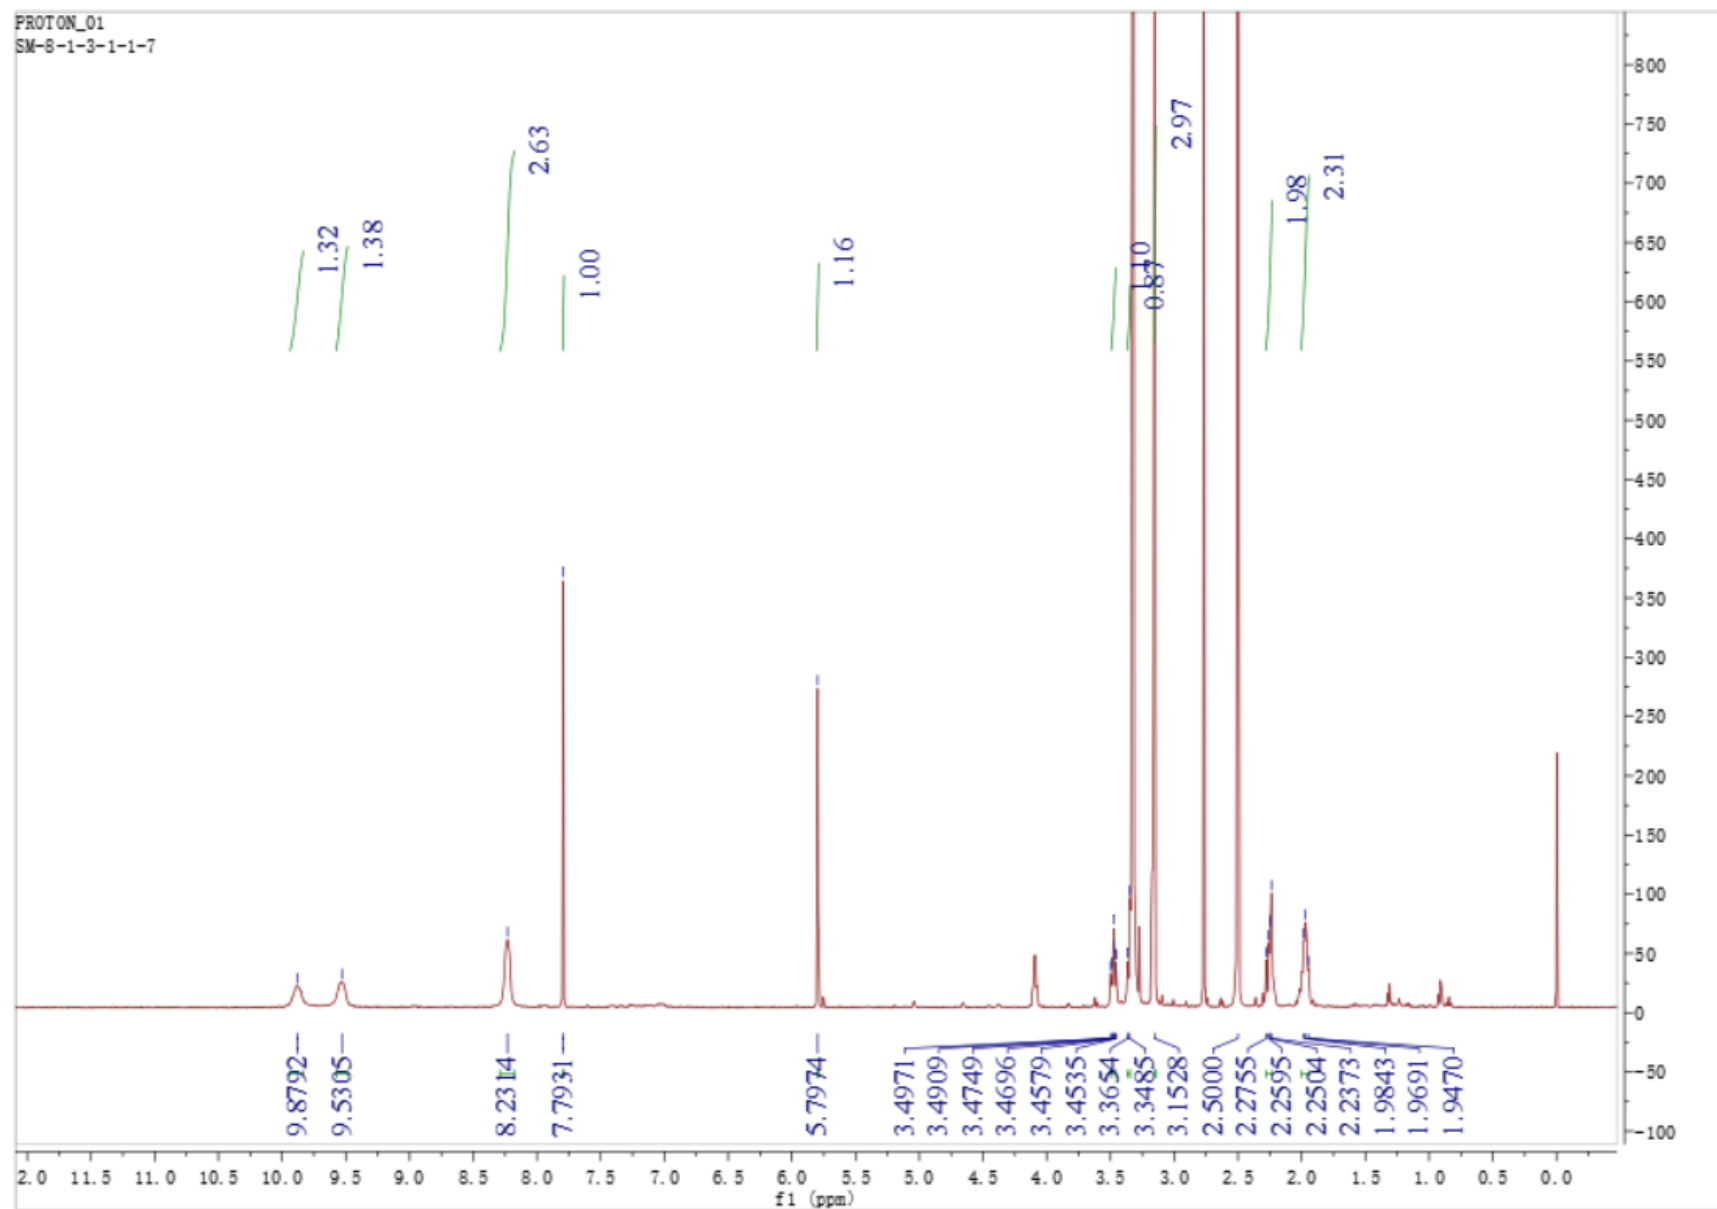

**Figure S61.**  $^1\text{H}$  NMR spectrum of compound **6** in  $\text{DMSO}-d_6$  (500 MHz).

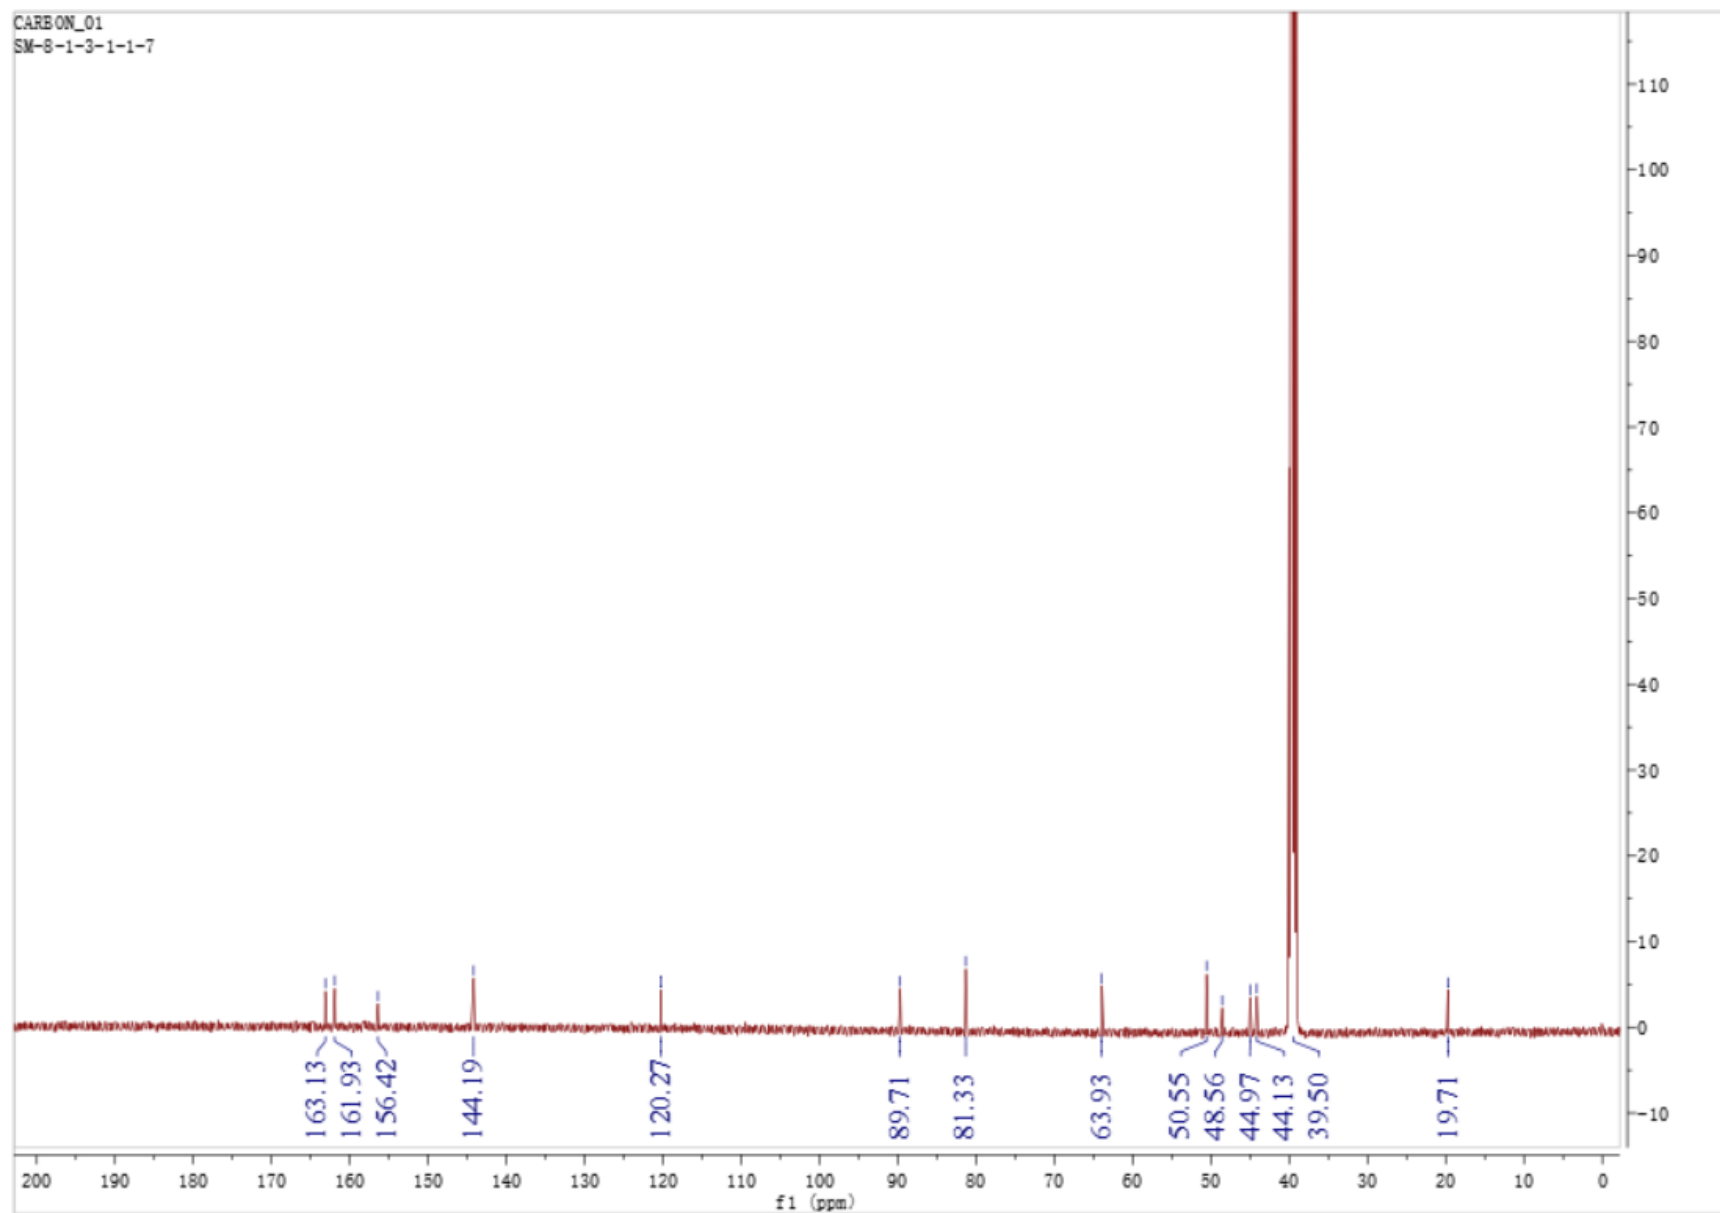

**Figure S62.**  $^{13}\text{C}$  NMR spectrum of compound **6** in  $\text{DMSO-}d_6$  (125 MHz).

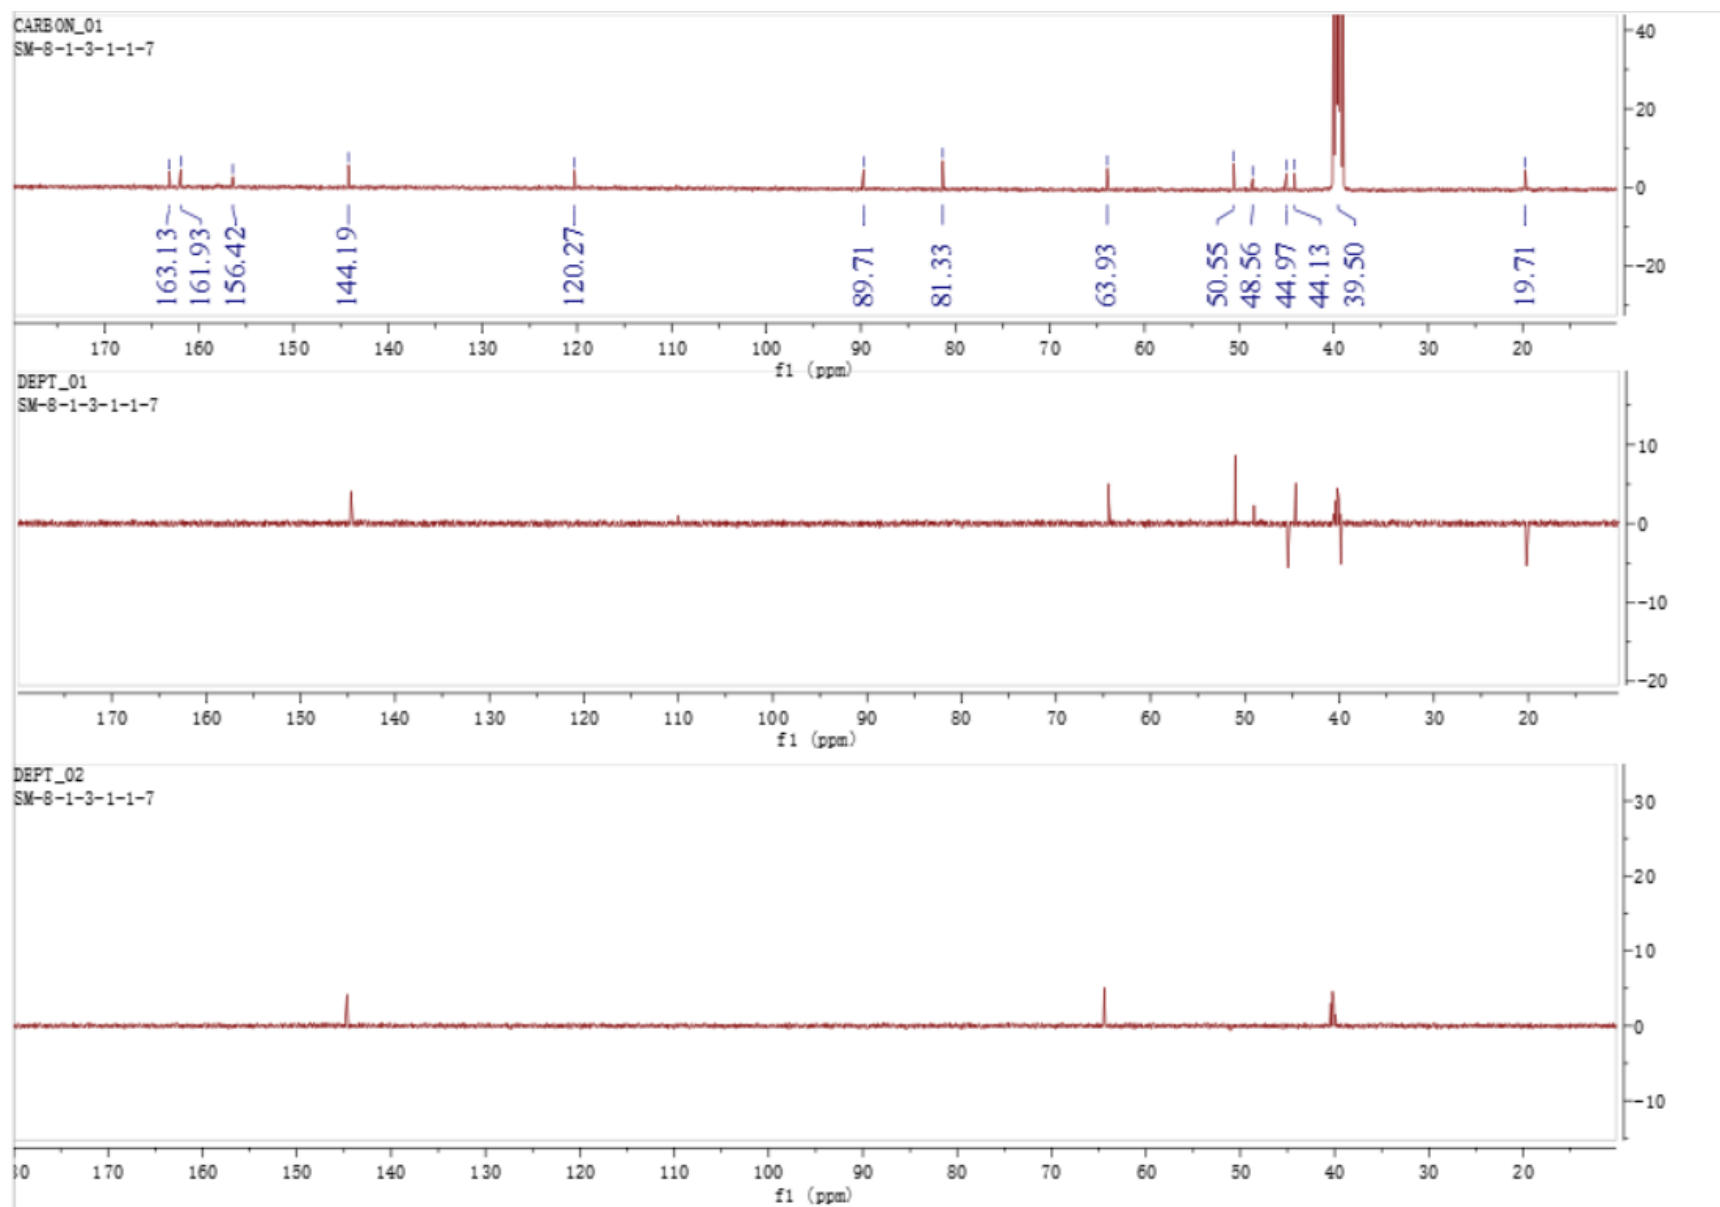

**Figure S63.**  $^{13}\text{C}$  NMR and DEPT spectrum of compound **6** in  $\text{DMSO}-d_6$  (125 MHz).

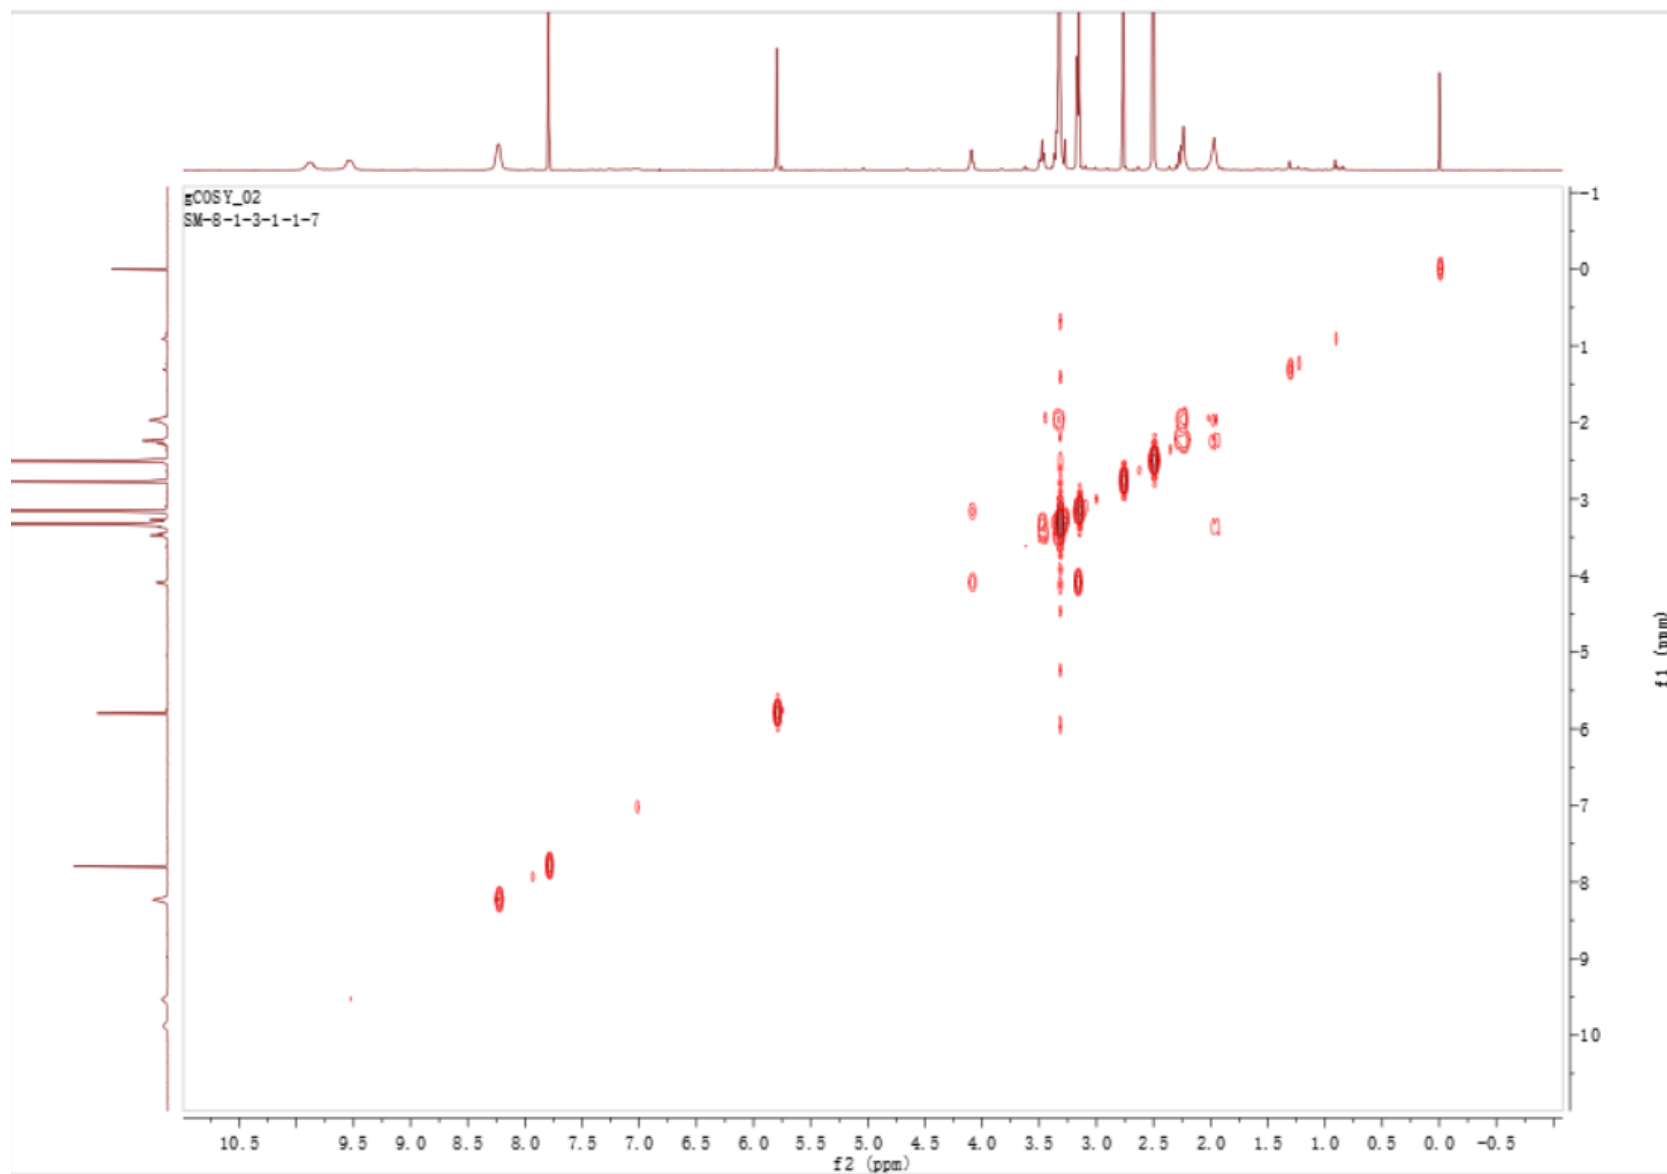

**Figure S64.**  $^1\text{H}$ - $^1\text{H}$  COSY spectrum of compound **6** in  $\text{DMSO}-d_6$  (500 MHz).

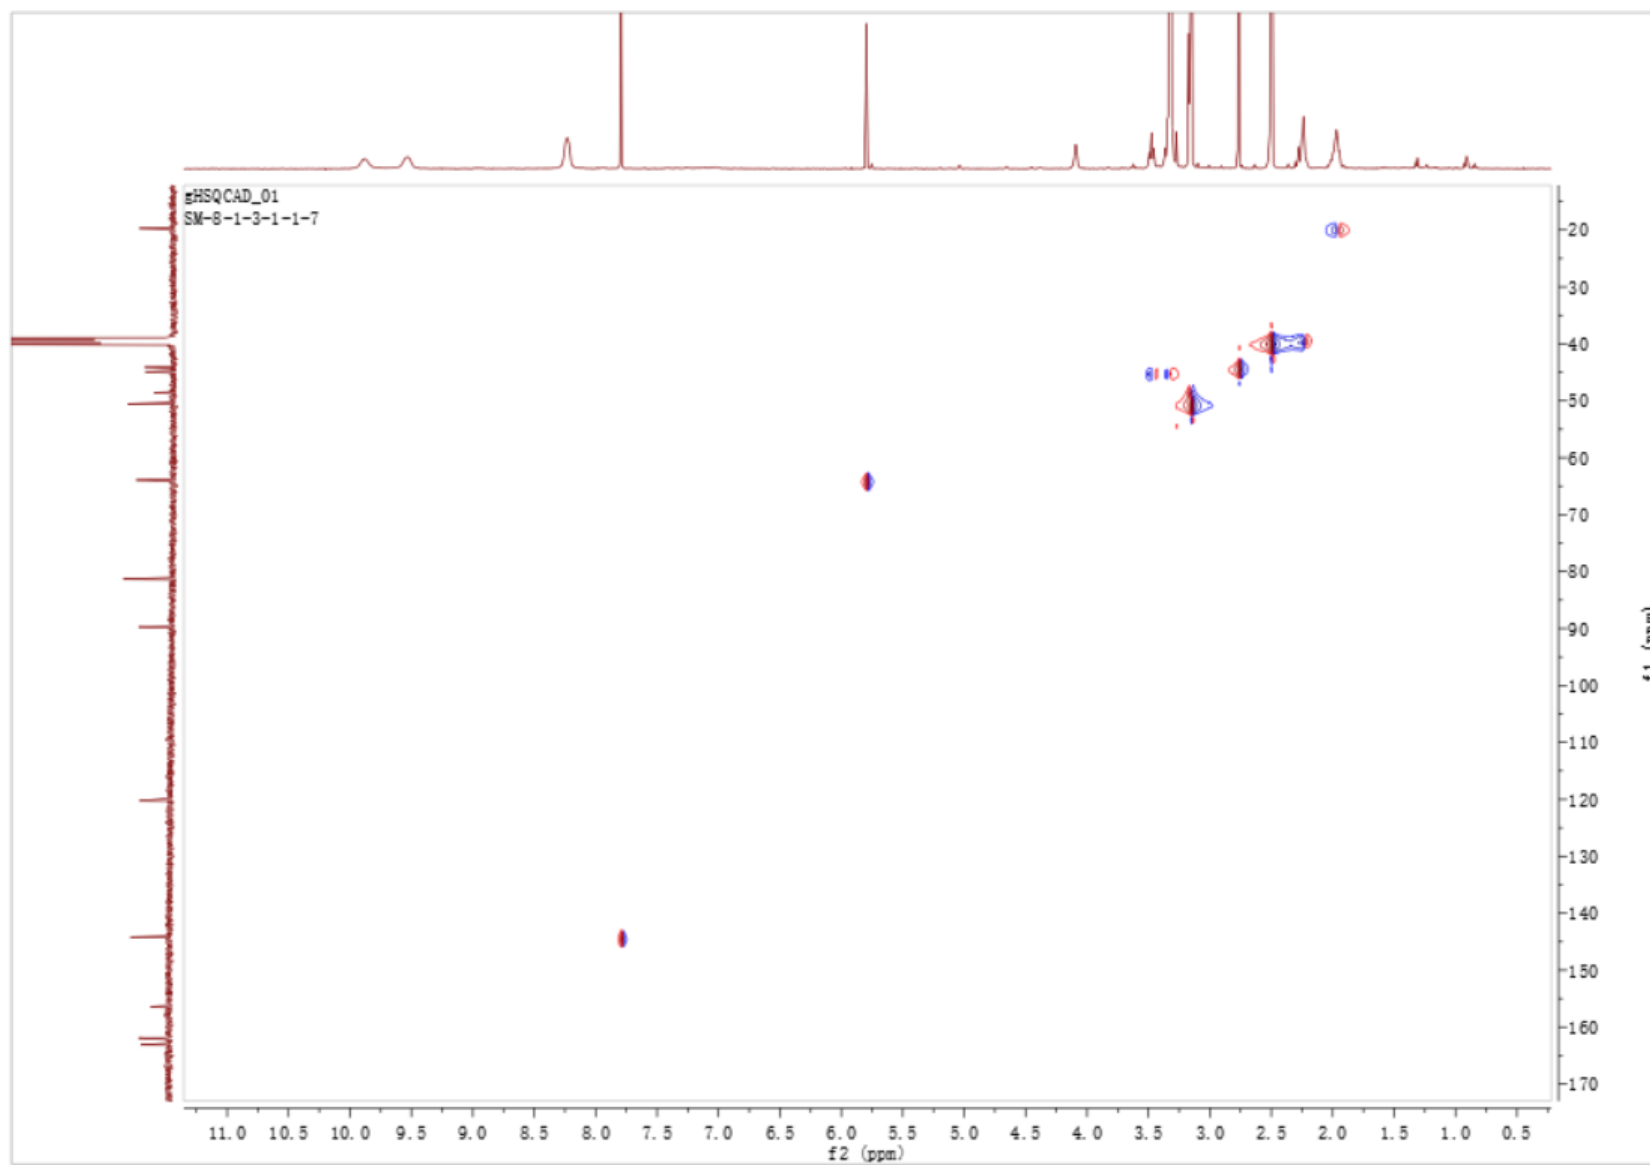

**Figure S65.** HSQC spectrum of compound **6** in DMSO-*d*<sub>6</sub> (500 MHz).

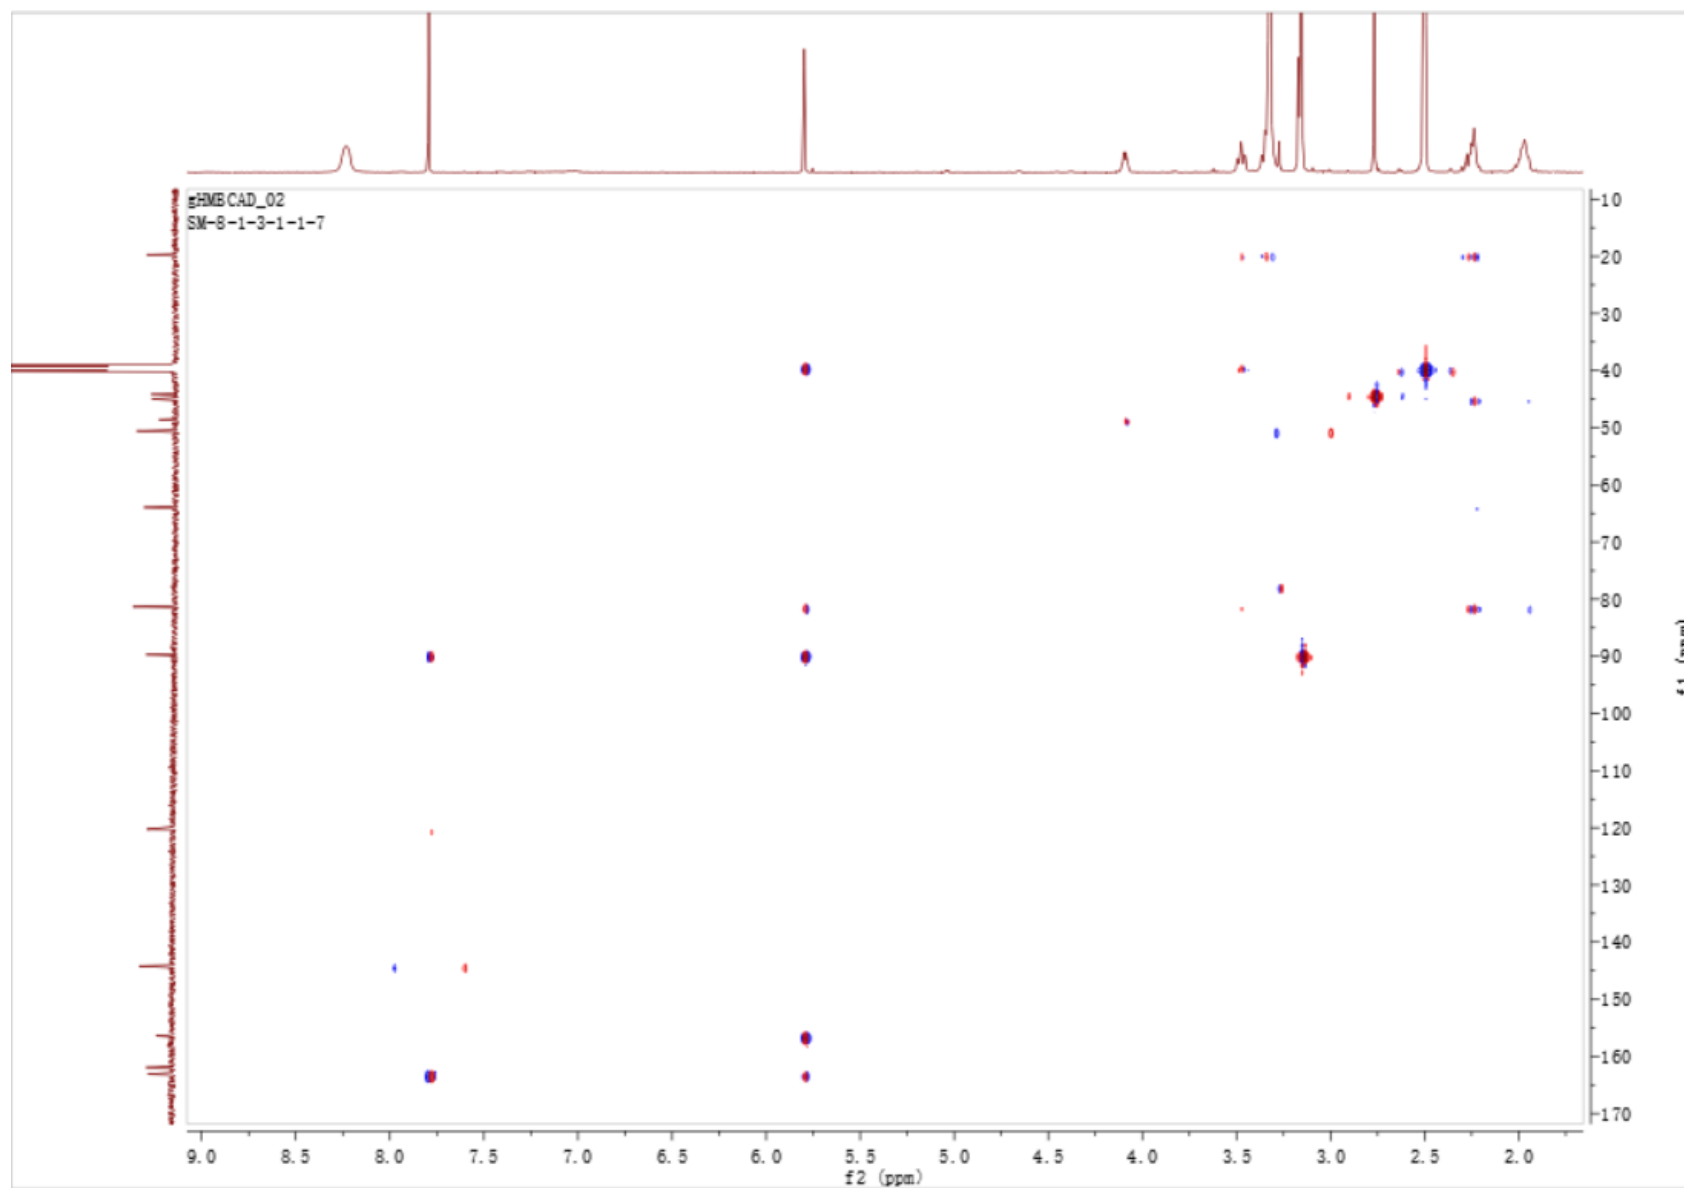

**Figure S66.** HMBC spectrum of compound **6** in DMSO-*d*<sub>6</sub> (500 MHz)



20210520-SM-813117\_210520105231 #29 RT: 0.27 AV: 1 NL: 9.34E7  
T: FTMS + p ESI sid=35.00 Full ms [120.00-1000.00]

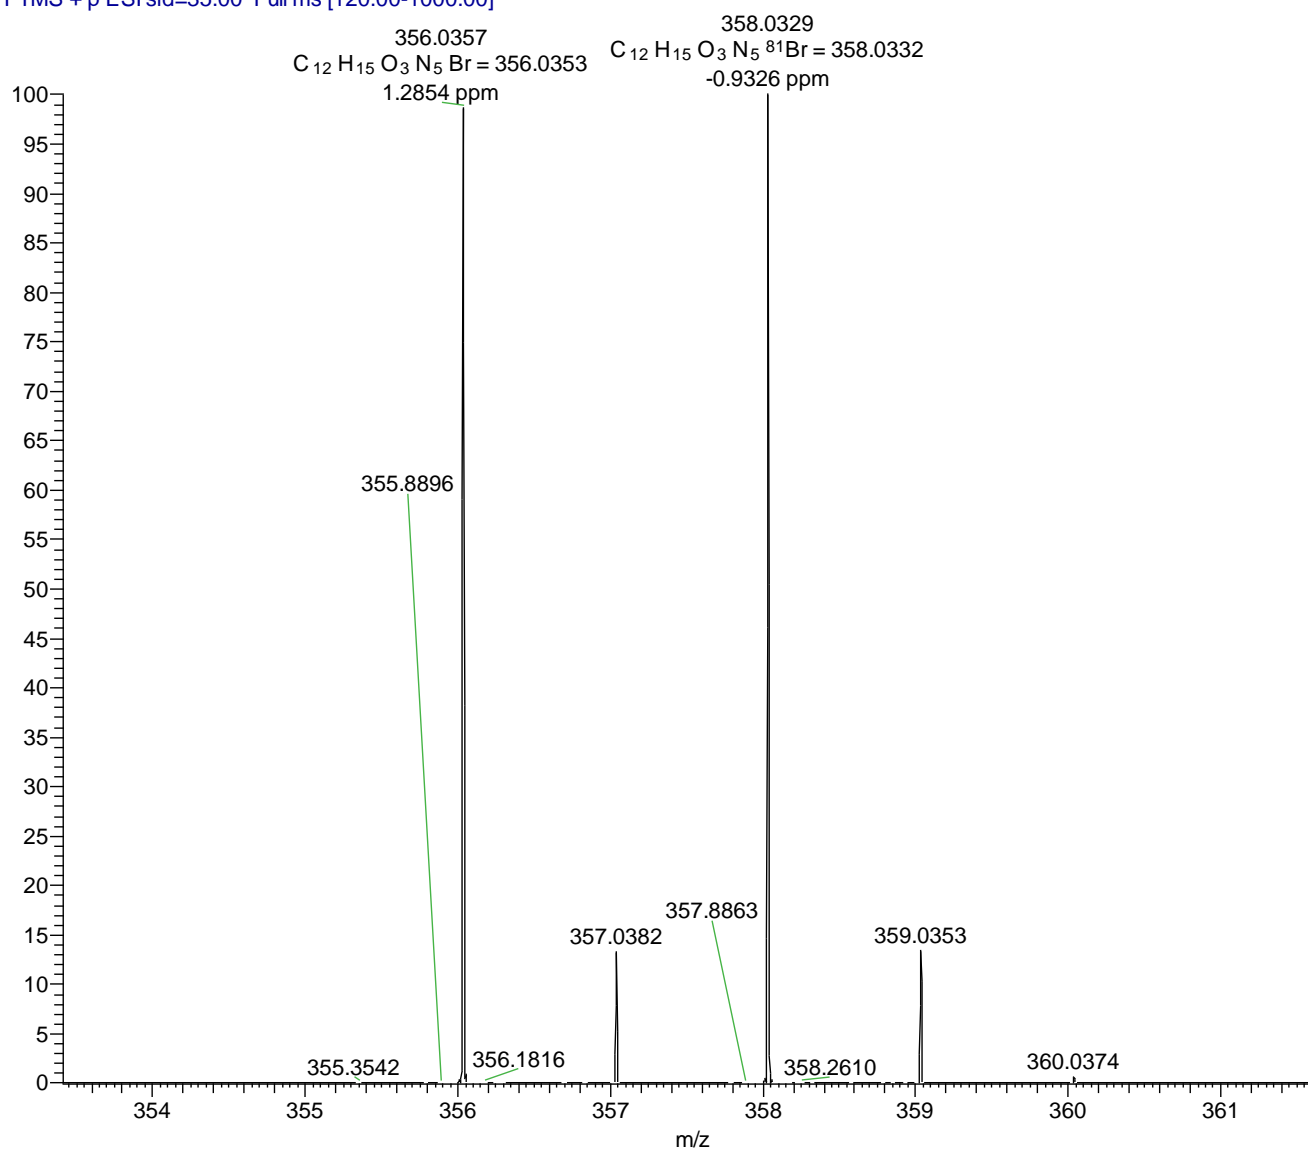

Figure S67. HRESIMS data of compound 6.

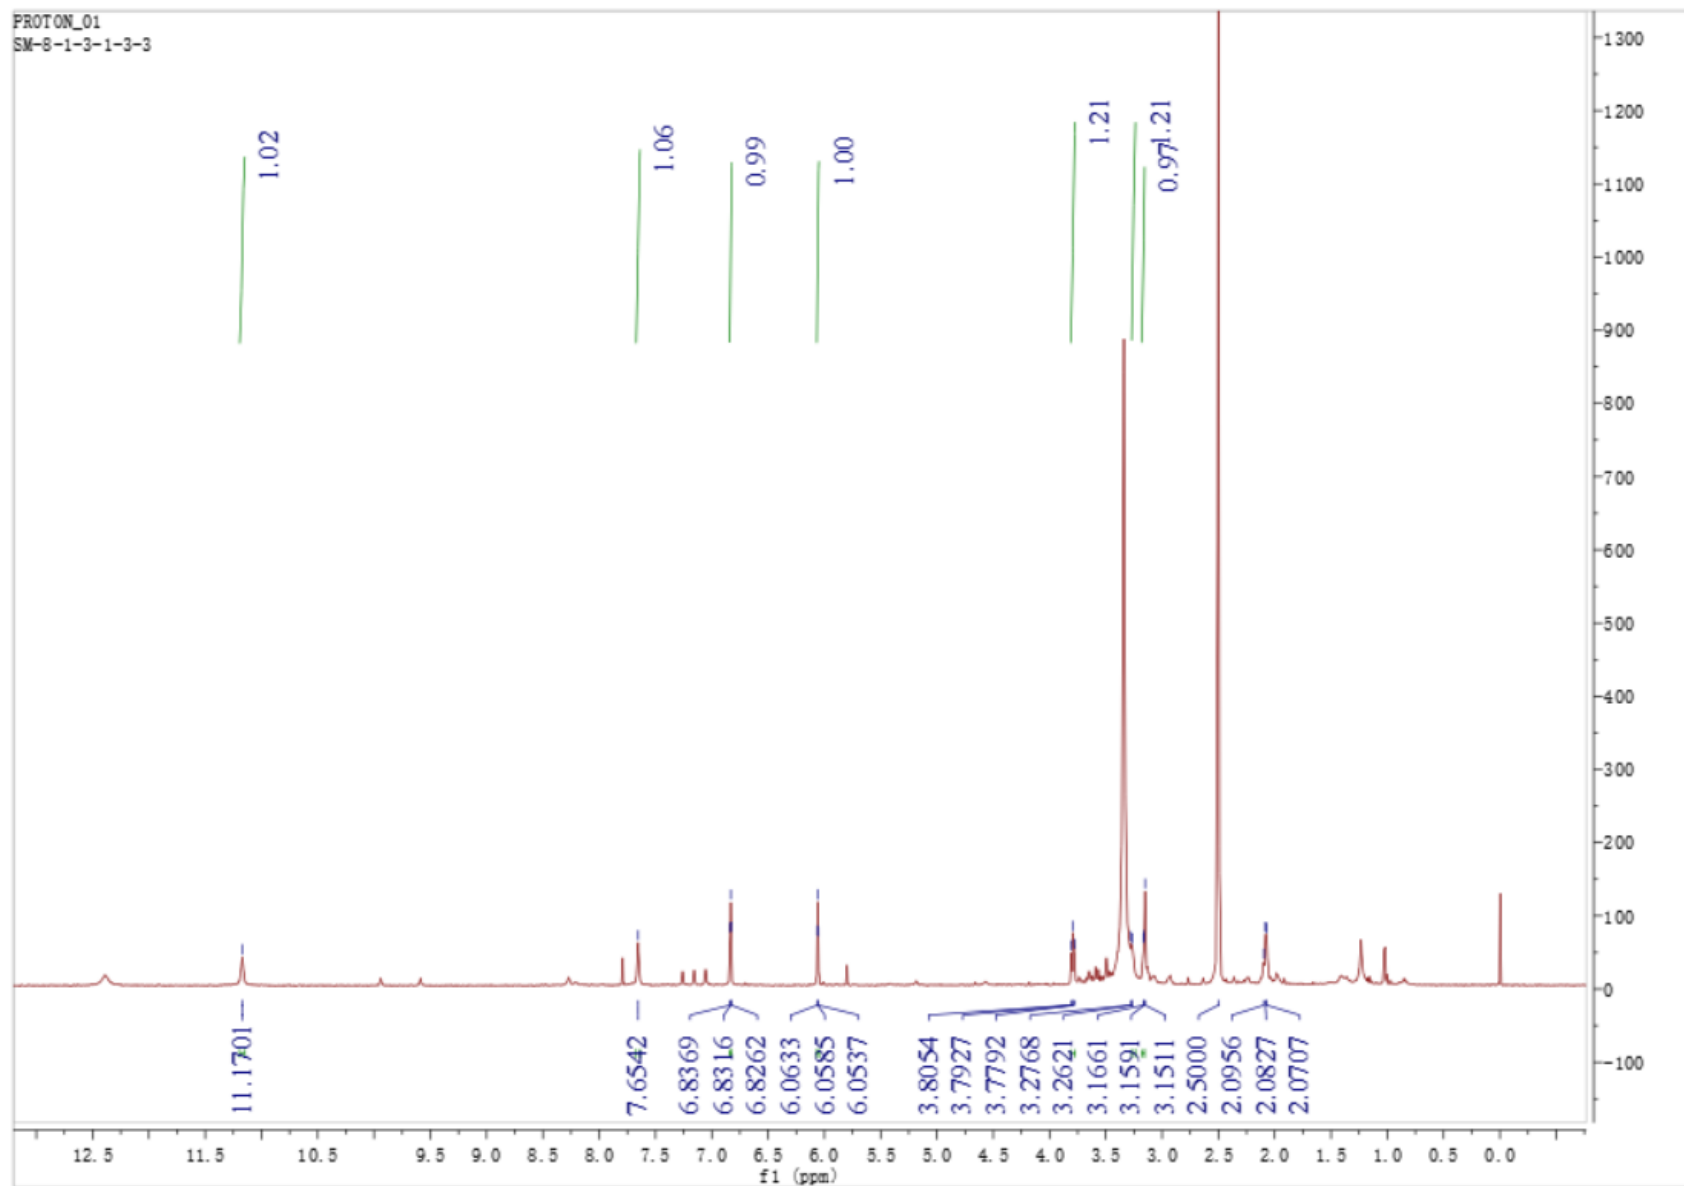

**Figure S68.**  $^1\text{H}$  NMR spectrum of compound **7** in  $\text{DMSO}-d_6$  (500 MHz).

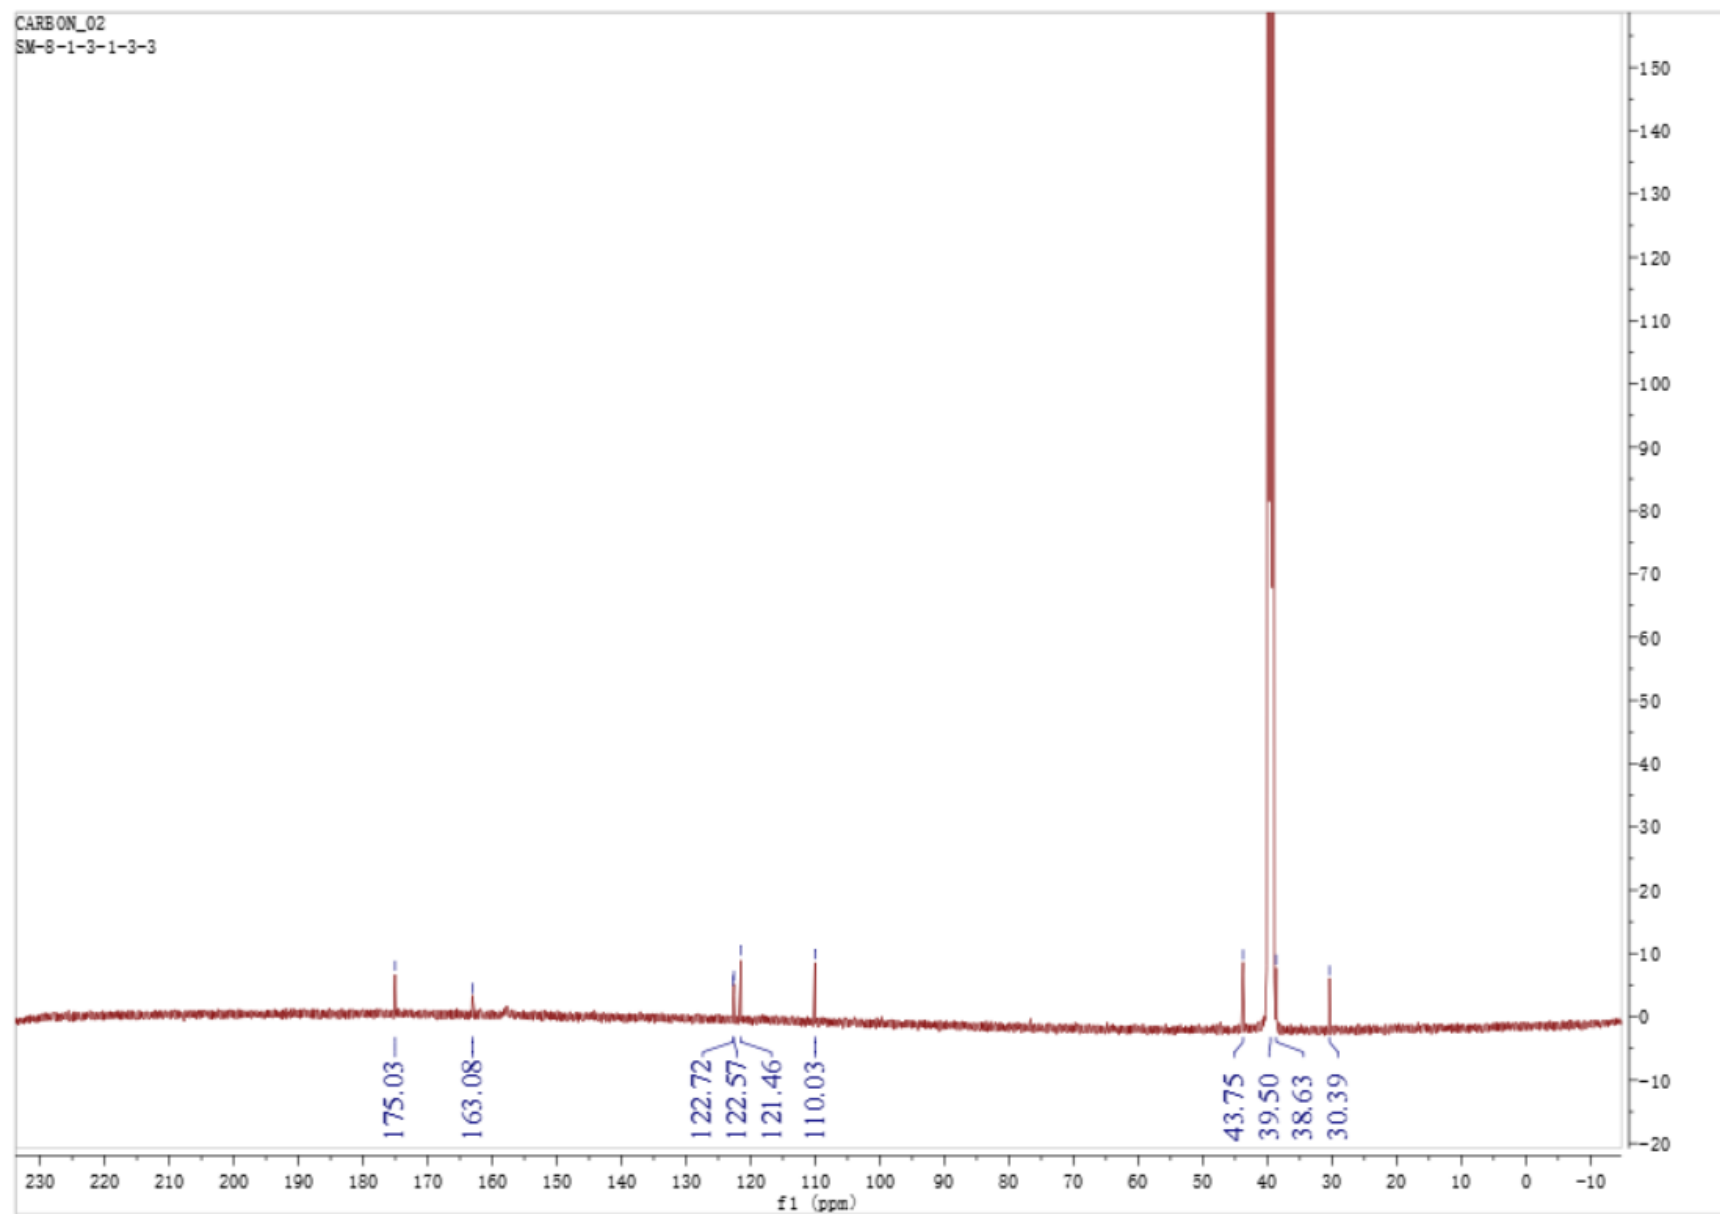

**Figure S69.**  $^{13}\text{C}$  NMR spectrum of compound **7** in  $\text{DMSO}-d_6$  (125 MHz).

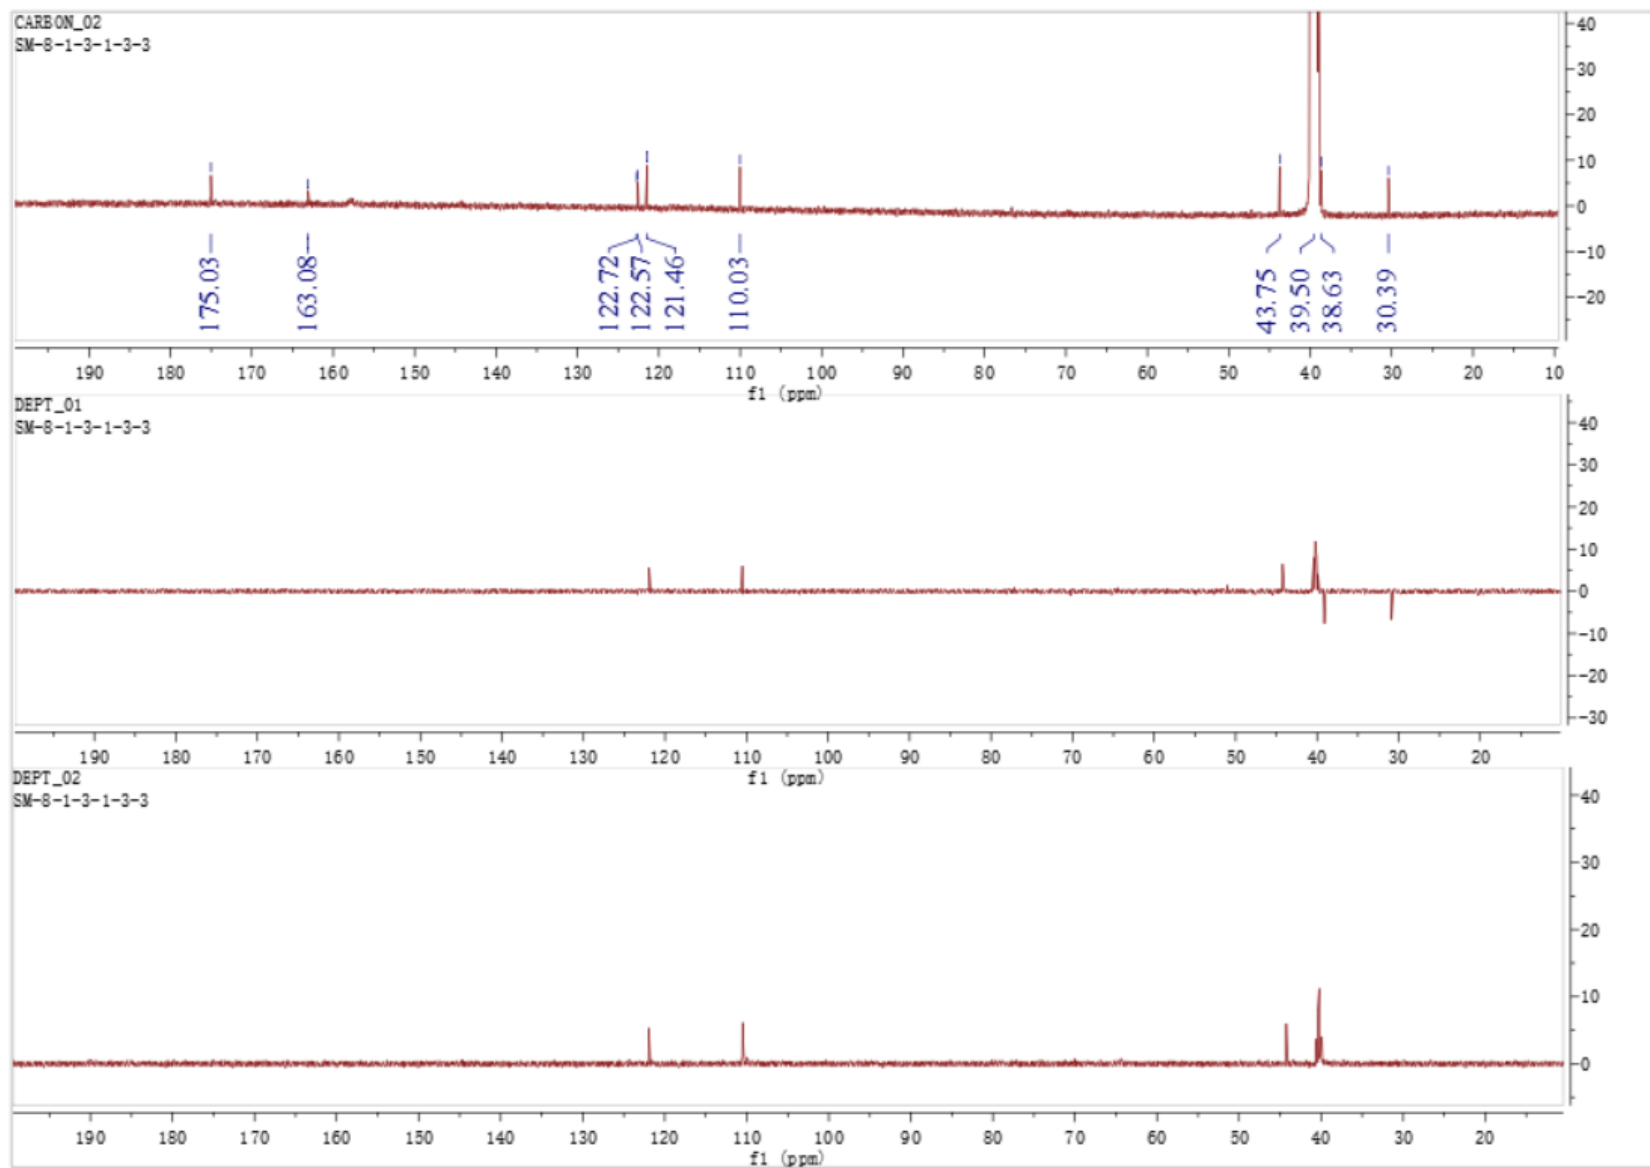

**Figure S70.**  $^{13}\text{C}$  NMR and DEPT spectrum of compound **7** in  $\text{DMSO}-d_6$  (125 MHz).

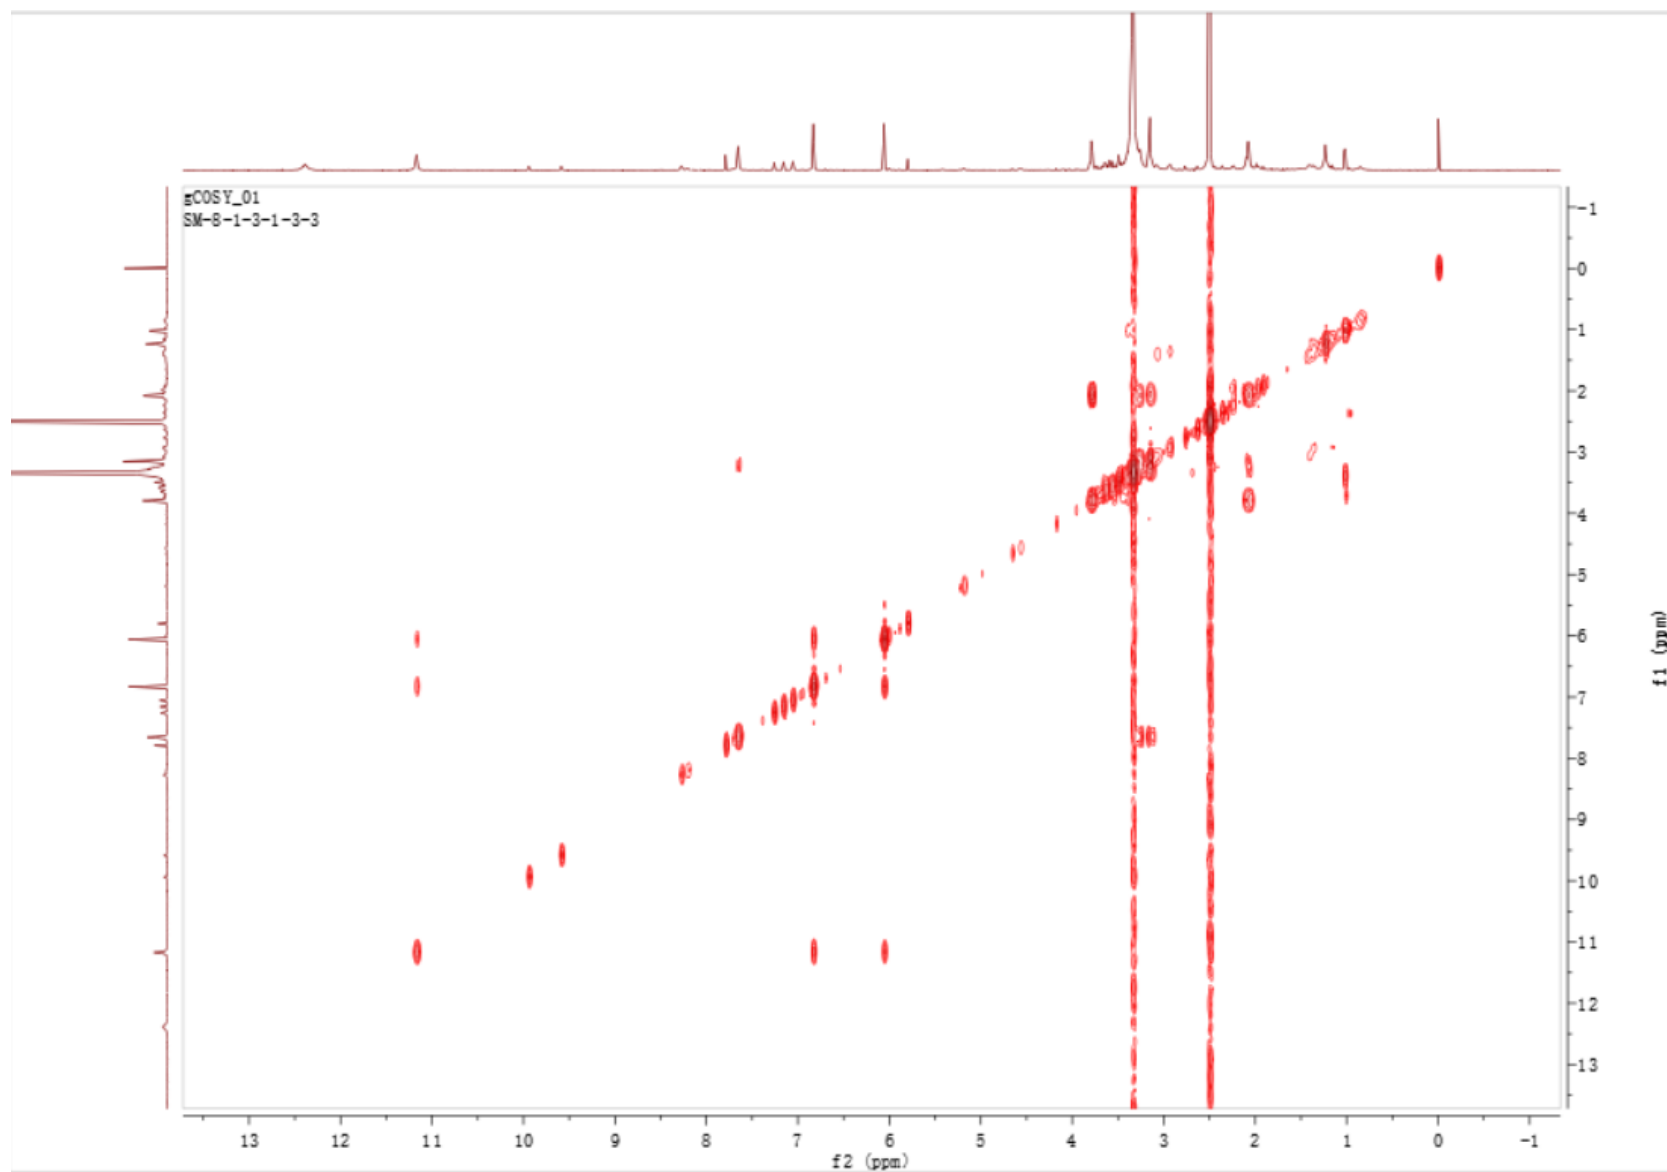

**Figure S71.**  $^1\text{H}$ - $^1\text{H}$  COSY spectrum of compound **7** in  $\text{DMSO}-d_6$  (500 MHz)

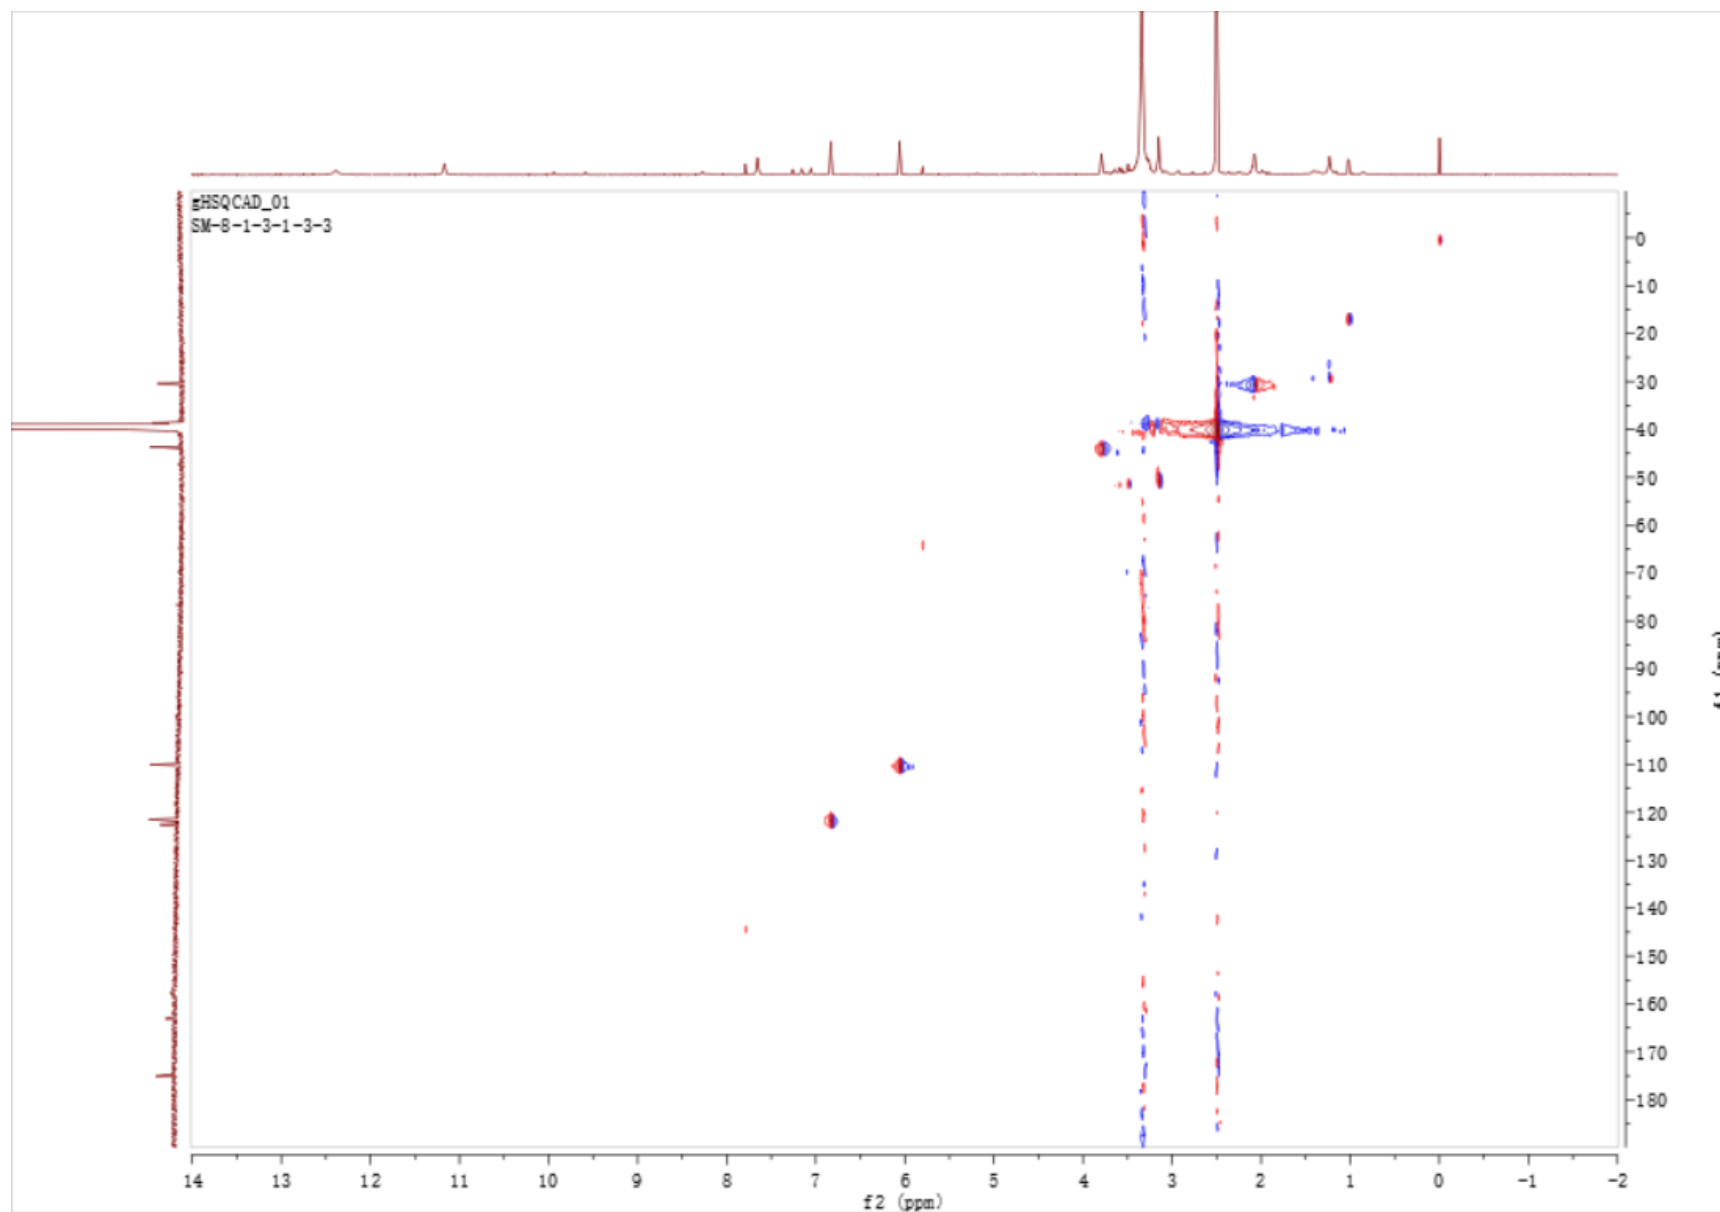

**Figure S72.** HSQC spectrum of compound **7** in DMSO-*d*<sub>6</sub> (500 MHz).

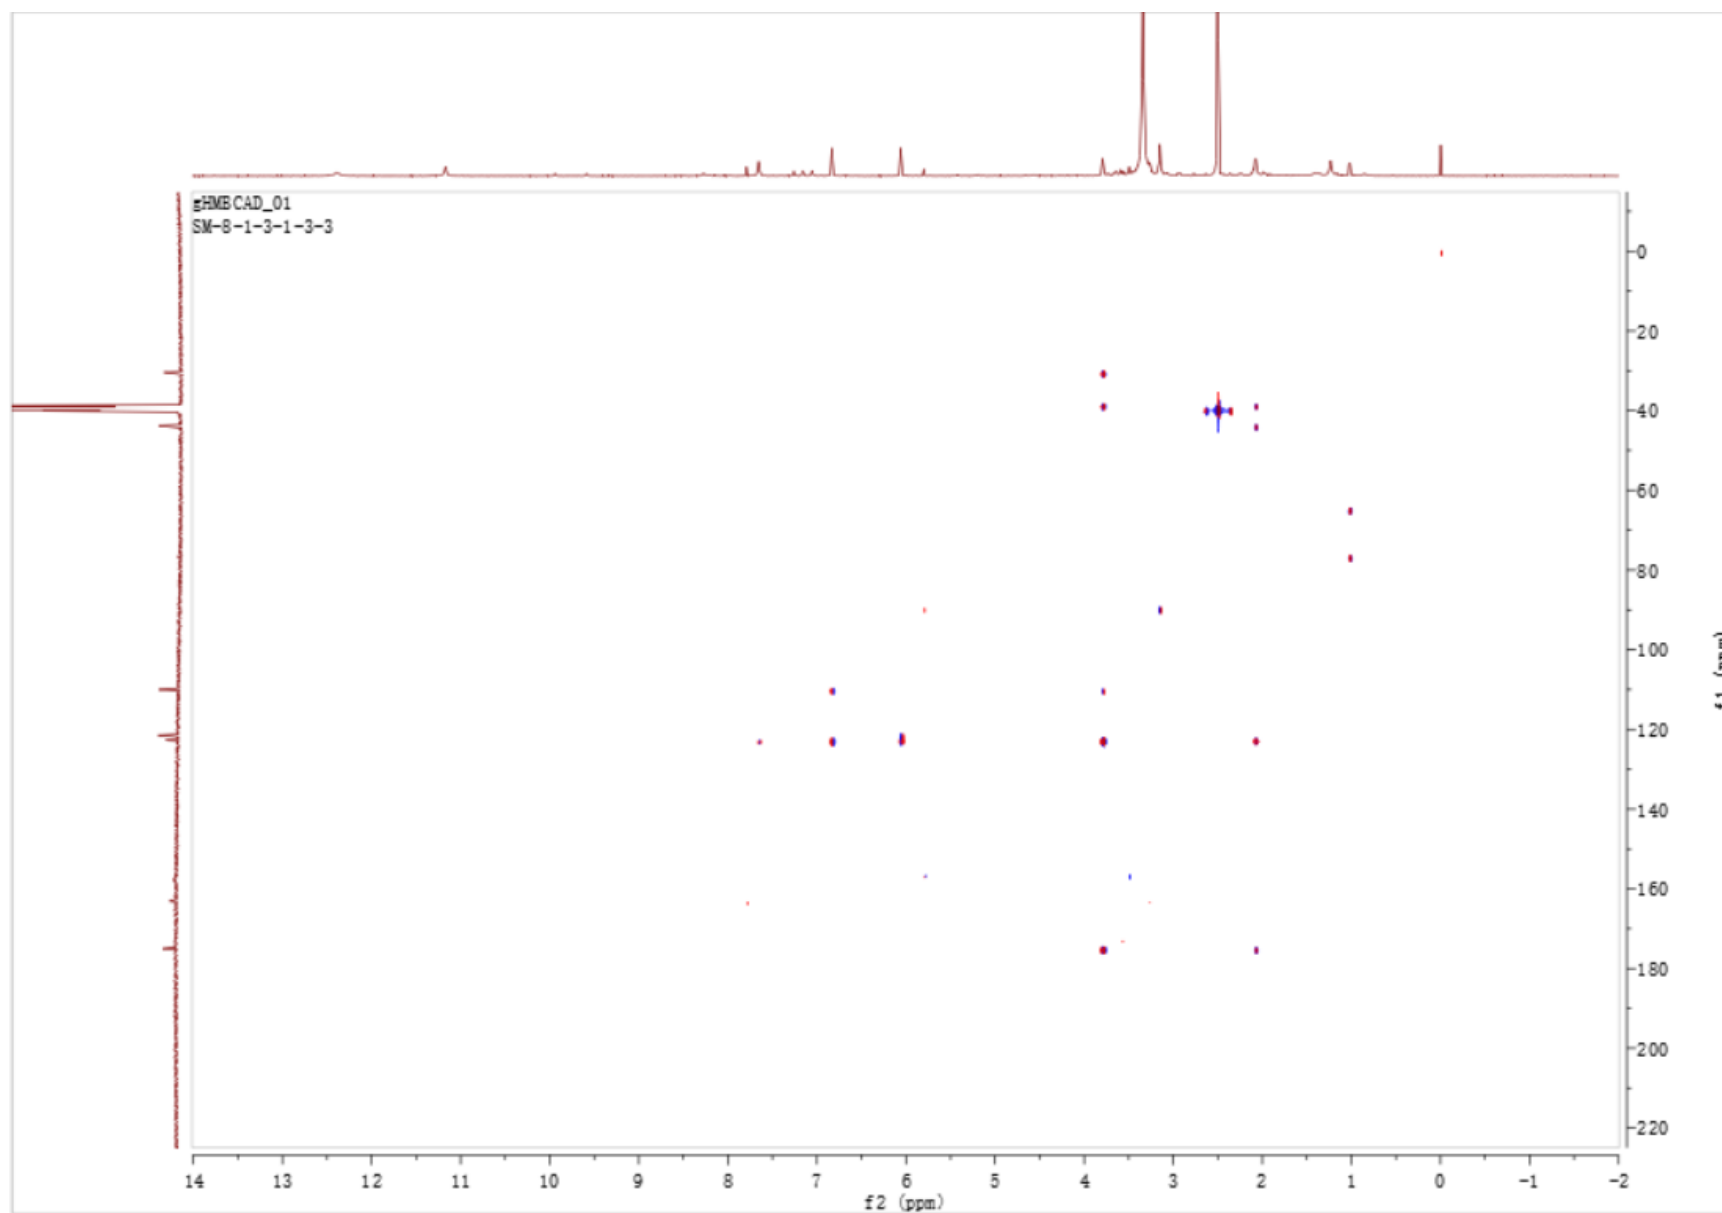

**Figure S73.** HMBC spectrum of compound **7** in DMSO- $d_6$  (500 MHz).

20210611-sm-8-1-3-1-3-3\_210611132610 #13 RT: 0.10 AV: 1 NL: 5.79E6  
T: FTMS + p ESI Full ms [170.00-2000.00]

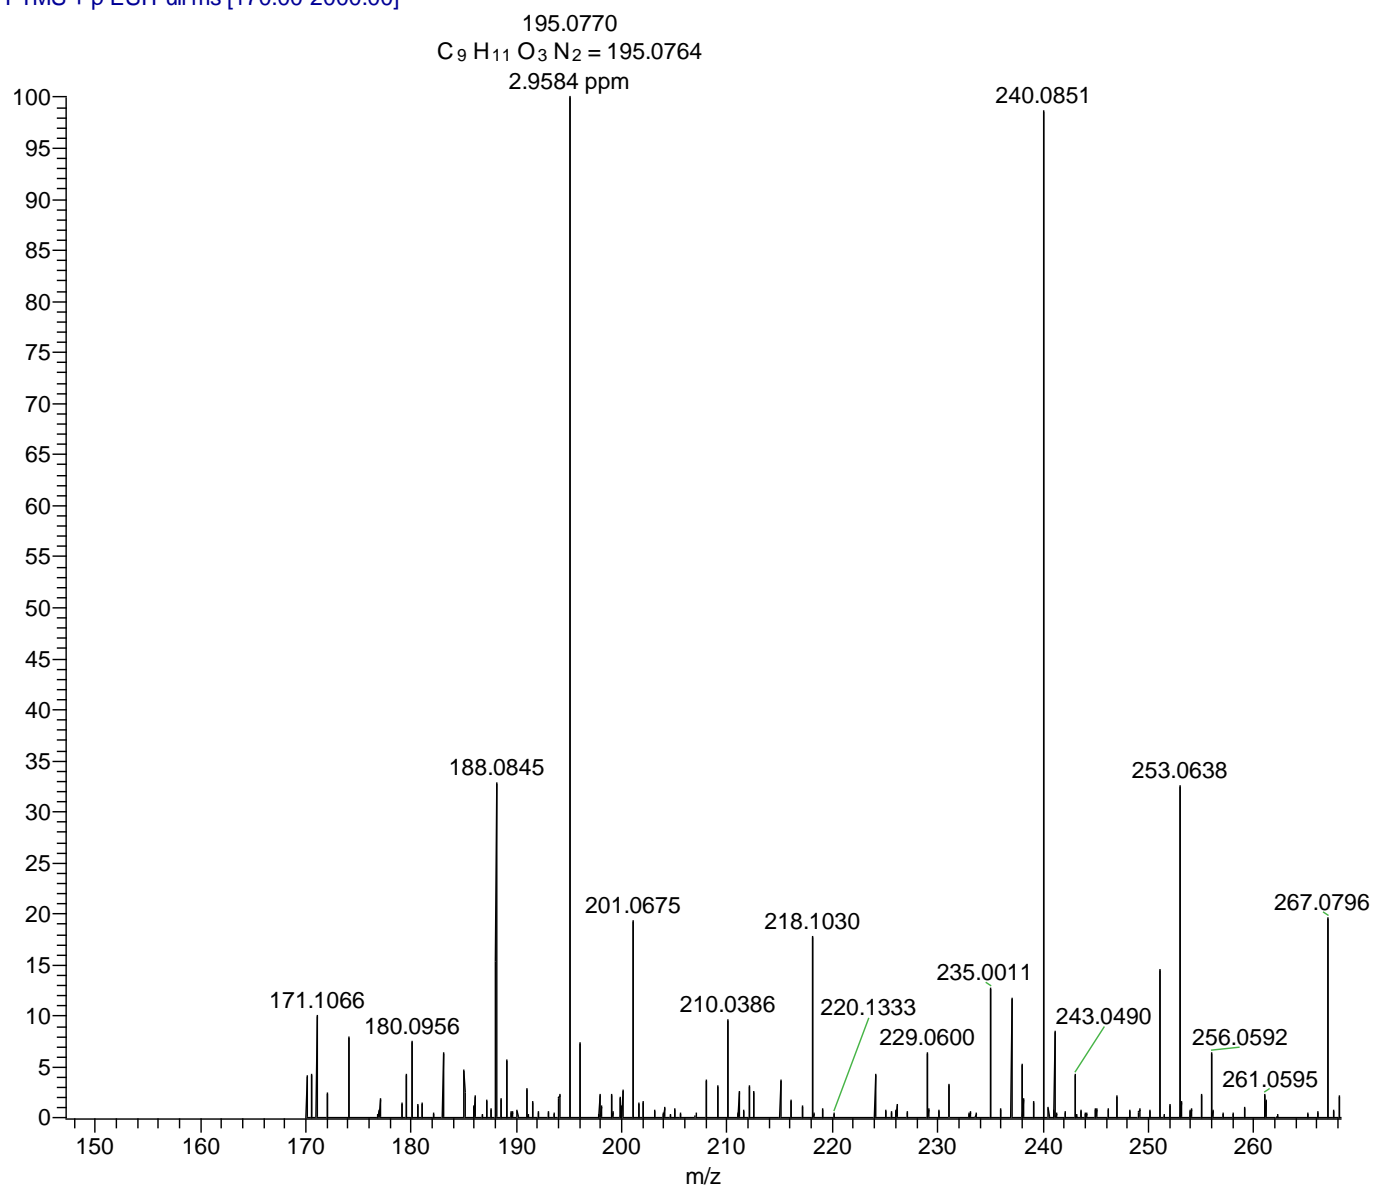

Figure S74. HRESIMS data of compound 7.



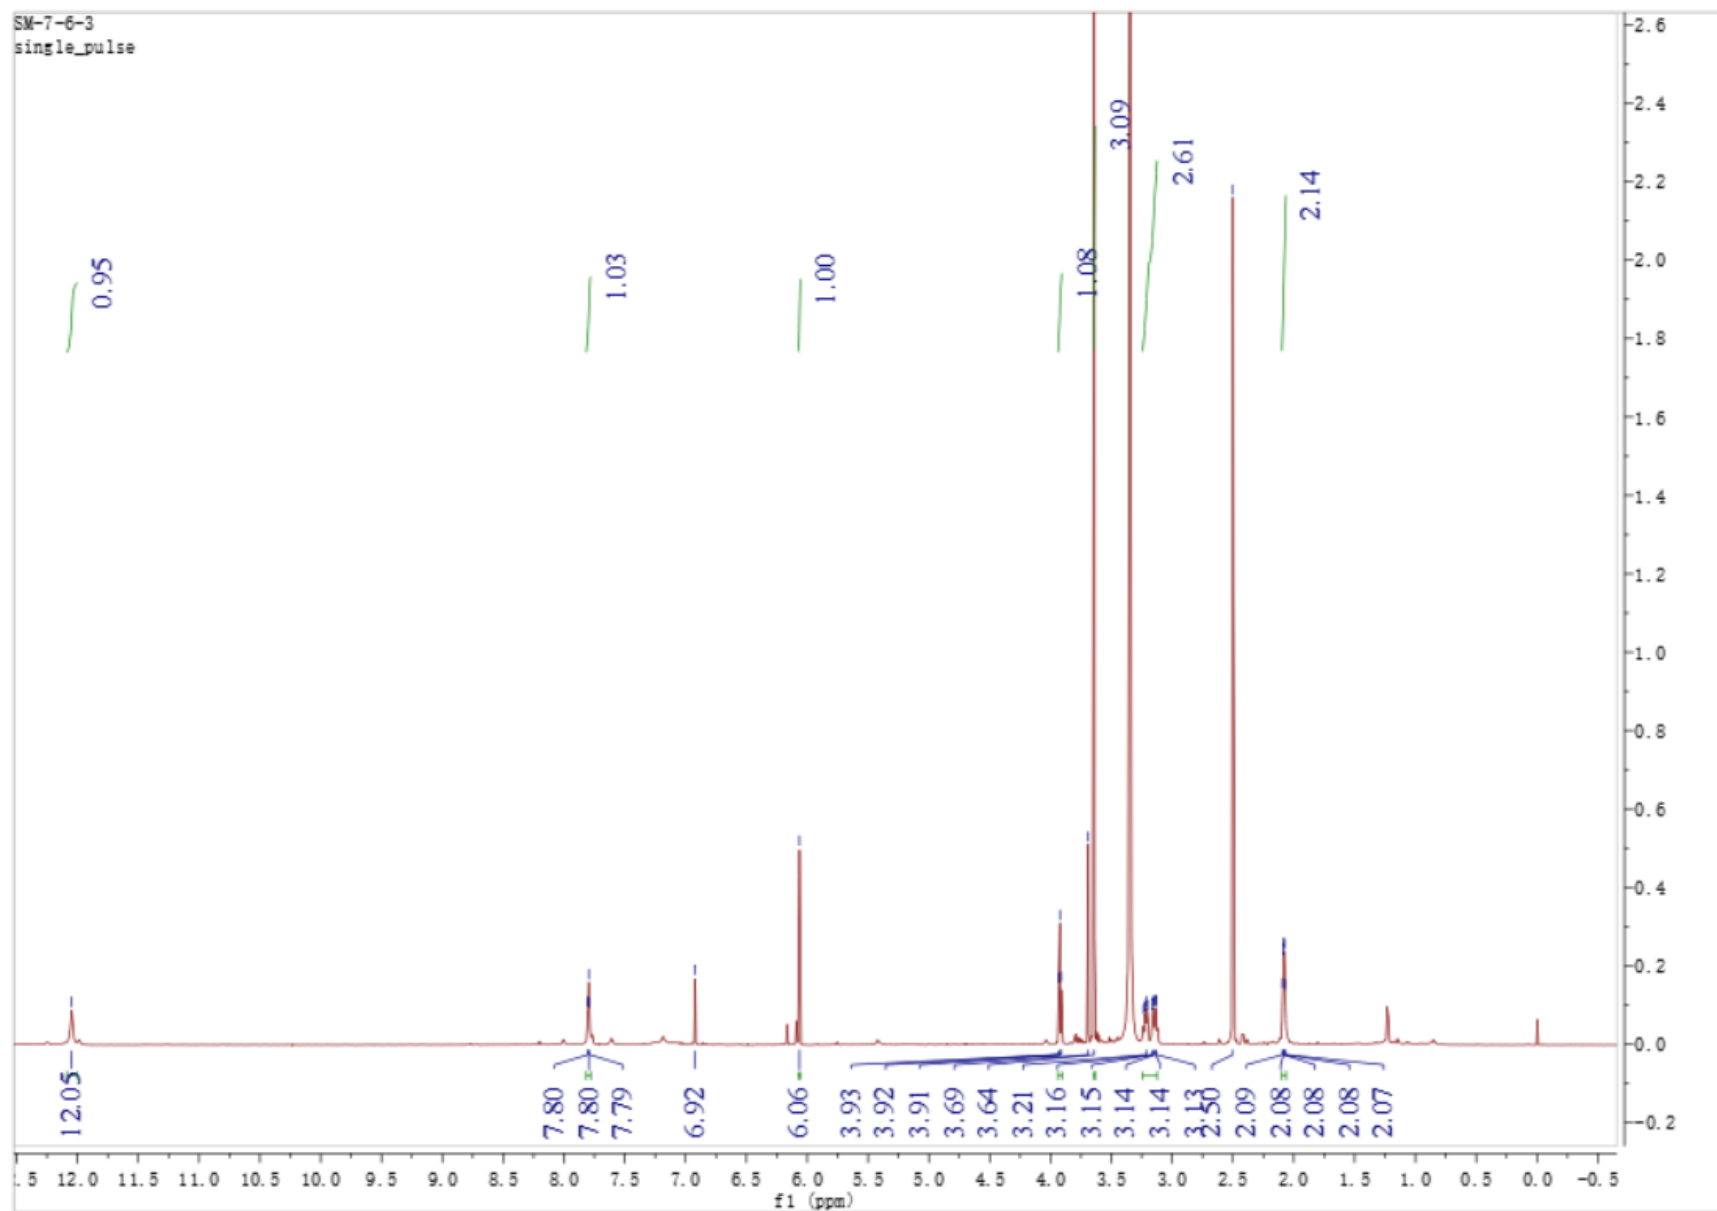

**Figure S75.**  $^1\text{H}$  NMR spectrum of compound **8** in  $\text{DMSO}-d_6$  (500 MHz).

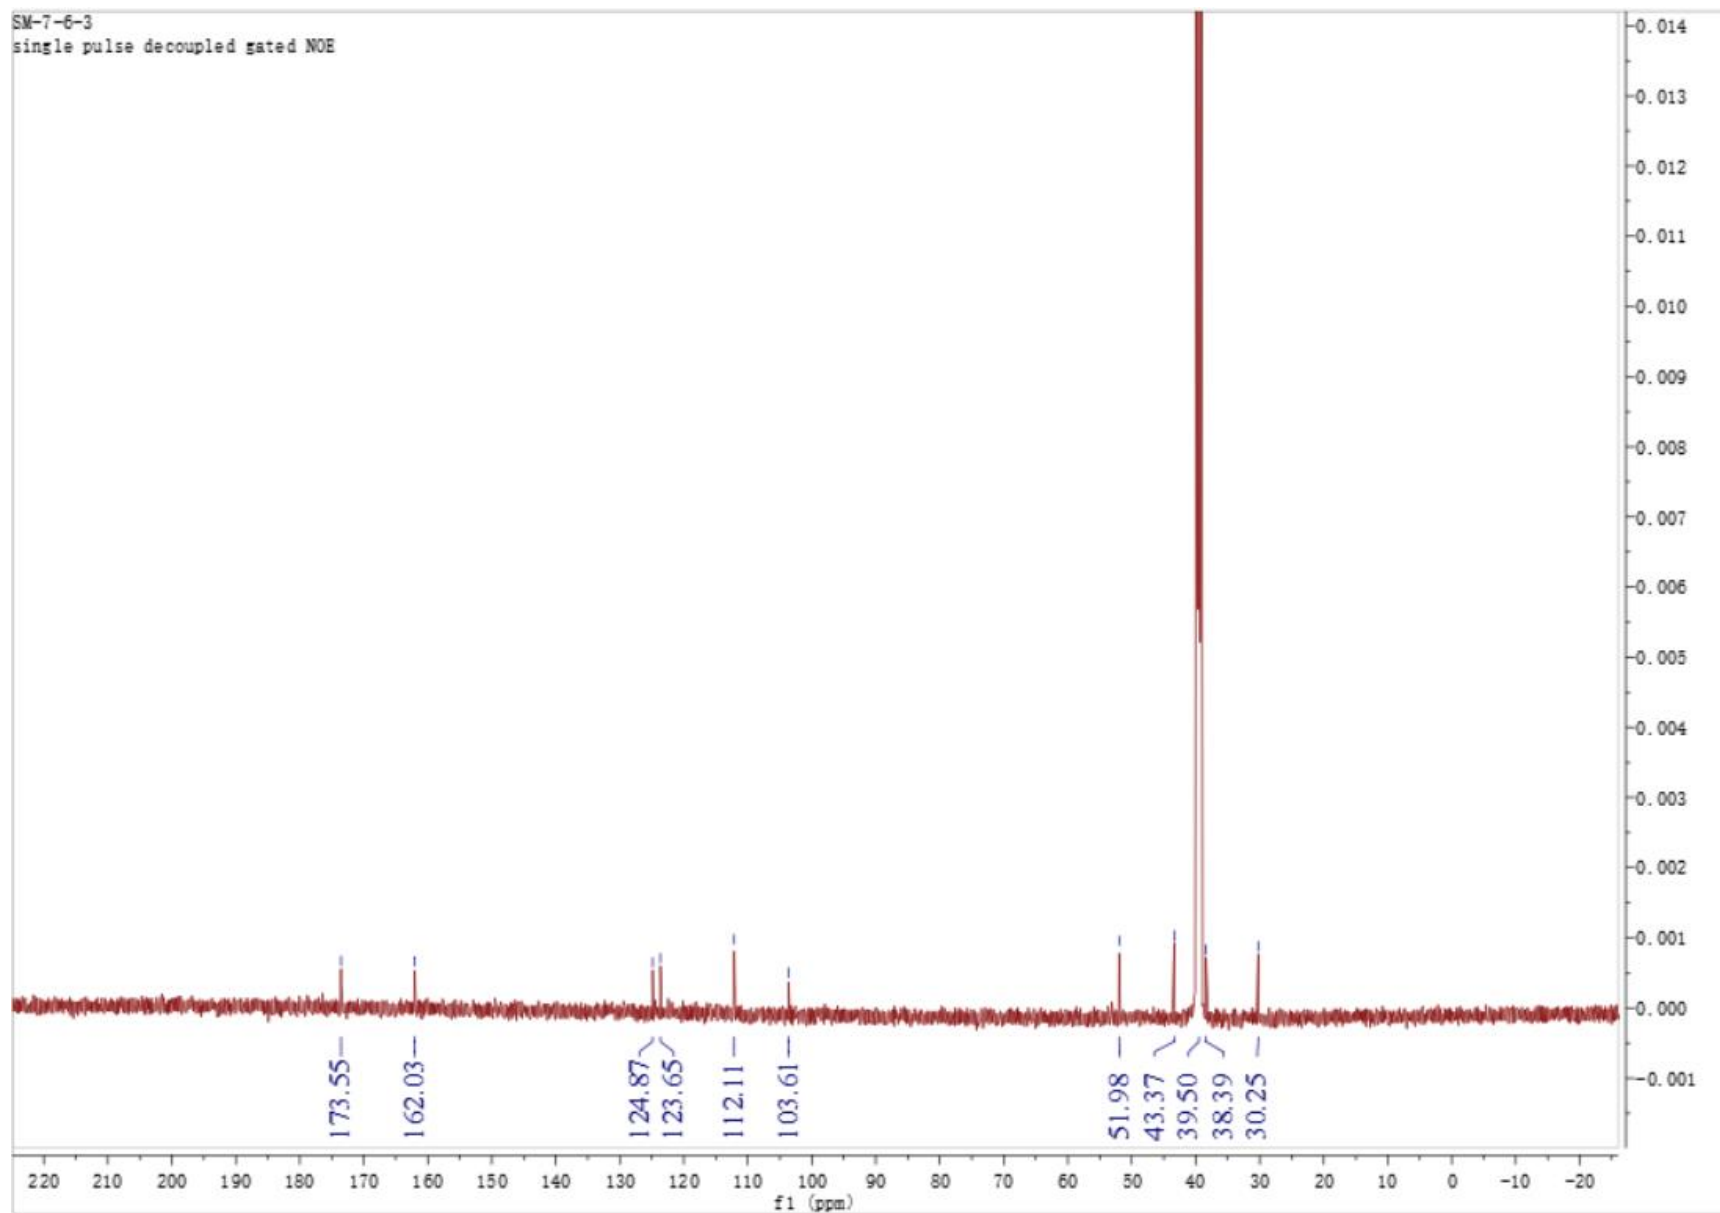

**Figure S76.**  $^{13}\text{C}$  NMR spectrum of compound **8** in  $\text{DMSO}-d_6$  (125 MHz).

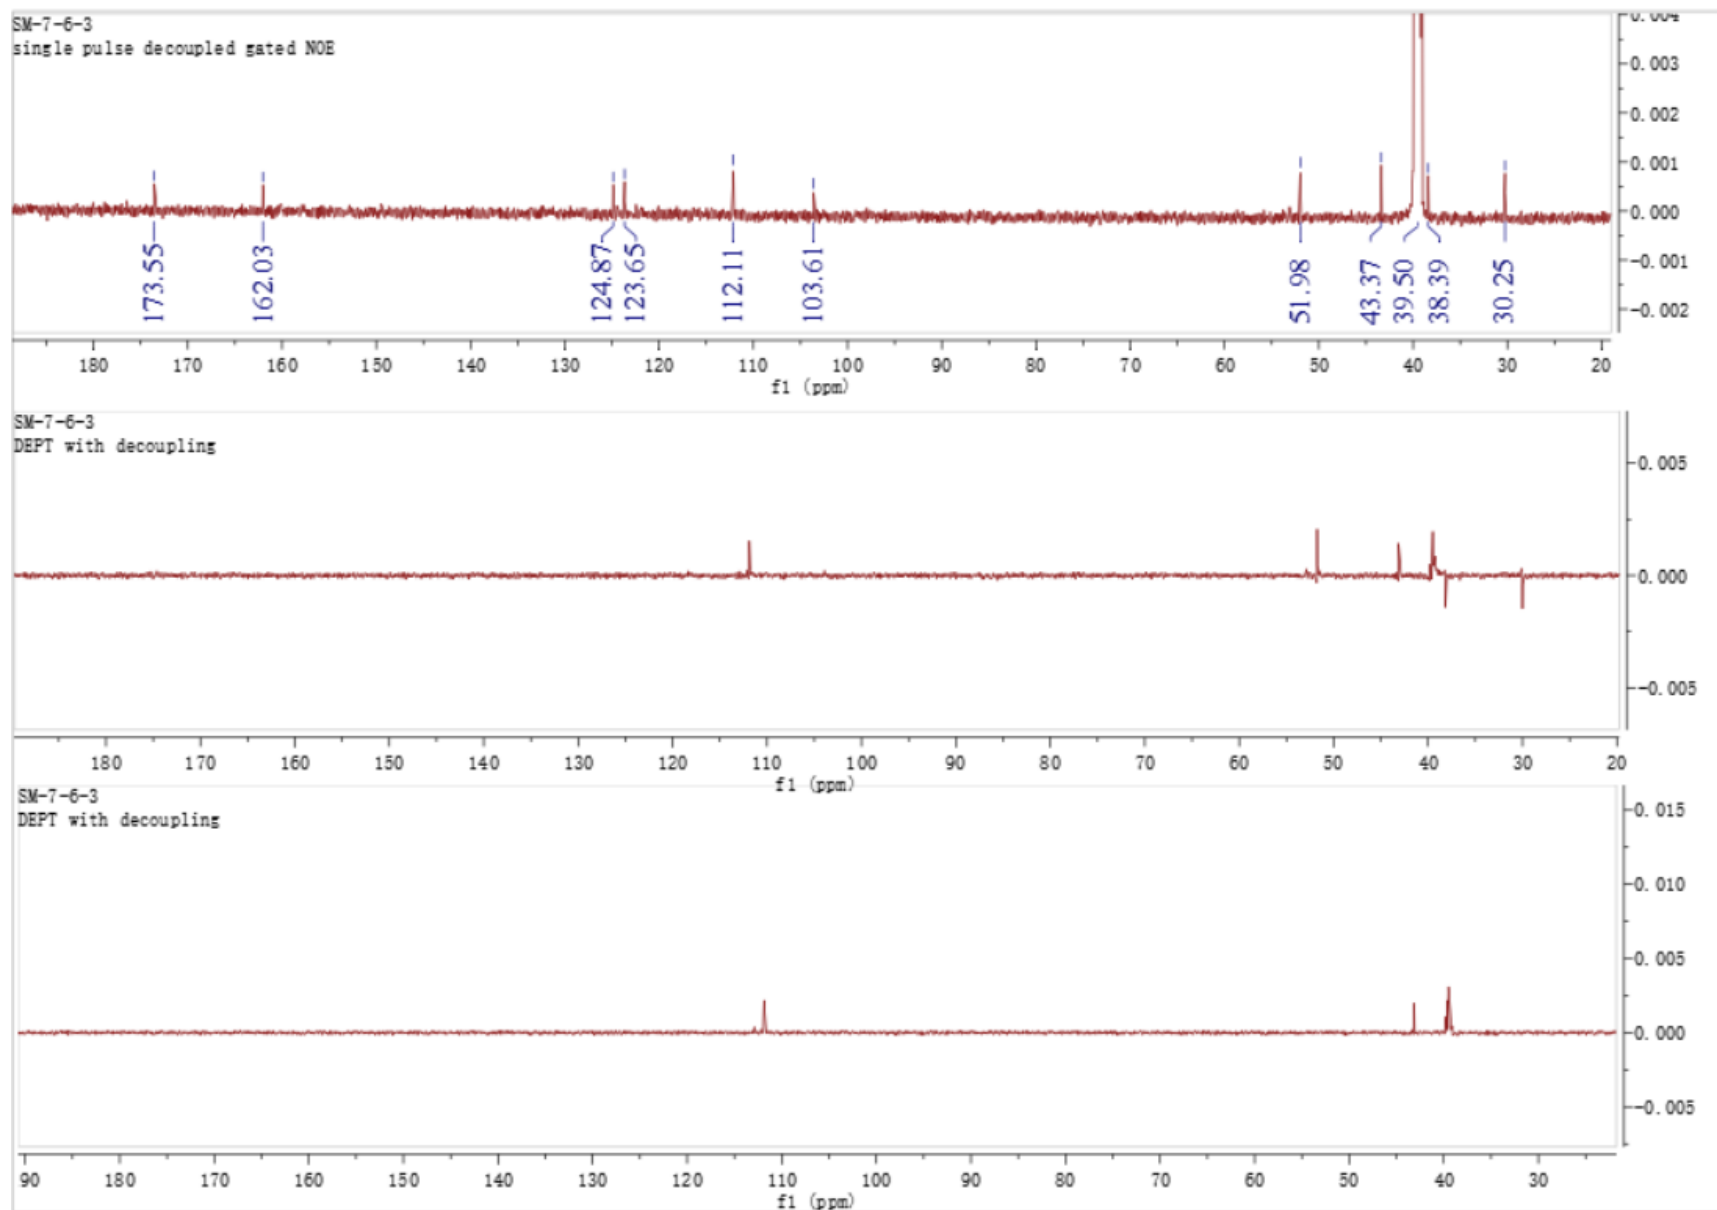

**Figure S77.**  $^{13}\text{C}$  NMR and DEPT spectrum of compound **8** in  $\text{DMSO-}d_6$  (125 MHz)

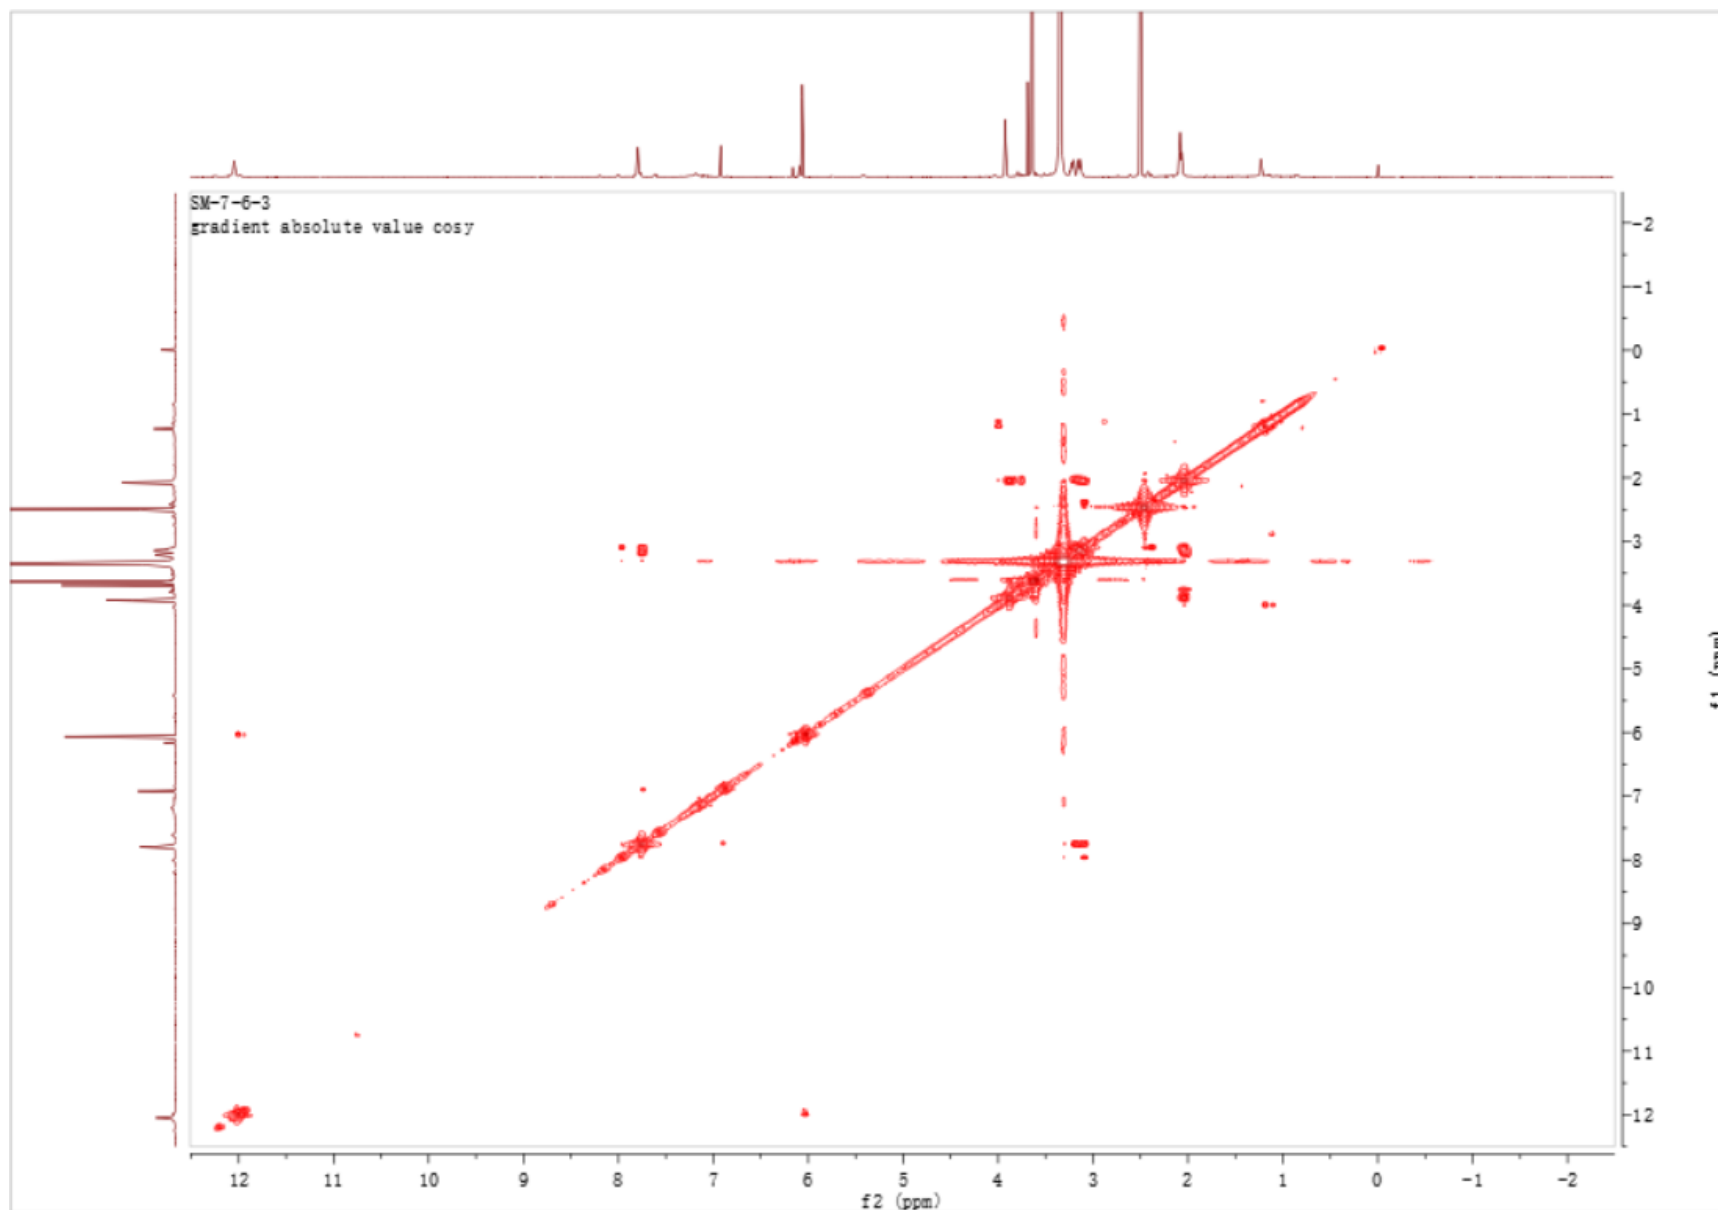

**Figure S78.**  $^1\text{H}$ - $^1\text{H}$  COSY spectrum of compound **8** in  $\text{DMSO}-d_6$  (500 MHz).

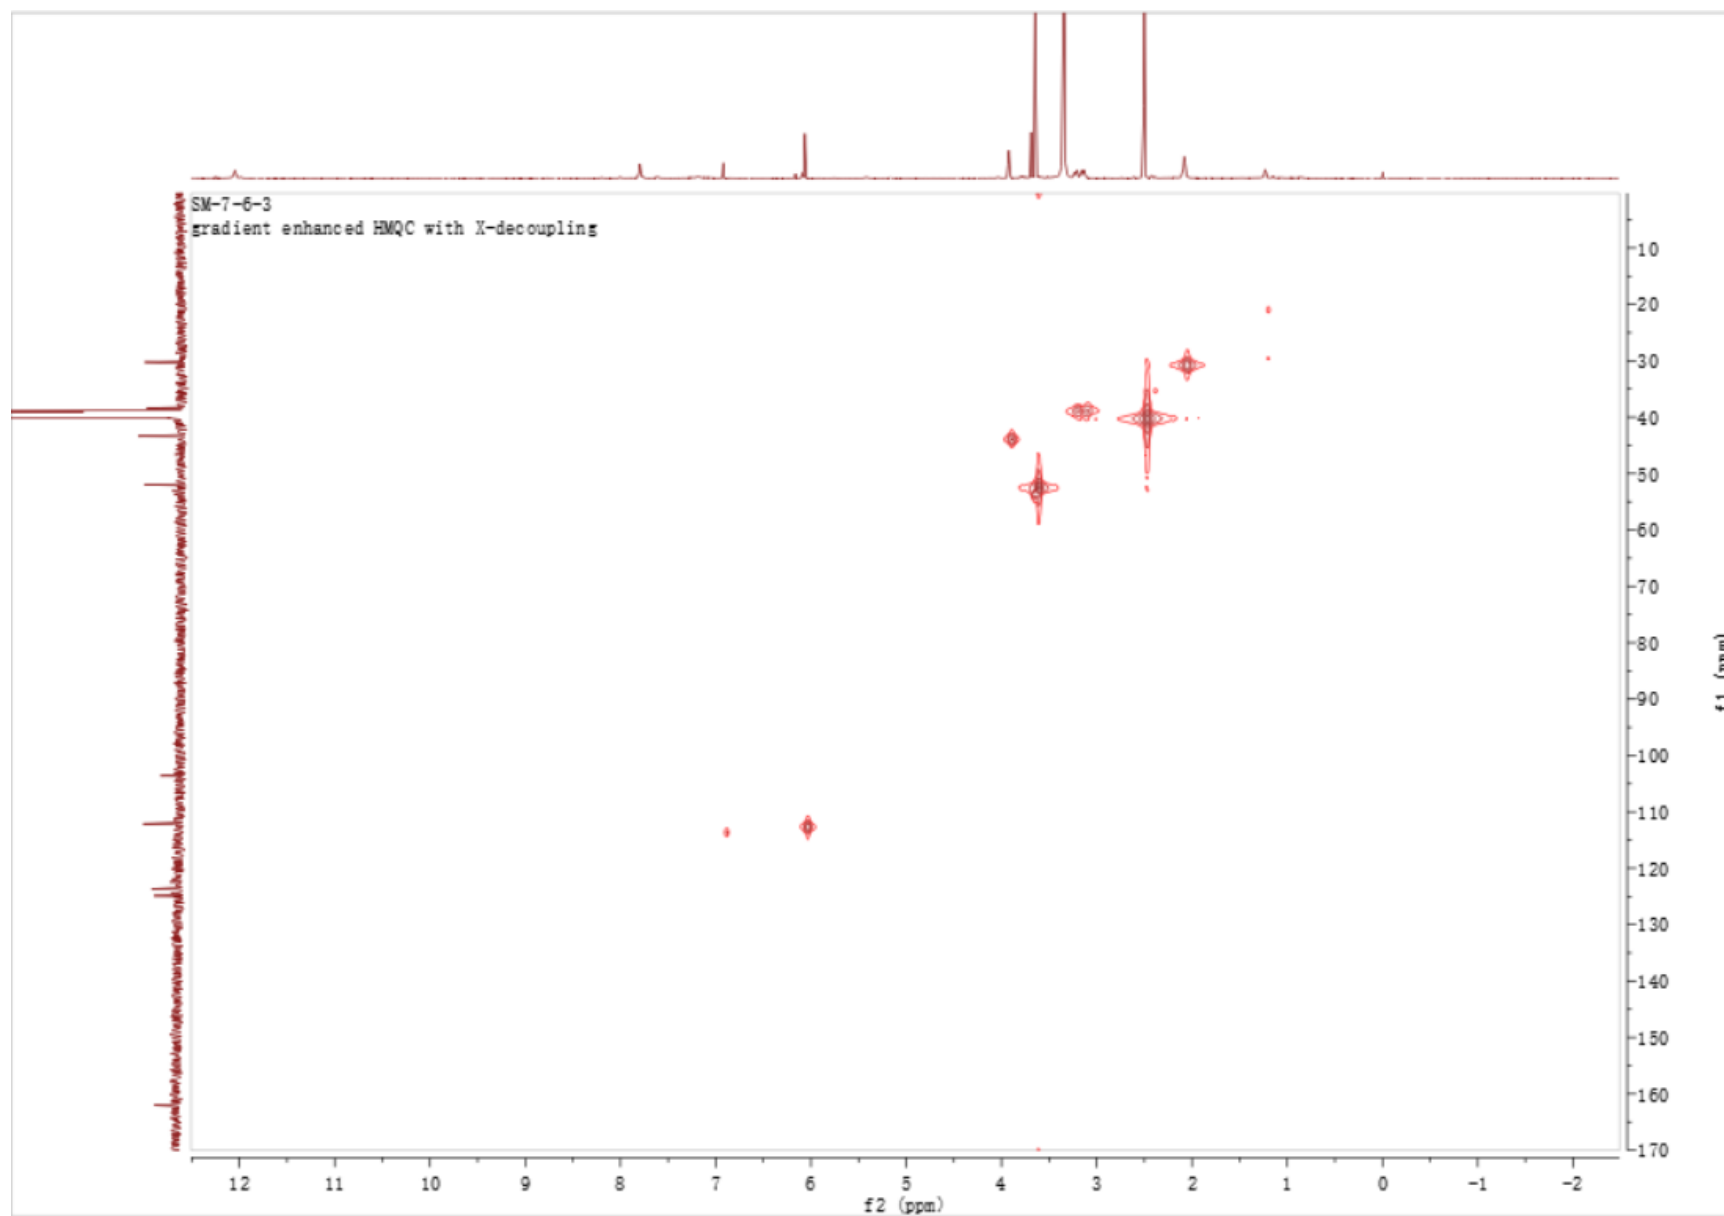

**Figure S79.** HSQC spectrum of compound **8** in DMSO-*d*<sub>6</sub> (500 MHz).

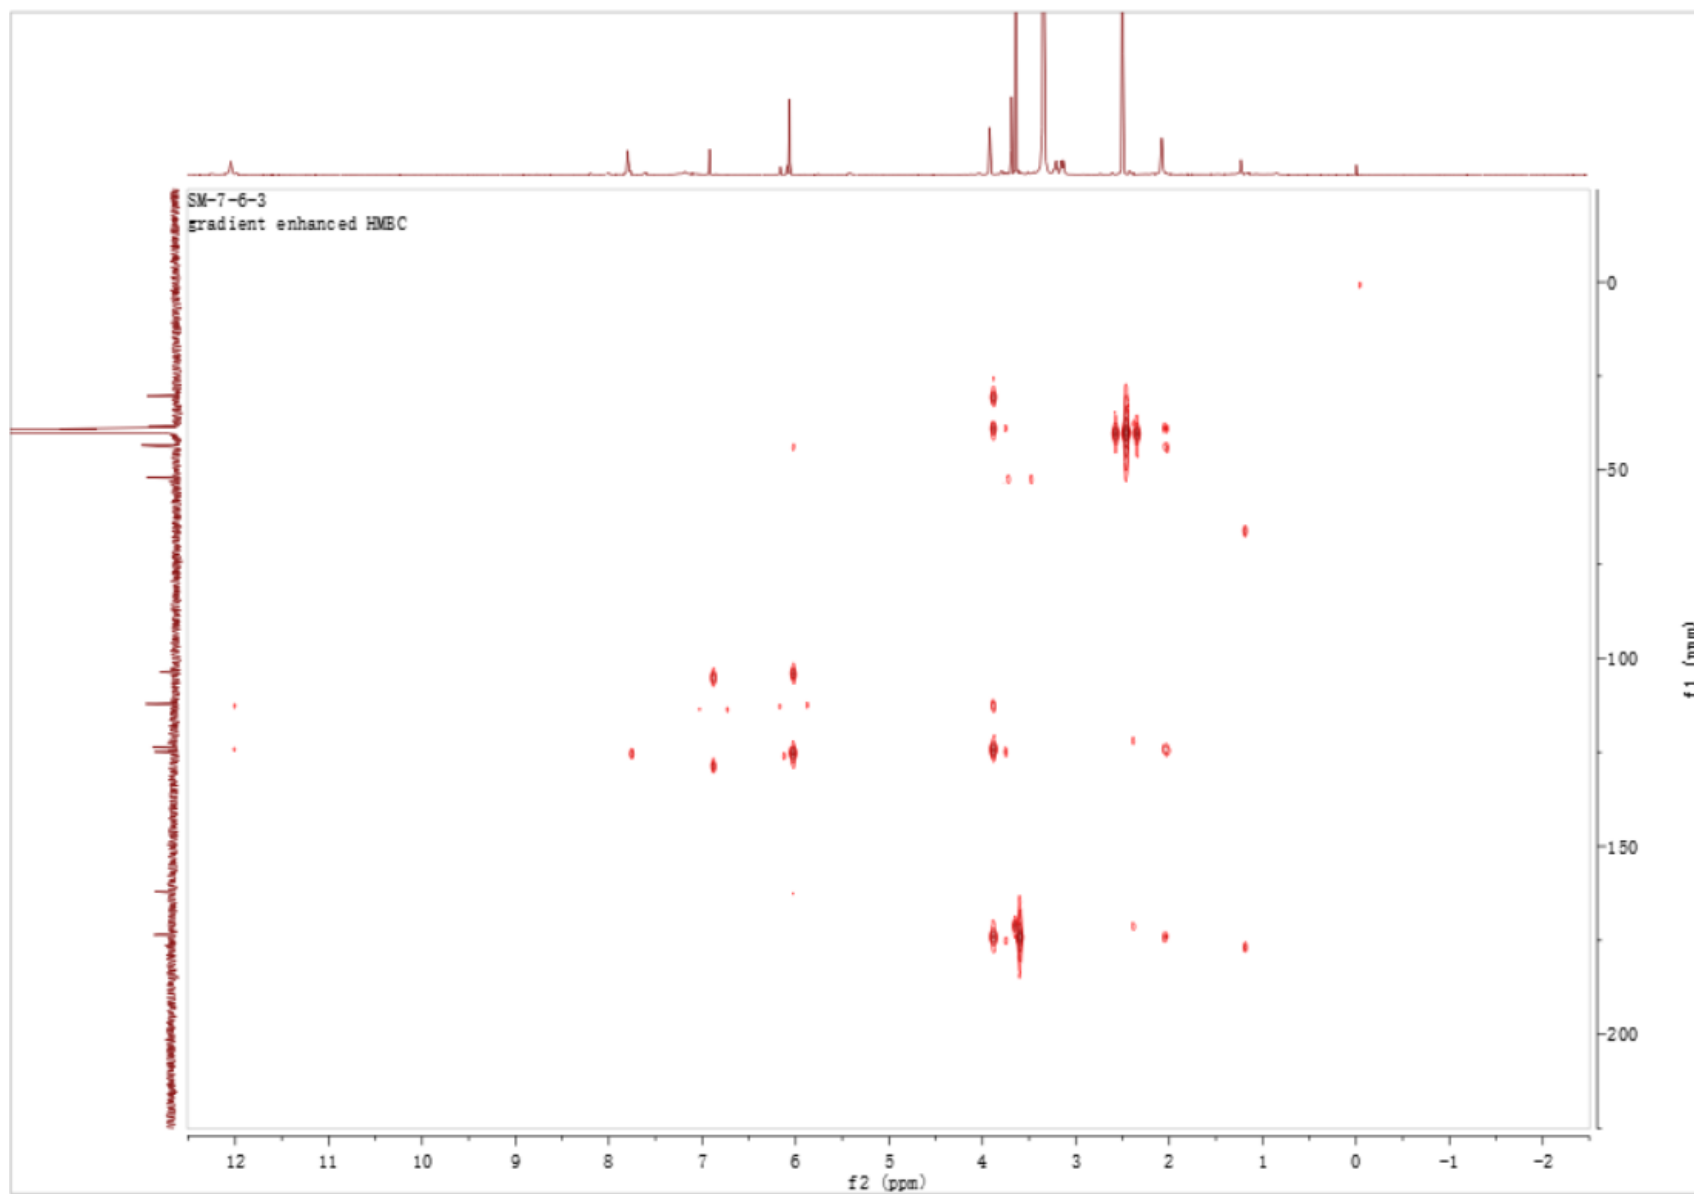

**Figure S80.** HMBC spectrum of compound **8** in DMSO- $d_6$  (500 MHz).

20210831-SM-7-6-3\_210831093738 #37 RT: 0.38 AV: 1 SB: 10 0.10-0.20 NL: 3.45E6  
T: FTMS + p ESI Full ms [150.00-1000.00]

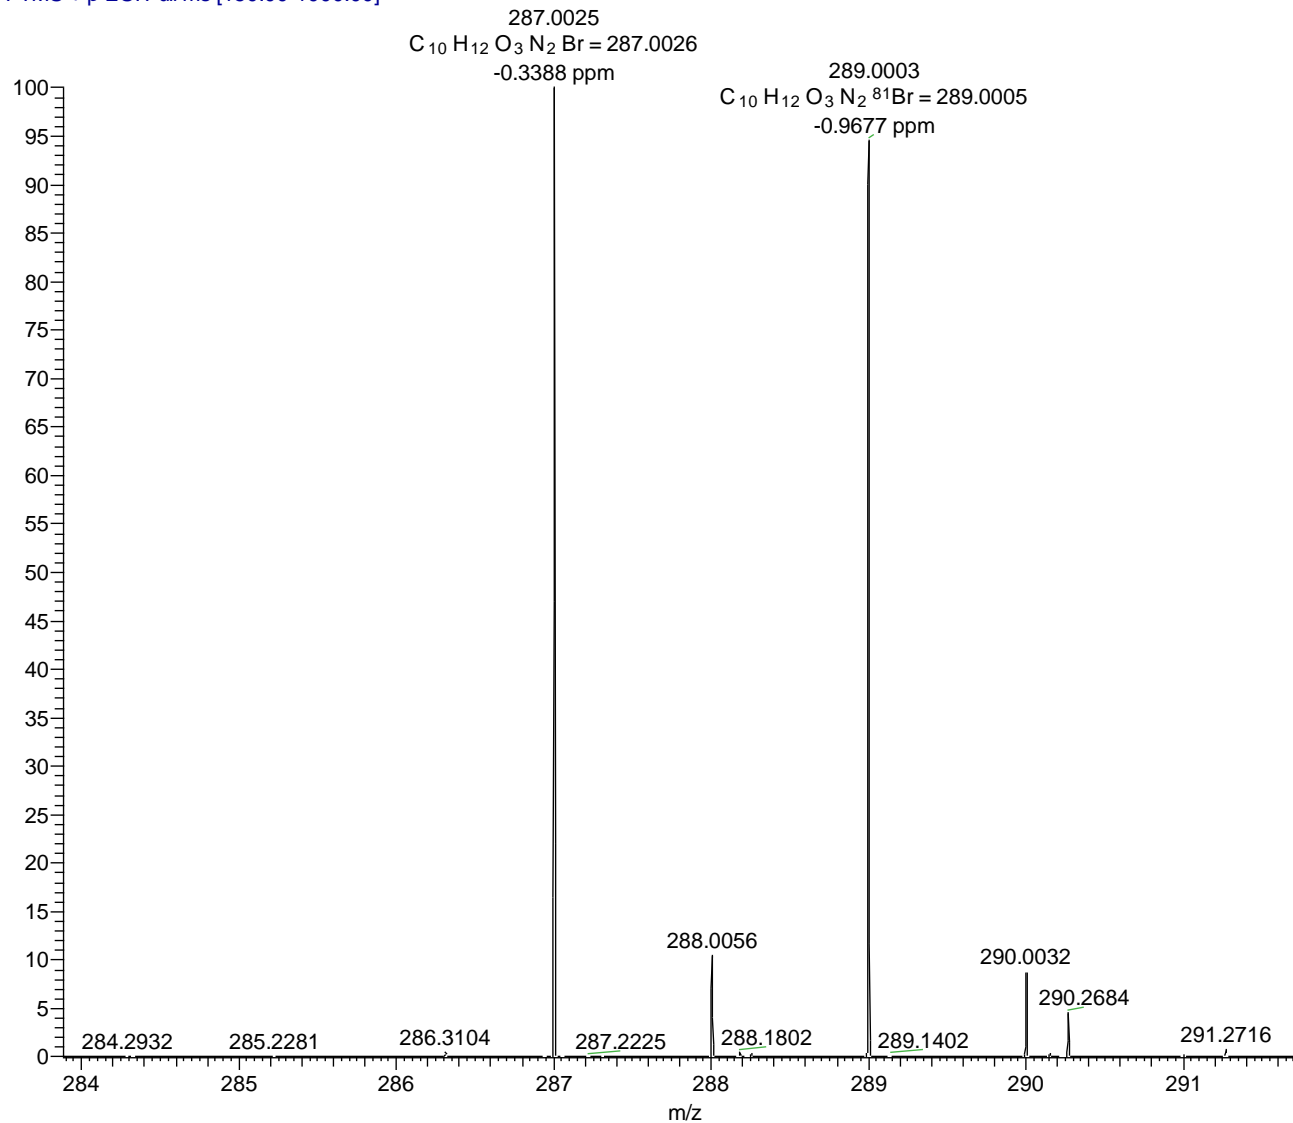

Figure S81. HRESIMS data of compound 8.

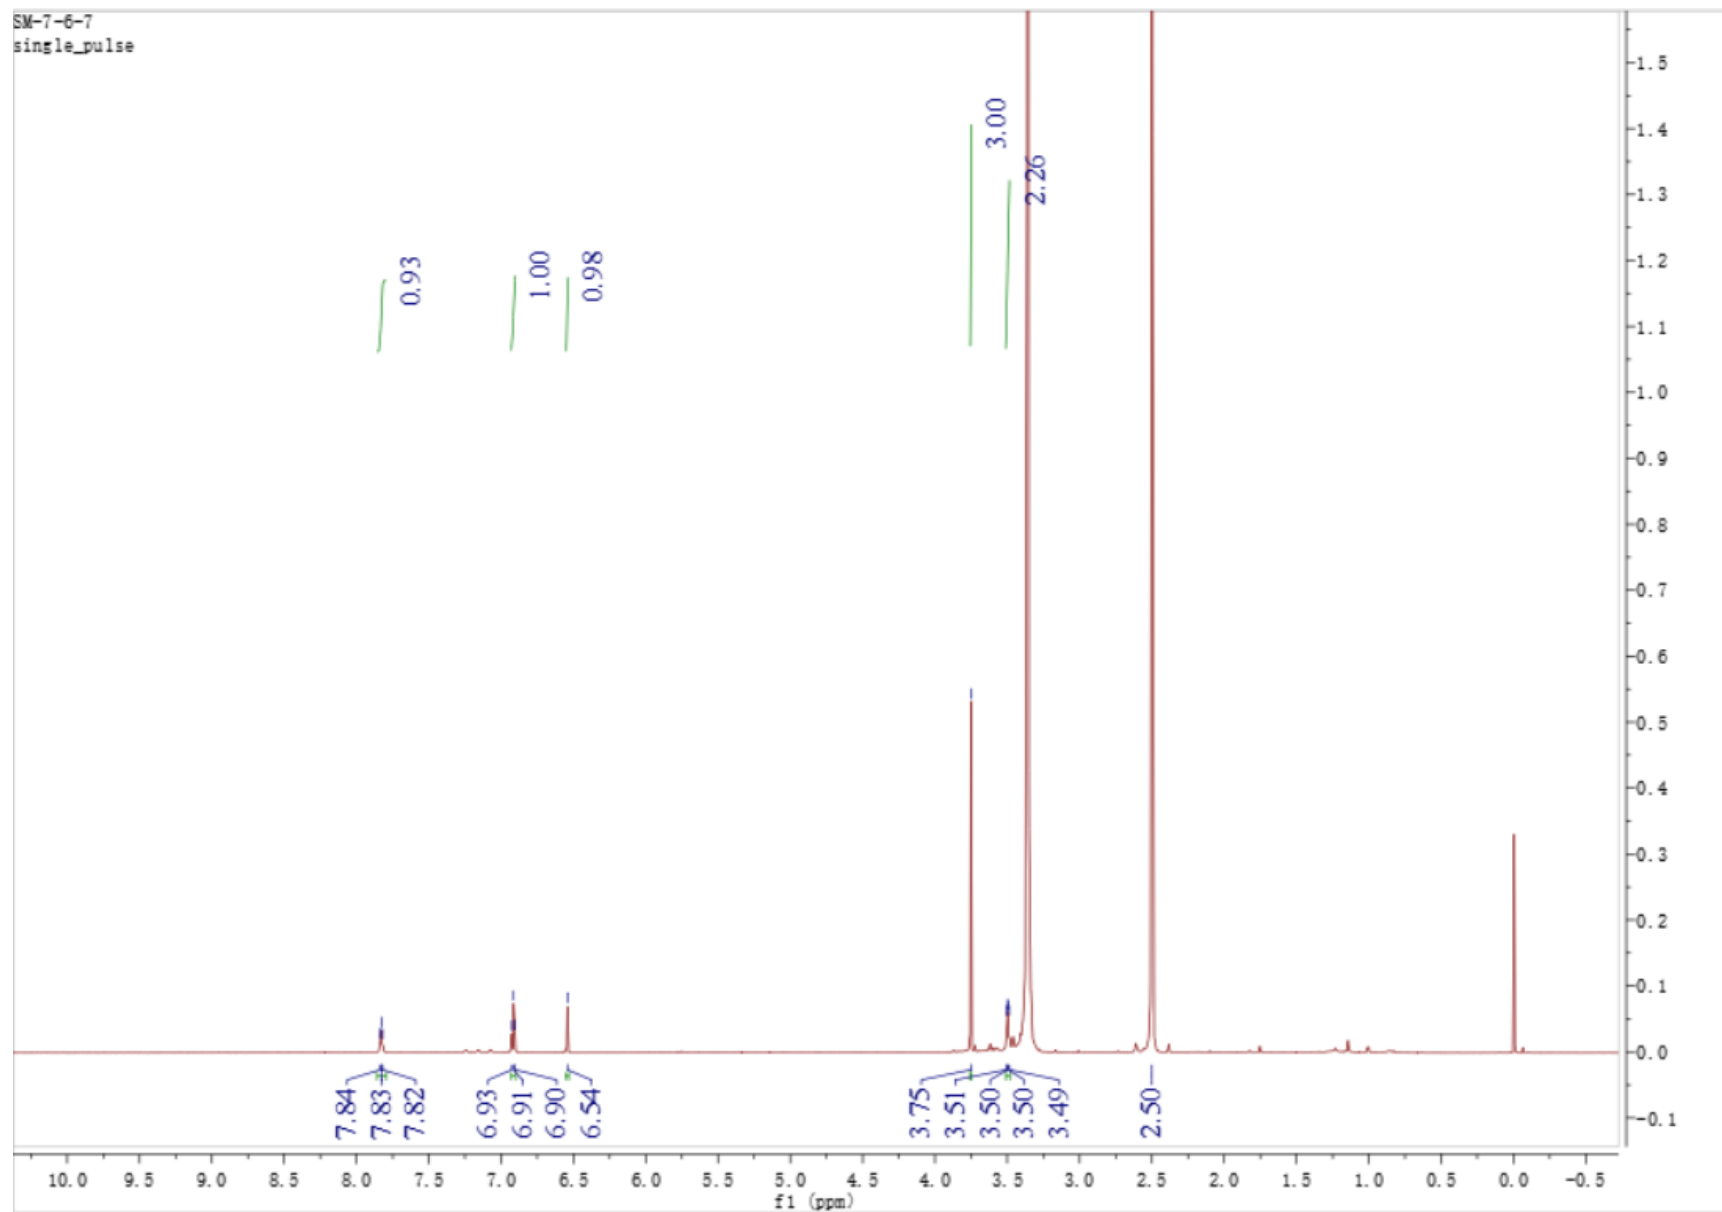

**Figure S82.**  $^1\text{H}$  NMR spectrum of compound **9** in  $\text{DMSO}-d_6$  (500 MHz).



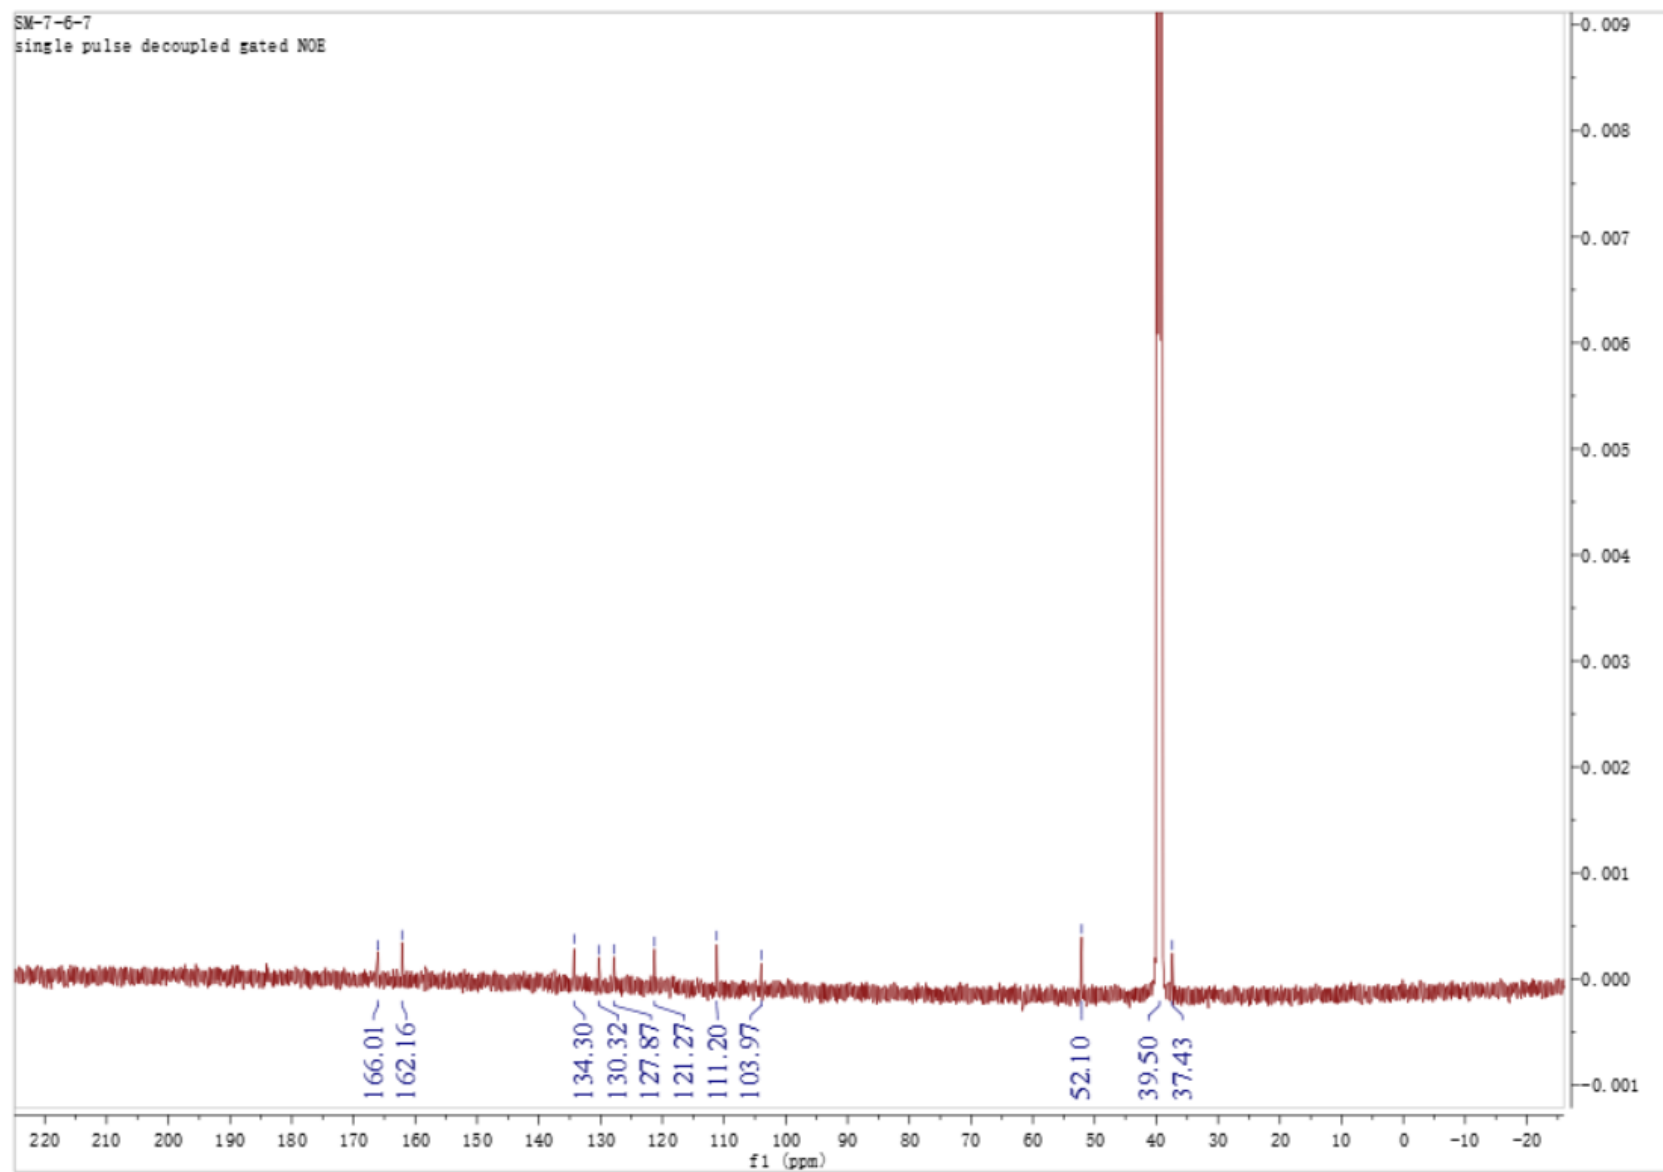

**Figure S83.**  $^{13}\text{C}$  NMR spectrum of compound **9** in  $\text{DMSO-}d_6$  (125 MHz).

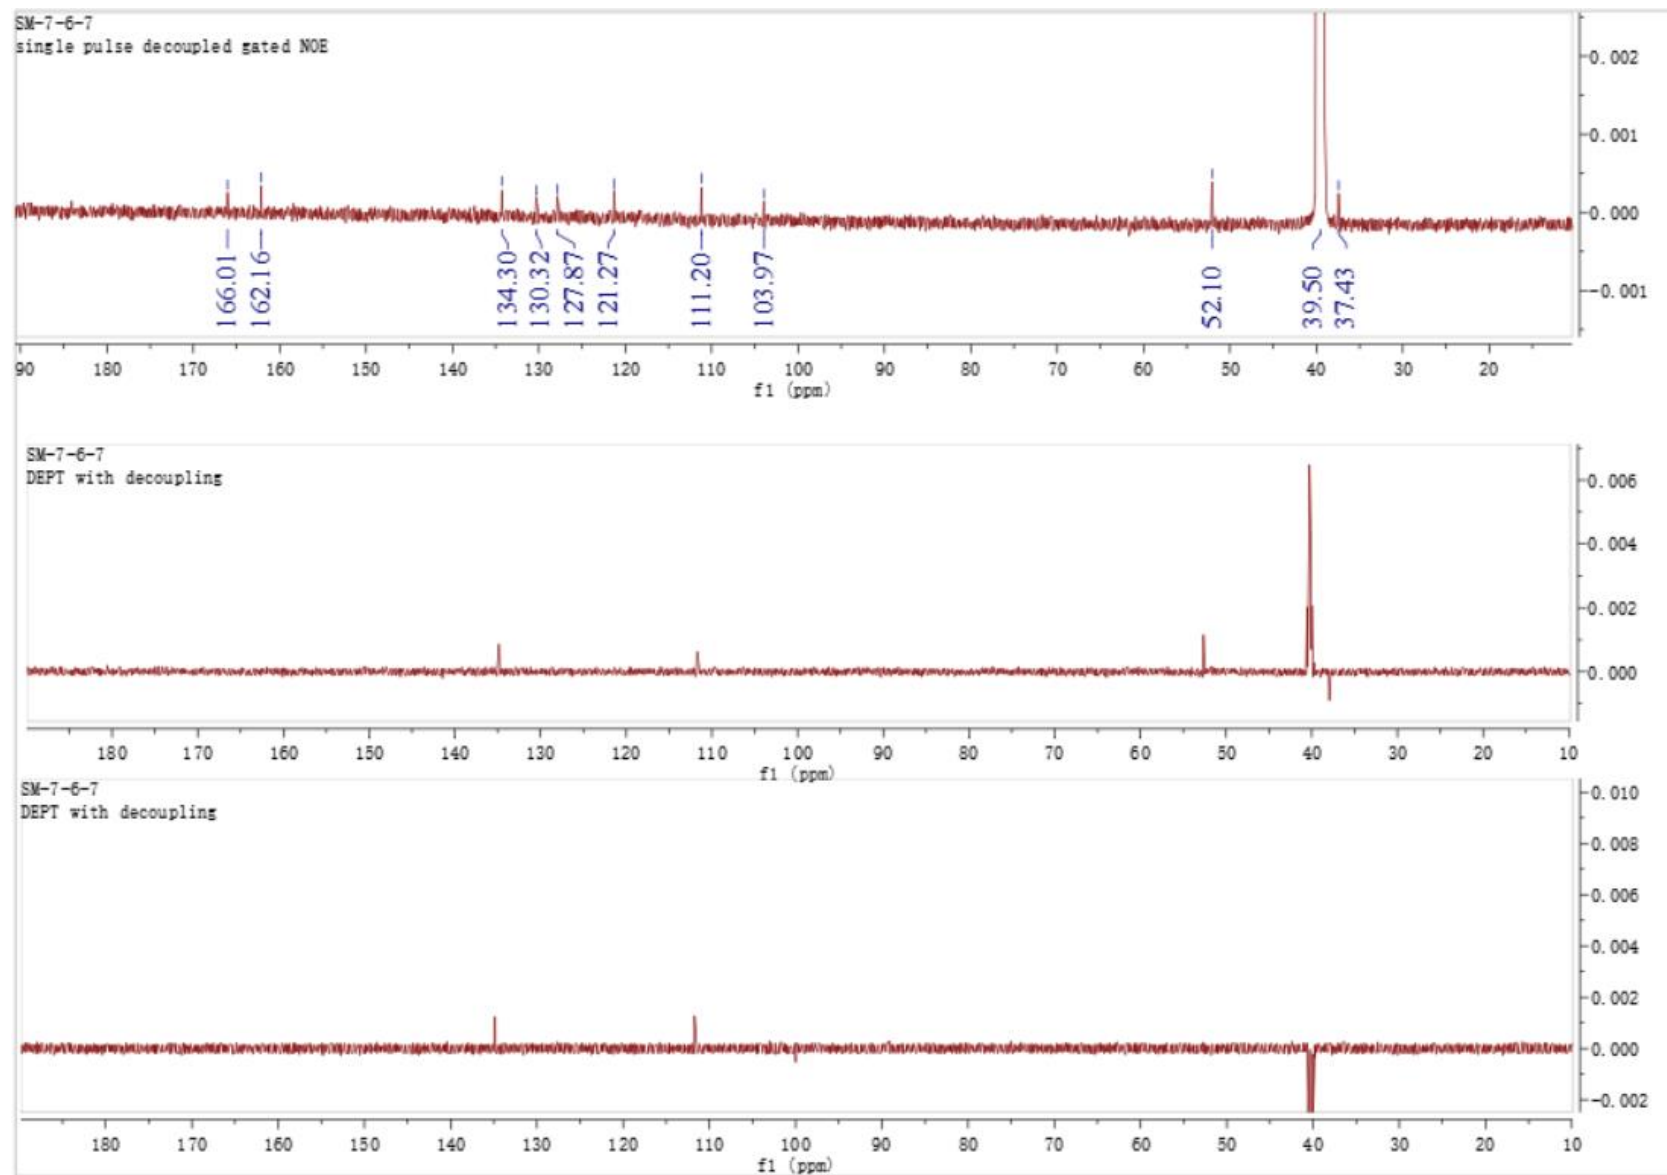

**Figure S84.**  $^{13}\text{C}$  NMR and DEPT spectrum of compound 9 in  $\text{DMSO}-d_6$  (125 MHz).



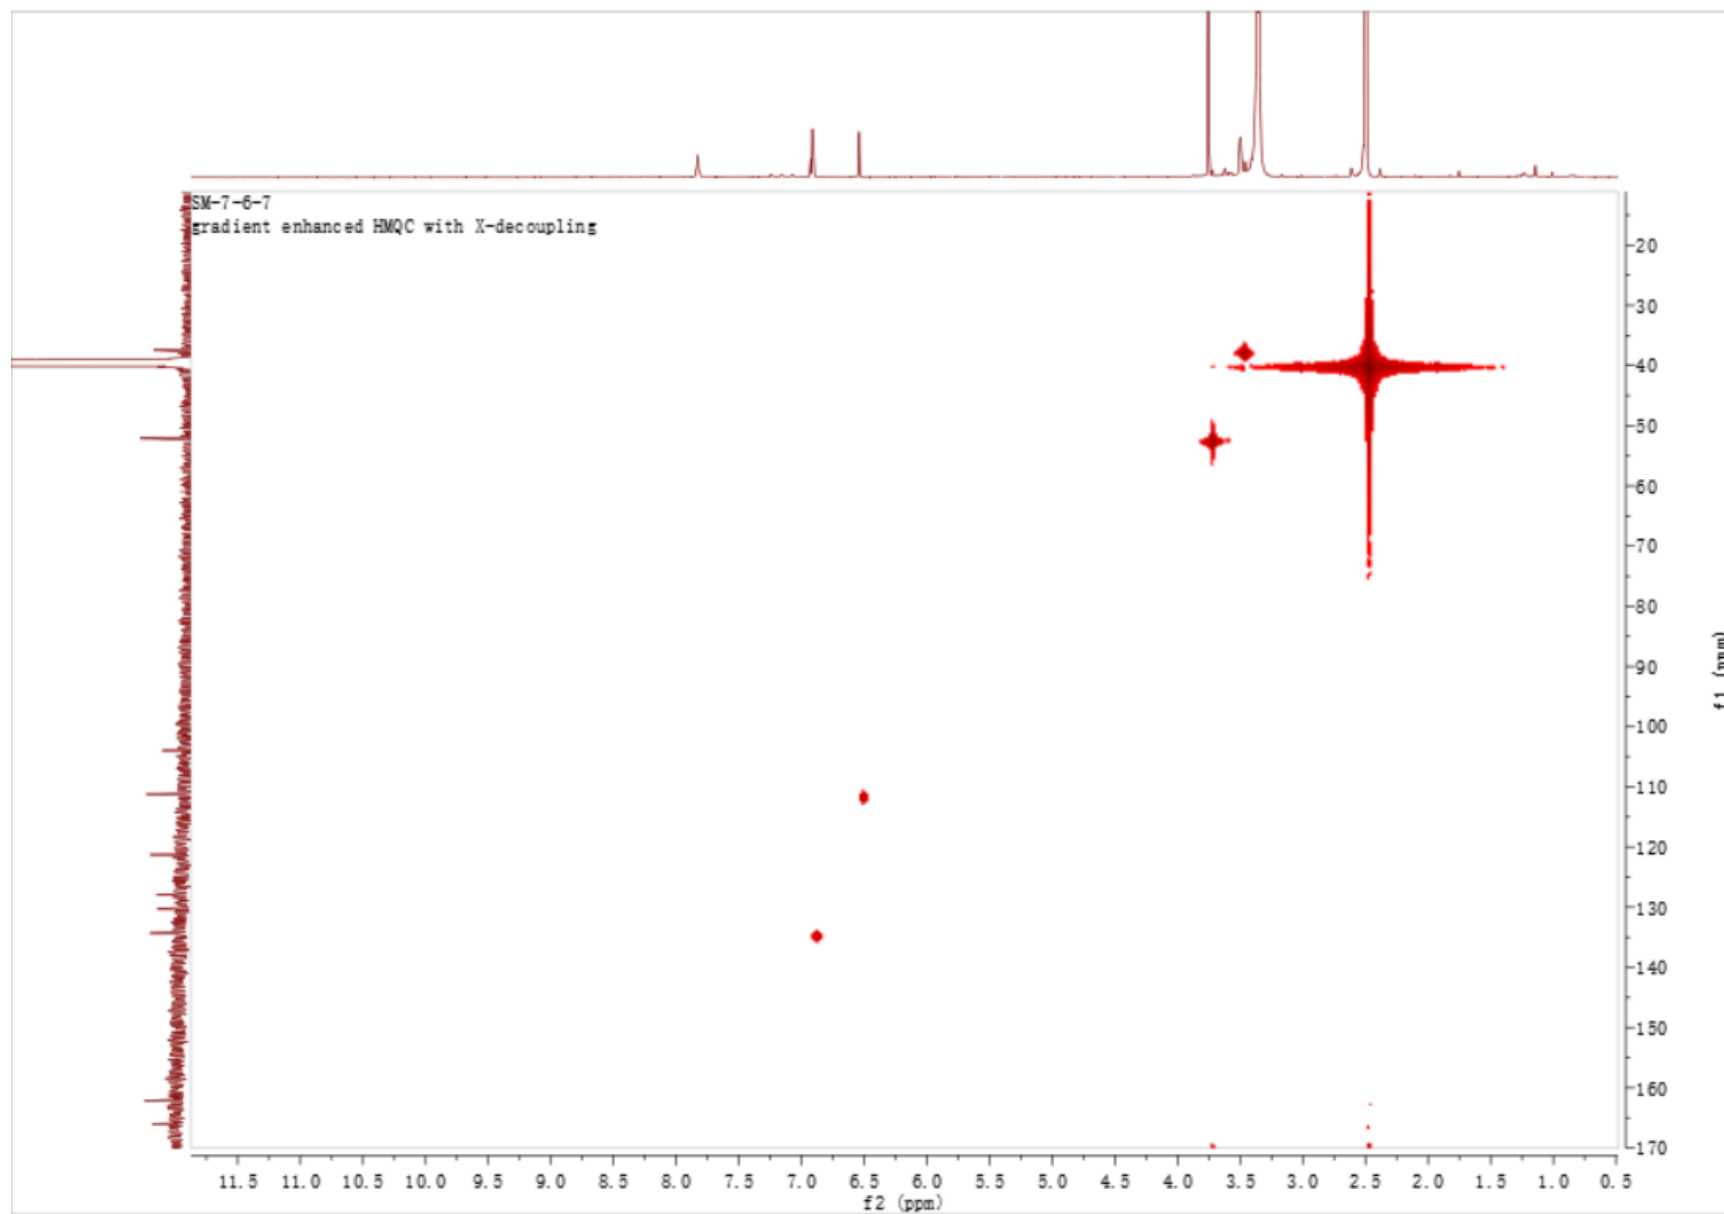

**Figure S86.** HSQC spectrum of compound **9** in DMSO-*d*<sub>6</sub> (500 MHz).

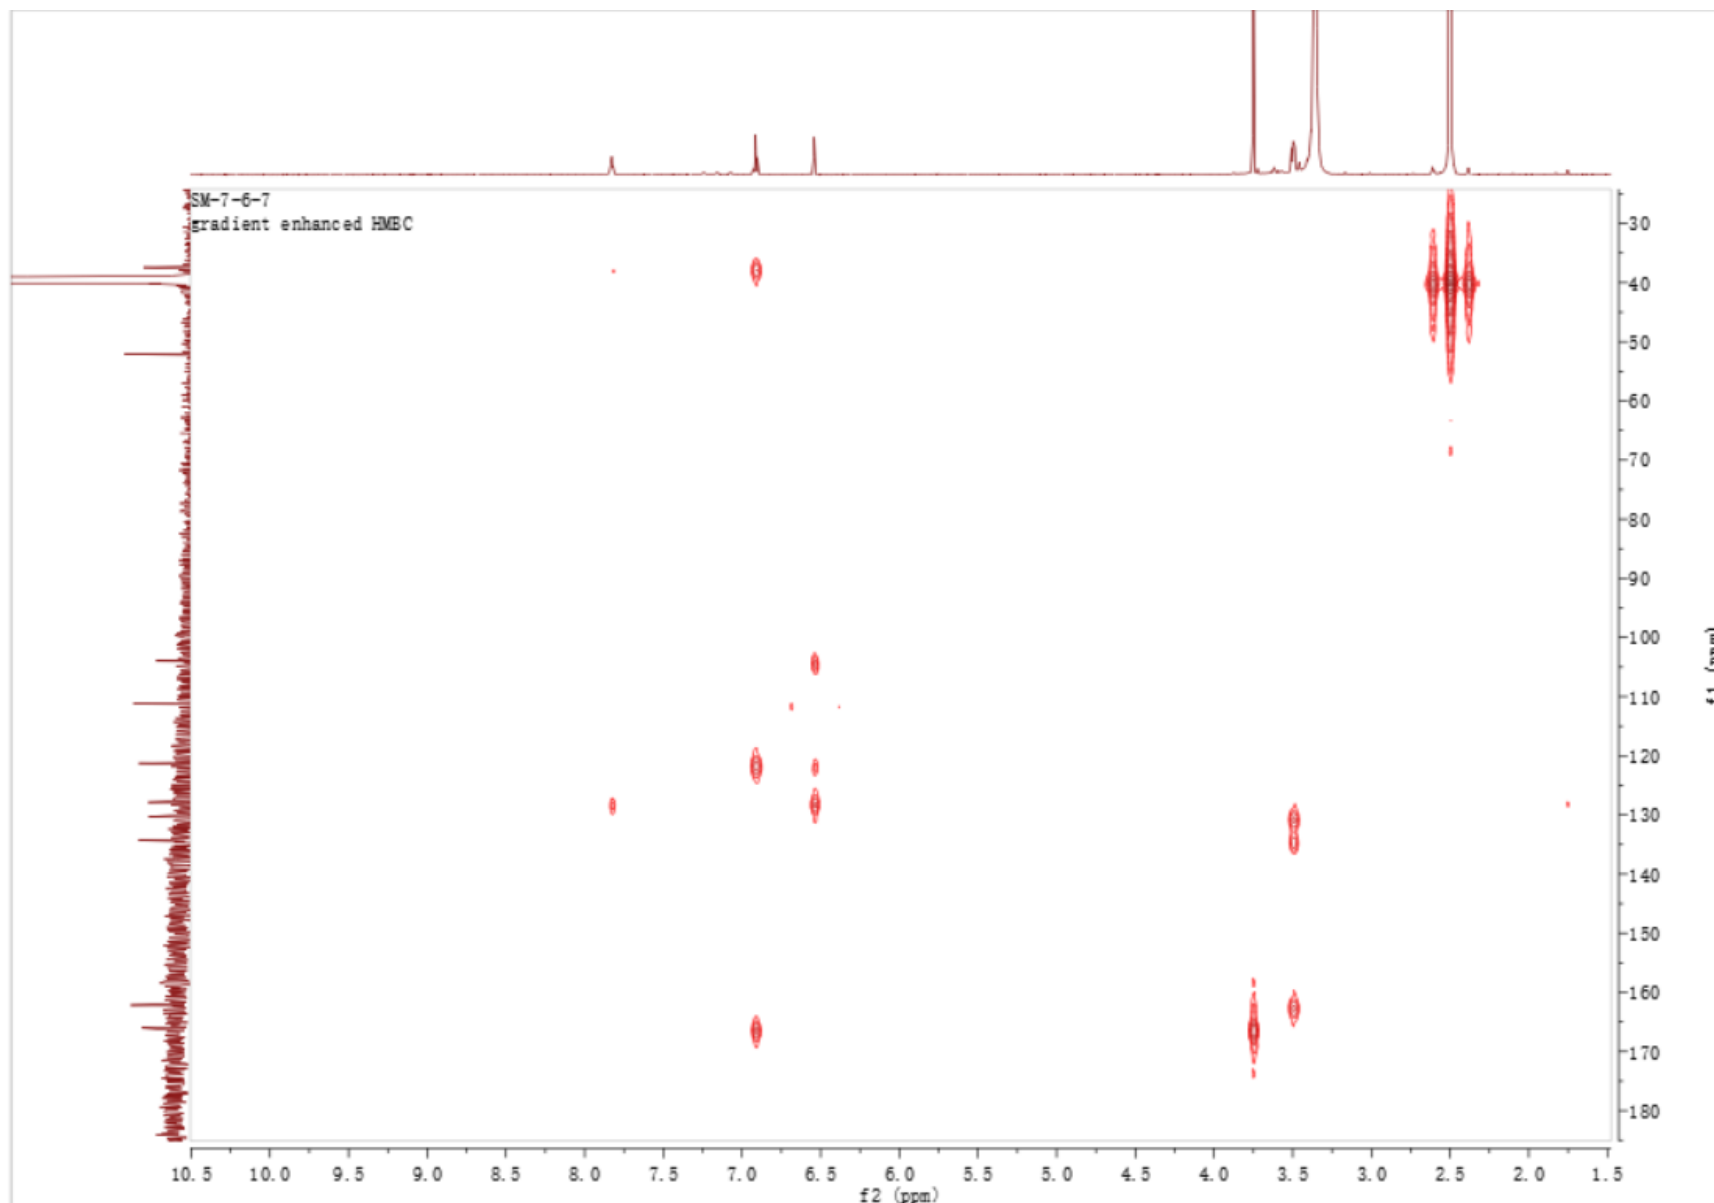

**Figure S87.** HMBC spectrum of compound **9** in DMSO-*d*<sub>6</sub> (500 MHz).

20210831-SM-7-6-7\_210831093738 #4 RT: 0.03 AV: 1 NL: 2.12E5

T: FTMS + p ESI Full ms [150.00-1000.00]

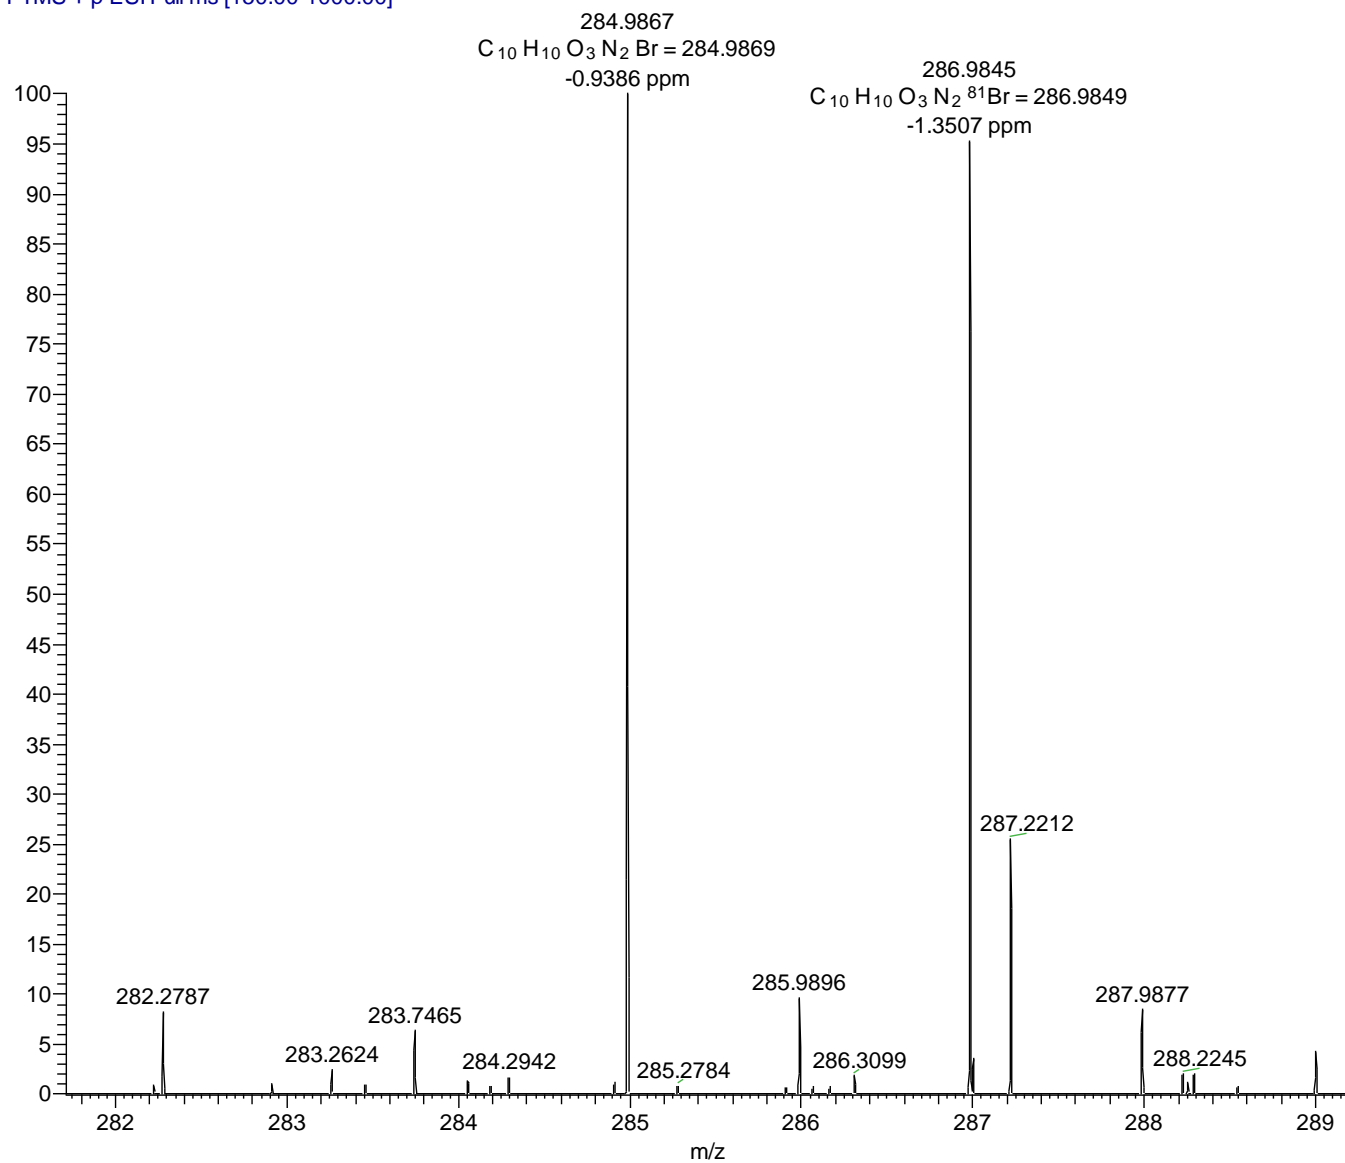

Figure S88. HRESIMS data of compound 9.

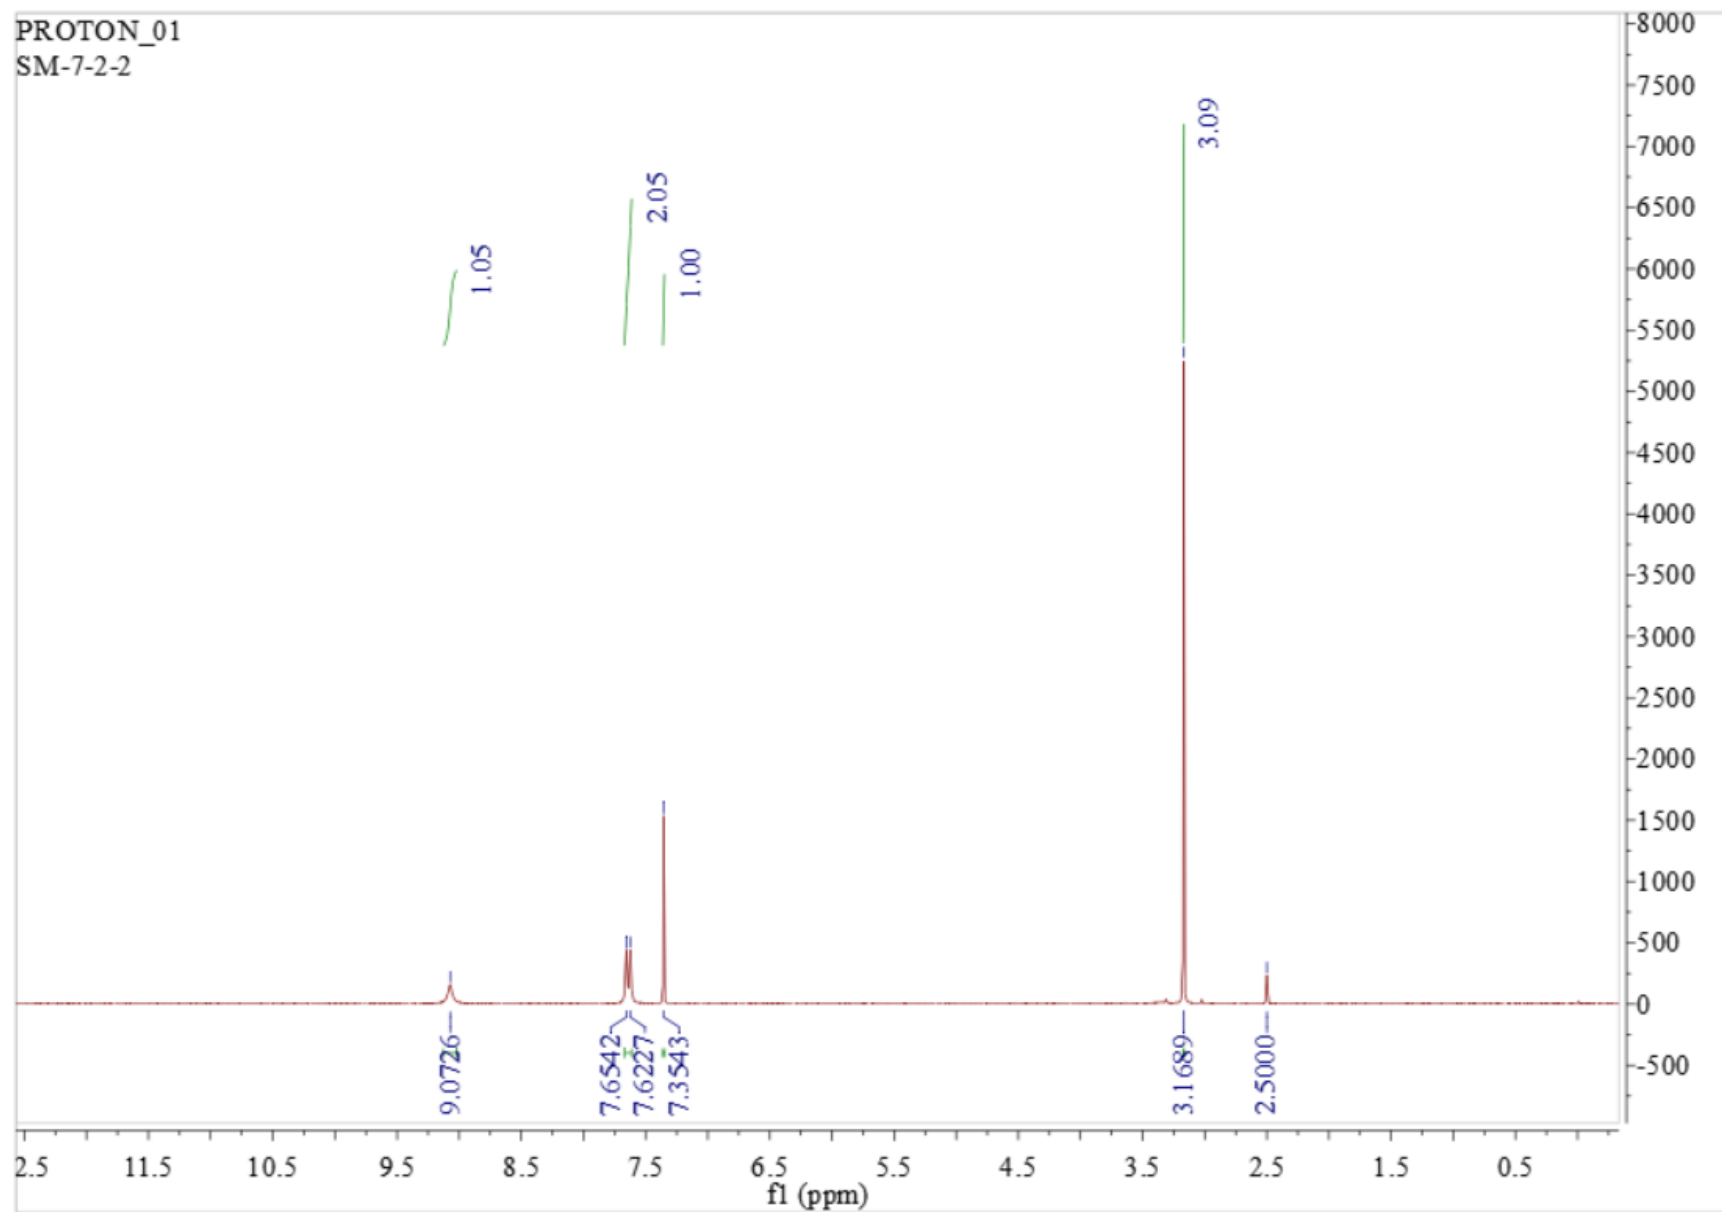

**Figure S89.** <sup>1</sup>H NMR spectrum of compound **10** in DMSO-*d*<sub>6</sub> (500 MHz).

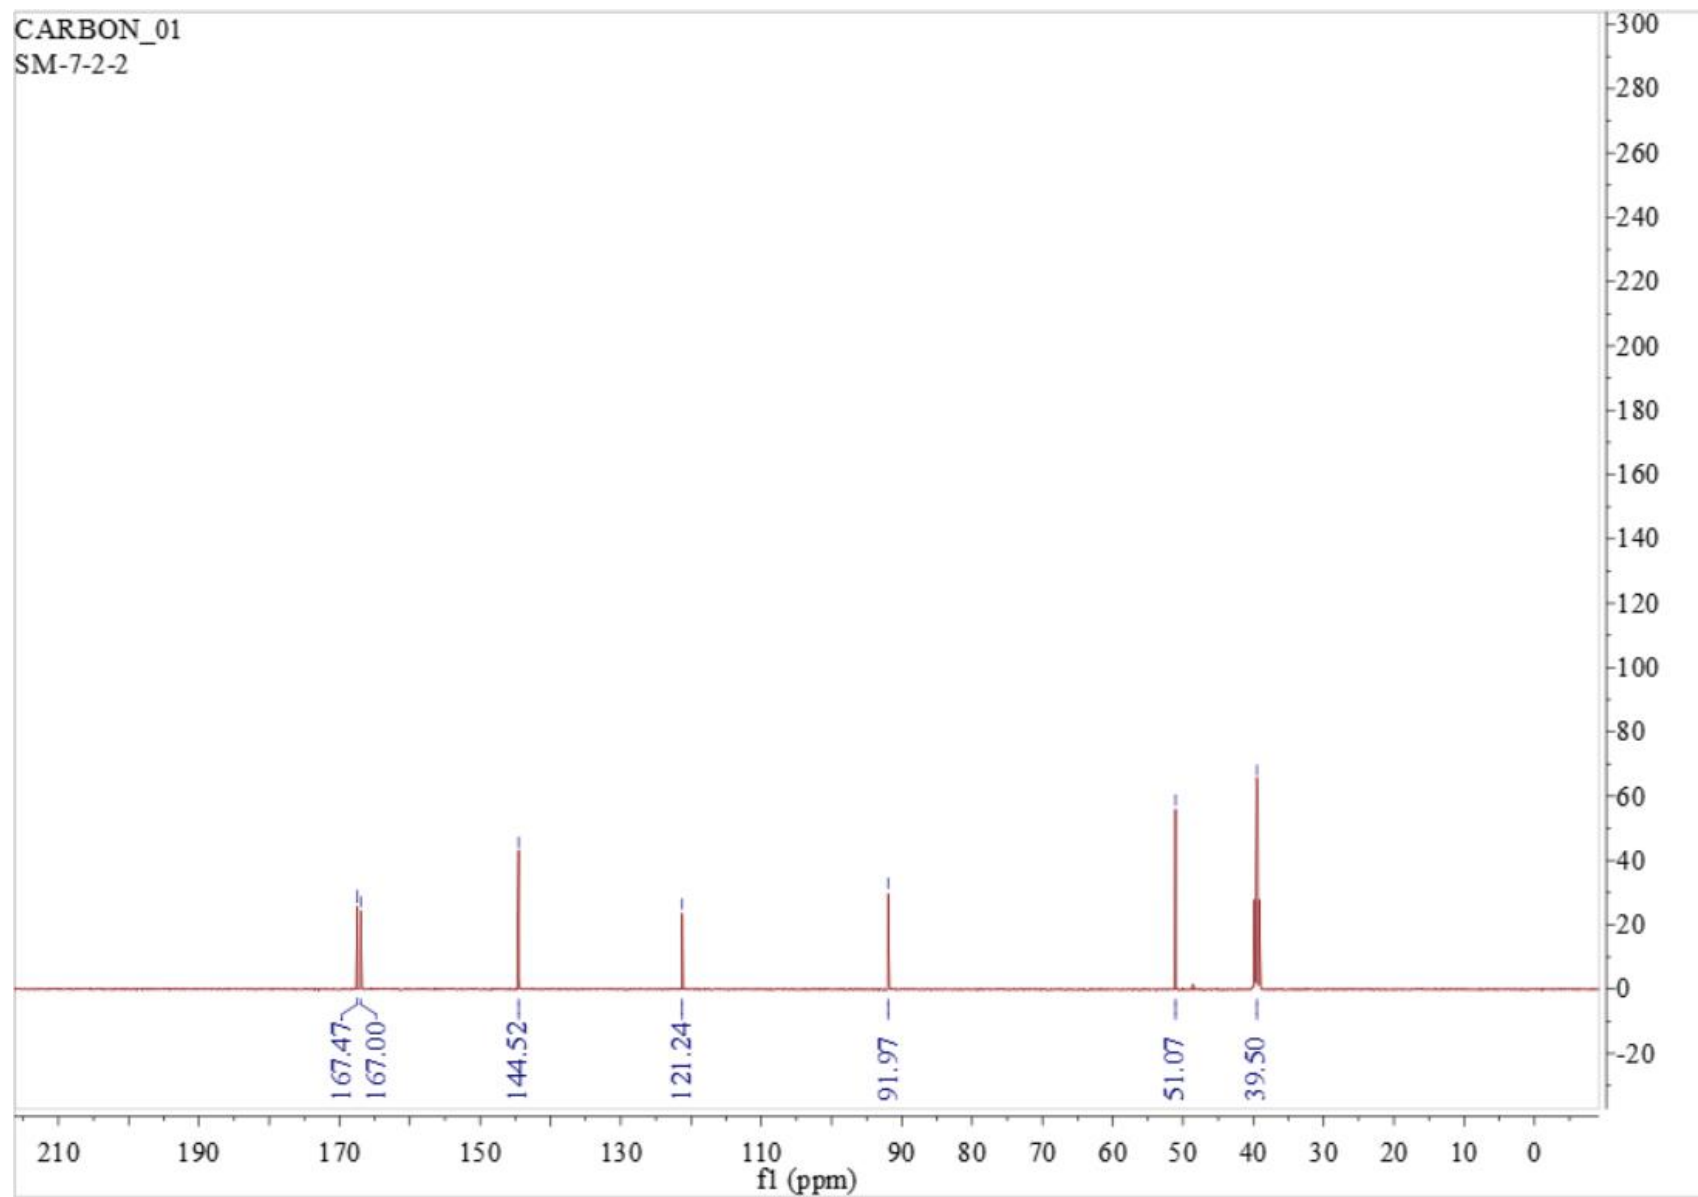

**Figure S90.**  $^{13}\text{C}$  NMR spectrum of compound **10** in  $\text{DMSO}-d_6$  (125 MHz).



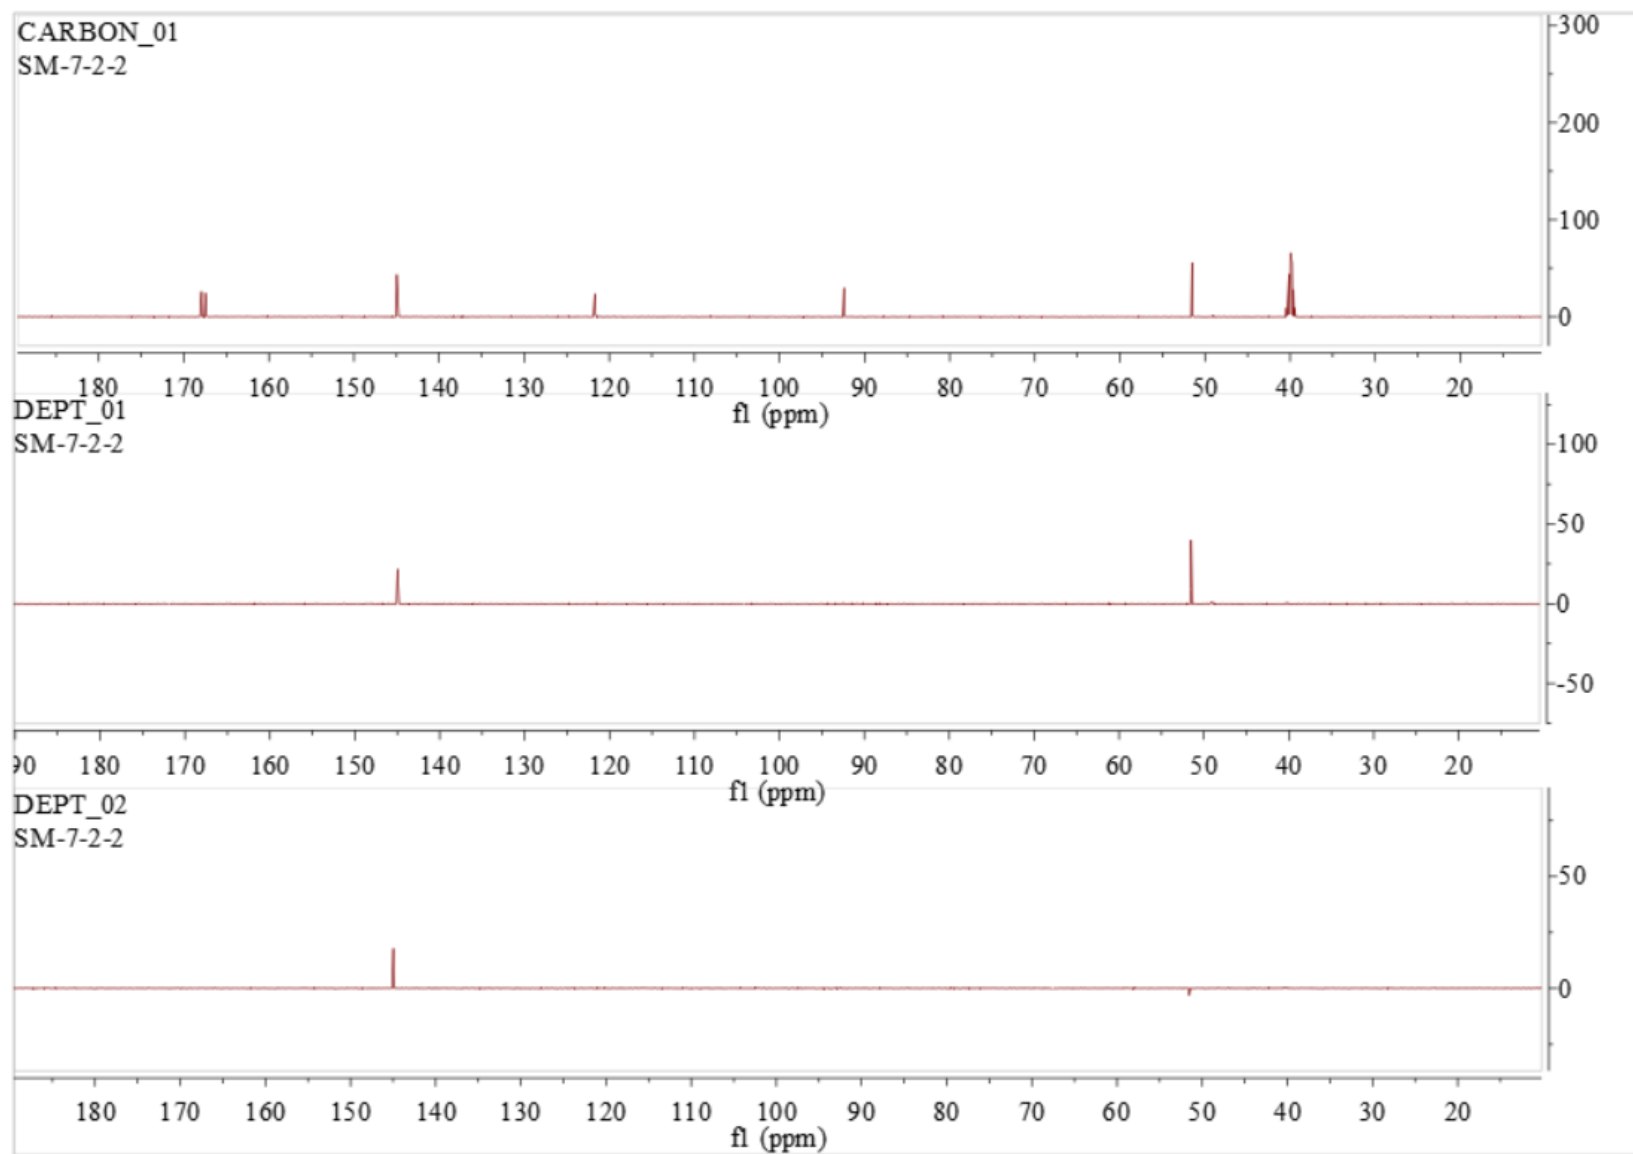

**Figure S91.**  $^{13}\text{C}$  NMR and DEPT spectrum of compound **10** in DMSO-*d*<sub>6</sub> (125 MHz).

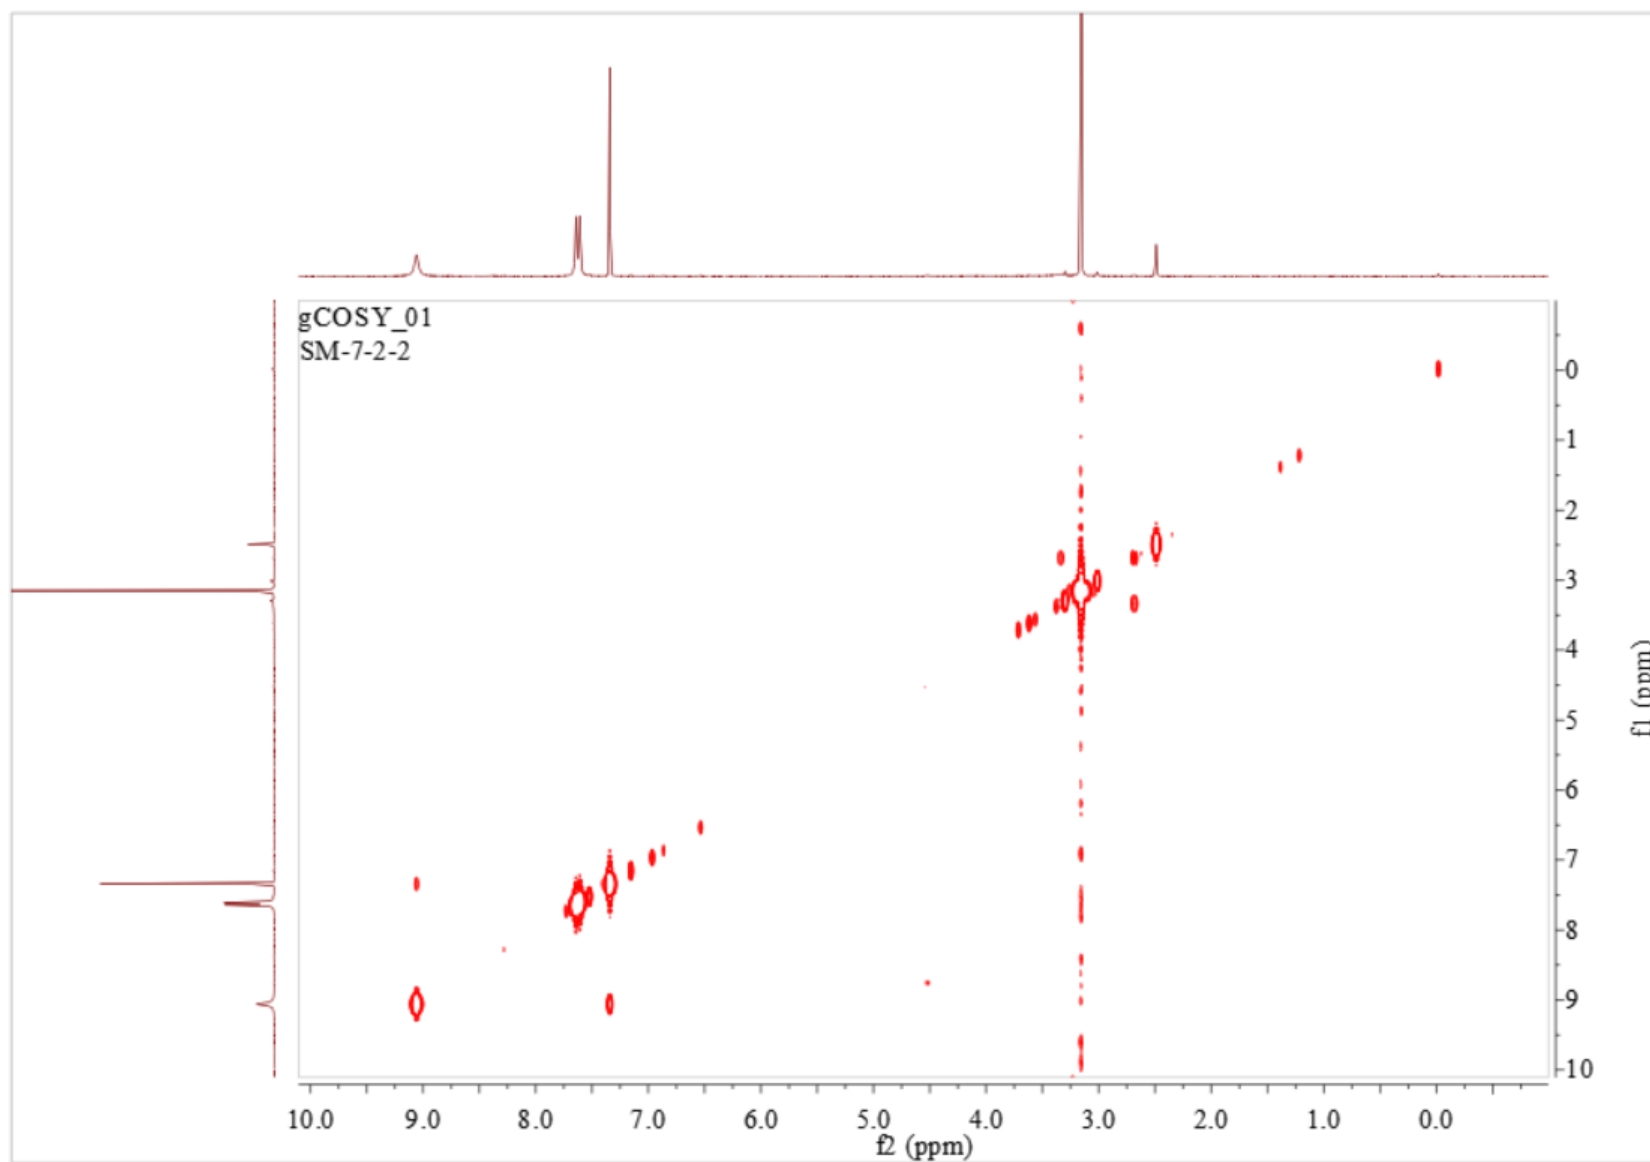

**Figure S92.**  $^1\text{H}$ - $^1\text{H}$  COSY spectrum of compound **10** in  $\text{DMSO-}d_6$  (500 MHz).

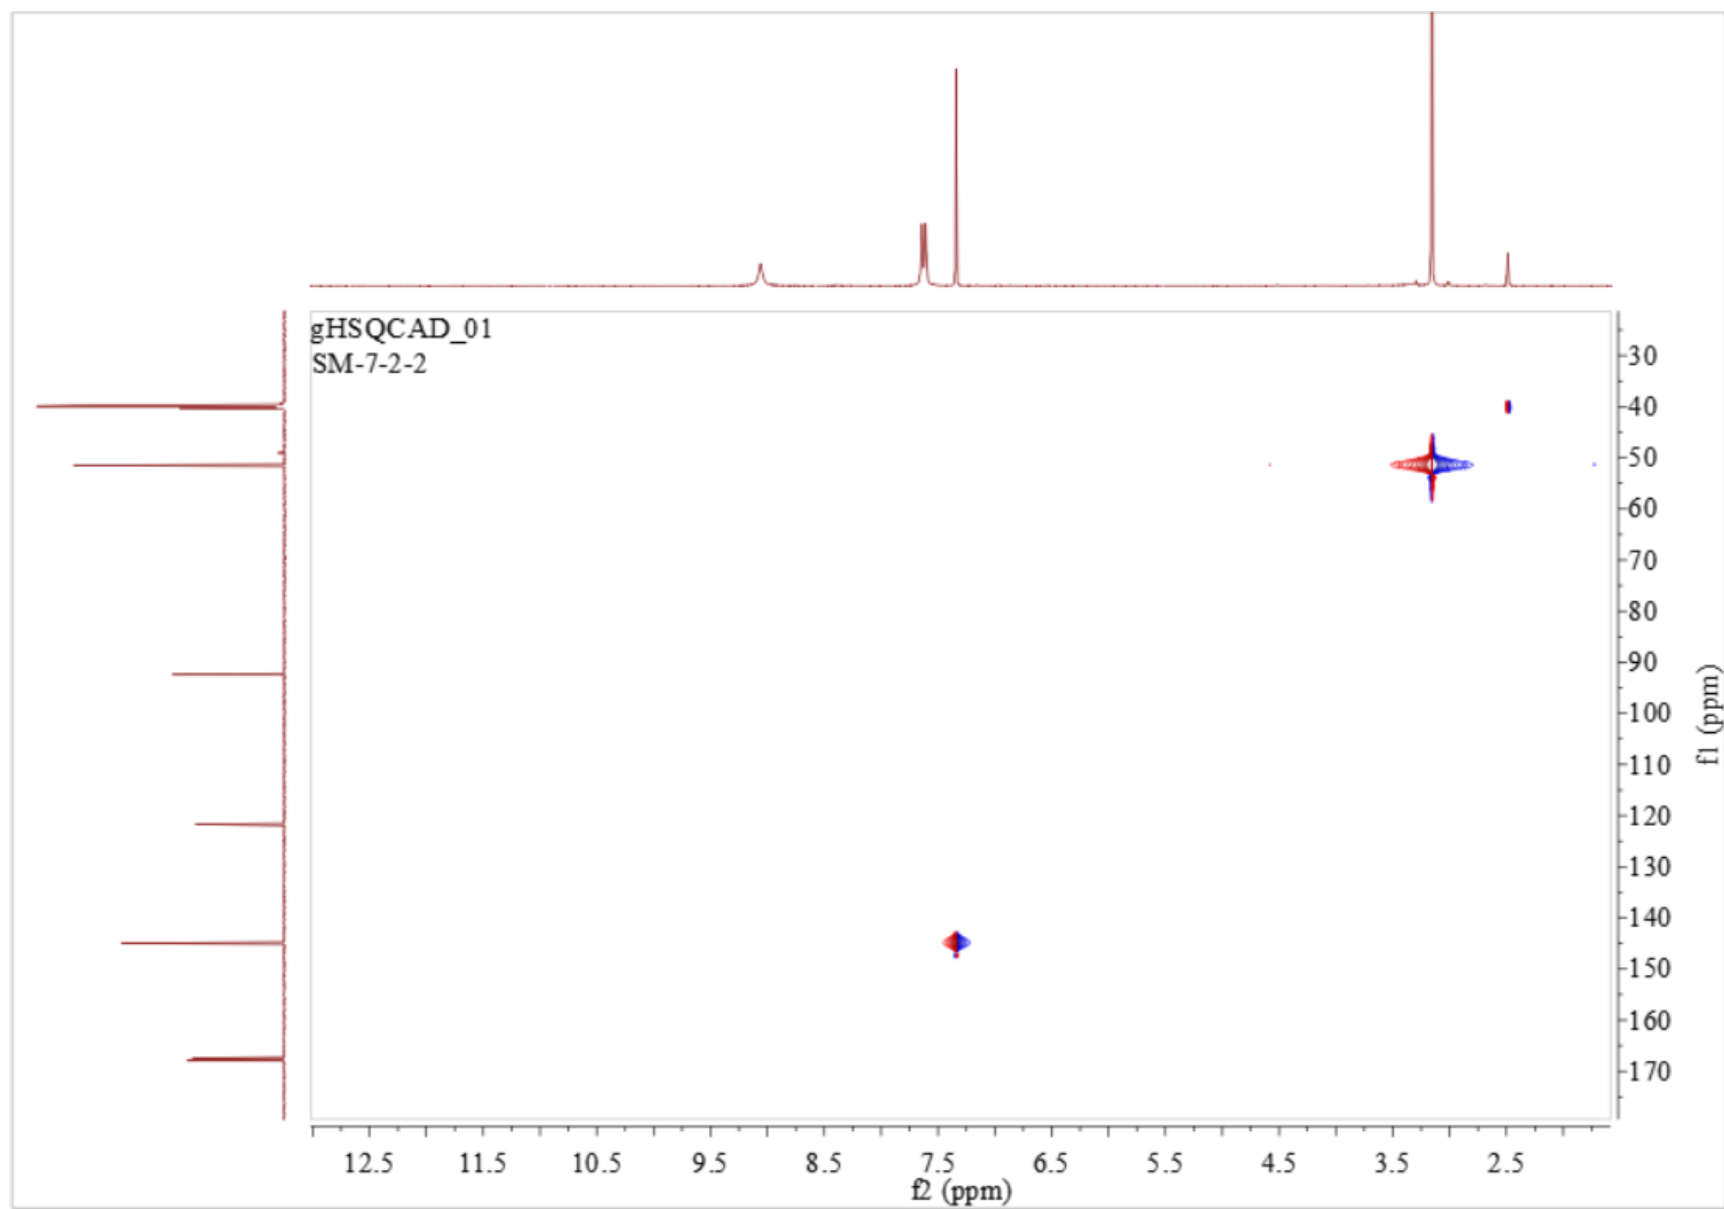

**Figure S93.** HSQC spectrum of compound **10** in DMSO- $d_6$  (500 MHz).

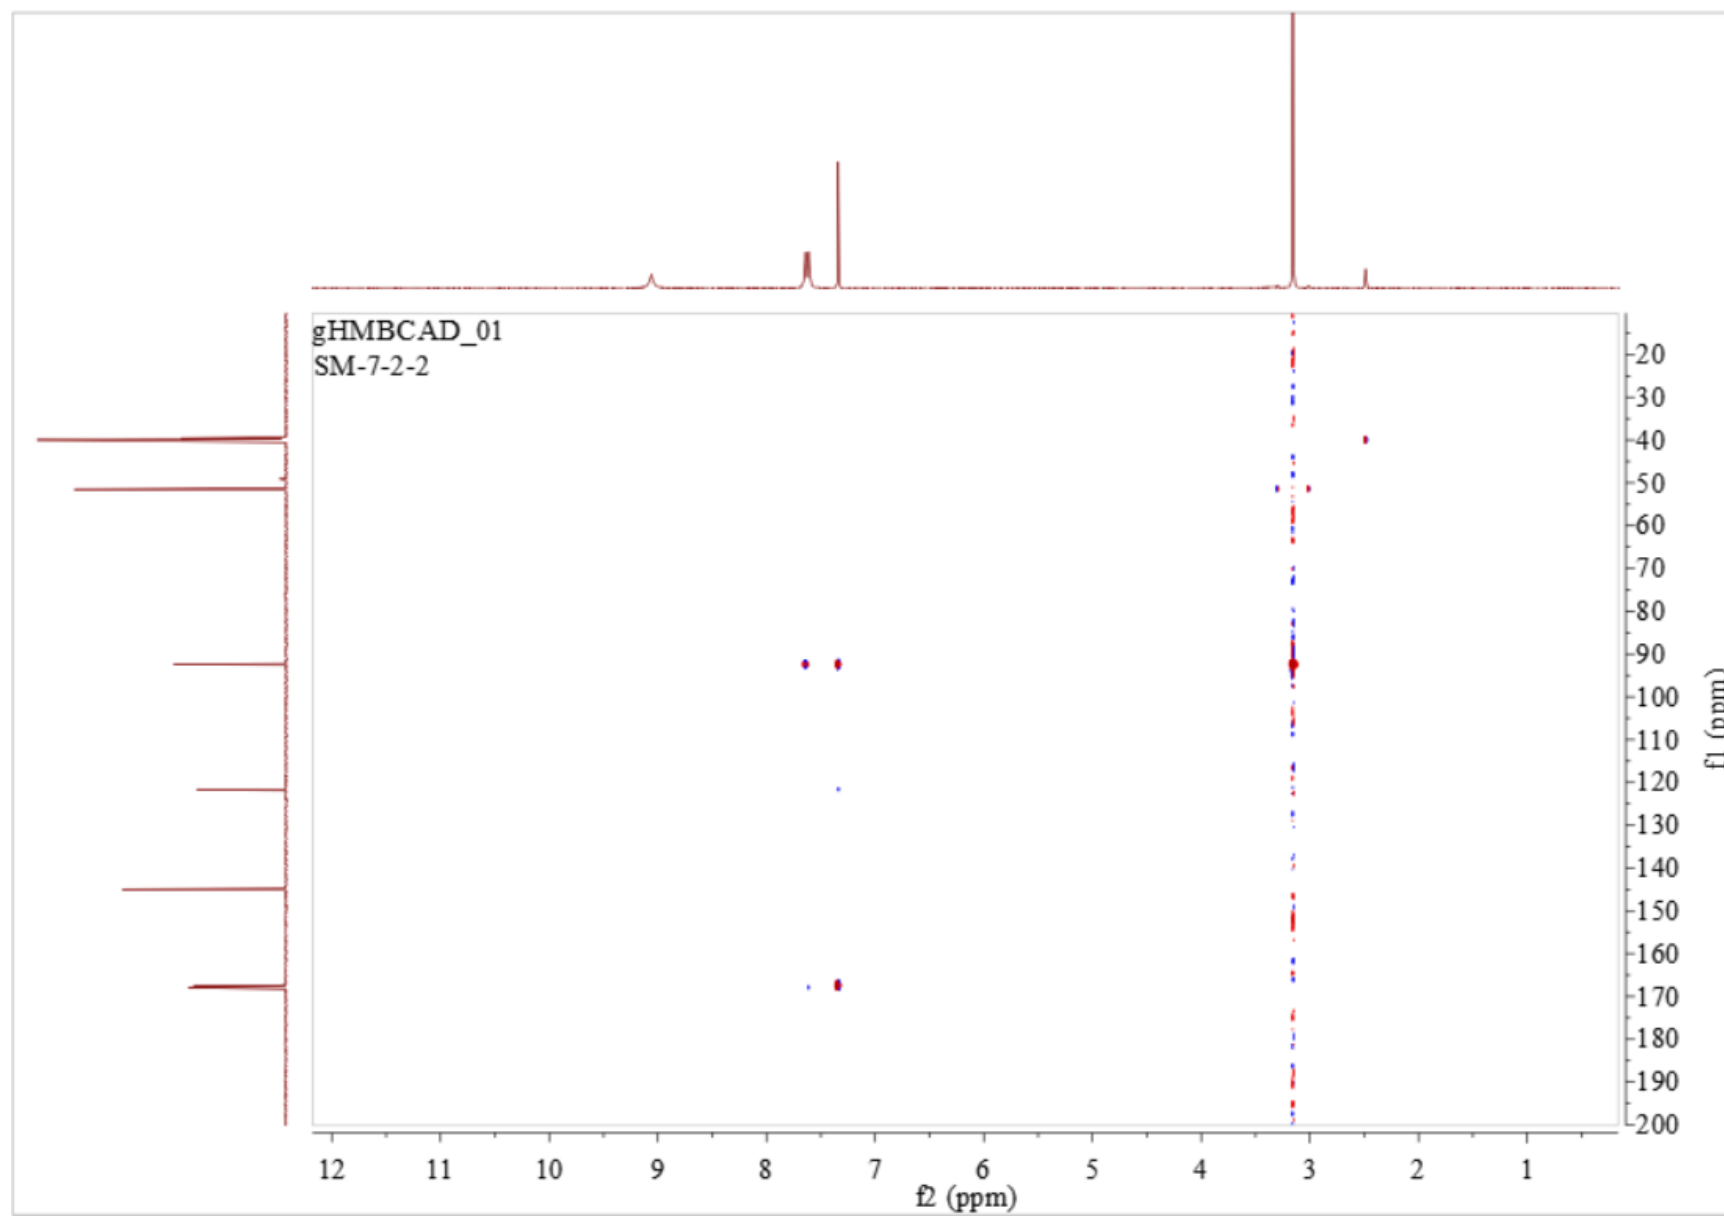

**Figure S94.** HMBC spectrum of compound **10** in DMSO- $d_6$  (500 MHz).

20210520-SM-7-2-2\_210520105231 #31 RT: 0.27 AV: 1 NL: 1.37E6  
T: FTMS + p ESI sid=35.00 Full ms [120.00-1000.00]

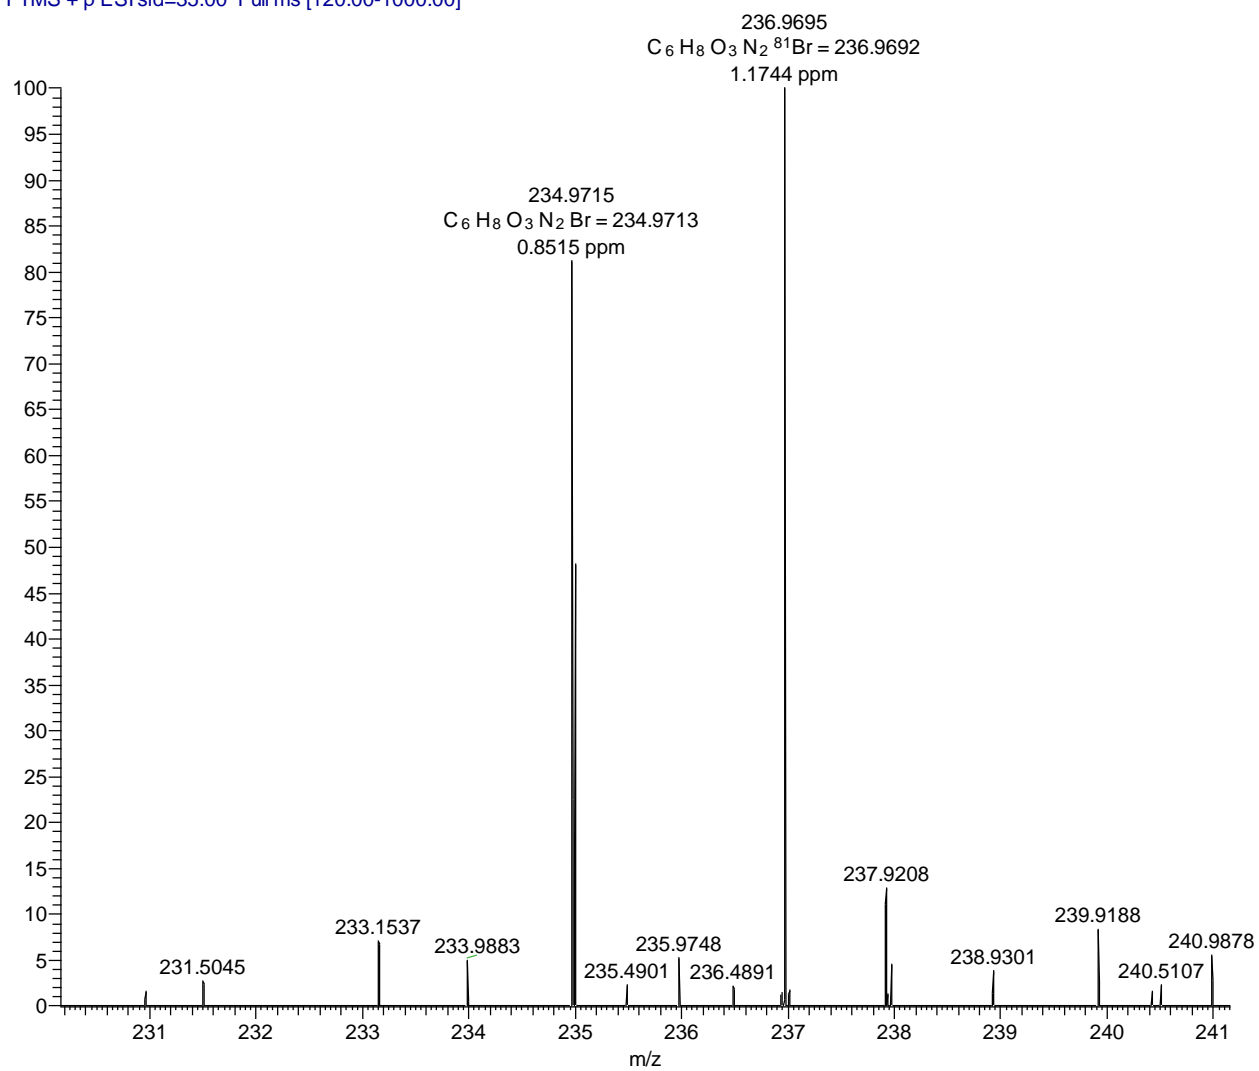

**Figure S95.** HRESIMS data of compound **10**.

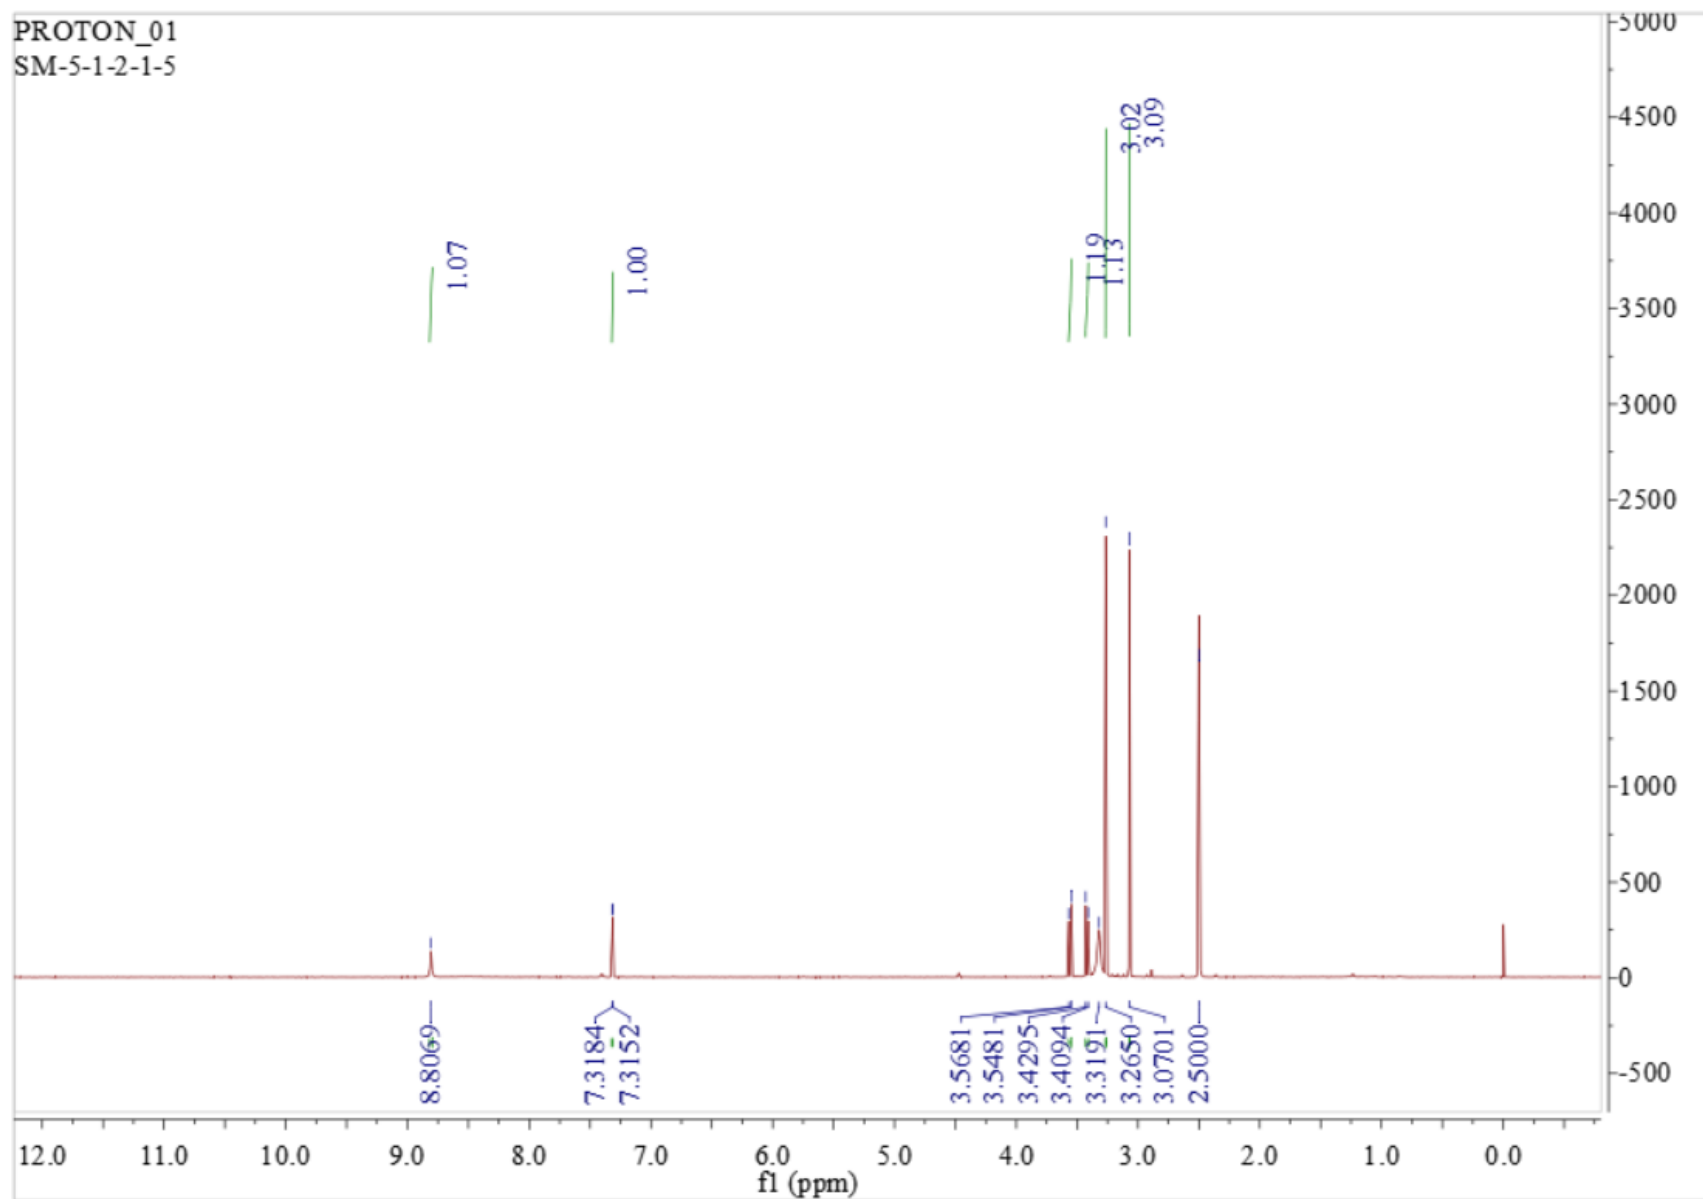

**Figure S96.**  $^1\text{H}$  NMR spectrum of compound **11** in  $\text{DMSO}-d_6$  (500 MHz).

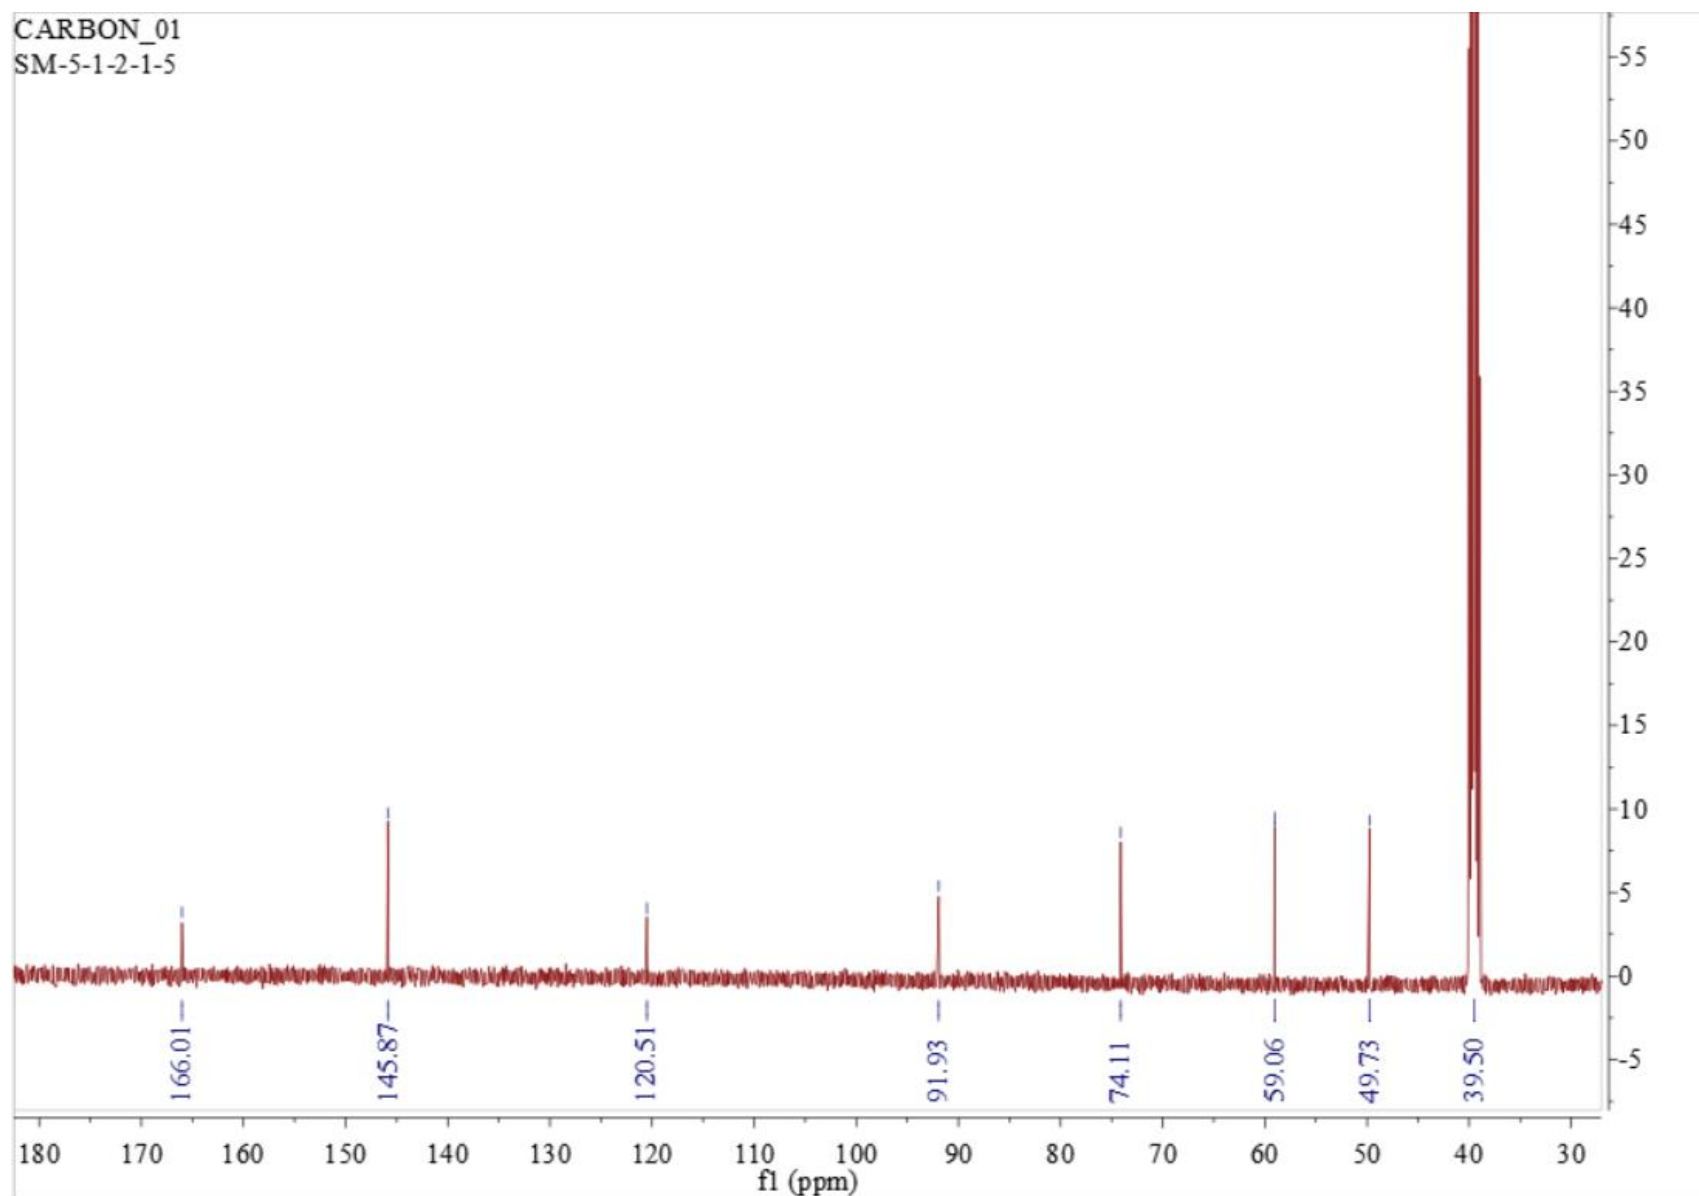

**Figure S97.**  $^{13}\text{C}$  NMR spectrum of compound **11** in  $\text{DMSO}-d_6$  (125 MHz).

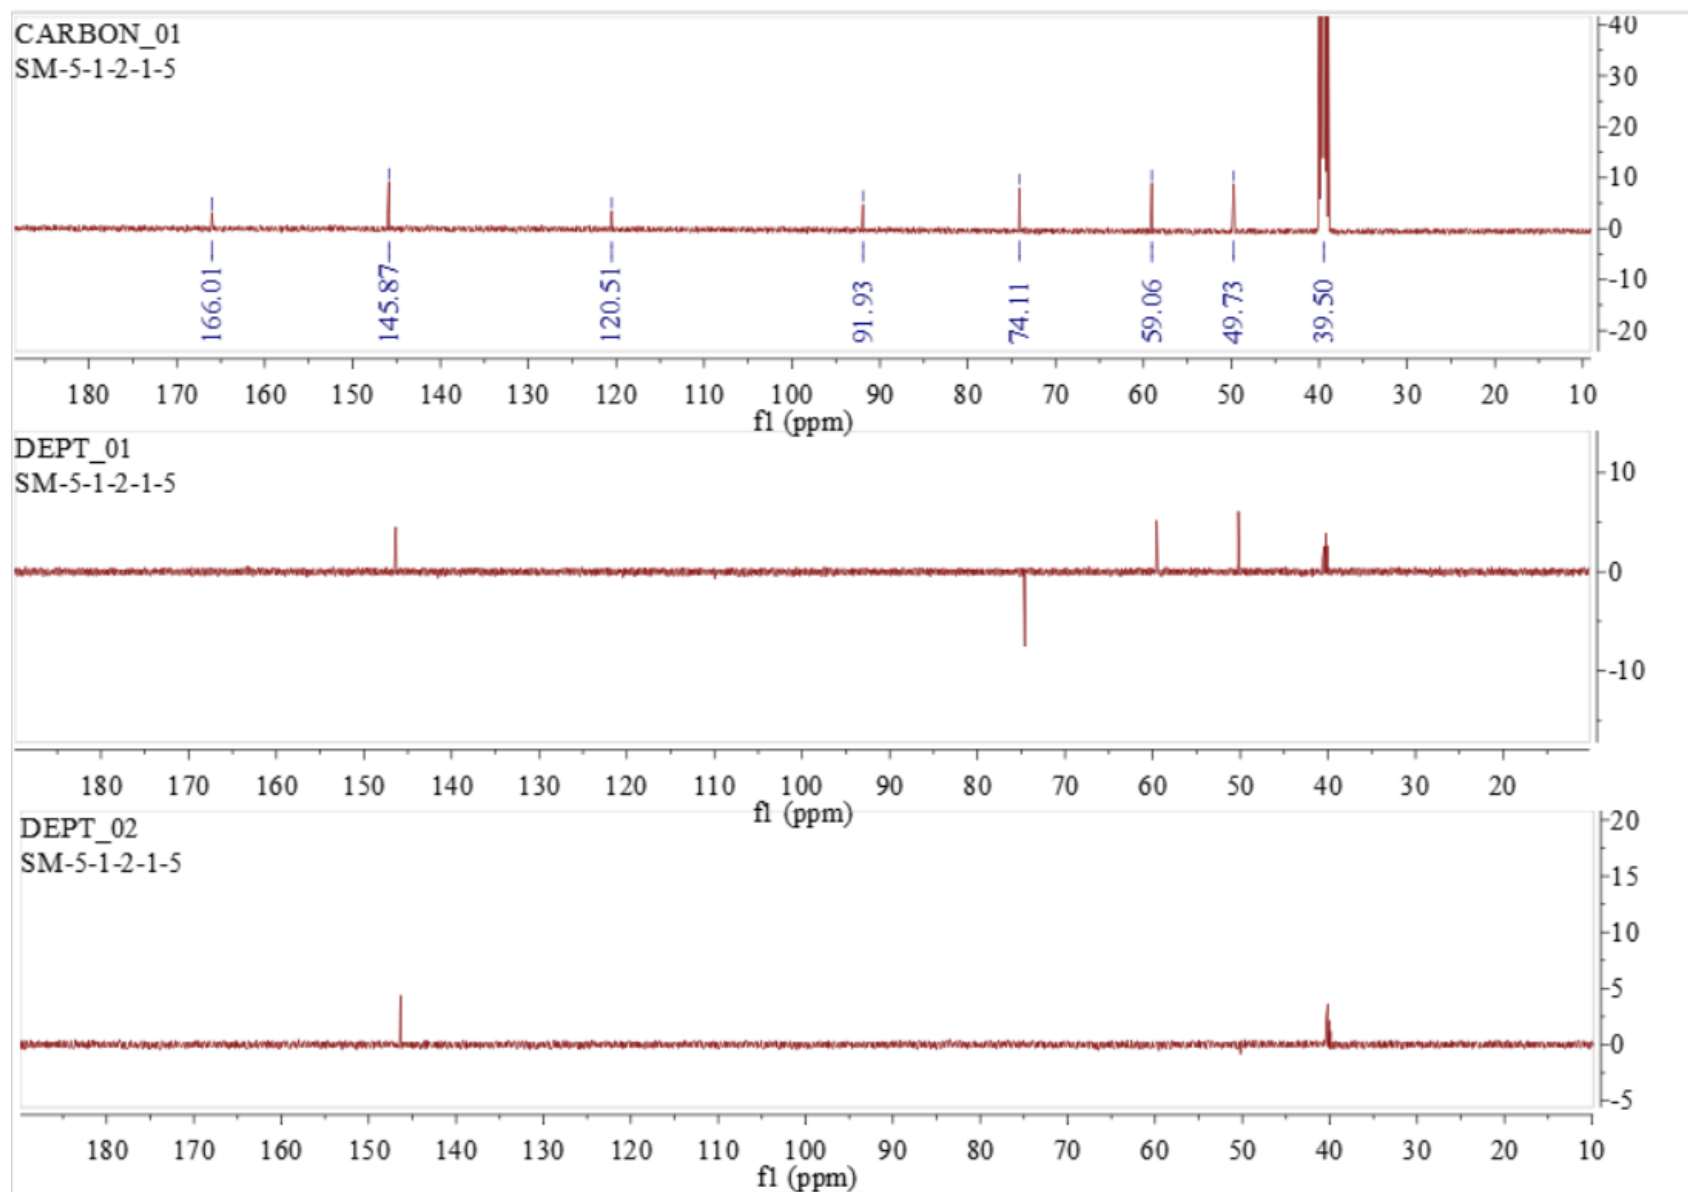

**Figure S98.** <sup>13</sup>C NMR and DEPT spectrum of compound **11** in DMSO-*d*<sub>6</sub> (125 MHz).



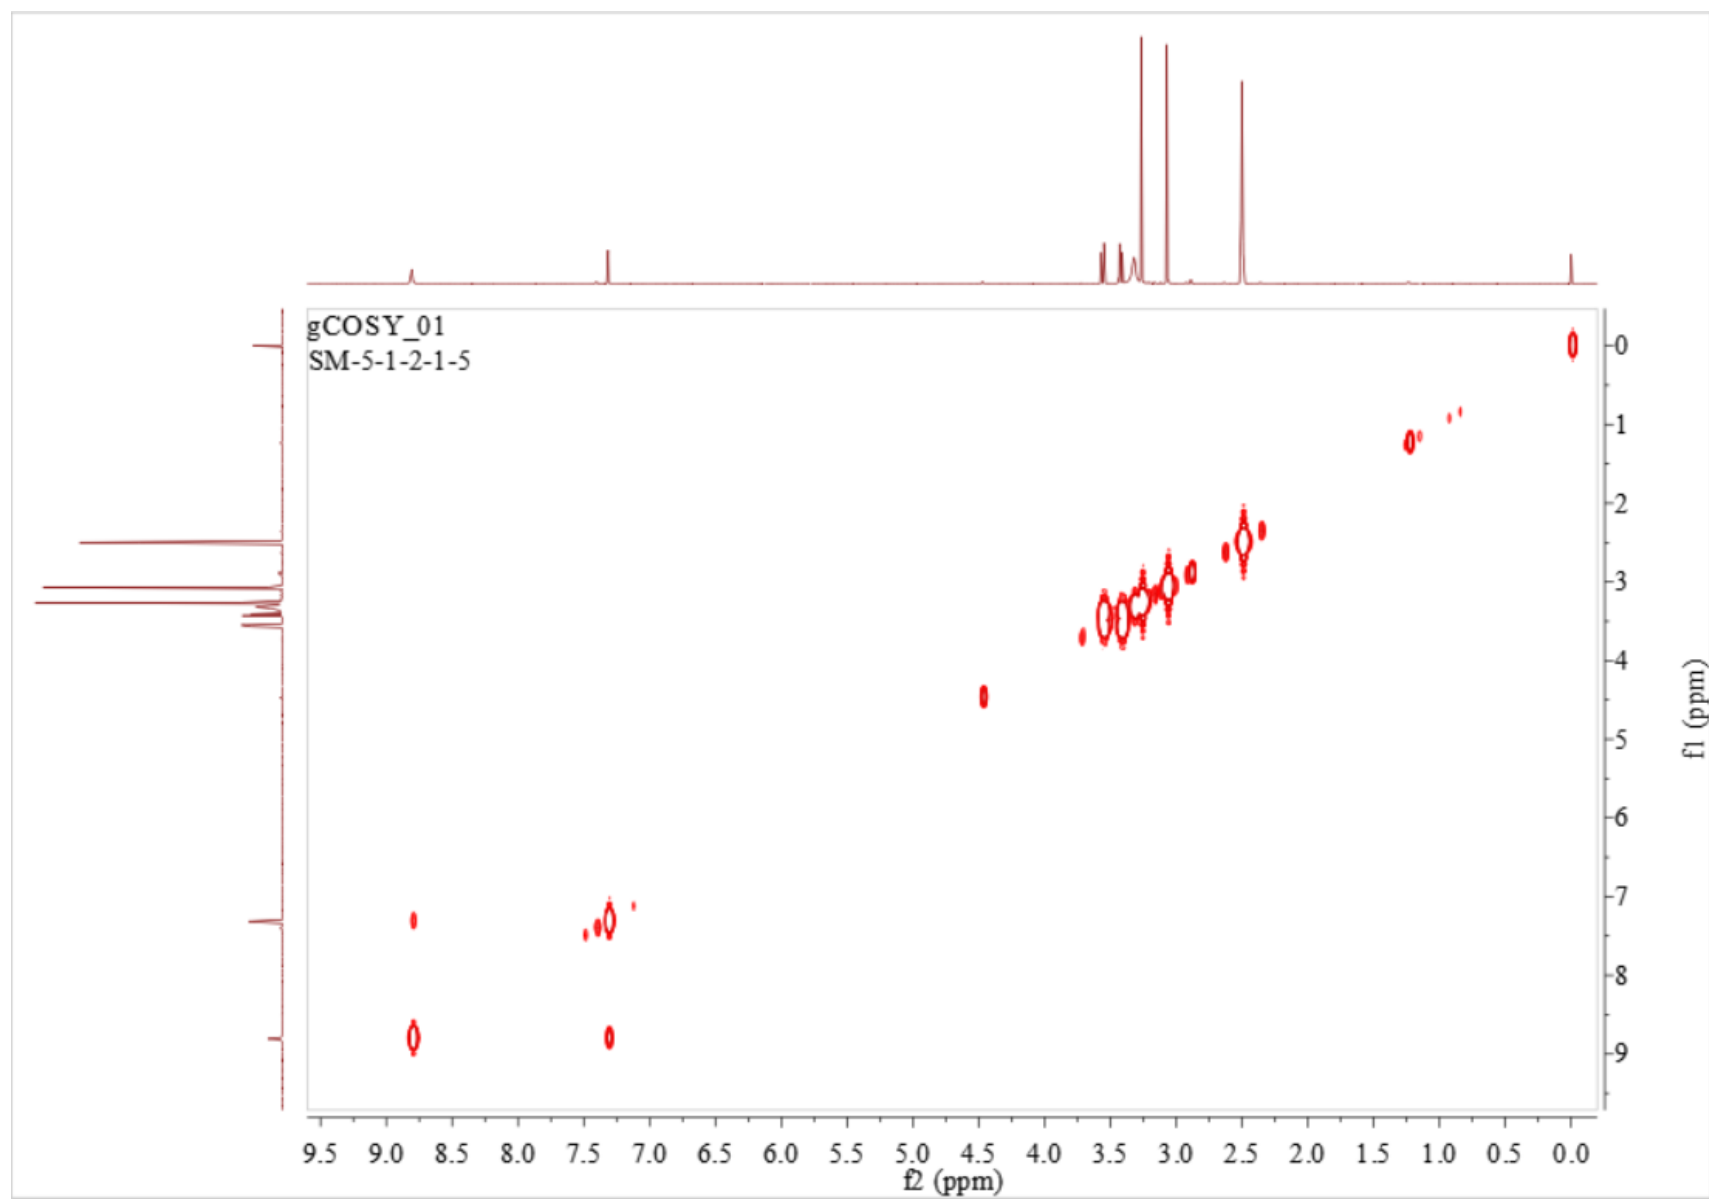

**Figure S99.**  $^1\text{H}$ - $^1\text{H}$  COSY spectrum of compound **11** in  $\text{DMSO}-d_6$  (500 MHz).

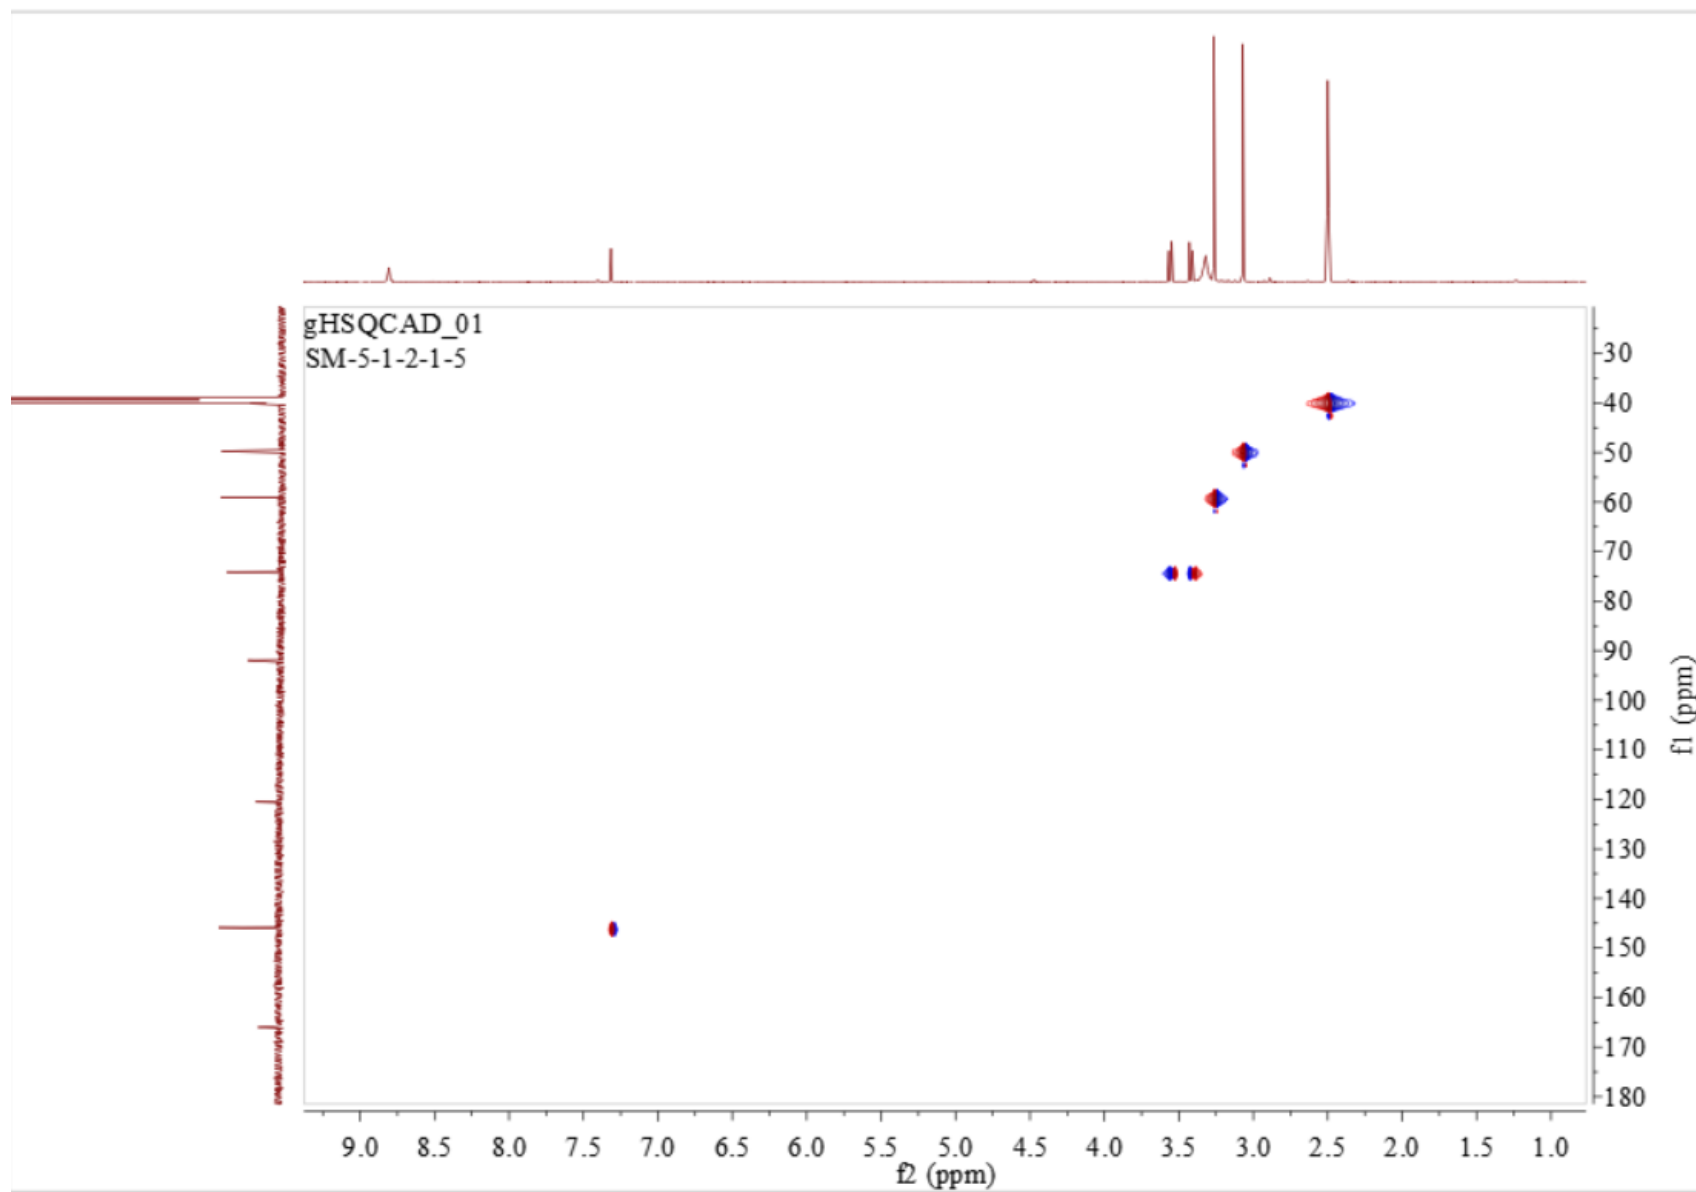

**Figure S100.** HSQC spectrum of compound **11** in DMSO- $d_6$  (500 MHz).

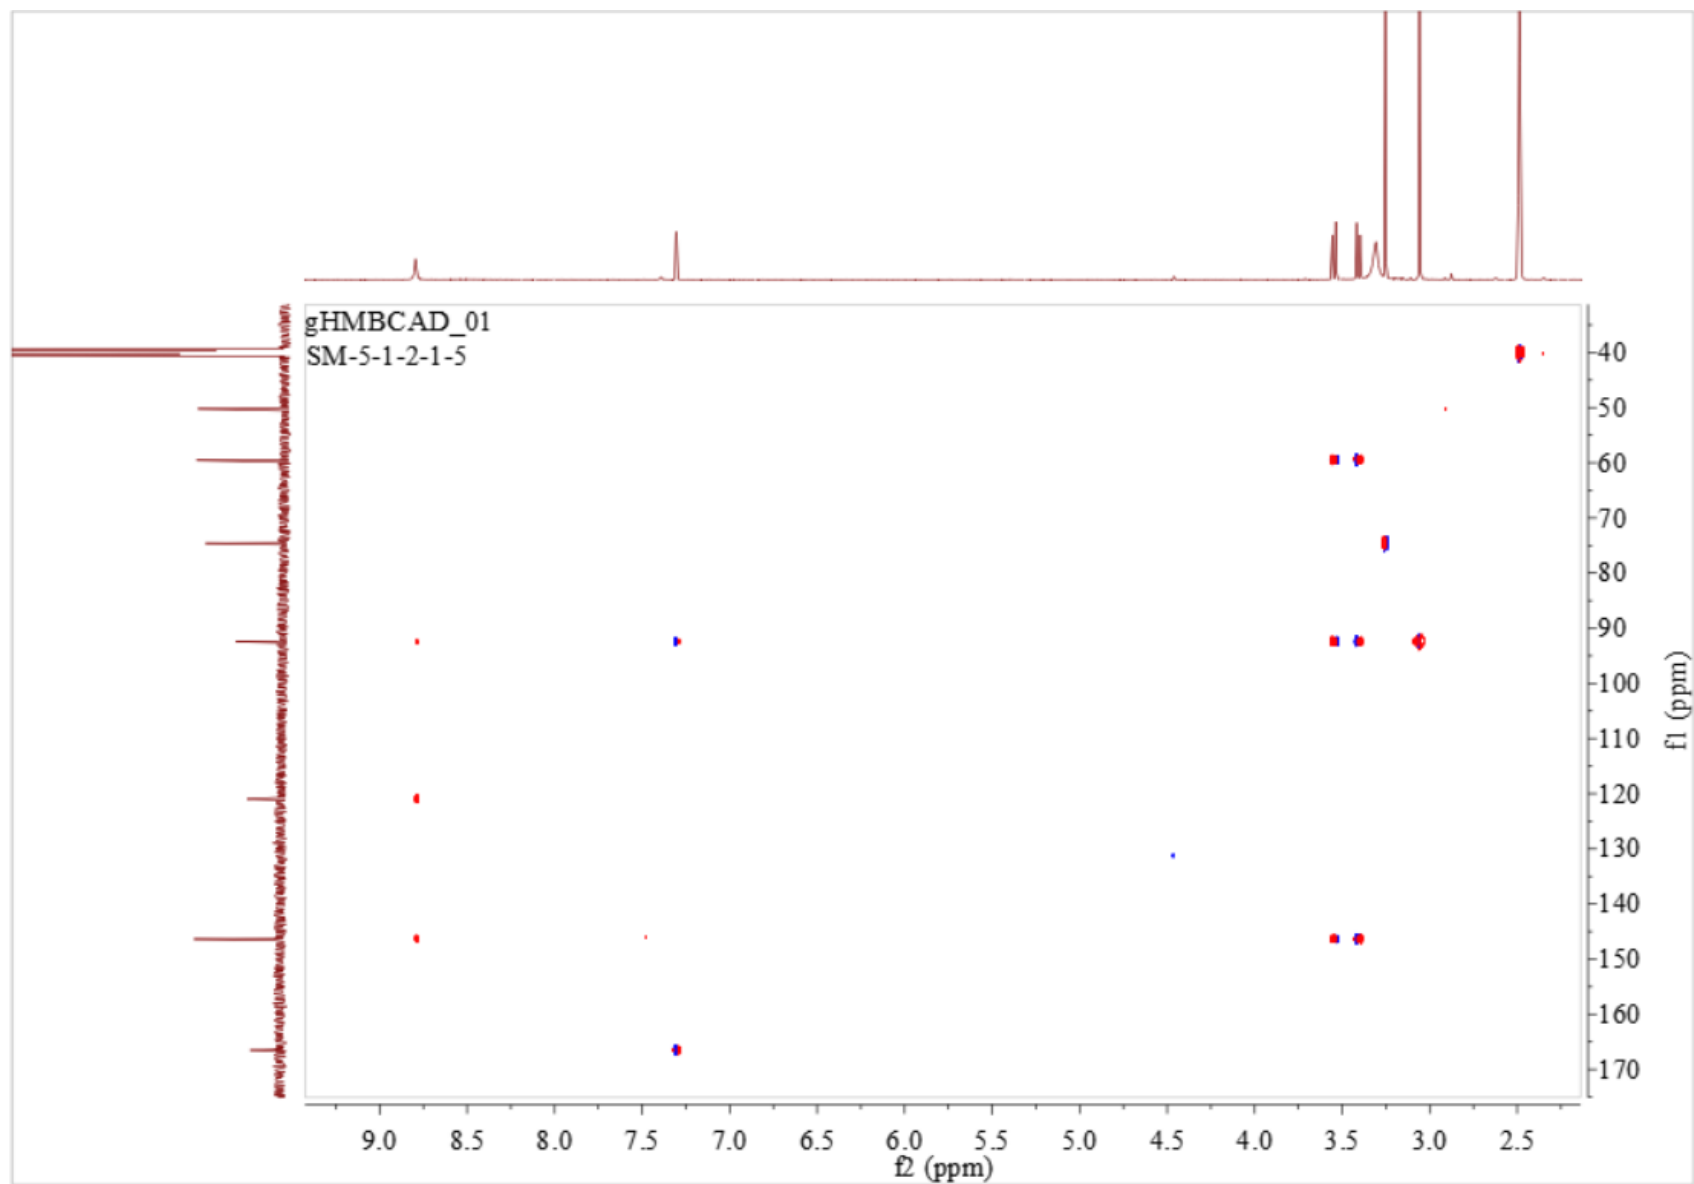

**Figure S101.** HMBC spectrum of compound **11** in DMSO- $d_6$  (500 MHz).

20210119-HG-5\_210118123729 #59-60 RT: 0.53-0.54 AV: 2 SB: 18 0.05-0.22 NL: 1.87E6  
T: FTMS + p ESI Full ms [100.00-1500.00]

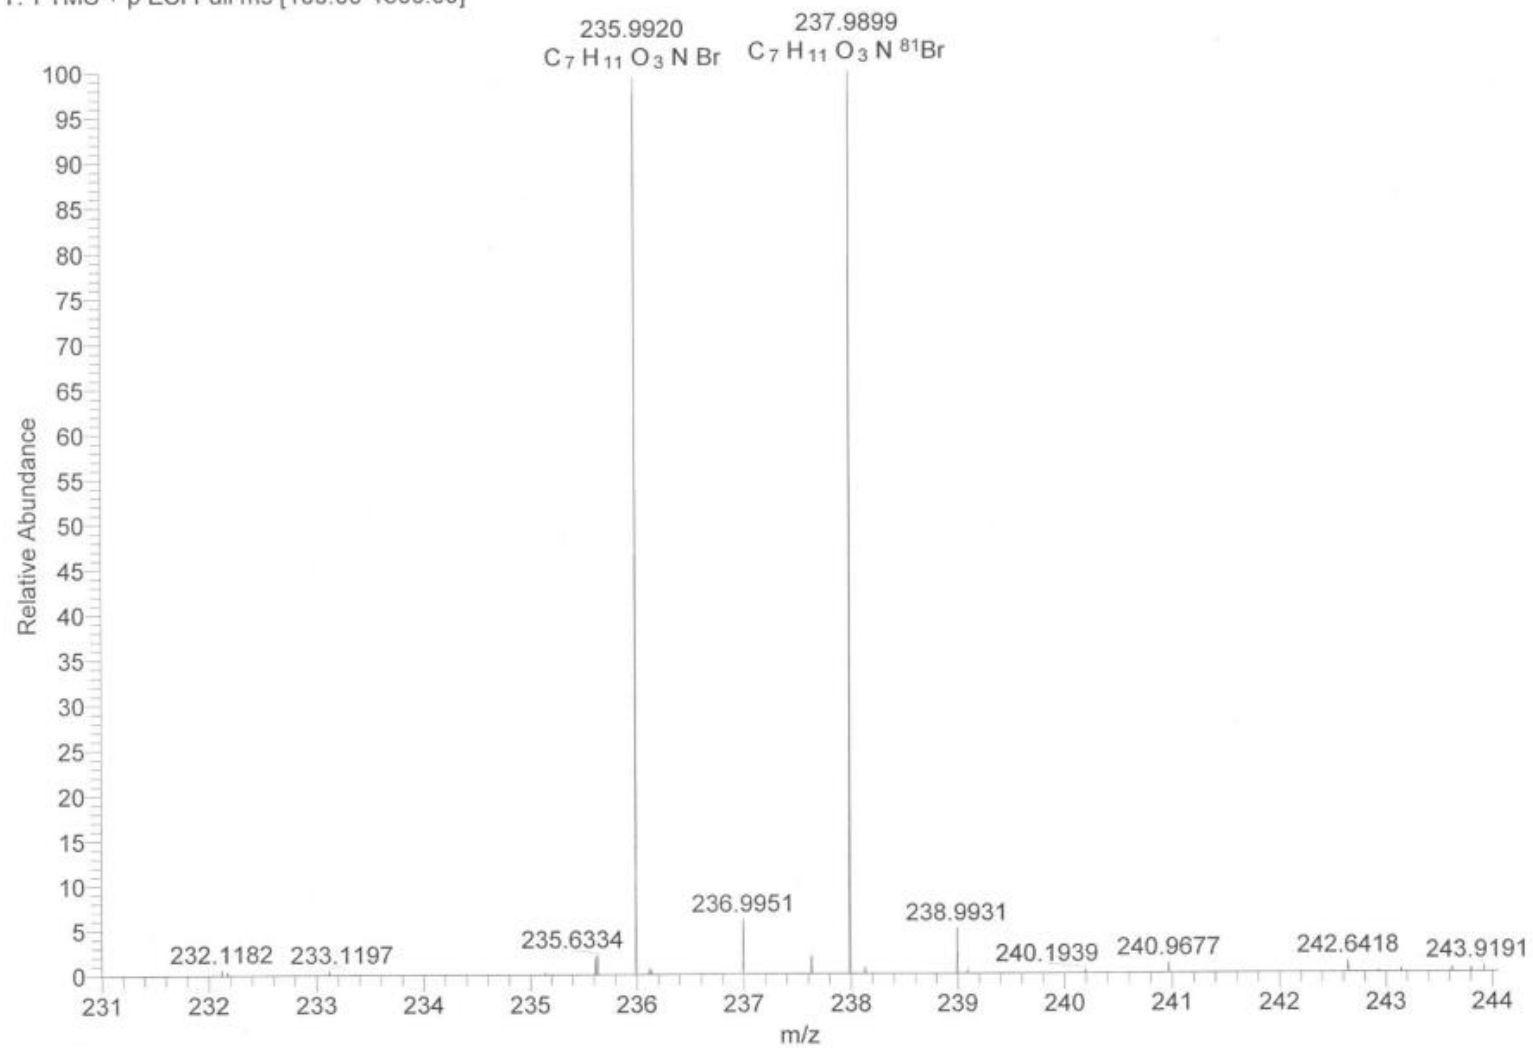

Figure S102. HRESIMS data of compound 11.

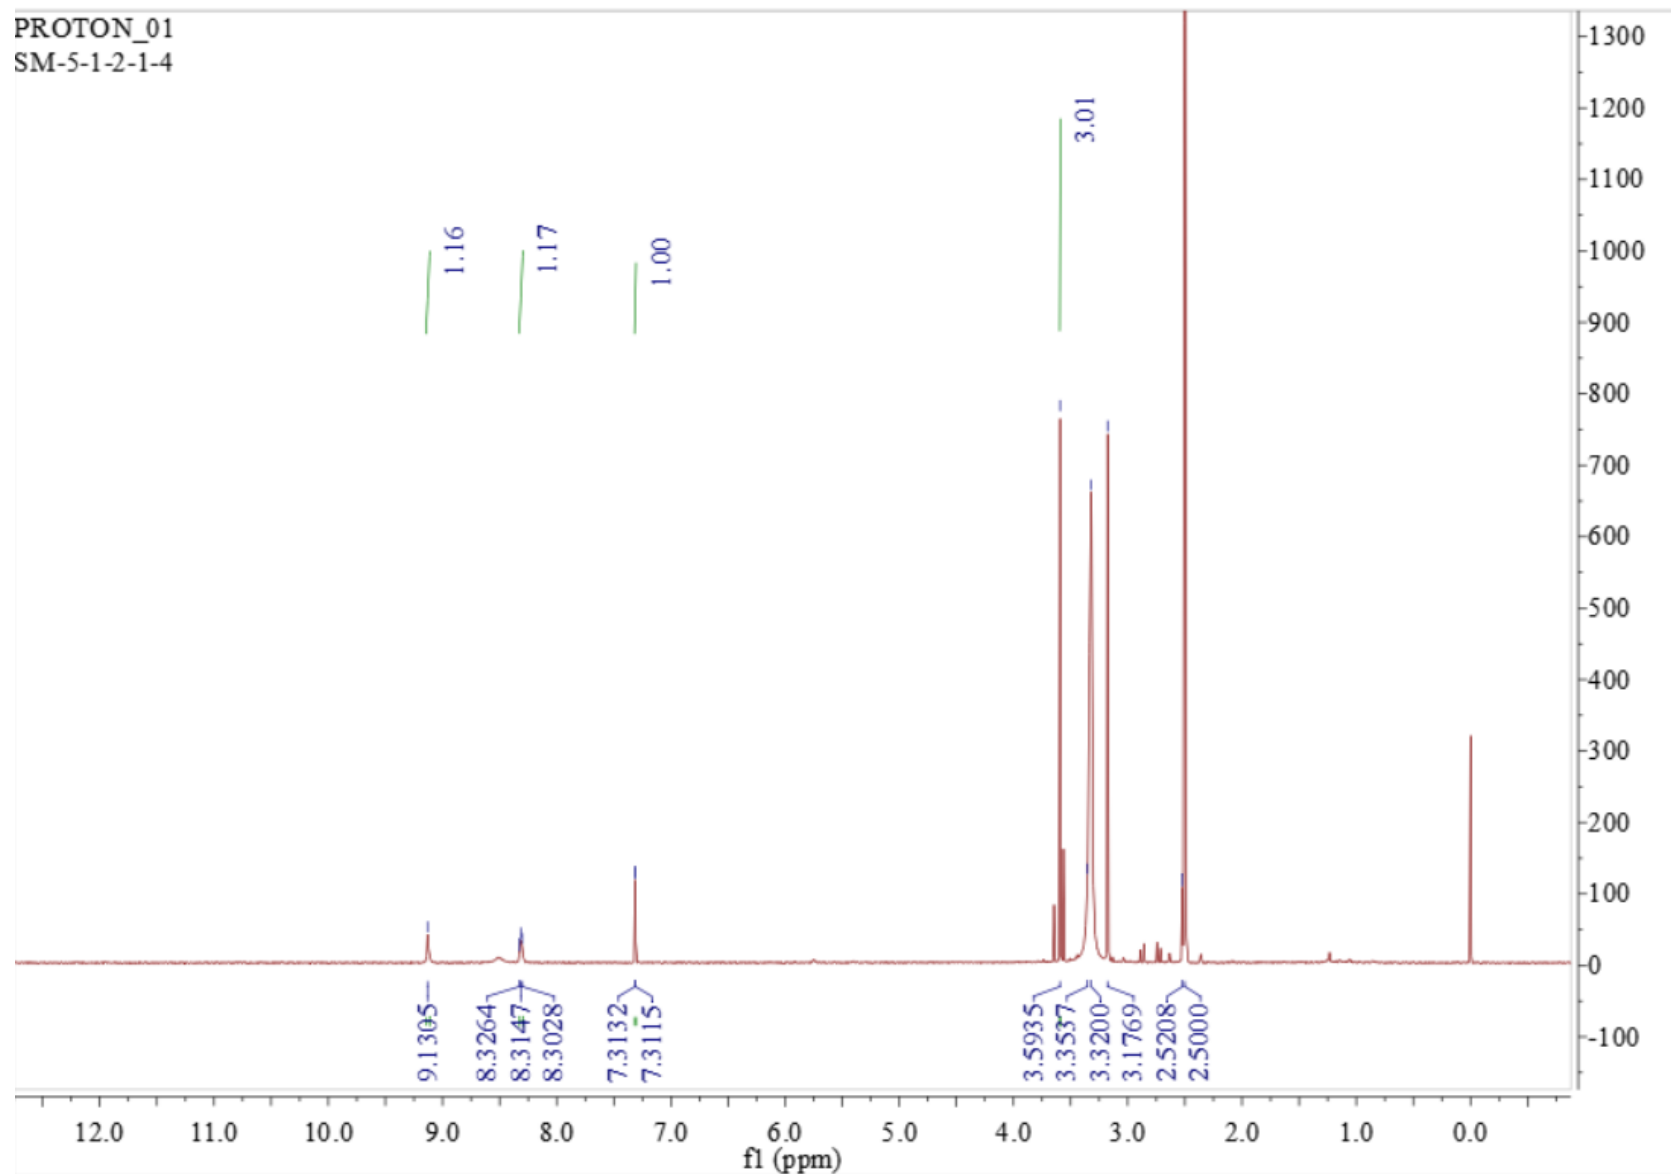

**Figure S103.**  $^1\text{H}$  NMR spectrum of compound **12** in  $\text{DMSO}-d_6$  (500 MHz).

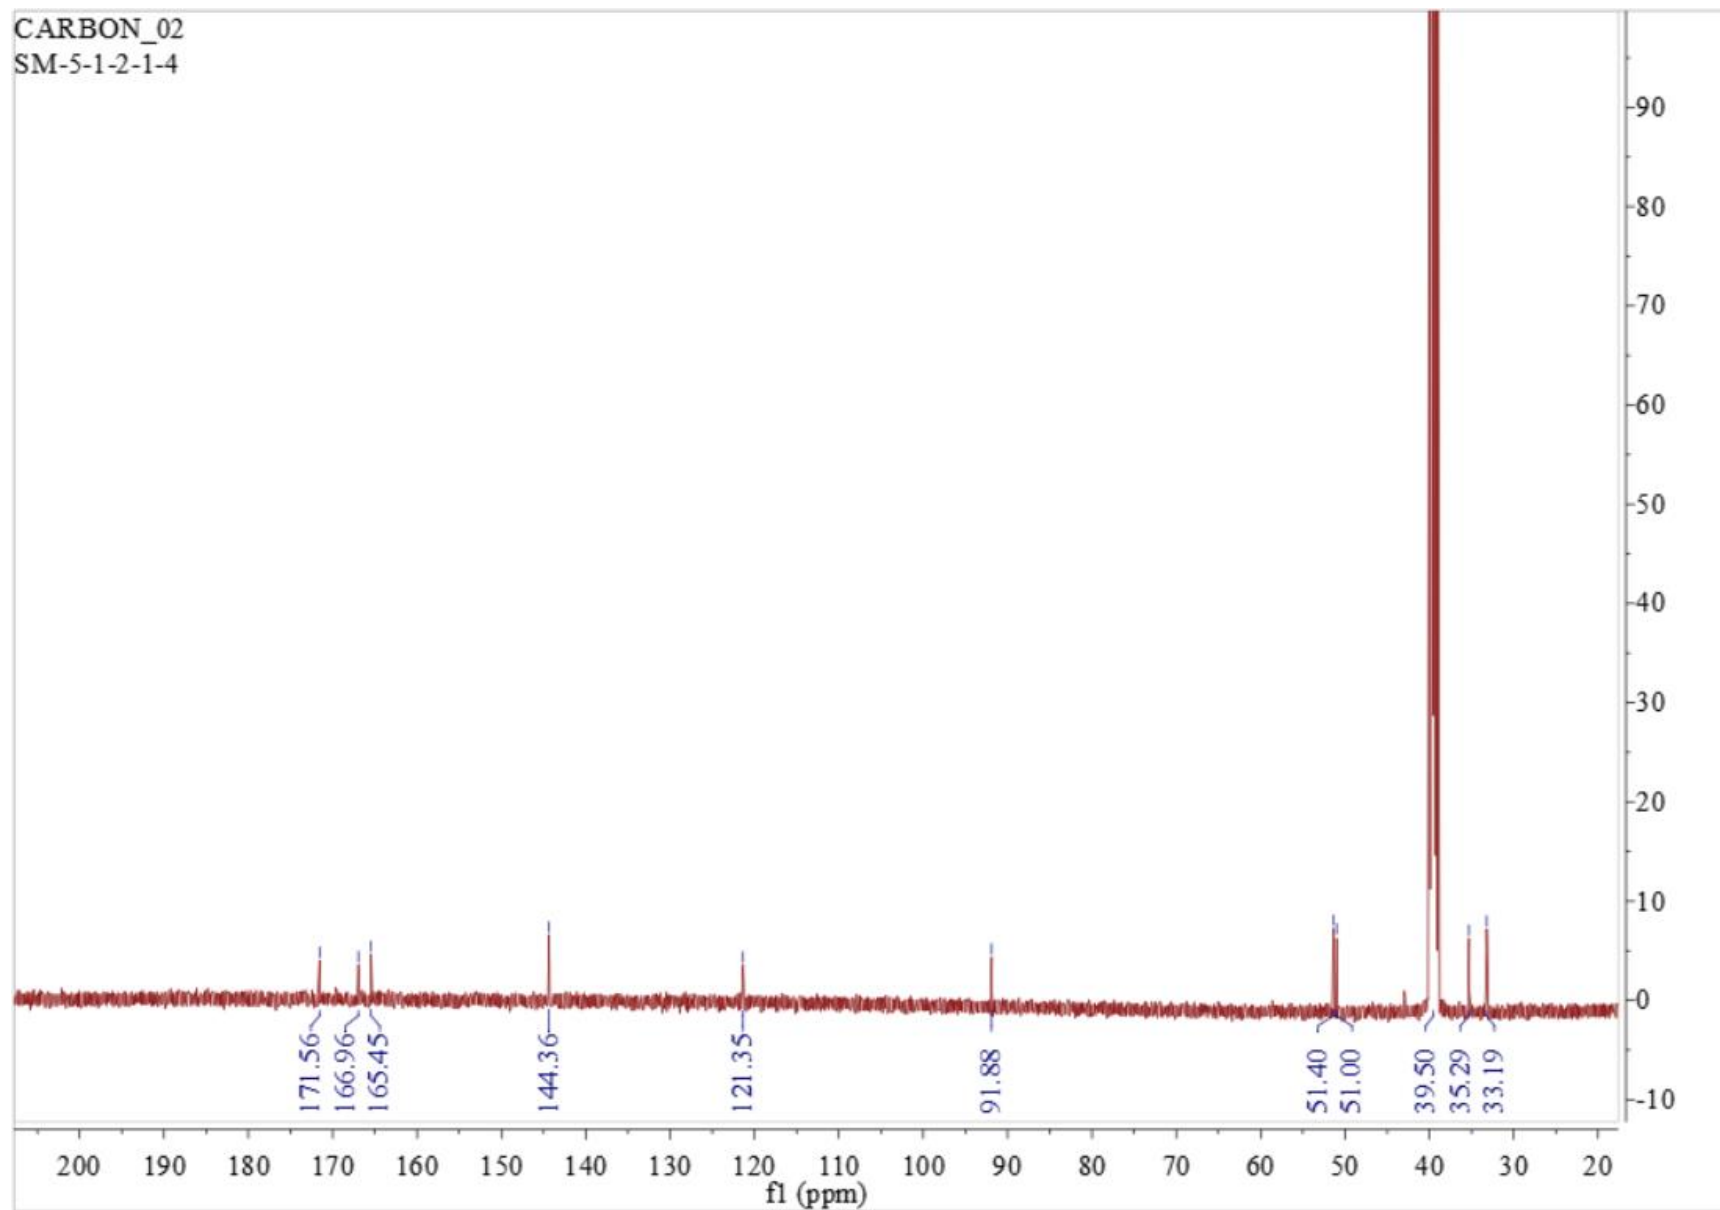

**Figure S104.**  $^{13}\text{C}$  NMR spectrum of compound **12** in  $\text{DMSO}-d_6$  (125 MHz).

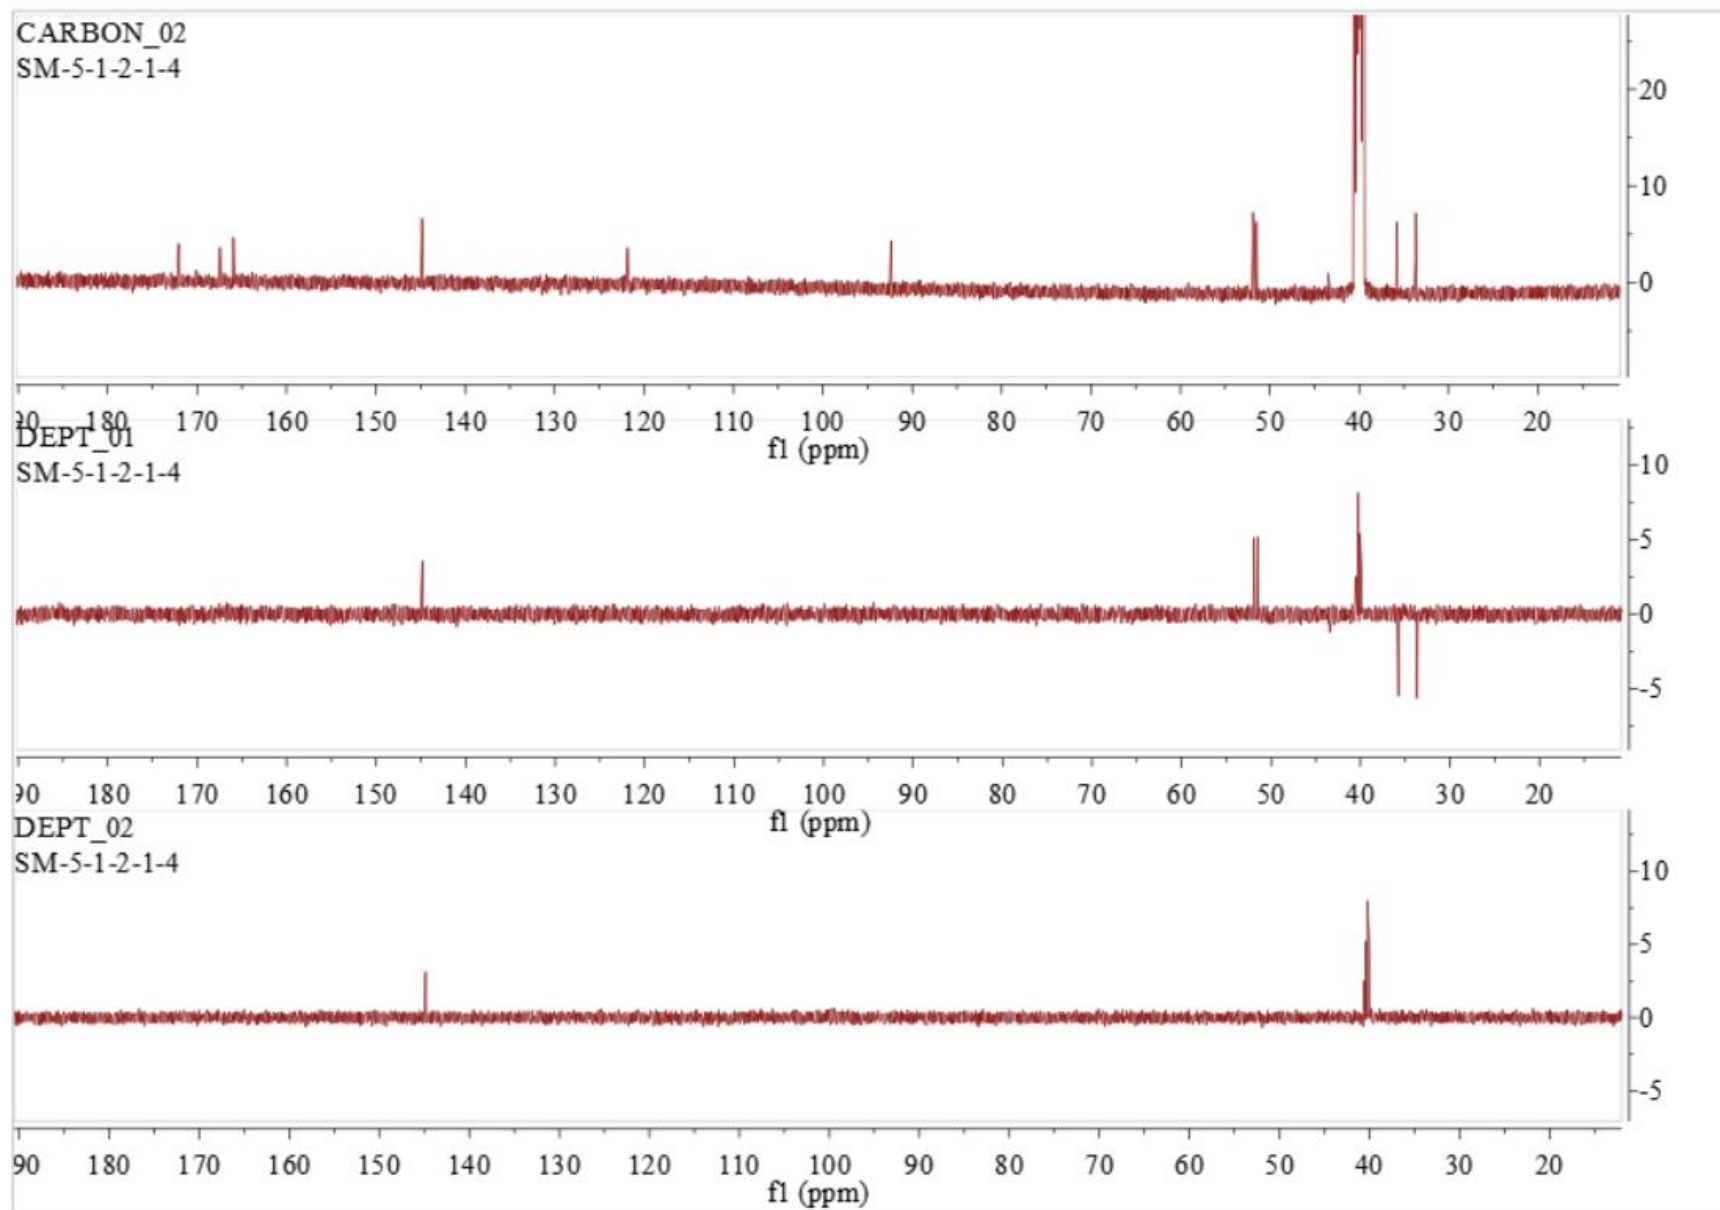

**Figure S105.** <sup>13</sup>C NMR and DEPT spectrum of compound **12** in DMSO-*d*<sub>6</sub> (125 MHz).

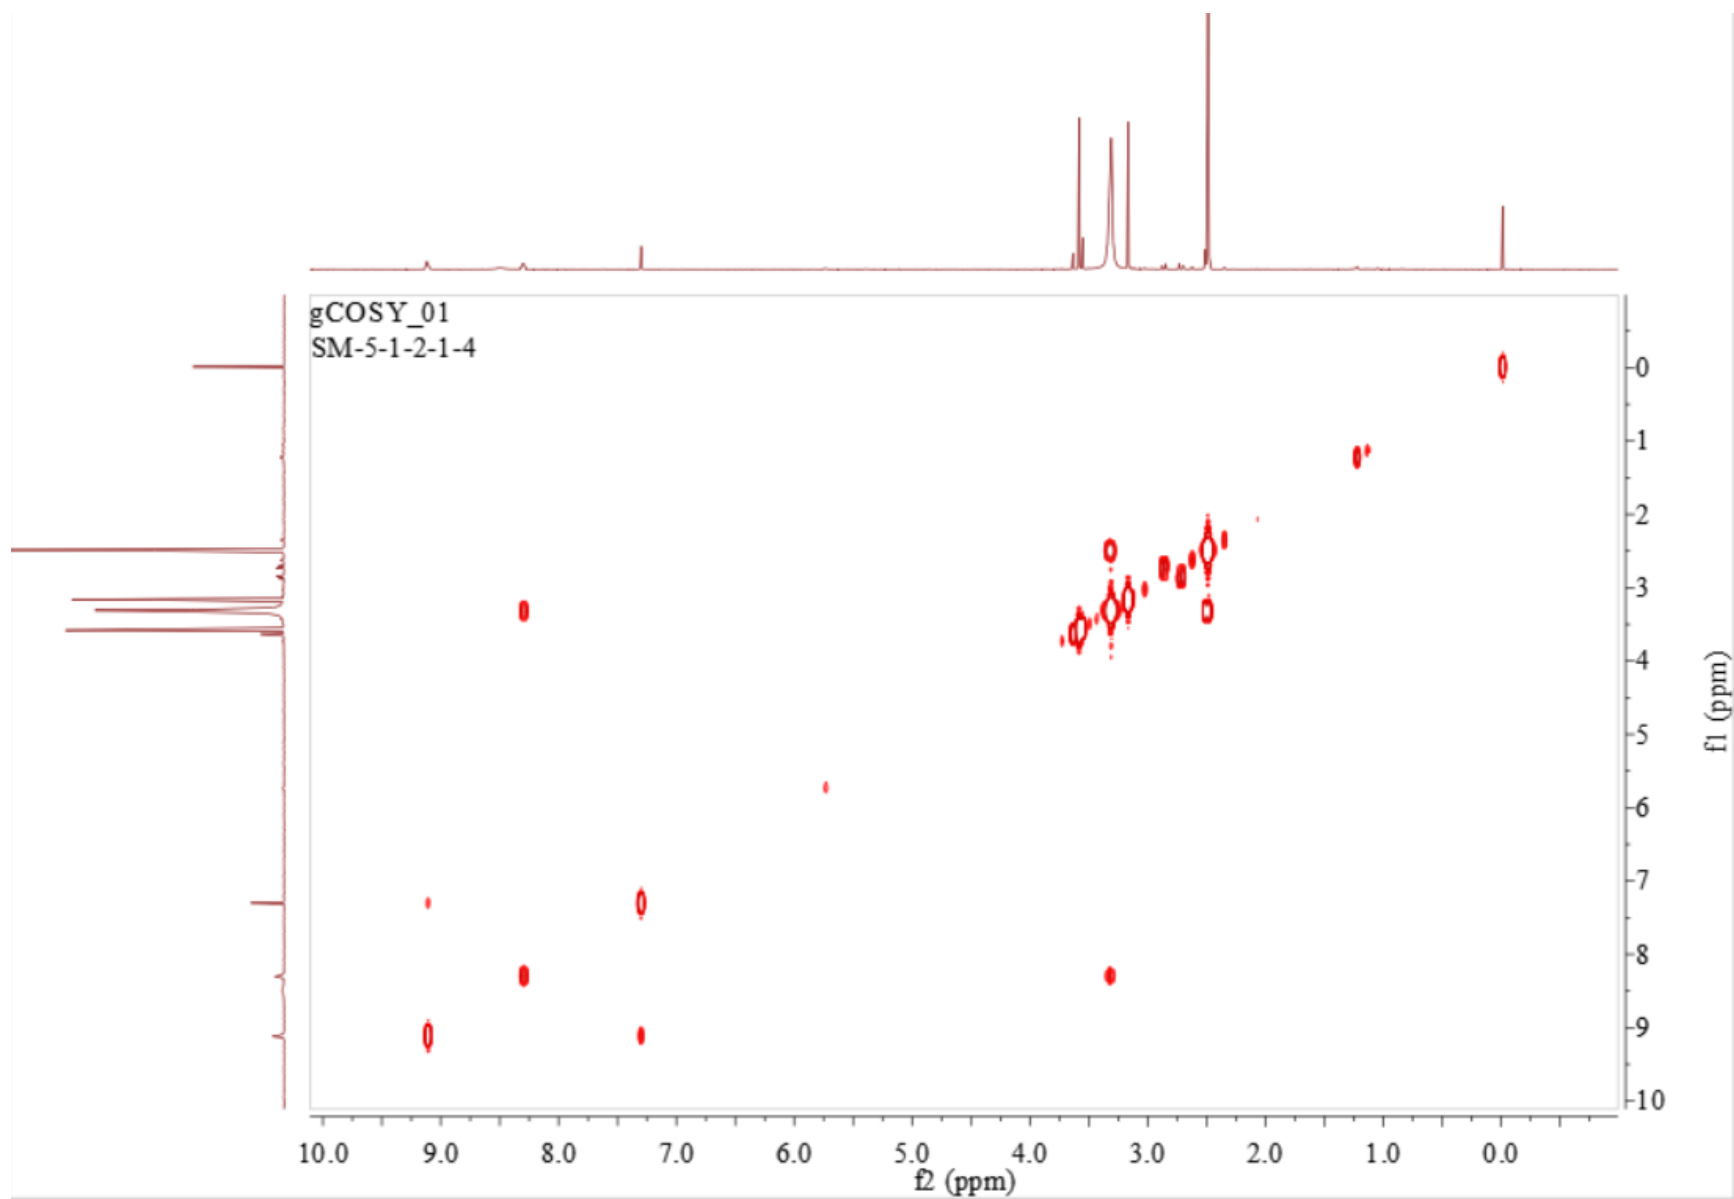

**Figure S106.**  $^1\text{H}$ - $^1\text{H}$  COSY spectrum of compound **12** in  $\text{DMSO}-d_6$  (500 MHz).



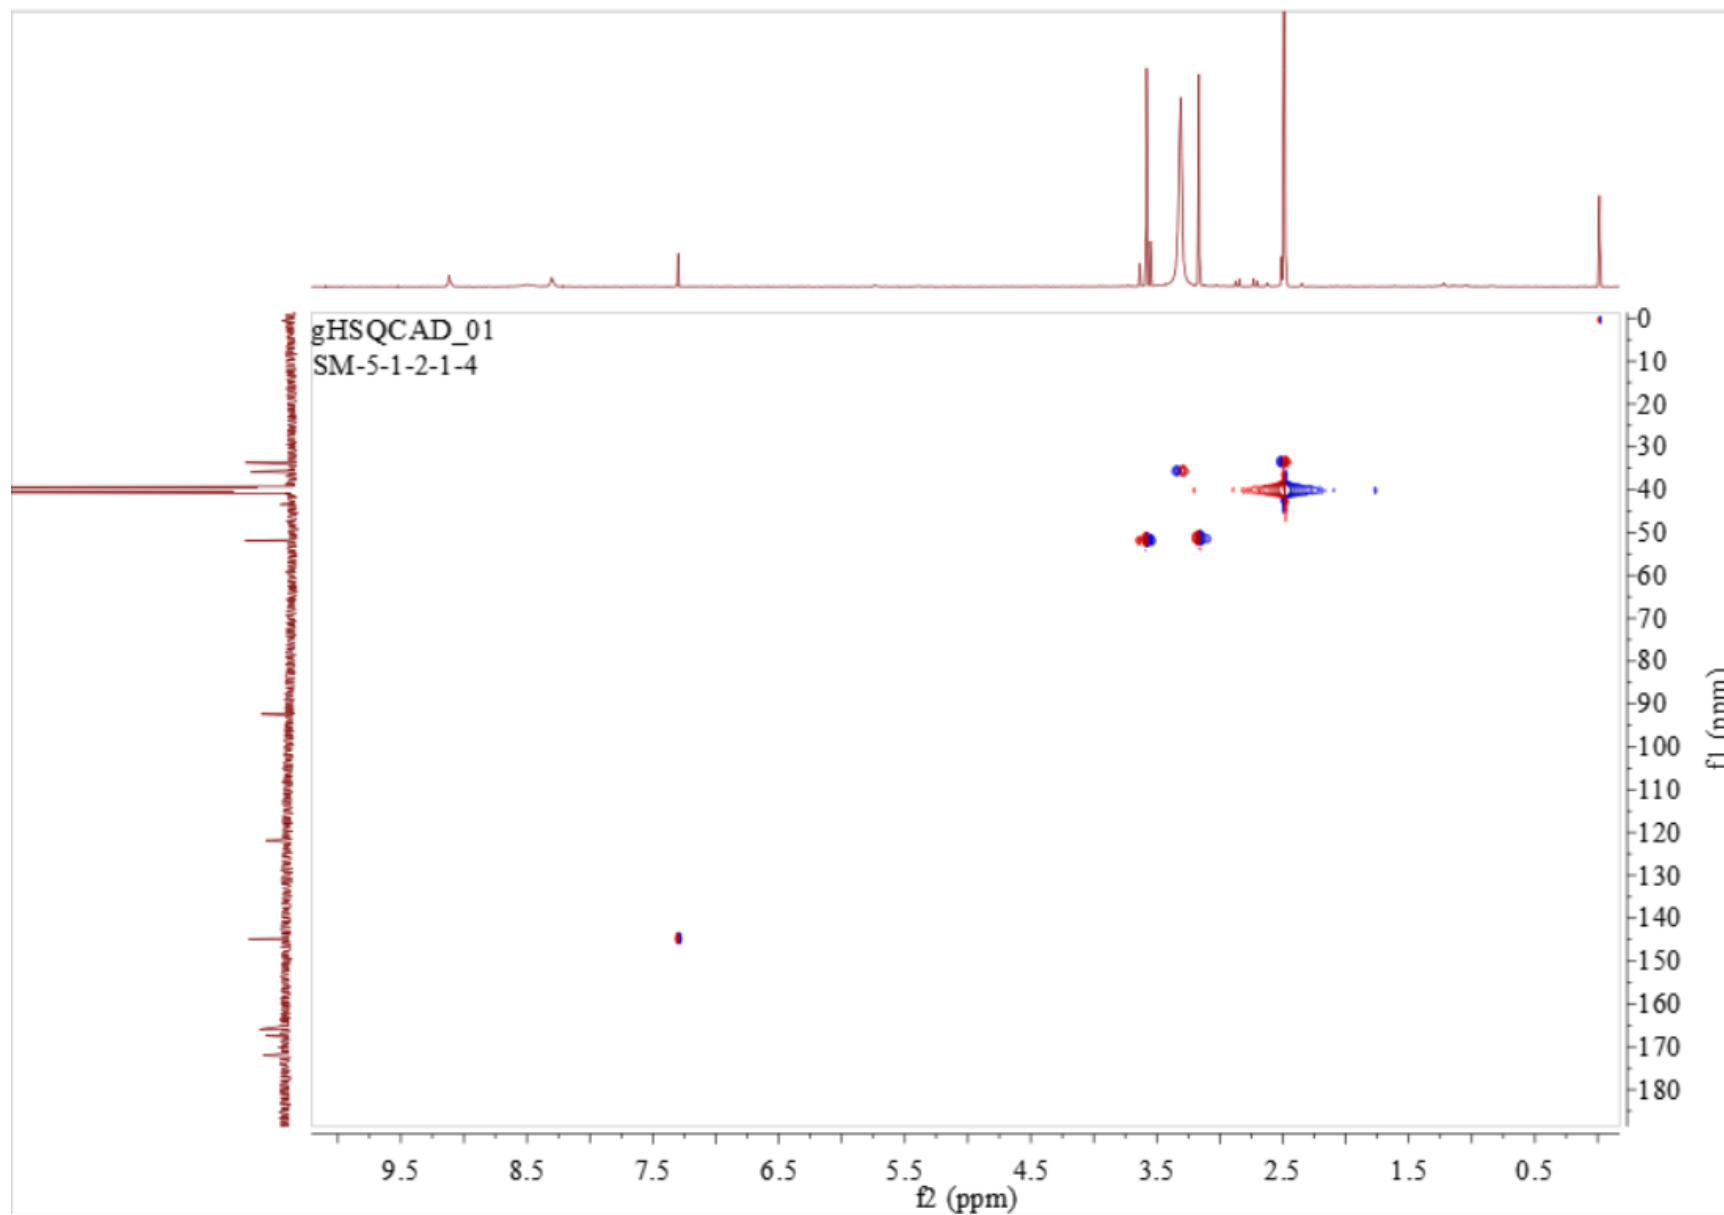

**Figure S107.** HSQC spectrum of compound **12** in DMSO-*d*<sub>6</sub> (500 MHz).

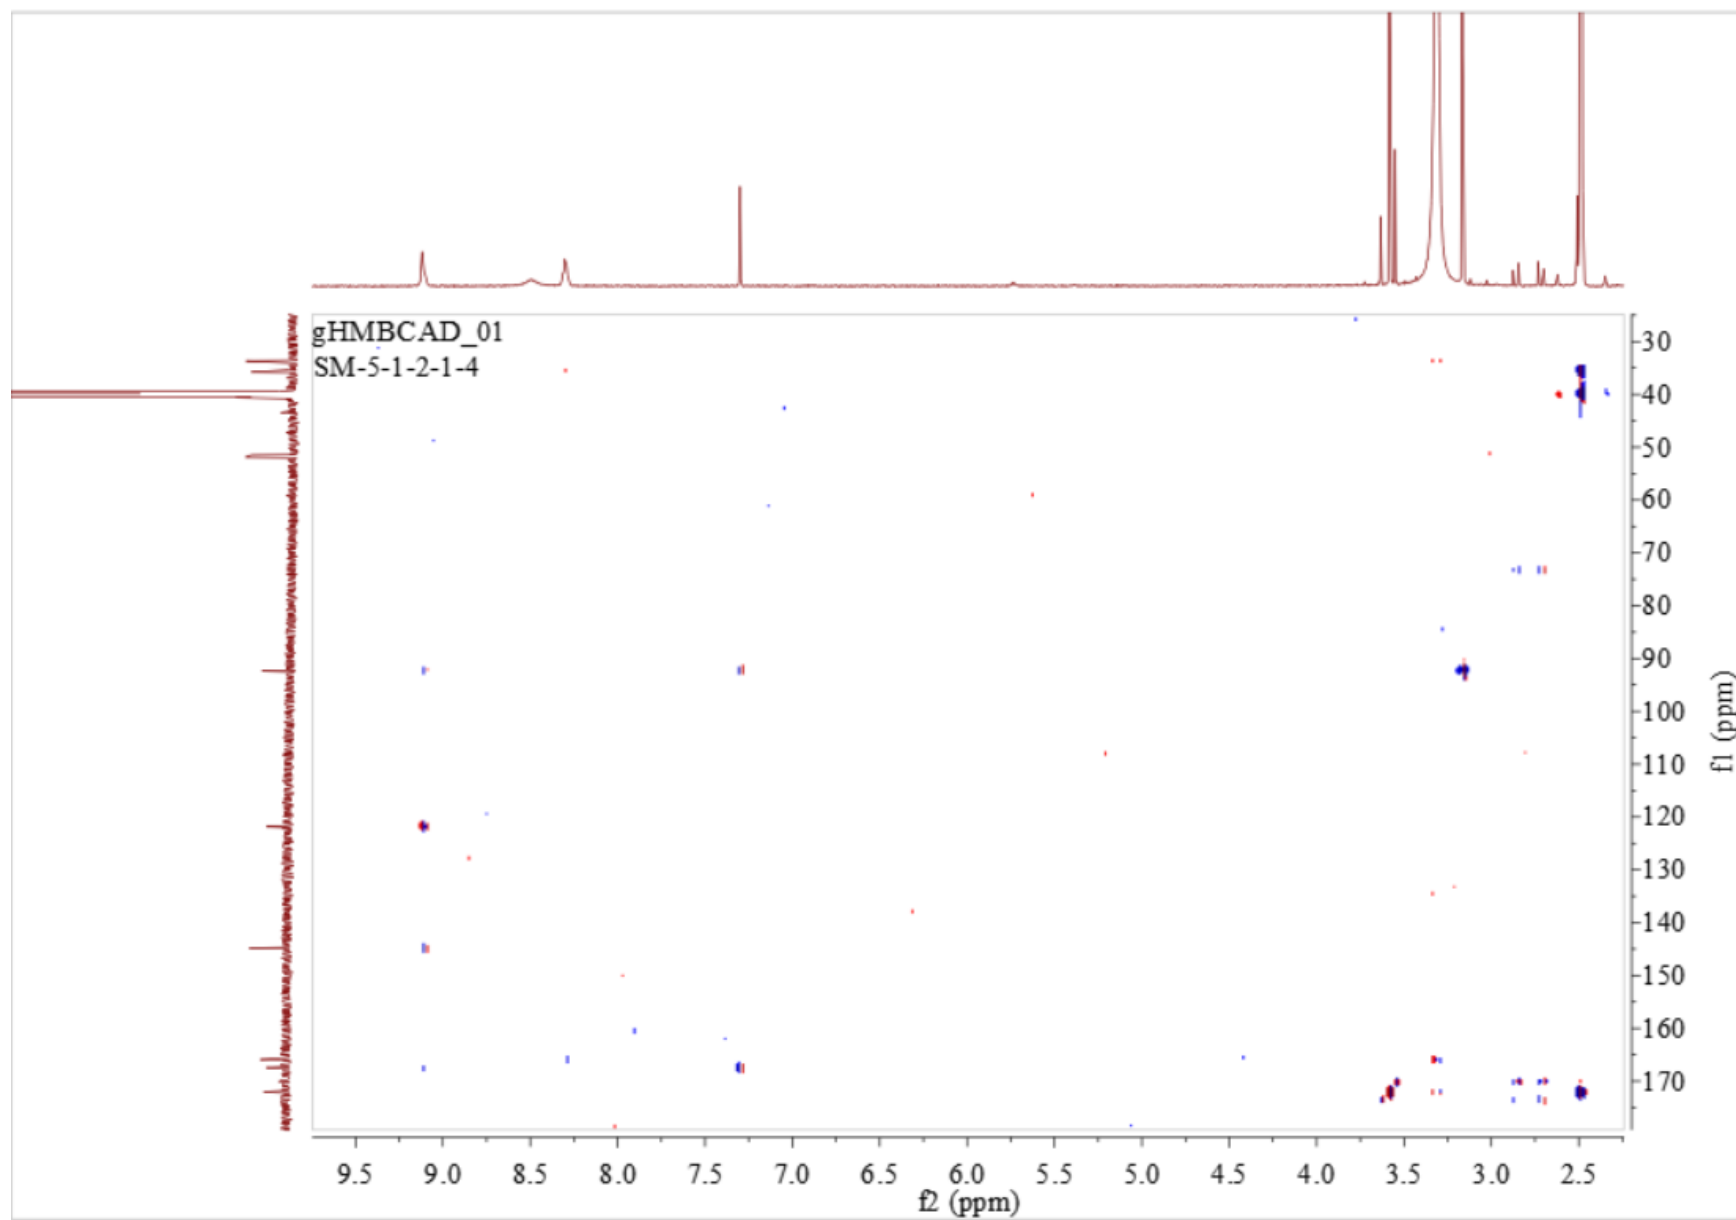

**Figure S108.** HMBC spectrum of compound **12** in DMSO-*d*<sub>6</sub> (500 MHz).

20201223-SM-5-1-2-1-4\_201224100207 #52-53 RT: 0.52-0.53 AV: 2 NL: 1.16E5  
T: FTMS + p ESI Full ms [180.00-1000.00]

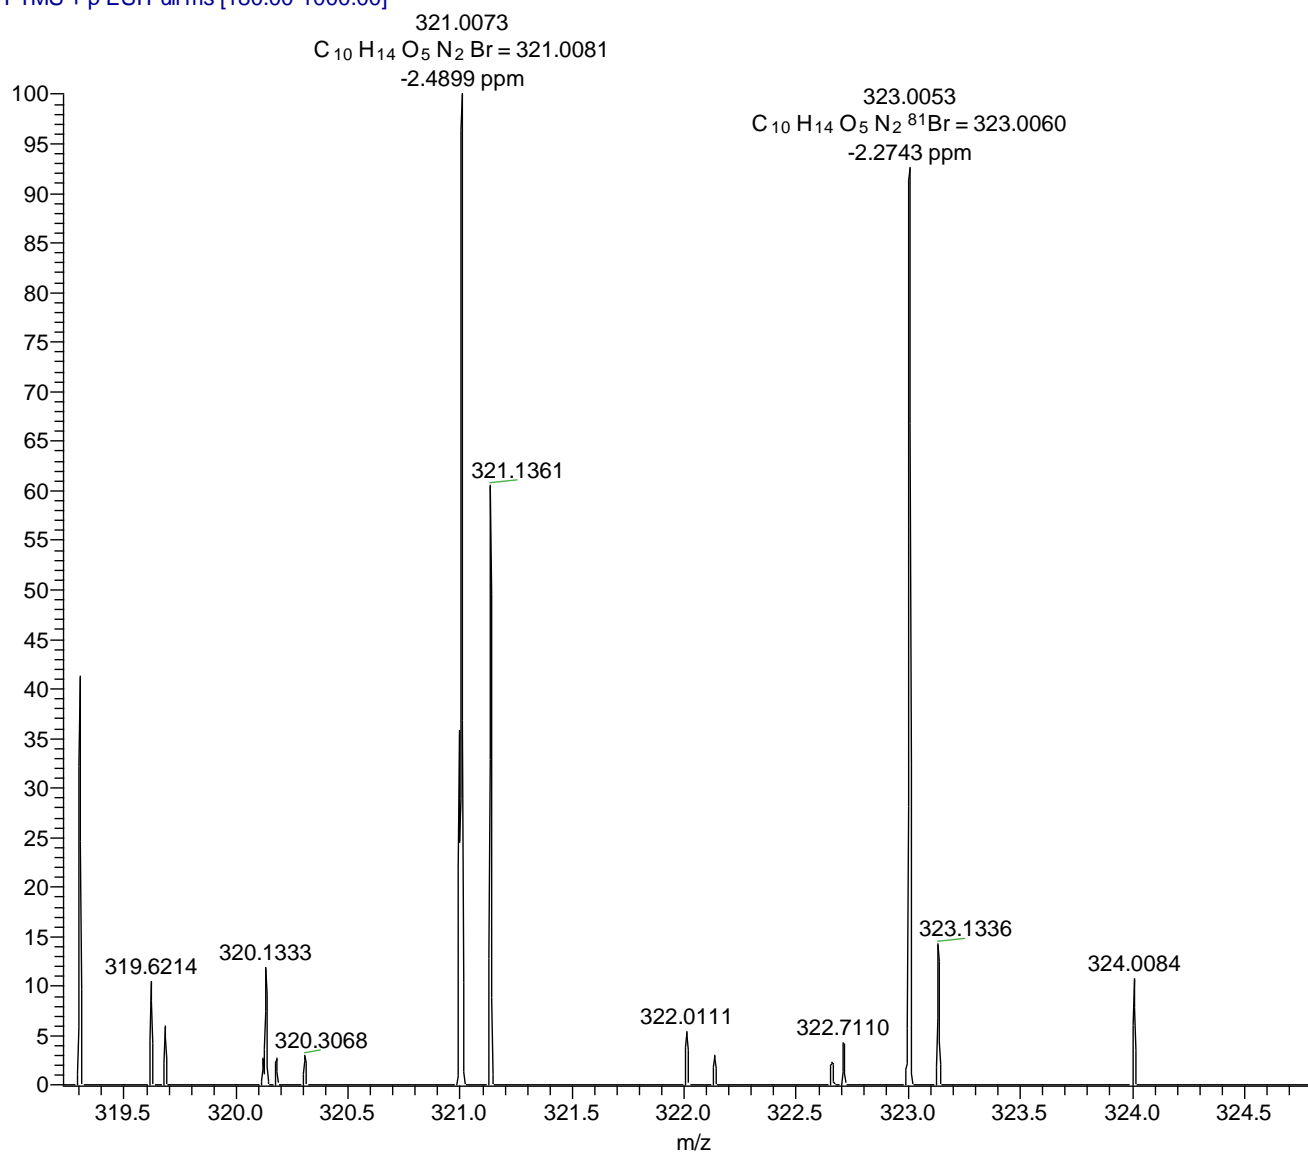

Figure S109. HRESIMS data of compound 12.

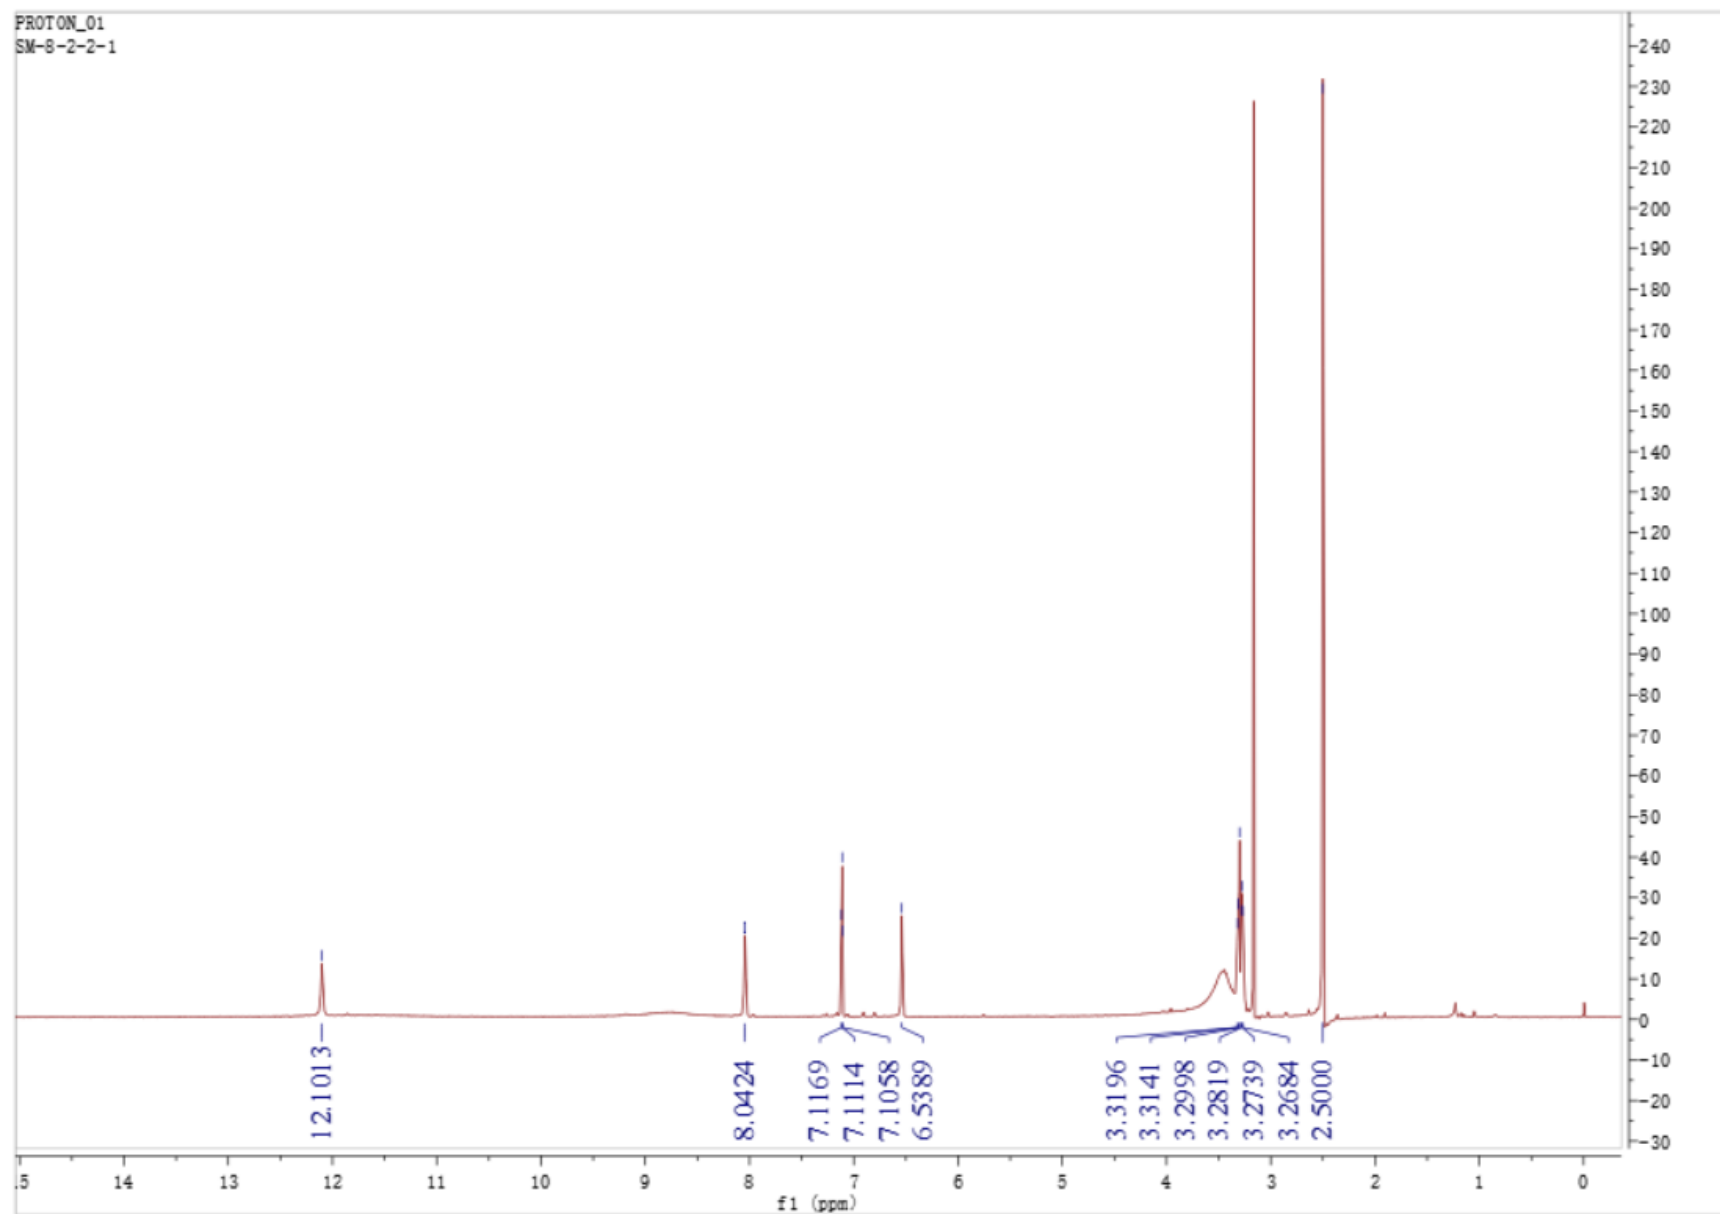

**Figure S110.**  $^1\text{H}$  NMR spectrum of compound **13** in  $\text{DMSO}-d_6$  (500 MHz).

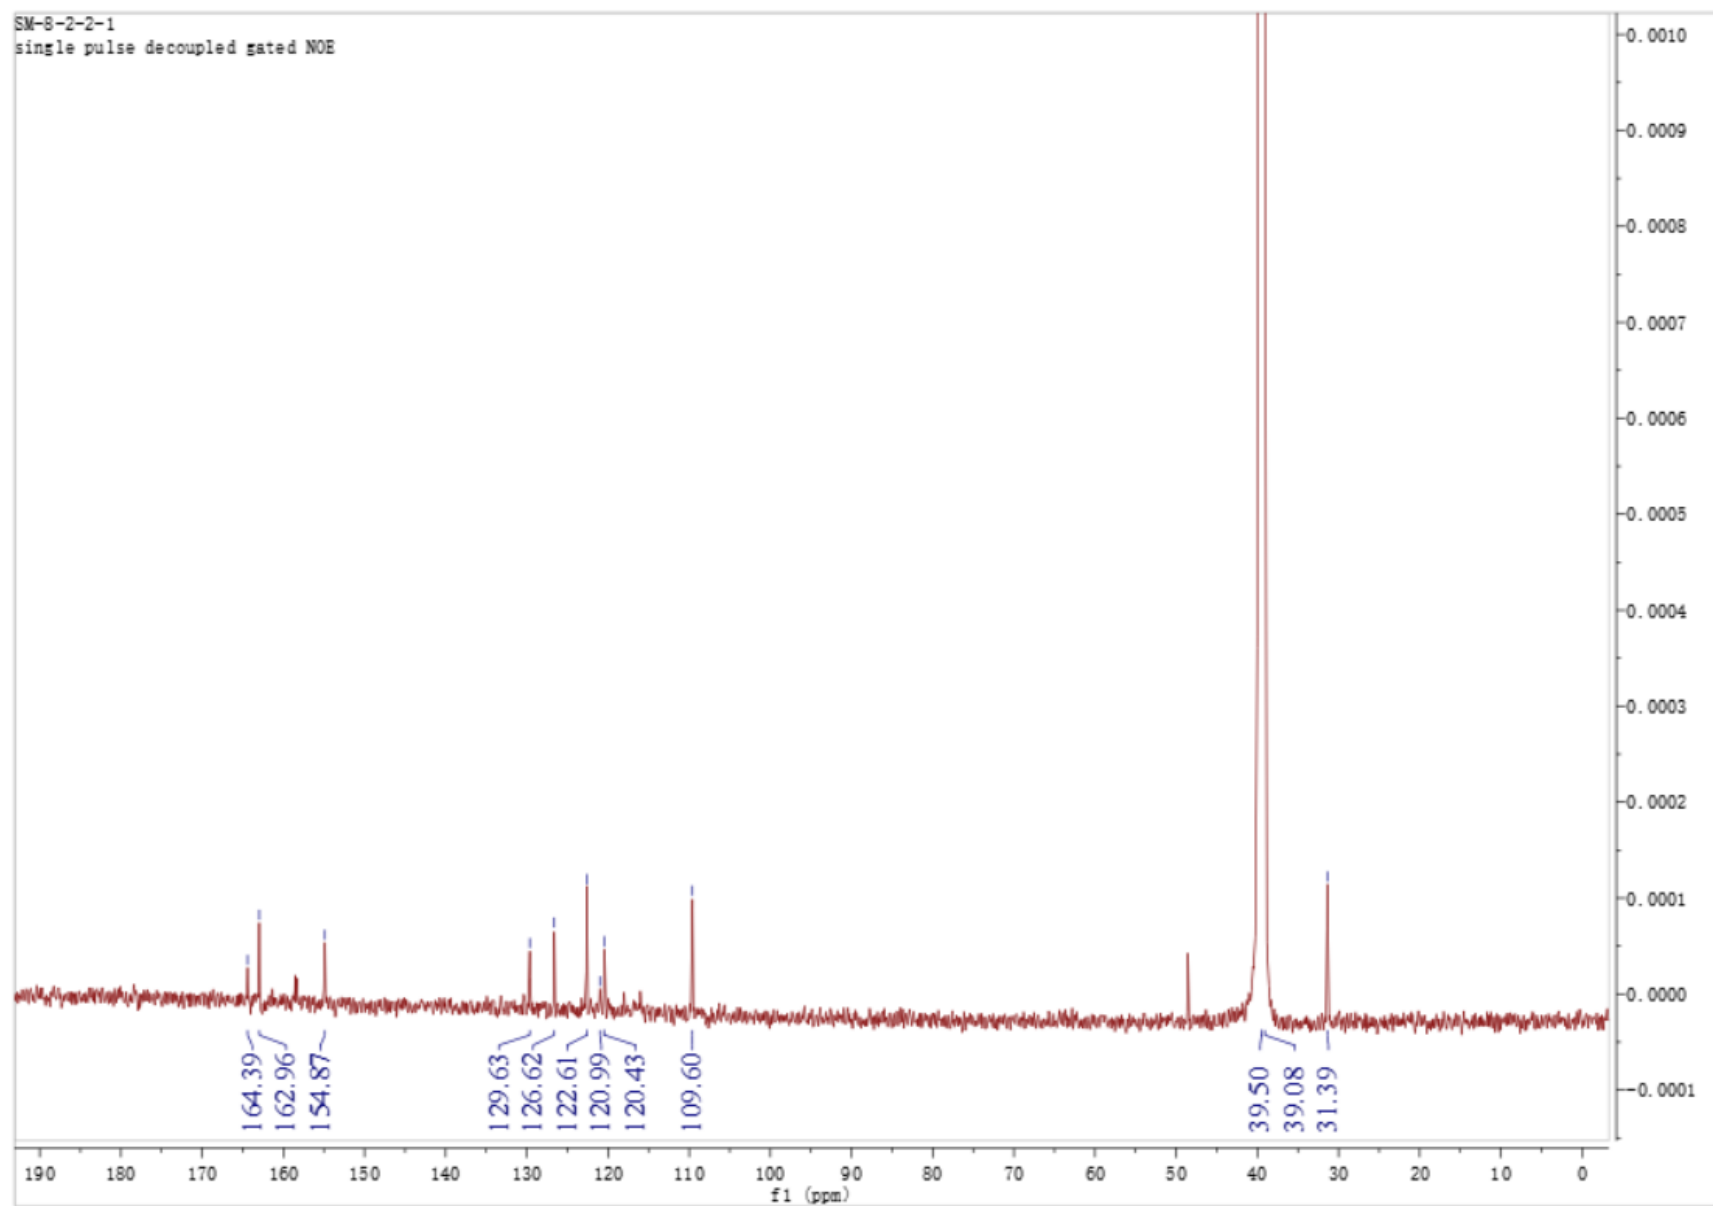

**Figure S111.**  $^{13}\text{C}$  NMR spectrum of compound **13** in  $\text{DMSO}-d_6$  (125 MHz).

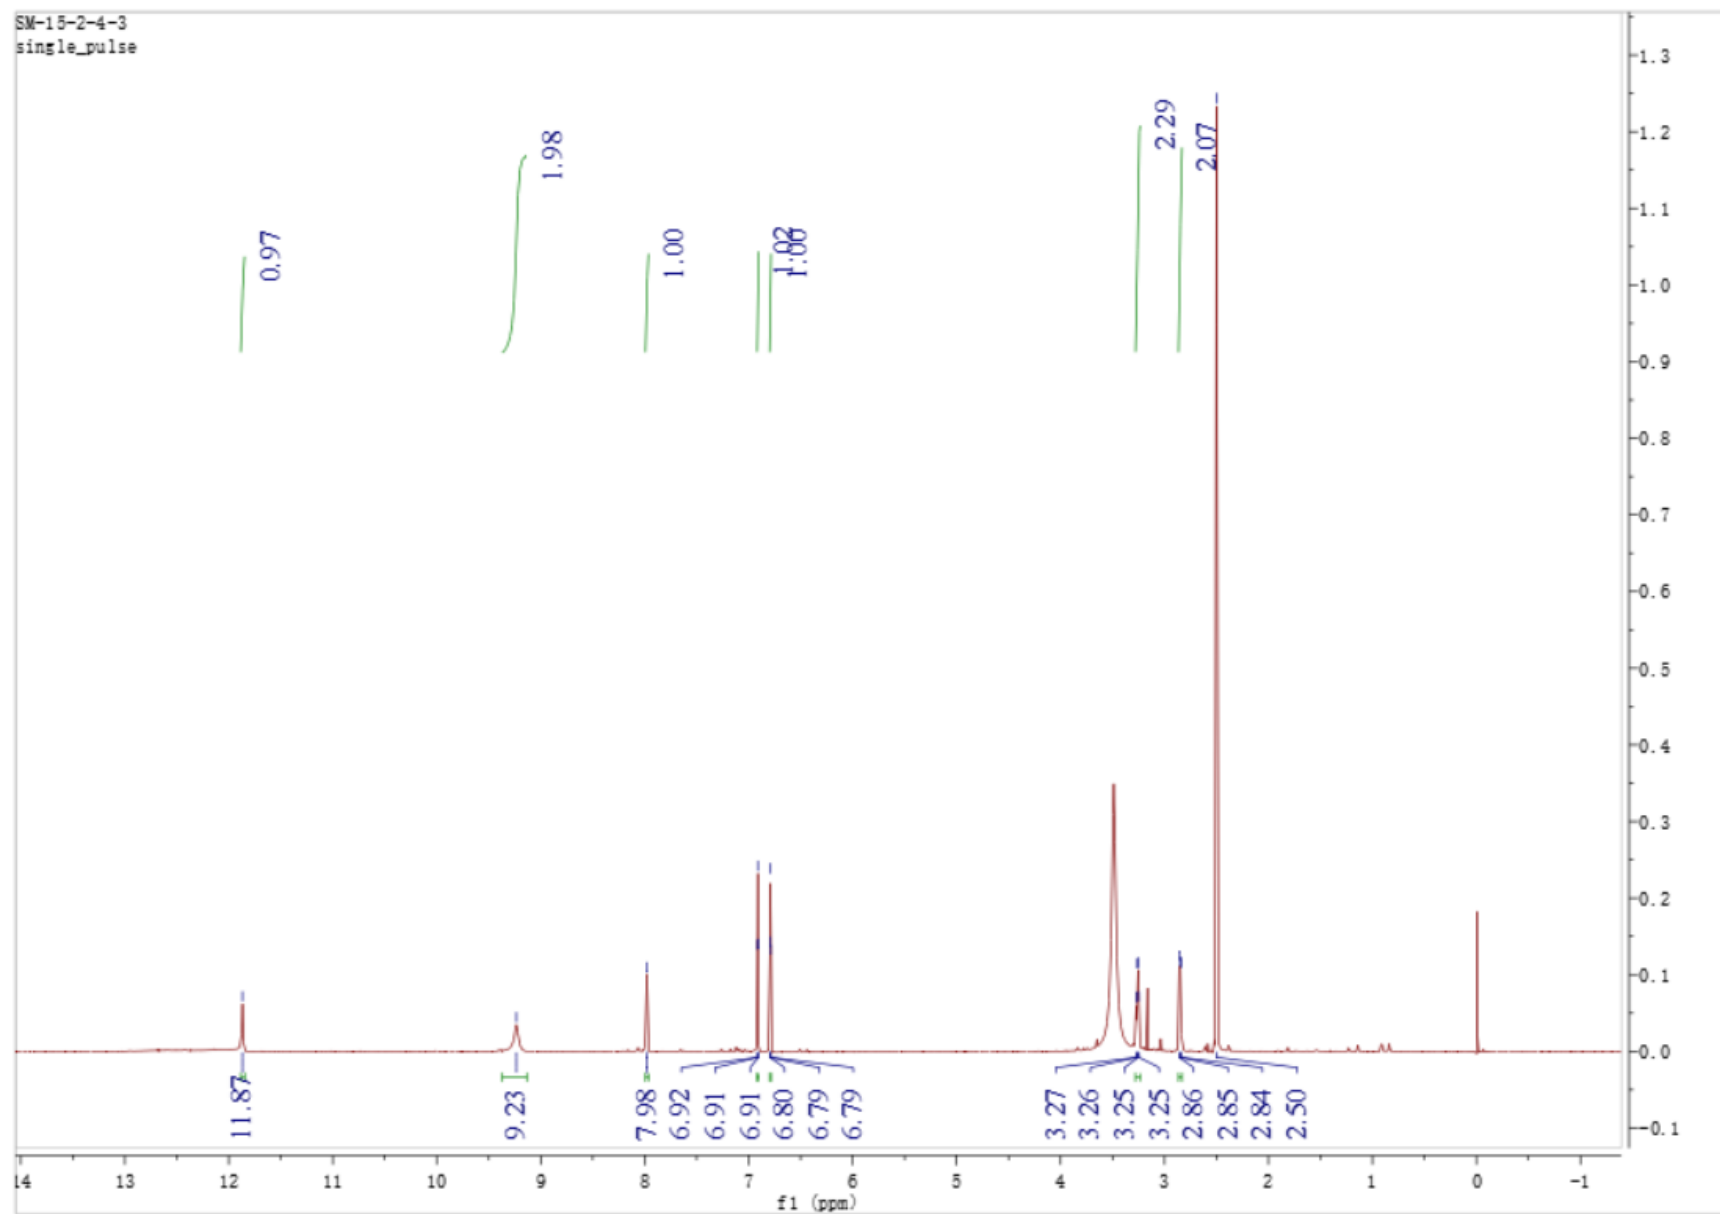

**Figure S112.**  $^1\text{H}$  NMR spectrum of compound **14** in  $\text{DMSO-}d_6$  (500 MHz).

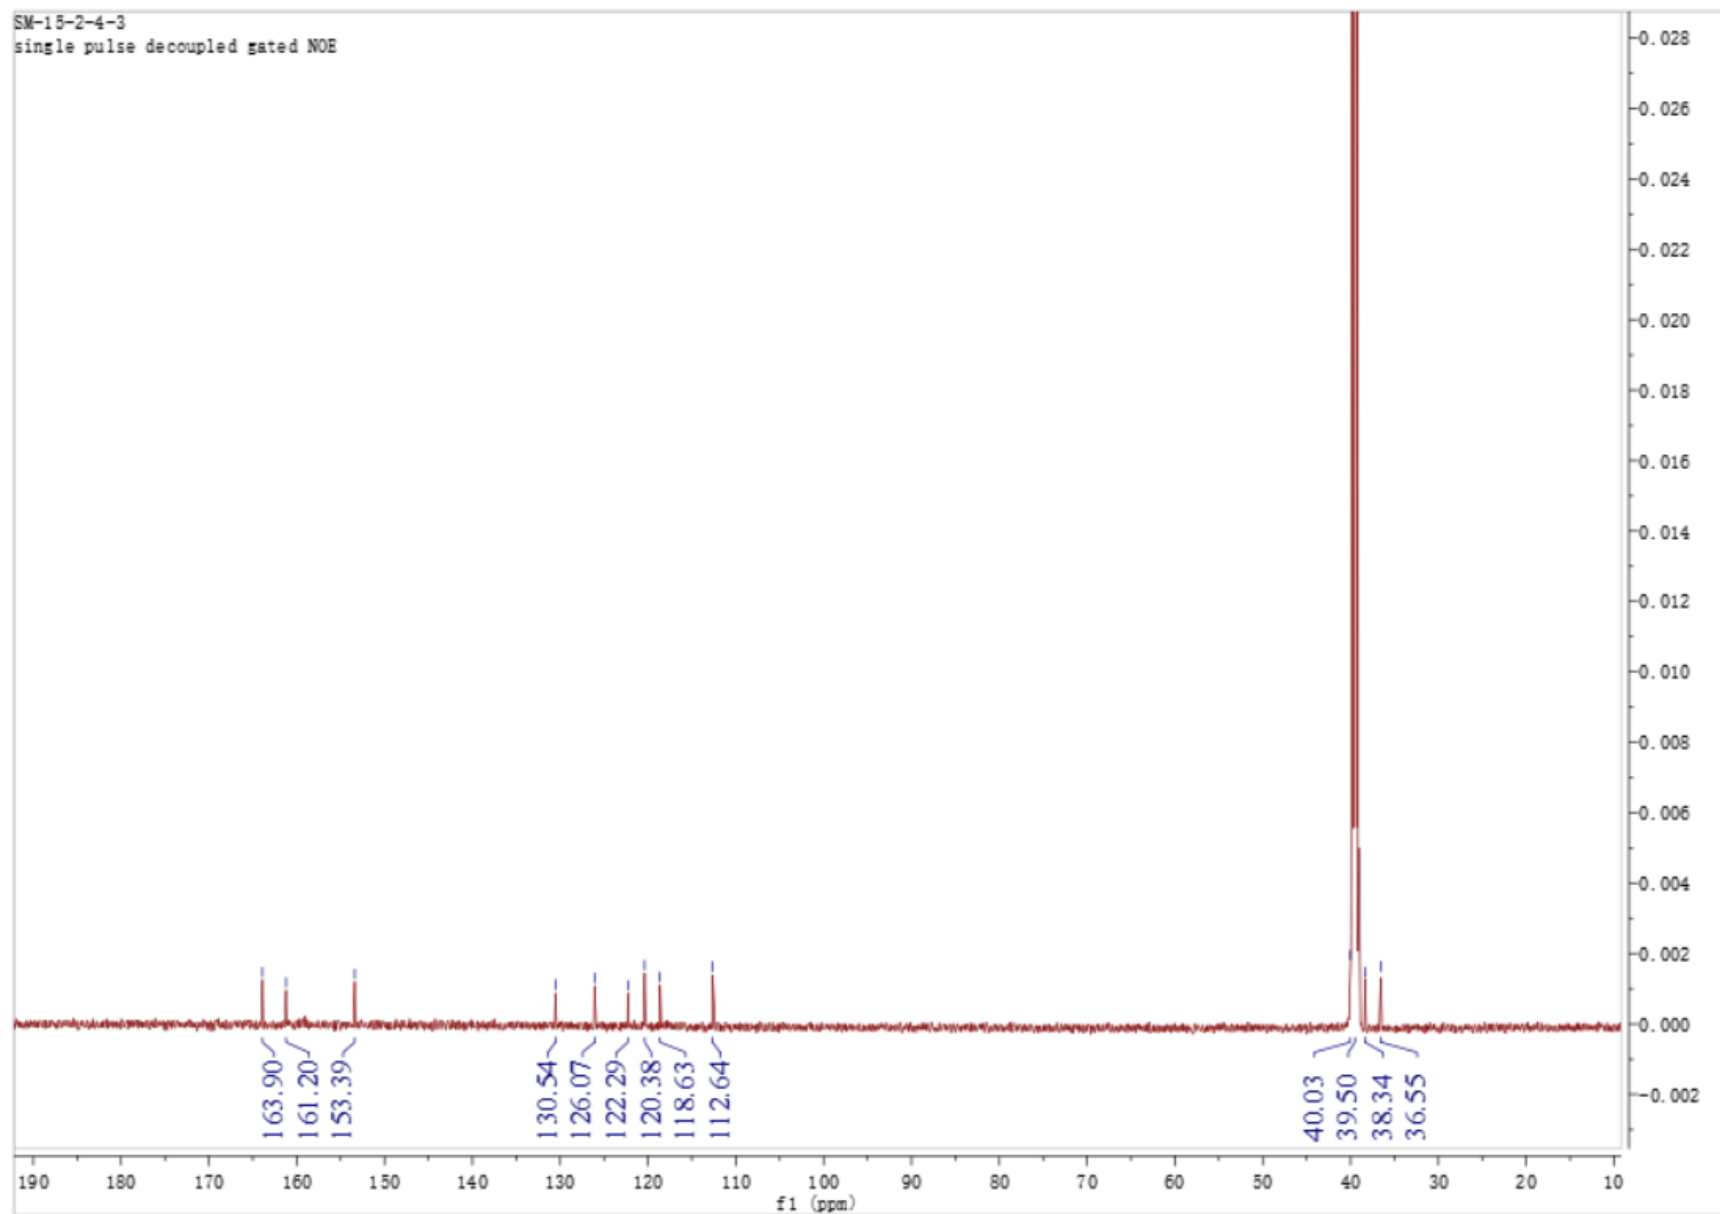

**Figure S113.**  $^{13}\text{C}$  NMR spectrum of compound **14** in  $\text{DMSO}-d_6$  (125 MHz).

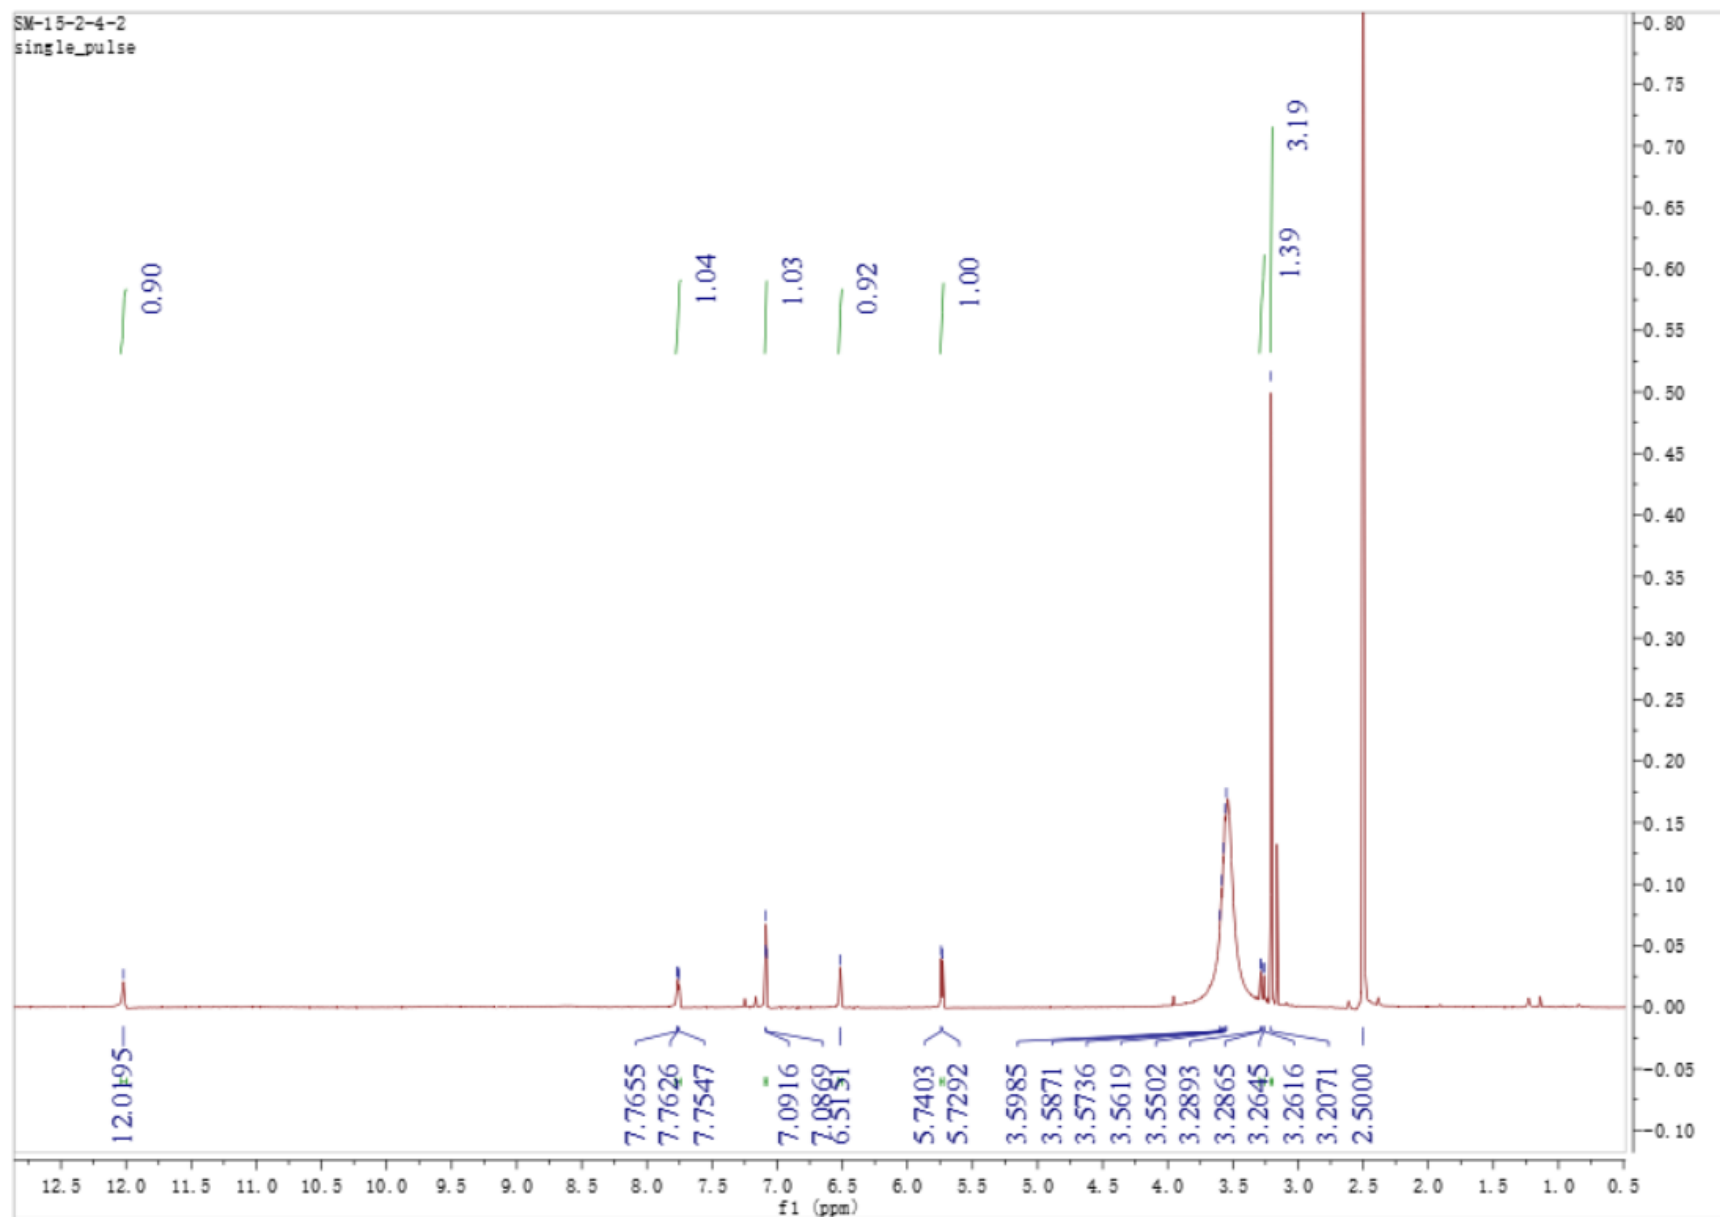

**Figure S114.**  $^1\text{H}$  NMR spectrum of compound **15** in  $\text{DMSO-}d_6$  (500 MHz).



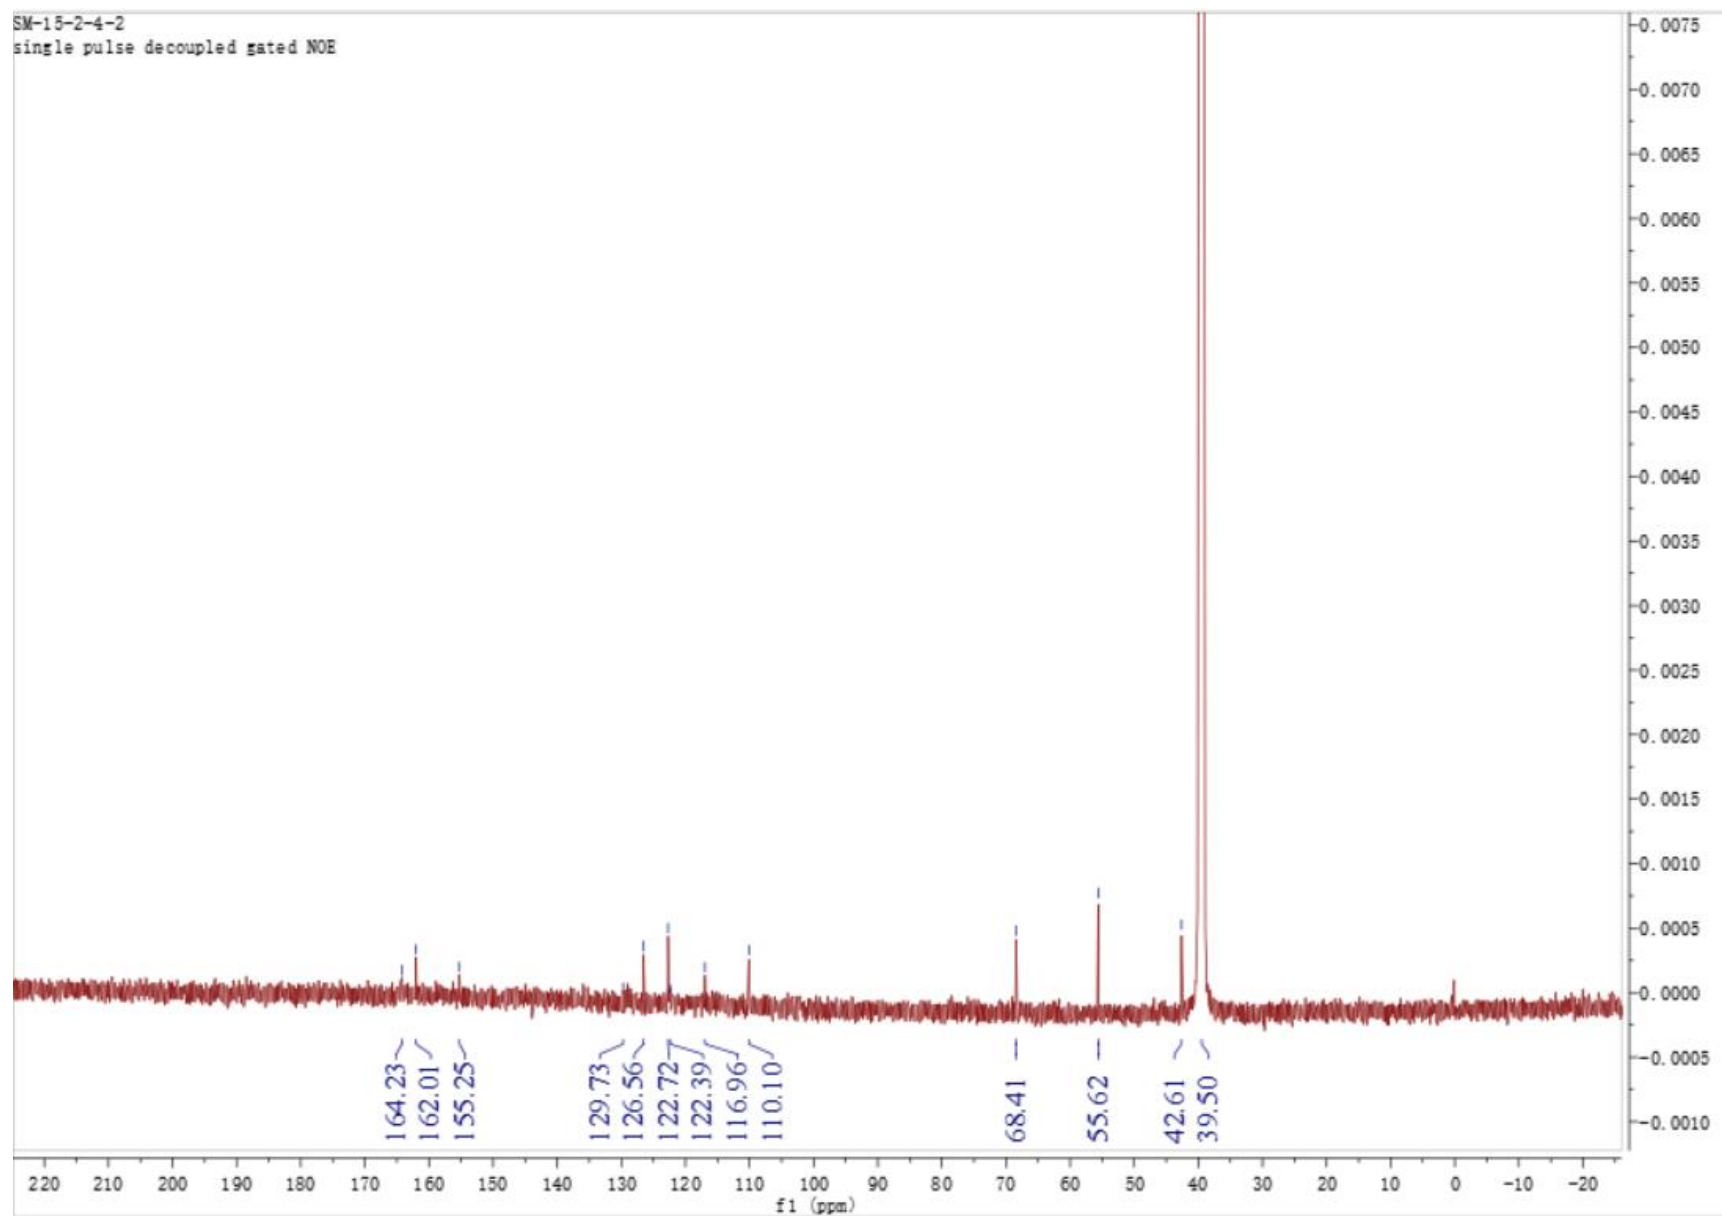

**Figure S115.**  $^{13}\text{C}$  NMR spectrum of compound **15** in  $\text{DMSO-}d_6$  (125 MHz).

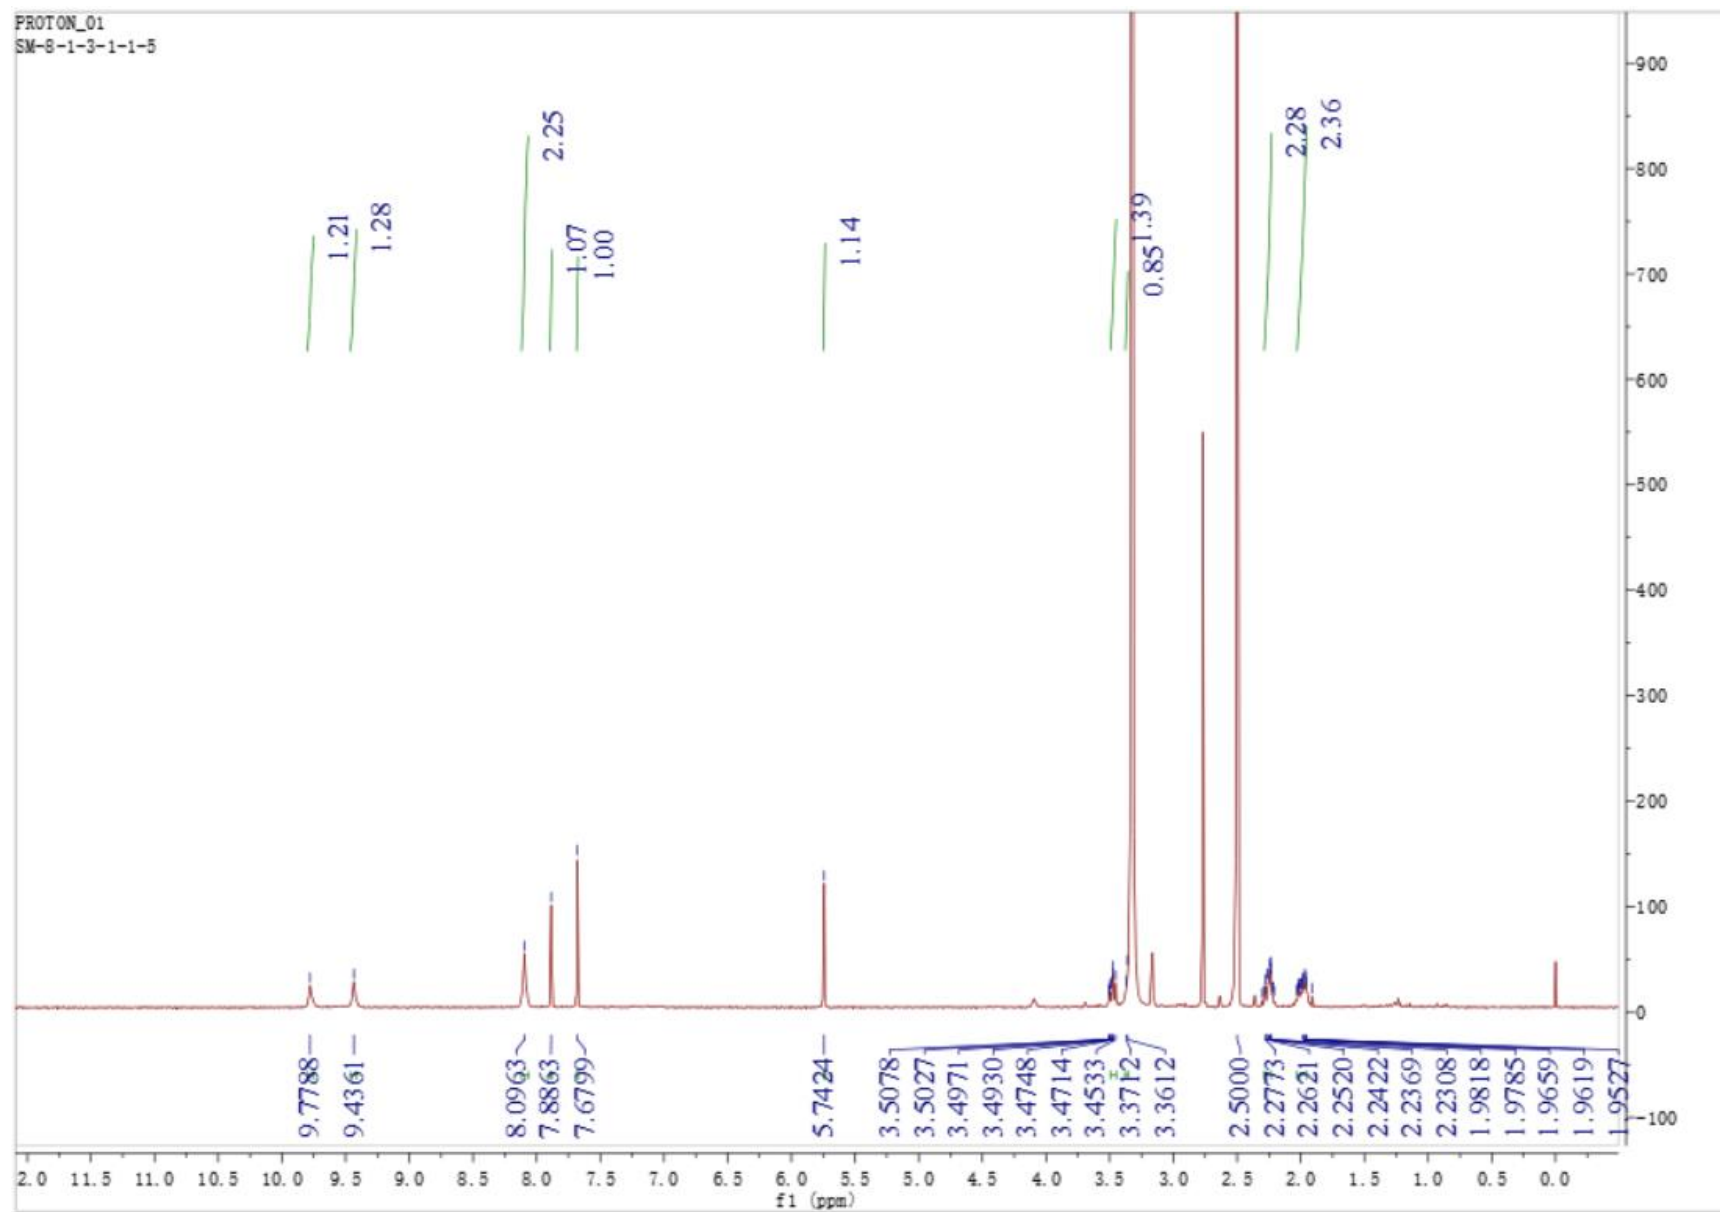

**Figure S116.**  $^1\text{H}$  NMR spectrum of compound **16** in  $\text{DMSO}-d_6$  (500 MHz).

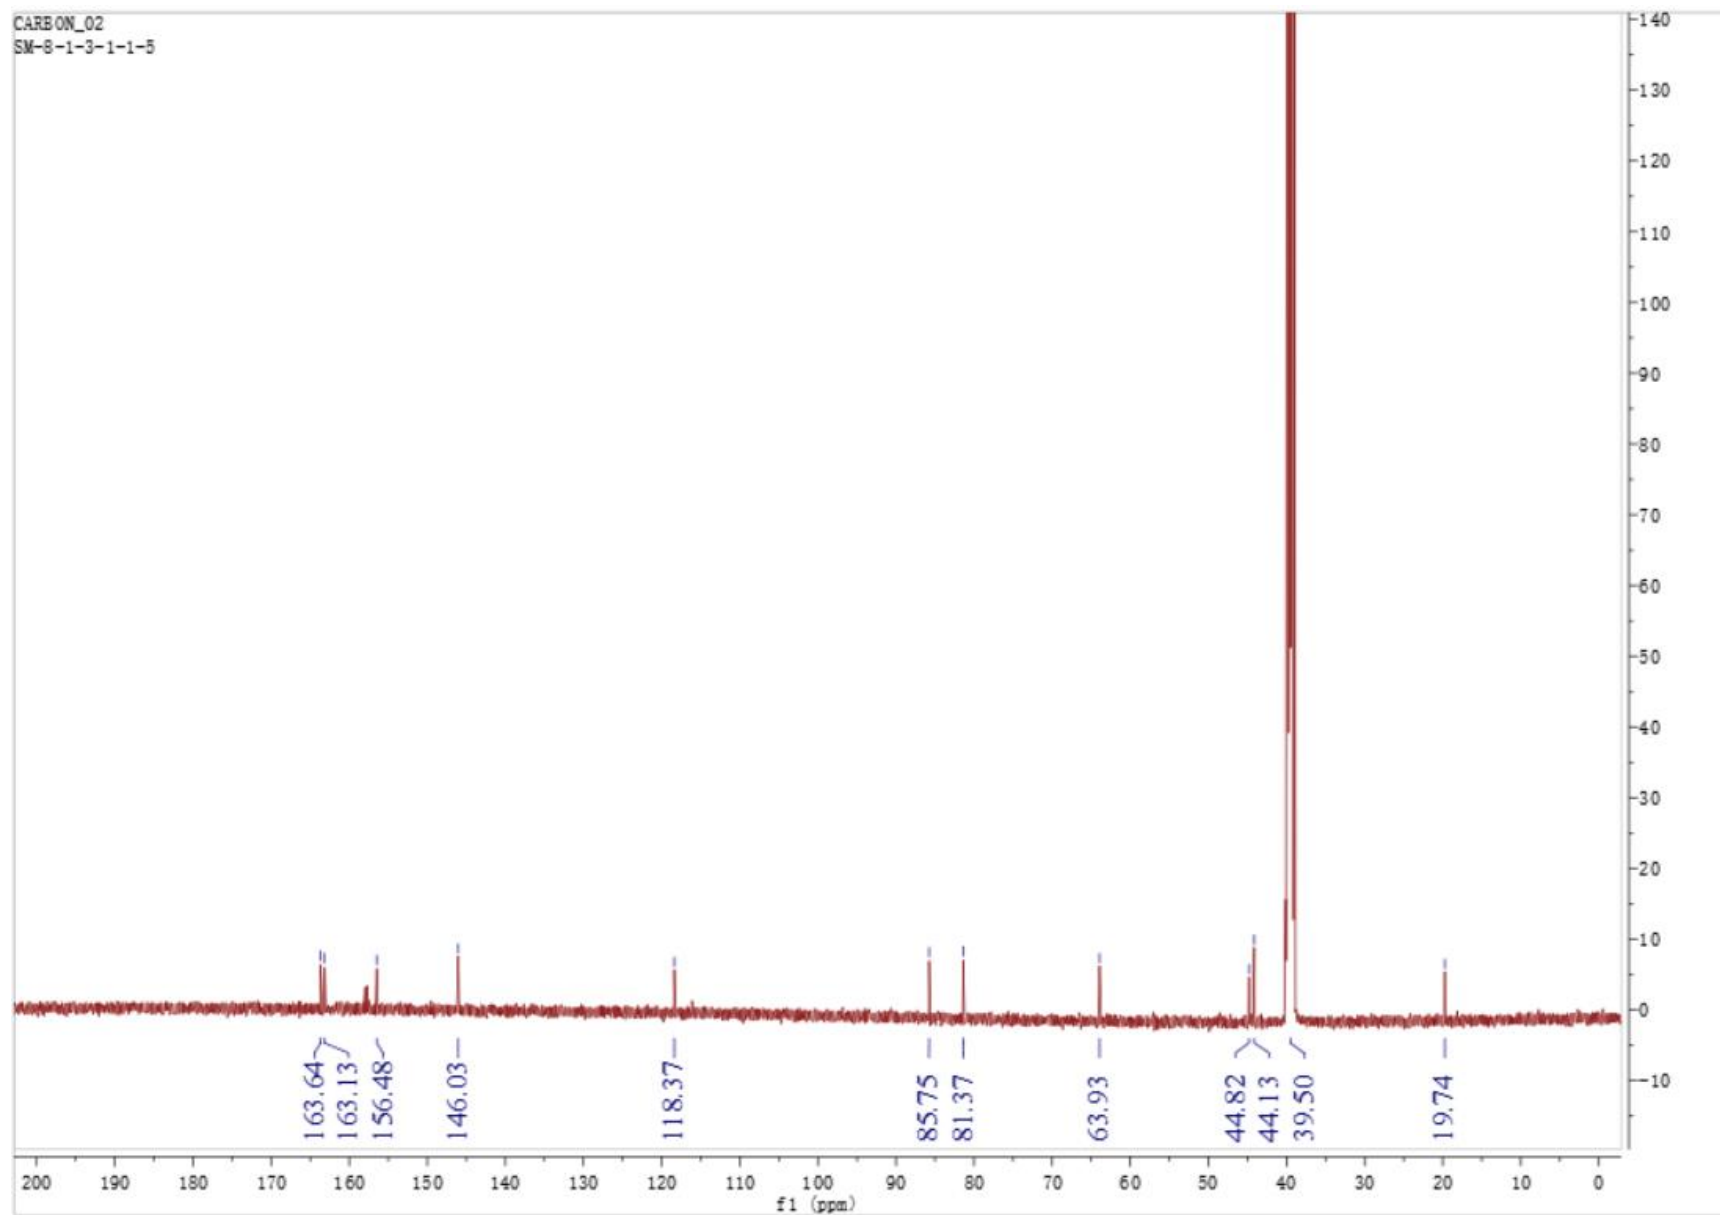

**Figure S117.**  $^{13}\text{C}$  NMR spectrum of compound **16** in  $\text{DMSO}-d_6$  (125 MHz).
