# Supplementary figures and images for: A Series of New Pyrrole Alkaloids with ALR2 Inhibitory Activities from the Sponge Stylissa massa
Source: MDPI journal article supplement (doi:10.3390/md20070454), 2022-07-12

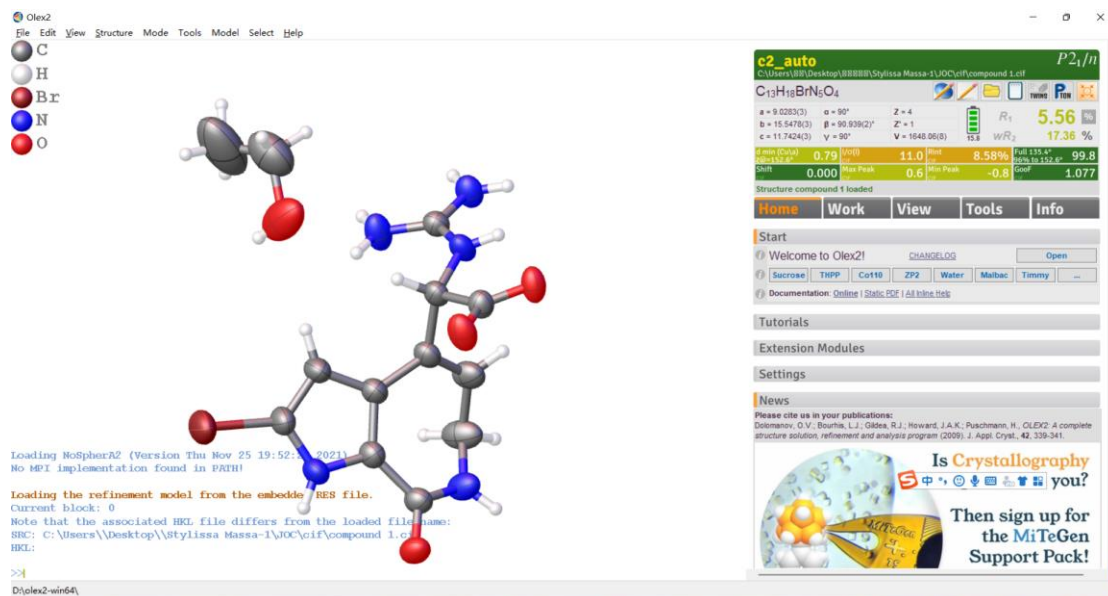

compound 1

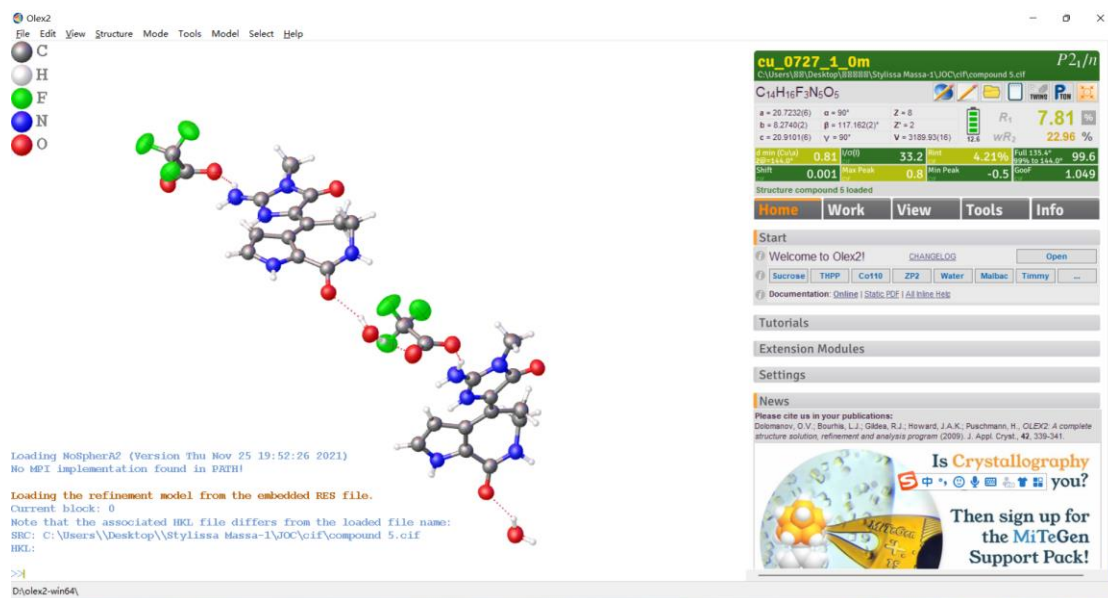

compound 5

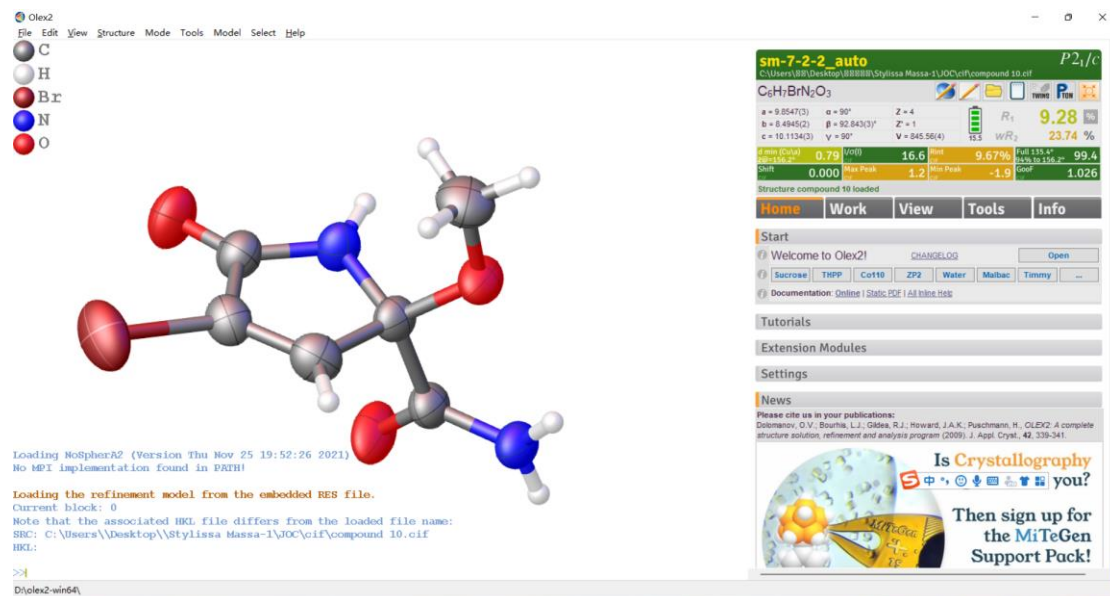

compound 10

Supplement: s1 [file s1]
